# Supplementary material for: A Vaccinomics Approach for the Identification of Tick Protective Antigens for the Control of Ixodes ricinus and Dermacentor reticulatus Infestations in Companion Animals
Source: Front Physiol. 2019 Jul 26;10:977. doi: 10.3389/fphys.2019.00977 (PMC6681794; doi:10.3389/fphys.2019.00977)
Supplement: Supplementary file 1 [file Data_Sheet_1.xls]

## Sheet: genes all
Supplementary Dataset 1. Analysis of transcriptomics data in IL and ISG.
test_id	gene_id	gene	locus	sample_1	sample_2	status	value_1	value_2	log2(fold_change)	test_stat	p_value	q_value	sISGnificant
XLOC_000001	XLOC_000001	ISCW001392	DS611898:199317-199653	ISG	IL	NOTEST	0	0	0	0	1	1	no
XLOC_000002	XLOC_000002	ISCW001393	DS611898:251856-253734	ISG	IL	NOTEST	0	0	0	0	1	1	no
XLOC_000003	XLOC_000003	ISCW001395	DS611898:266216-269332	ISG	IL	OK	1.38286	3.50769	1.34286	-1.28124	0.200108	0.339654	no
XLOC_000004	XLOC_000004	ISCW001396	DS611898:282087-286520	ISG	IL	OK	2.11252	21.7087	3.36124	-3.52889	0.000417307	0.00560432	yes
XLOC_000005	XLOC_000005	ISCW001398	DS611898:302488-305025	ISG	IL	NOTEST	0	0	0	0	1	1	no
XLOC_000006	XLOC_000006	ISCW001399	DS611898:327244-341729	ISG	IL	NOTEST	0	0	0	0	1	1	no
XLOC_000007	XLOC_000007	ISCW001390	DS611898:7239-198427	ISG	IL	NOTEST	0.347979	1.29169	1.89218	-1.97896	0.0478211	1	no
XLOC_000008	XLOC_000008	-	DS611898:257332-257404	ISG	IL	NOTEST	0	0	0	0	1	1	no
XLOC_000009	XLOC_000009	ISCW001397	DS611898:294306-300120	ISG	IL	NOTEST	0	0	0	0	1	1	no
XLOC_000010	XLOC_000010	ISCW001400	DS611898:327244-341729	ISG	IL	NOTEST	0	0	0	0	1	1	no
XLOC_000011	XLOC_000011	ISCW001401	DS611898:365325-366808	ISG	IL	NOTEST	0	0	0	0	1	1	no
XLOC_000012	XLOC_000012	ISCW000241	DS612046:9532-10348	ISG	IL	OK	5.1932	1.21129	-2.10008	2.15074	0.0314967	0.0927553	no
XLOC_000013	XLOC_000013	ISCW001743	DS612089:15932-22899	ISG	IL	NOTEST	0	0	0	0	1	1	no
XLOC_000014	XLOC_000014	ISCW001416	DS612239:118230-118545	ISG	IL	NOTEST	0	0	0	0	1	1	no
XLOC_000015	XLOC_000015	ISCW001415	DS612239:81308-85859	ISG	IL	NOTEST	0	0	0	0	1	1	no
XLOC_000016	XLOC_000016	ISCW000656	DS612308:5675-5840	ISG	IL	OK	48.0705	0	-1.79769e+308	-1.79769e+308	0.0293909	0.0878738	no
XLOC_000017	XLOC_000017	ISCW000655	DS612308:583-1890	ISG	IL	OK	17.8659	71.2134	1.99494	-2.11633	0.0343168	0.0991134	no
XLOC_000018	XLOC_000018	ISCW000657	DS612308:15984-17064	ISG	IL	OK	87.4752	9.60539	-3.18696	3.13537	0.00171639	0.0153533	yes
XLOC_000019	XLOC_000019	-	DS612357:17141-29702	ISG	IL	NOTEST	0	0	0	0	1	1	no
XLOC_000020	XLOC_000020	ISCW000086	DS612357:30134-31942	ISG	IL	OK	2.38138	0.805397	-1.56403	1.61061	0.107264	0.222381	no
XLOC_000021	XLOC_000021	ISCW000087	DS612357:41468-51462	ISG	IL	OK	12.1222	12.4486	0.0383302	-0.0410058	0.967291	0.980283	no
XLOC_000022	XLOC_000022	ISCW000084	DS612357:17141-29702	ISG	IL	OK	7.09733	2.64039	-1.42652	1.50172	0.133169	0.260812	no
XLOC_000023	XLOC_000023	ISCW001294	DS612374:20700-60194	ISG	IL	NOTEST	0	0	0	0	1	1	no
XLOC_000024	XLOC_000024	ISCW000162	DS612409:11657-51989	ISG	IL	OK	6.7075	1.22151	-2.45711	2.51555	0.0118846	0.0614689	no
XLOC_000025	XLOC_000025	ISCW000148	DS612423:1085-10545	ISG	IL	NOTEST	0	0	0	0	1	1	no
XLOC_000026	XLOC_000026	ISCW024020	DS612508:3751-4822	ISG	IL	OK	0	16.0277	1.79769e+308	1.79769e+308	0.017132	0.0678946	no
XLOC_000027	XLOC_000027	-	DS612579:36655-36726	ISG	IL	NOTEST	0	0	0	0	1	1	no
XLOC_000028	XLOC_000028	ISCW000320	DS612579:166-8195	ISG	IL	NOTEST	0.483424	0.49049	0.0209353	-0.0185292	0.985217	1	no
XLOC_000029	XLOC_000029	ISCW000321	DS612579:26459-33552	ISG	IL	NOTEST	0	0	0	0	1	1	no
XLOC_000030	XLOC_000030	ISCW001638	DS612599:454-43362	ISG	IL	NOTEST	0	0.113217	1.79769e+308	1.79769e+308	0.158655	1	no
XLOC_000031	XLOC_000031	-	DS612599:114775-114859	ISG	IL	NOTEST	0	0	0	0	1	1	no
XLOC_000032	XLOC_000032	-	DS612599:124184-124268	ISG	IL	NOTEST	0	0	0	0	1	1	no
XLOC_000033	XLOC_000033	ISCW001642	DS612599:141121-141454	ISG	IL	NOTEST	0	0	0	0	1	1	no
XLOC_000034	XLOC_000034	ISCW001469	DS612648:10007-11010	ISG	IL	NOTEST	0	0.568368	1.79769e+308	1.79769e+308	0.158655	1	no
XLOC_000035	XLOC_000035	ISCW001470	DS612648:102288-103529	ISG	IL	OK	14.2835	25.3615	0.82829	-0.884966	0.376175	0.532045	no
XLOC_000036	XLOC_000036	ISCW001471	DS612648:107681-116286	ISG	IL	OK	7.01782	5.39424	-0.379603	0.403462	0.686608	0.798593	no
XLOC_000037	XLOC_000037	ISCW001472	DS612648:118763-138609	ISG	IL	OK	11.7664	20.7719	0.819962	-0.85589	0.392059	0.548223	no
XLOC_000038	XLOC_000038	ISCW016127	DS612679:70024-70648	ISG	IL	NOTEST	0	0	0	0	1	1	no
XLOC_000039	XLOC_000039	ISCW016126	DS612679:2428-2501	ISG	IL	NOTEST	0	0	0	0	1	1	no
XLOC_000040	XLOC_000040	ISCW015979	DS612682:100978-116859	ISG	IL	OK	0	2.18335	1.79769e+308	1.79769e+308	0.0146491	0.066059	no
XLOC_000041	XLOC_000041	ISCW015978	DS612682:34528-36769	ISG	IL	NOTEST	0	0	0	0	1	1	no
XLOC_000042	XLOC_000042	ISCW015981	DS612682:133658-143532	ISG	IL	OK	0	3.17122	1.79769e+308	1.79769e+308	0.0146491	0.066059	no
XLOC_000043	XLOC_000043	ISCW015982	DS612682:208980-240639	ISG	IL	OK	13.8953	7.08752	-0.971245	0.982035	0.326083	0.481566	no
XLOC_000044	XLOC_000044	ISCW000820	DS612708:28217-33453	ISG	IL	OK	9.81334	3.74718	-1.38894	1.43039	0.152606	0.285968	no
XLOC_000045	XLOC_000045	ISCW000819	DS612708:7760-23360	ISG	IL	OK	48.0113	7.24897	-2.72753	2.82836	0.00467872	0.0315726	yes
XLOC_000046	XLOC_000046	ISCW001241	DS612784:10287-17451	ISG	IL	NOTEST	0.329395	1.11403	1.7579	-1.75077	0.0799856	1	no
XLOC_000047	XLOC_000047	ISCW000089	DS612798:8997-18771	ISG	IL	OK	3.39462	0.934483	-1.86101	1.91404	0.0556155	0.138936	no
XLOC_000048	XLOC_000048	-	DS612843:102429-102511	ISG	IL	NOTEST	0	0	0	0	1	1	no
XLOC_000049	XLOC_000049	ISCW000286	DS612843:12217-101867	ISG	IL	NOTEST	0	0	0	0	1	1	no
XLOC_000050	XLOC_000050	ISCW016204	DS612847:51313-71558	ISG	IL	NOTEST	0	0	0	0	1	1	no
XLOC_000051	XLOC_000051	ISCW016205	DS612847:81094-89197	ISG	IL	NOTEST	0	0	0	0	1	1	no
XLOC_000052	XLOC_000052	ISCW016206	DS612847:142861-143579	ISG	IL	NOTEST	0	0	0	0	1	1	no
XLOC_000053	XLOC_000053	ISCW016208	DS612847:269616-280135	ISG	IL	NOTEST	0	0	0	0	1	1	no
XLOC_000054	XLOC_000054	ISCW016210	DS612847:367140-457524	ISG	IL	OK	0	2.77143	1.79769e+308	1.79769e+308	0.0163813	0.0672943	no
XLOC_000055	XLOC_000055	-	DS612847:611699-611773	ISG	IL	NOTEST	0	0	0	0	1	1	no
XLOC_000056	XLOC_000056	-	DS612847:613565-613638	ISG	IL	NOTEST	0	0	0	0	1	1	no
XLOC_000057	XLOC_000057	ISCW016217	DS612847:735425-738116	ISG	IL	OK	303.662	205.02	-0.566696	0.561348	0.57456	0.712786	no
XLOC_000058	XLOC_000058	ISCW016223	DS612847:866167-873610	ISG	IL	OK	15.4683	3.39706	-2.18696	2.26885	0.0232772	0.0773366	no
XLOC_000059	XLOC_000059	ISCW016224	DS612847:885550-898259	ISG	IL	OK	21.5365	4.91543	-2.1314	2.22636	0.0259898	0.0839654	no
XLOC_000060	XLOC_000060	ISCW016226	DS612847:918450-945989	ISG	IL	OK	2.87965	2.4747	-0.21864	0.233728	0.815196	0.887048	no
XLOC_000061	XLOC_000061	ISCW016232	DS612847:1190671-1191875	ISG	IL	OK	2.73265	7.94809	1.54031	-1.65275	0.0983811	0.207911	no
XLOC_000062	XLOC_000062	ISCW016234	DS612847:1238713-1256448	ISG	IL	OK	1.18668	0.633699	-0.905064	0.897759	0.369314	0.525061	no
XLOC_000063	XLOC_000063	ISCW016235	DS612847:1259894-1269831	ISG	IL	OK	4.68904	5.2036	0.150218	-0.160878	0.872189	0.923651	no
XLOC_000064	XLOC_000064	ISCW016238	DS612847:1285468-1310856	ISG	IL	OK	5.78804	3.16371	-0.871456	0.921245	0.356923	0.513233	no
XLOC_000065	XLOC_000065	ISCW016241	DS612847:1326776-1327304	ISG	IL	OK	35.3924	14.9624	-1.2421	1.31054	0.190014	0.327085	no
XLOC_000066	XLOC_000066	ISCW016242	DS612847:1329485-1332560	ISG	IL	OK	55.7596	51.111	-0.125585	0.131945	0.895028	0.935505	no
XLOC_000067	XLOC_000067	ISCW016244	DS612847:1352153-1364570	ISG	IL	OK	25.4411	4.73239	-2.42652	2.52065	0.0117138	0.0608688	no
XLOC_000068	XLOC_000068	ISCW016245	DS612847:1366059-1367414	ISG	IL	OK	20.5964	32.7426	0.668775	-0.675062	0.499637	0.648448	no
XLOC_000069	XLOC_000069	ISCW016247	DS612847:1394646-1395672	ISG	IL	OK	23.2153	7.6081	-1.60947	1.69024	0.0909814	0.195004	no
XLOC_000070	XLOC_000070	ISCW016249	DS612847:1462922-1470806	ISG	IL	OK	0	28.2254	1.79769e+308	1.79769e+308	0.0194737	0.0705669	no
XLOC_000071	XLOC_000071	ISCW016251	DS612847:1484460-1485648	ISG	IL	OK	15.1857	24.8893	0.712813	-0.73257	0.46382	0.61448	no
XLOC_000072	XLOC_000072	ISCW016252	DS612847:1499534-1511072	ISG	IL	NOTEST	0.522437	1.32518	1.34286	-1.3775	0.168359	1	no
XLOC_000073	XLOC_000073	ISCW016254	DS612847:1537538-1543438	ISG	IL	OK	131.61	172.449	0.389897	-0.38855	0.697609	0.805963	no
XLOC_000074	XLOC_000074	ISCW016256	DS612847:1561358-1575188	ISG	IL	OK	16.1708	14.9428	-0.113943	0.117008	0.906854	0.943289	no
XLOC_000075	XLOC_000075	ISCW016258	DS612847:1592308-1595609	ISG	IL	OK	3.40813	0	-1.79769e+308	-1.79769e+308	0.0416323	0.11081	no
XLOC_000076	XLOC_000076	ISCW016259	DS612847:1601206-1622571	ISG	IL	OK	77.9848	15.9523	-2.28943	2.3799	0.0173172	0.0683921	no
XLOC_000077	XLOC_000077	ISCW016260	DS612847:1624189-1625820	ISG	IL	OK	8.56838	12.9369	0.594402	-0.616416	0.53762	0.681679	no
XLOC_000078	XLOC_000078	-	DS612847:1635056-1662422	ISG	IL	NOTEST	0	0	0	0	1	1	no
XLOC_000079	XLOC_000079	ISCW016202	DS612847:443-13656	ISG	IL	NOTEST	0	0	0	0	1	1	no
XLOC_000080	XLOC_000080	ISCW016203	DS612847:19707-48586	ISG	IL	NOTEST	0	0	0	0	1	1	no
XLOC_000081	XLOC_000081	-	DS612847:261582-261655	ISG	IL	NOTEST	0	0	0	0	1	1	no
XLOC_000082	XLOC_000082	ISCW016209	DS612847:326390-330290	ISG	IL	NOTEST	0.13609	0.230133	0.757901	-0.371469	0.710288	1	no
XLOC_000083	XLOC_000083	ISCW016212	DS612847:483919-548483	ISG	IL	OK	1.39161	1.67005	0.263136	-0.282517	0.777547	0.861612	no
XLOC_000084	XLOC_000084	ISCW016216	DS612847:712581-734921	ISG	IL	OK	40.8641	6.16985	-2.72753	2.82278	0.0047609	0.0319353	yes
XLOC_000085	XLOC_000085	ISCW016218	DS612847:744125-744788	ISG	IL	OK	8.5079	7.84751	-0.116568	0.114162	0.909109	0.944436	no
XLOC_000086	XLOC_000086	ISCW016219	DS612847:759925-779575	ISG	IL	OK	53.0666	7.00605	-2.92113	2.96799	0.00299758	0.0232922	yes
XLOC_000087	XLOC_000087	ISCW016220	DS612847:842784-843414	ISG	IL	OK	36.3822	42.7609	0.233059	-0.240564	0.809893	0.884083	no
XLOC_000088	XLOC_000088	ISCW016221	DS612847:846452-864663	ISG	IL	OK	20.0518	33.0674	0.721681	-0.743983	0.456887	0.608316	no
XLOC_000089	XLOC_000089	ISCW016225	DS612847:905608-917703	ISG	IL	OK	8.39023	1.74311	-2.26705	2.33244	0.0196776	0.0709693	no
XLOC_000090	XLOC_000090	ISCW016227	DS612847:947340-969249	ISG	IL	OK	26.293	6.43889	-2.0298	2.03348	0.0420043	0.11164	no
XLOC_000091	XLOC_000091	ISCW016228	DS612847:999120-1031184	ISG	IL	OK	1.33248	0.273122	-2.28649	2.34307	0.0191257	0.0705669	no
XLOC_000092	XLOC_000092	ISCW016229	DS612847:1035426-1042332	ISG	IL	OK	16.37	4.50639	-1.86101	1.94877	0.0513231	0.130776	no
XLOC_000093	XLOC_000093	ISCW016230	DS612847:1146440-1147043	ISG	IL	OK	170.88	755.567	2.14458	-2.04935	0.0404277	0.11081	no
XLOC_000094	XLOC_000094	ISCW016231	DS612847:1182010-1188460	ISG	IL	OK	9.29848	6.57548	-0.499897	0.533985	0.593352	0.728432	no
XLOC_000095	XLOC_000095	ISCW016233	DS612847:1203023-1222461	ISG	IL	OK	9.50537	2.4729	-1.94254	2.03324	0.0420287	0.11164	no
XLOC_000096	XLOC_000096	ISCW016236	DS612847:1259894-1269831	ISG	IL	OK	0.375754	2.17855	2.53551	-2.61054	0.0090399	0.0507234	no
XLOC_000097	XLOC_000097	ISCW016237	DS612847:1275622-1277857	ISG	IL	OK	2.47046	0.817359	-1.59574	1.65921	0.0970741	0.20549	no
XLOC_000098	XLOC_000098	ISCW016239	DS612847:1313027-1316210	ISG	IL	OK	1.40324	1.89834	0.435973	-0.415094	0.678073	0.793391	no
XLOC_000099	XLOC_000099	ISCW016240	DS612847:1320266-1322674	ISG	IL	NOTEST	0.639864	0	-1.79769e+308	-1.79769e+308	0.158655	1	no
XLOC_000100	XLOC_000100	ISCW016243	DS612847:1333046-1350874	ISG	IL	OK	31.6693	79.5226	1.32828	-1.29039	0.196916	0.335827	no
XLOC_000101	XLOC_000101	ISCW016246	DS612847:1371373-1371568	ISG	IL	OK	48.3963	8.18395	-2.56403	1.60249	0.109047	0.224818	no
XLOC_000102	XLOC_000102	ISCW016248	DS612847:1440747-1442855	ISG	IL	OK	2.08447	10.5747	2.34286	-2.36319	0.0181182	0.0699186	no
XLOC_000103	XLOC_000103	ISCW016250	DS612847:1473016-1481318	ISG	IL	OK	20.3706	12.7693	-0.673815	0.708386	0.478706	0.628466	no
XLOC_000104	XLOC_000104	ISCW016253	DS612847:1516123-1537073	ISG	IL	OK	8.42442	6.73681	-0.322512	0.336946	0.736157	0.832232	no
XLOC_000105	XLOC_000105	ISCW016255	DS612847:1547921-1554679	ISG	IL	OK	25.8699	3.56078	-2.86101	2.91234	0.00358728	0.0262221	yes
XLOC_000106	XLOC_000106	ISCW016257	DS612847:1576688-1589322	ISG	IL	OK	8.45854	18.9391	1.16288	-1.19708	0.231276	0.377474	no
XLOC_000107	XLOC_000107	ISCW016261	DS612847:1635056-1662422	ISG	IL	OK	7.48387	0.35902	-4.38165	4.38708	1.14882e-05	0.000414332	yes
XLOC_000108	XLOC_000108	ISCW000121	DS612897:30271-30496	ISG	IL	OK	2.8377	0	-1.79769e+308	-1.79769e+308	0.158655	0.285968	no
XLOC_000109	XLOC_000109	ISCW000122	DS612897:30529-31096	ISG	IL	OK	152.877	52.8324	-1.53288	1.54224	0.123016	0.24584	no
XLOC_000110	XLOC_000110	ISCW000123	DS612897:32029-59635	ISG	IL	NOTEST	0.513313	0.186006	-1.46449	1.3654	0.172128	1	no
XLOC_000111	XLOC_000111	ISCW000128	DS612897:81786-109149	ISG	IL	OK	6.53988	3.37766	-0.953239	0.987459	0.323418	0.478679	no
XLOC_000112	XLOC_000112	ISCW000131	DS612897:152669-153041	ISG	IL	OK	164.299	422.79	1.36362	-1.46196	0.143753	0.277232	no
XLOC_000113	XLOC_000113	ISCW000133	DS612897:160064-165309	ISG	IL	OK	4.30956	7.2876	0.757901	-0.812193	0.416681	0.5726	no
XLOC_000114	XLOC_000114	-	DS612897:191627-191713	ISG	IL	NOTEST	0	0	0	0	1	1	no
XLOC_000115	XLOC_000115	ISCW000142	DS612897:399321-402035	ISG	IL	NOTEST	0.340311	0	-1.79769e+308	-1.79769e+308	0.158655	1	no
XLOC_000116	XLOC_000116	ISCW000143	DS612897:403320-410748	ISG	IL	OK	0.887037	3.00001	1.7579	-1.75077	0.0799856	0.178093	no
XLOC_000117	XLOC_000117	ISCW000124	DS612897:66900-69872	ISG	IL	OK	18.7746	19.049	0.0209353	-0.0223407	0.982176	0.989567	no
XLOC_000118	XLOC_000118	ISCW000125	DS612897:76578-79560	ISG	IL	OK	8919.53	12975.1	0.54071	-0.408533	0.682882	0.796256	no
XLOC_000119	XLOC_000119	ISCW000126	DS612897:79585-80368	ISG	IL	OK	687.171	470.382	-0.546837	0.493927	0.621358	0.748095	no
XLOC_000120	XLOC_000120	ISCW000127	DS612897:80387-80753	ISG	IL	OK	5.83537	0	-1.79769e+308	-1.79769e+308	0.158655	0.285968	no
XLOC_000121	XLOC_000121	ISCW000129	DS612897:111435-111594	ISG	IL	OK	11.3064	650.063	5.84536	-3.687	0.000226913	0.00361453	yes
XLOC_000122	XLOC_000122	ISCW000130	DS612897:112844-149618	ISG	IL	OK	13.4912	4.83935	-1.47914	1.50892	0.131318	0.258511	no
XLOC_000123	XLOC_000123	ISCW000132	DS612897:154474-159311	ISG	IL	OK	6.54774	4.1009	-0.675059	0.70661	0.479809	0.628906	no
XLOC_000124	XLOC_000124	ISCW000134	DS612897:167337-170189	ISG	IL	OK	4.71806	2.45489	-0.942539	0.981624	0.326285	0.481617	no
XLOC_000125	XLOC_000125	ISCW000135	DS612897:182816-188172	ISG	IL	OK	24.0924	1.69754	-3.82706	3.14804	0.00164368	0.0148801	yes
XLOC_000126	XLOC_000126	ISCW000137	DS612897:201044-303889	ISG	IL	OK	1.43756	0.205021	-2.80978	2.86248	0.00420342	0.0292597	yes
XLOC_000127	XLOC_000127	ISCW000139	DS612897:340995-341343	ISG	IL	OK	18.5627	9.15543	-1.01971	1.04988	0.293772	0.448877	no
XLOC_000128	XLOC_000128	ISCW000140	DS612897:344671-368433	ISG	IL	OK	9.98478	2.03428	-2.29521	2.37681	0.0174629	0.0687547	no
XLOC_000129	XLOC_000129	ISCW000141	DS612897:373358-398475	ISG	IL	OK	29.1305	4.6254	-2.65488	2.72167	0.00649536	0.0396463	yes
XLOC_000130	XLOC_000130	ISCW000757	DS613017:9622-9936	ISG	IL	NOTEST	0	0	0	0	1	1	no
XLOC_000131	XLOC_000131	ISCW001776	DS613042:1937-2530	ISG	IL	NOTEST	0	0	0	0	1	1	no
XLOC_000132	XLOC_000132	ISCW001777	DS613042:6567-25474	ISG	IL	NOTEST	0	0	0	0	1	1	no
XLOC_000133	XLOC_000133	ISCW015815	DS613074:97719-113357	ISG	IL	NOTEST	0	0	0	0	1	1	no
XLOC_000134	XLOC_000134	ISCW015816	DS613074:302373-333909	ISG	IL	NOTEST	0	0	0	0	1	1	no
XLOC_000135	XLOC_000135	-	DS613074:302373-333909	ISG	IL	NOTEST	0	0	0	0	1	1	no
XLOC_000136	XLOC_000136	ISCW000088	DS613121:52025-52107	ISG	IL	NOTEST	0	0	0	0	1	1	no
XLOC_000137	XLOC_000137	ISCW000075	DS613126:250037-251051	ISG	IL	NOTEST	0	0	0	0	1	1	no
XLOC_000138	XLOC_000138	ISCW001644	DS613145:26594-26999	ISG	IL	OK	0.552782	7.47816	3.7579	-2.34448	0.0190534	0.0705669	no
XLOC_000139	XLOC_000139	ISCW001645	DS613145:47266-56398	ISG	IL	OK	1.4422	67.88	5.55664	-5.39412	6.88596e-08	7.05135e-06	yes
XLOC_000140	XLOC_000140	ISCW001646	DS613145:77140-77891	ISG	IL	OK	2.26747	3.83436	0.757901	-0.371469	0.710288	0.812031	no
XLOC_000141	XLOC_000141	-	DS613210:26228-26301	ISG	IL	NOTEST	0	0	0	0	1	1	no
XLOC_000142	XLOC_000142	ISCW015683	DS613210:26464-28172	ISG	IL	NOTEST	0	0	0	0	1	1	no
XLOC_000143	XLOC_000143	ISCW015686	DS613210:122342-171706	ISG	IL	NOTEST	0.501346	0.605564	0.272474	-0.260683	0.794337	1	no
XLOC_000144	XLOC_000144	ISCW015689	DS613210:427346-432084	ISG	IL	NOTEST	0.618292	0	-1.79769e+308	-1.79769e+308	0.158655	1	no
XLOC_000145	XLOC_000145	ISCW015690	DS613210:498551-535648	ISG	IL	OK	10.2688	6.01529	-0.771567	0.804986	0.420828	0.577148	no
XLOC_000146	XLOC_000146	ISCW015681	DS613210:25818-25891	ISG	IL	NOTEST	0	0	0	0	1	1	no
XLOC_000147	XLOC_000147	-	DS613210:68990-69065	ISG	IL	NOTEST	0	0	0	0	1	1	no
XLOC_000148	XLOC_000148	-	DS613210:93452-93525	ISG	IL	NOTEST	0	0	0	0	1	1	no
XLOC_000149	XLOC_000149	ISCW015687	DS613210:357966-369401	ISG	IL	NOTEST	0	0	0	0	1	1	no
XLOC_000150	XLOC_000150	ISCW000807	DS613384:4405-4477	ISG	IL	NOTEST	0	0	0	0	1	1	no
XLOC_000151	XLOC_000151	ISCW001205	DS613482:9702-10224	ISG	IL	NOTEST	0	0	0	0	1	1	no
XLOC_000152	XLOC_000152	ISCW001206	DS613482:10281-15465	ISG	IL	NOTEST	0	0	0	0	1	1	no
XLOC_000153	XLOC_000153	ISCW000569	DS613485:4350-12221	ISG	IL	OK	16.0371	16.9495	0.079829	-0.0771518	0.938503	0.963194	no
XLOC_000154	XLOC_000154	ISCW015551	DS613503:130959-131388	ISG	IL	NOTEST	0	0	0	0	1	1	no
XLOC_000155	XLOC_000155	-	DS613503:392925-392998	ISG	IL	NOTEST	0	0	0	0	1	1	no
XLOC_000156	XLOC_000156	ISCW015552	DS613503:219387-219738	ISG	IL	NOTEST	0	0	0	0	1	1	no
XLOC_000157	XLOC_000157	ISCW000769	DS613553:13504-13577	ISG	IL	NOTEST	0	0	0	0	1	1	no
XLOC_000158	XLOC_000158	ISCW000265	DS613557:21774-22113	ISG	IL	NOTEST	0	0	0	0	1	1	no
XLOC_000159	XLOC_000159	ISCW001381	DS613616:247-26870	ISG	IL	NOTEST	0.993799	0.343747	-1.53161	1.05466	0.291582	1	no
XLOC_000160	XLOC_000160	ISCW015693	DS613622:14916-20593	ISG	IL	OK	169.685	14.326	-3.56615	3.62002	0.000294577	0.00435374	yes
XLOC_000161	XLOC_000161	-	DS613622:28623-28695	ISG	IL	NOTEST	0	0	0	0	1	1	no
XLOC_000162	XLOC_000162	ISCW015696	DS613622:29609-32255	ISG	IL	OK	36.049	29.0865	-0.309606	0.310838	0.755923	0.845163	no
XLOC_000163	XLOC_000163	ISCW015698	DS613622:52507-88954	ISG	IL	OK	13.2438	2.70292	-2.29273	2.38152	0.0172413	0.0681863	no
XLOC_000164	XLOC_000164	ISCW015699	DS613622:90403-91222	ISG	IL	NOTEST	0	0	0	0	1	1	no
XLOC_000165	XLOC_000165	ISCW015700	DS613622:94816-119155	ISG	IL	OK	0	2.5931	1.79769e+308	1.79769e+308	0.0185281	0.070178	no
XLOC_000166	XLOC_000166	ISCW015701	DS613622:123664-124522	ISG	IL	NOTEST	0	0.283251	1.79769e+308	1.79769e+308	0.158655	1	no
XLOC_000167	XLOC_000167	ISCW015702	DS613622:133512-135580	ISG	IL	NOTEST	0	0	0	0	1	1	no
XLOC_000168	XLOC_000168	ISCW015703	DS613622:146720-160227	ISG	IL	NOTEST	0	0.173025	1.79769e+308	1.79769e+308	0.158655	1	no
XLOC_000169	XLOC_000169	ISCW015694	DS613622:23682-27493	ISG	IL	OK	2.71357	0.550648	-2.30099	2.16775	0.030178	0.0897826	no
XLOC_000170	XLOC_000170	ISCW015697	DS613622:34340-51894	ISG	IL	OK	19.0879	11.2555	-0.762028	0.769869	0.441378	0.594709	no
XLOC_000171	XLOC_000171	ISCW015704	DS613622:163859-176323	ISG	IL	OK	0	15.6364	1.79769e+308	1.79769e+308	0.0161565	0.0672943	no
XLOC_000172	XLOC_000172	ISCW015705	DS613622:193827-202631	ISG	IL	OK	3.01504	0.566502	-2.41202	1.98004	0.0476992	0.123129	no
XLOC_000173	XLOC_000173	ISCW015706	DS613622:218034-231620	ISG	IL	OK	1.35181	0.761986	-0.827062	0.812542	0.416481	0.572393	no
XLOC_000174	XLOC_000174	ISCW001611	DS613632:35266-39663	ISG	IL	OK	38.4564	32.5155	-0.242099	0.193771	0.846355	0.907957	no
XLOC_000175	XLOC_000175	ISCW000434	DS613650:5246-15435	ISG	IL	NOTEST	0.61177	1.03452	0.757901	-0.525337	0.599349	1	no
XLOC_000176	XLOC_000176	ISCW015603	DS613658:5411-47156	ISG	IL	OK	4.27218	0.129007	-5.04945	3.17997	0.00147289	0.0140071	yes
XLOC_000177	XLOC_000177	ISCW015606	DS613658:227597-228753	ISG	IL	NOTEST	0	0.1942	1.79769e+308	1.79769e+308	0.158655	1	no
XLOC_000178	XLOC_000178	-	DS613658:5411-47156	ISG	IL	NOTEST	0	0	0	0	1	1	no
XLOC_000179	XLOC_000179	ISCW015605	DS613658:141927-153230	ISG	IL	NOTEST	0	0	0	0	1	1	no
XLOC_000180	XLOC_000180	-	DS613689:32012-32085	ISG	IL	NOTEST	0	0	0	0	1	1	no
XLOC_000181	XLOC_000181	ISCW001528	DS613689:11663-21219	ISG	IL	NOTEST	0	0	0	0	1	1	no
XLOC_000182	XLOC_000182	-	DS613729:245389-245461	ISG	IL	NOTEST	0	0	0	0	1	1	no
XLOC_000183	XLOC_000183	ISCW000165	DS613729:184380-184453	ISG	IL	NOTEST	0	0	0	0	1	1	no
XLOC_000184	XLOC_000184	ISCW000531	DS613744:181987-185769	ISG	IL	NOTEST	0	0	0	0	1	1	no
XLOC_000185	XLOC_000185	ISCW000530	DS613744:83746-93222	ISG	IL	NOTEST	0.237707	0.80394	1.7579	-1.40698	0.159432	1	no
XLOC_000186	XLOC_000186	ISCW000746	DS613778:29099-29999	ISG	IL	NOTEST	0	0.532112	1.79769e+308	1.79769e+308	0.0786496	1	no
XLOC_000187	XLOC_000187	ISCW000749	DS613778:80782-82920	ISG	IL	NOTEST	0	0	0	0	1	1	no
XLOC_000188	XLOC_000188	ISCW000745	DS613778:8924-9782	ISG	IL	NOTEST	0	0	0	0	1	1	no
XLOC_000189	XLOC_000189	ISCW000747	DS613778:37856-46298	ISG	IL	NOTEST	0	0	0	0	1	1	no
XLOC_000190	XLOC_000190	ISCW000748	DS613778:55481-67666	ISG	IL	NOTEST	0.23167	0.391761	0.757901	-0.371469	0.710288	1	no
XLOC_000191	XLOC_000191	-	DS613815:121478-133523	ISG	IL	NOTEST	0	0	0	0	1	1	no
XLOC_000192	XLOC_000192	ISCW001336	DS613815:37109-37190	ISG	IL	NOTEST	0	0	0	0	1	1	no
XLOC_000193	XLOC_000193	ISCW001337	DS613815:121478-133523	ISG	IL	OK	25.6387	16.0796	-0.673097	0.71324	0.475697	0.625805	no
XLOC_000194	XLOC_000194	ISCW000395	DS613917:11127-11583	ISG	IL	NOTEST	0	0	0	0	1	1	no
XLOC_000195	XLOC_000195	ISCW016265	DS613933:230094-261868	ISG	IL	OK	15.1033	3.67976	-2.03718	2.12616	0.03349	0.0970431	no
XLOC_000196	XLOC_000196	ISCW016268	DS613933:321198-322073	ISG	IL	NOTEST	0	0	0	0	1	1	no
XLOC_000197	XLOC_000197	ISCW016269	DS613933:366016-366262	ISG	IL	NOTEST	0	0	0	0	1	1	no
XLOC_000198	XLOC_000198	ISCW016270	DS613933:377309-378272	ISG	IL	NOTEST	0.721016	0.243852	-1.56403	0.958219	0.337952	1	no
XLOC_000199	XLOC_000199	ISCW016263	DS613933:7558-7846	ISG	IL	NOTEST	0	0	0	0	1	1	no
XLOC_000200	XLOC_000200	ISCW016264	DS613933:121404-122602	ISG	IL	NOTEST	0	0	0	0	1	1	no
XLOC_000201	XLOC_000201	-	DS613933:230094-261868	ISG	IL	OK	0	235.651	1.79769e+308	1.79769e+308	0.455388	0.607288	no
XLOC_000202	XLOC_000202	-	DS613933:230094-261868	ISG	IL	NOTEST	0	0	0	0	1	1	no
XLOC_000203	XLOC_000203	-	DS613933:422991-423064	ISG	IL	NOTEST	0	0	0	0	1	1	no
XLOC_000204	XLOC_000204	-	DS613933:423689-423761	ISG	IL	NOTEST	0	0	0	0	1	1	no
XLOC_000205	XLOC_000205	-	DS613933:437437-437519	ISG	IL	NOTEST	0	0	0	0	1	1	no
XLOC_000206	XLOC_000206	ISCW001282	DS614008:1699-1874	ISG	IL	NOTEST	0	0	0	0	1	1	no
XLOC_000207	XLOC_000207	ISCW001283	DS614008:60117-61714	ISG	IL	NOTEST	0	0	0	0	1	1	no
XLOC_000208	XLOC_000208	ISCW000050	DS614048:32302-32542	ISG	IL	NOTEST	0	0	0	0	1	1	no
XLOC_000209	XLOC_000209	ISCW000052	DS614048:86650-89233	ISG	IL	NOTEST	0	0	0	0	1	1	no
XLOC_000210	XLOC_000210	ISCW000053	DS614048:106968-107916	ISG	IL	NOTEST	0	0	0	0	1	1	no
XLOC_000211	XLOC_000211	ISCW000051	DS614048:78538-79297	ISG	IL	NOTEST	0.197605	0	-1.79769e+308	-1.79769e+308	0.158655	1	no
XLOC_000212	XLOC_000212	ISCW000710	DS614070:10406-21620	ISG	IL	OK	2.58493	20.3989	2.98029	-2.77863	0.00545879	0.0350935	yes
XLOC_000213	XLOC_000213	-	DS614070:10406-21620	ISG	IL	NOTEST	0	0	0	0	1	1	no
XLOC_000214	XLOC_000214	ISCW000934	DS614073:54-546	ISG	IL	NOTEST	0	0	0	0	1	1	no
XLOC_000215	XLOC_000215	ISCW000906	DS614120:3350-3432	ISG	IL	NOTEST	0	0	0	0	1	1	no
XLOC_000216	XLOC_000216	ISCW000843	DS614225:22353-46279	ISG	IL	OK	34.3518	15.7111	-1.1286	1.12353	0.261211	0.412478	no
XLOC_000217	XLOC_000217	ISCW000842	DS614225:2163-20855	ISG	IL	OK	21.622	25.7298	0.250941	-0.248301	0.803901	0.880186	no
XLOC_000218	XLOC_000218	ISCW001084	DS614241:5246-8526	ISG	IL	NOTEST	0	0	0	0	1	1	no
XLOC_000219	XLOC_000219	ISCW024041	DS614275:91-1102	ISG	IL	NOTEST	0	0	0	0	1	1	no
XLOC_000220	XLOC_000220	ISCW024028	DS614311:320-1418	ISG	IL	OK	943.112	556.686	-0.760566	0.802485	0.422273	0.578067	no
XLOC_000221	XLOC_000221	-	DS614326:4138-59916	ISG	IL	OK	0	108.595	1.79769e+308	1.79769e+308	0.0786496	0.175622	no
XLOC_000222	XLOC_000222	ISCW001196	DS614326:886-2348	ISG	IL	OK	4.16894	7.93102	0.927826	-0.939144	0.347657	0.502604	no
XLOC_000223	XLOC_000223	ISCW001197	DS614326:4138-59916	ISG	IL	OK	26.9658	6.9741	-1.95105	1.96105	0.0498732	0.127507	no
XLOC_000224	XLOC_000224	-	DS614359:383267-506996	ISG	IL	NOTEST	0	0	0	0	1	1	no
XLOC_000225	XLOC_000225	-	DS614359:775423-775514	ISG	IL	NOTEST	0	0	0	0	1	1	no
XLOC_000226	XLOC_000226	ISCW016579	DS614359:190696-267345	ISG	IL	NOTEST	0.581471	0.0702345	-3.04945	1.91415	0.0556006	1	no
XLOC_000227	XLOC_000227	ISCW016580	DS614359:383267-506996	ISG	IL	NOTEST	0.294236	0.165854	-0.827062	0.496471	0.619562	1	no
XLOC_000228	XLOC_000228	ISCW001688	DS614373:102095-134668	ISG	IL	NOTEST	0.368531	0	-1.79769e+308	-1.79769e+308	0.0293909	1	no
XLOC_000229	XLOC_000229	ISCW024006	DS614437:744-1281	ISG	IL	NOTEST	0	0	0	0	1	1	no
XLOC_000230	XLOC_000230	ISCW001624	DS614438:1346-5276	ISG	IL	NOTEST	0	0	0	0	1	1	no
XLOC_000231	XLOC_000231	ISCW001625	DS614438:67623-110767	ISG	IL	NOTEST	0	0	0	0	1	1	no
XLOC_000232	XLOC_000232	ISCW001406	DS614450:22951-23164	ISG	IL	NOTEST	0	0	0	0	1	1	no
XLOC_000233	XLOC_000233	ISCW001407	DS614450:48683-75458	ISG	IL	OK	0.230201	1.94638	3.07983	-1.88689	0.0591748	0.145545	no
XLOC_000234	XLOC_000234	-	DS614450:104286-104359	ISG	IL	NOTEST	0	0	0	0	1	1	no
XLOC_000235	XLOC_000235	ISCW001408	DS614450:93974-94160	ISG	IL	OK	0	19.7355	1.79769e+308	1.79769e+308	0.0786496	0.175622	no
XLOC_000236	XLOC_000236	ISCW000758	DS614469:535-13613	ISG	IL	NOTEST	0	0	0	0	1	1	no
XLOC_000237	XLOC_000237	ISCW001789	DS614477:10074-36227	ISG	IL	OK	7.31591	16.9845	1.21511	-1.28516	0.198738	0.338229	no
XLOC_000238	XLOC_000238	ISCW001795	DS614477:150626-166829	ISG	IL	OK	250.909	97.0662	-1.37012	1.18456	0.236193	0.38442	no
XLOC_000239	XLOC_000239	ISCW001798	DS614477:224368-284835	ISG	IL	OK	28.1482	12.8431	-1.13205	1.1201	0.262669	0.412792	no
XLOC_000240	XLOC_000240	ISCW001799	DS614477:302447-305958	ISG	IL	OK	10.2279	25.6599	1.32701	-1.32289	0.185871	0.321435	no
XLOC_000241	XLOC_000241	ISCW001790	DS614477:42046-65242	ISG	IL	OK	4.31913	2.73892	-0.657137	0.684428	0.493705	0.642713	no
XLOC_000242	XLOC_000242	ISCW001791	DS614477:71653-88198	ISG	IL	NOTEST	0	0	0	0	1	1	no
XLOC_000243	XLOC_000243	ISCW001793	DS614477:96691-100812	ISG	IL	OK	4.29192	0.907221	-2.2421	1.3988	0.161872	0.288278	no
XLOC_000244	XLOC_000244	ISCW001794	DS614477:106492-130538	ISG	IL	OK	17.2389	2.86924	-2.58693	2.68228	0.00731229	0.0434757	yes
XLOC_000245	XLOC_000245	ISCW001796	DS614477:150626-166829	ISG	IL	OK	306.427	1648.99	2.42797	-2.28209	0.0224838	0.0762482	no
XLOC_000246	XLOC_000246	ISCW001797	DS614477:179694-221725	ISG	IL	OK	24.3609	19.6196	-0.312268	0.306073	0.759549	0.848137	no
XLOC_000247	XLOC_000247	-	DS614477:339203-339285	ISG	IL	NOTEST	0	0	0	0	1	1	no
XLOC_000248	XLOC_000248	ISCW024023	DS614519:1634-4813	ISG	IL	OK	17.4997	89.455	2.35383	-2.36766	0.017901	0.0693894	no
XLOC_000249	XLOC_000249	ISCW000809	DS614607:139947-140020	ISG	IL	NOTEST	0	0	0	0	1	1	no
XLOC_000250	XLOC_000250	ISCW000810	DS614607:177452-177758	ISG	IL	NOTEST	0	0	0	0	1	1	no
XLOC_000251	XLOC_000251	ISCW001358	DS614609:34696-34769	ISG	IL	NOTEST	0	0	0	0	1	1	no
XLOC_000252	XLOC_000252	ISCW016468	DS614862:1717-4651	ISG	IL	OK	45.8958	51.8727	0.176614	-0.180006	0.857148	0.914392	no
XLOC_000253	XLOC_000253	ISCW016470	DS614862:47017-57085	ISG	IL	OK	142.131	19.1063	-2.89509	2.8378	0.00454258	0.0307913	yes
XLOC_000254	XLOC_000254	ISCW016471	DS614862:64221-66583	ISG	IL	OK	7.88407	6.75156	-0.223721	0.231701	0.81677	0.888171	no
XLOC_000255	XLOC_000255	ISCW016472	DS614862:77531-82106	ISG	IL	OK	52.0373	29.8775	-0.800487	0.774493	0.438639	0.593529	no
XLOC_000256	XLOC_000256	ISCW016474	DS614862:87190-93199	ISG	IL	OK	17.2264	5.17238	-1.73572	1.70546	0.0881094	0.191134	no
XLOC_000257	XLOC_000257	ISCW016469	DS614862:21342-40356	ISG	IL	OK	42.0543	12.3569	-1.76694	1.77514	0.0758752	0.175622	no
XLOC_000258	XLOC_000258	ISCW016473	DS614862:85732-86341	ISG	IL	OK	78.5776	229.515	1.5464	-1.62768	0.103593	0.216453	no
XLOC_000259	XLOC_000259	ISCW016475	DS614862:94371-103445	ISG	IL	OK	250.81	271.719	0.115522	-0.108194	0.913842	0.94755	no
XLOC_000260	XLOC_000260	ISCW016476	DS614862:112654-116315	ISG	IL	OK	184.533	240.844	0.384222	-0.394652	0.6931	0.802621	no
XLOC_000261	XLOC_000261	-	DS614908:43255-43328	ISG	IL	NOTEST	0	0	0	0	1	1	no
XLOC_000262	XLOC_000262	ISCW015607	DS614908:42608-42681	ISG	IL	NOTEST	0	0	0	0	1	1	no
XLOC_000263	XLOC_000263	ISCW015723	DS614935:3112-3980	ISG	IL	OK	18.9045	12.7872	-0.564027	0.442668	0.658006	0.778328	no
XLOC_000264	XLOC_000264	ISCW001480	DS615044:9760-17011	ISG	IL	NOTEST	0	0	0	0	1	1	no
XLOC_000265	XLOC_000265	ISCW016103	DS615069:5155-8232	ISG	IL	NOTEST	0	0	0	0	1	1	no
XLOC_000266	XLOC_000266	ISCW016104	DS615069:17021-23765	ISG	IL	NOTEST	0	0	0	0	1	1	no
XLOC_000267	XLOC_000267	ISCW016108	DS615069:99107-124803	ISG	IL	OK	5.76135	7.56334	0.392616	-0.402865	0.687048	0.79892	no
XLOC_000268	XLOC_000268	ISCW016111	DS615069:145554-155206	ISG	IL	OK	412.952	198.166	-1.05926	0.986287	0.323992	0.479405	no
XLOC_000269	XLOC_000269	ISCW016113	DS615069:169962-211384	ISG	IL	OK	12.0489	4.0466	-1.57412	1.6221	0.104783	0.218262	no
XLOC_000270	XLOC_000270	ISCW016115	DS615069:216145-216743	ISG	IL	OK	137.71	279.445	1.02094	-1.06887	0.285127	0.439179	no
XLOC_000271	XLOC_000271	ISCW016105	DS615069:31286-36363	ISG	IL	OK	267.249	111.919	-1.25573	1.2456	0.212913	0.35308	no
XLOC_000272	XLOC_000272	ISCW016106	DS615069:37096-60631	ISG	IL	OK	312.638	74.6484	-2.06631	1.8776	0.0604366	0.148051	no
XLOC_000273	XLOC_000273	ISCW016107	DS615069:96585-97903	ISG	IL	OK	21.3811	39.1415	0.87236	-0.87825	0.379808	0.535664	no
XLOC_000274	XLOC_000274	ISCW016109	DS615069:125897-128393	ISG	IL	OK	7.67012	12.9704	0.757901	-0.371469	0.710288	0.812031	no
XLOC_000275	XLOC_000275	ISCW016110	DS615069:130563-139722	ISG	IL	OK	3.93271	1.24694	-1.65714	1.5514	0.120806	0.242267	no
XLOC_000276	XLOC_000276	ISCW016112	DS615069:158904-168172	ISG	IL	OK	1220.91	2260.56	0.88872	-0.725002	0.468451	0.618543	no
XLOC_000277	XLOC_000277	ISCW016114	DS615069:212454-215400	ISG	IL	OK	15.7445	1.14296	-3.78399	3.86095	0.000112947	0.00223729	yes
XLOC_000278	XLOC_000278	ISCW016116	DS615069:221109-228589	ISG	IL	OK	36.7376	24.487	-0.585244	0.595499	0.55151	0.693745	no
XLOC_000279	XLOC_000279	-	DS615078:782733-862605	ISG	IL	NOTEST	0	0	0	0	1	1	no
XLOC_000280	XLOC_000280	ISCW015735	DS615078:157171-157552	ISG	IL	NOTEST	0	0	0	0	1	1	no
XLOC_000281	XLOC_000281	ISCW015737	DS615078:555866-556574	ISG	IL	NOTEST	0	1.81444	1.79769e+308	1.79769e+308	0.0786496	1	no
XLOC_000282	XLOC_000282	ISCW015738	DS615078:593553-593786	ISG	IL	NOTEST	0	0	0	0	1	1	no
XLOC_000283	XLOC_000283	ISCW015739	DS615078:619197-714709	ISG	IL	NOTEST	0	0	0	0	1	1	no
XLOC_000284	XLOC_000284	ISCW015741	DS615078:782733-862605	ISG	IL	NOTEST	0.594893	0.431135	-0.464492	0.423402	0.672002	1	no
XLOC_000285	XLOC_000285	ISCW015744	DS615078:896073-896436	ISG	IL	NOTEST	0	0	0	0	1	1	no
XLOC_000286	XLOC_000286	ISCW015745	DS615078:914657-916168	ISG	IL	NOTEST	0	0	0	0	1	1	no
XLOC_000287	XLOC_000287	ISCW015746	DS615078:967092-967265	ISG	IL	NOTEST	0	0	0	0	1	1	no
XLOC_000288	XLOC_000288	ISCW000821	DS615166:170-10663	ISG	IL	NOTEST	0.513753	0	-1.79769e+308	-1.79769e+308	0.158655	1	no
XLOC_000289	XLOC_000289	ISCW001744	DS615231:26431-35793	ISG	IL	NOTEST	0	0	0	0	1	1	no
XLOC_000290	XLOC_000290	ISCW001119	DS615299:1211-24286	ISG	IL	OK	0.382451	4.95831	3.6965	-3.47657	0.000507871	0.00655627	yes
XLOC_000291	XLOC_000291	ISCW000976	DS615309:6995-7067	ISG	IL	NOTEST	0	0	0	0	1	1	no
XLOC_000292	XLOC_000292	ISCW001155	DS615345:130503-130704	ISG	IL	NOTEST	0	0	0	0	1	1	no
XLOC_000293	XLOC_000293	ISCW001156	DS615345:179097-180501	ISG	IL	NOTEST	0	0	0	0	1	1	no
XLOC_000294	XLOC_000294	ISCW001157	DS615345:184528-281224	ISG	IL	NOTEST	0.580659	1.47287	1.34286	-1.28124	0.200108	1	no
XLOC_000295	XLOC_000295	ISCW001154	DS615345:87189-93917	ISG	IL	NOTEST	0.169837	0.143599	-0.242099	0.137017	0.891018	1	no
XLOC_000296	XLOC_000296	-	DS615345:184528-281224	ISG	IL	NOTEST	0	0	0	0	1	1	no
XLOC_000297	XLOC_000297	ISCW016096	DS615387:115210-208588	ISG	IL	NOTEST	0	0	0	0	1	1	no
XLOC_000298	XLOC_000298	ISCW016102	DS615387:1103756-1106228	ISG	IL	NOTEST	0	1.28627	1.79769e+308	1.79769e+308	0.0194336	1	no
XLOC_000299	XLOC_000299	-	DS615387:406468-406540	ISG	IL	NOTEST	0	0	0	0	1	1	no
XLOC_000300	XLOC_000300	ISCW016099	DS615387:410006-495085	ISG	IL	OK	0.314964	4.46063	3.82399	-3.95905	7.52478e-05	0.00165184	yes
XLOC_000301	XLOC_000301	ISCW016100	DS615387:561657-1070788	ISG	IL	NOTEST	0.471366	1.19564	1.34286	-1.01964	0.307898	1	no
XLOC_000302	XLOC_000302	ISCW000417	DS615400:968-1050	ISG	IL	NOTEST	0	0	0	0	1	1	no
XLOC_000303	XLOC_000303	ISCW000062	DS615409:6924-22052	ISG	IL	NOTEST	0	0.202533	1.79769e+308	1.79769e+308	0.158655	1	no
XLOC_000304	XLOC_000304	ISCW000061	DS615409:760-1310	ISG	IL	NOTEST	0	0	0	0	1	1	no
XLOC_000305	XLOC_000305	-	DS615409:6924-22052	ISG	IL	NOTEST	0	0	0	0	1	1	no
XLOC_000306	XLOC_000306	ISCW000274	DS615439:137292-147996	ISG	IL	NOTEST	0.552782	0	-1.79769e+308	-1.79769e+308	0.158655	1	no
XLOC_000307	XLOC_000307	ISCW000275	DS615439:186181-193186	ISG	IL	NOTEST	1.05692	1.05134	-0.00763387	0.0079363	0.993668	1	no
XLOC_000308	XLOC_000308	ISCW000276	DS615439:199969-200461	ISG	IL	OK	2.68429	2.59383	-0.049454	0.048727	0.961137	0.97519	no
XLOC_000309	XLOC_000309	ISCW024042	DS615543:1658-2897	ISG	IL	OK	0	5.52476	1.79769e+308	1.79769e+308	0.0288898	0.0878738	no
XLOC_000310	XLOC_000310	ISCW000947	DS615613:303-11060	ISG	IL	OK	17.528	197.603	3.49487	-3.6525	0.000259701	0.00401571	yes
XLOC_000311	XLOC_000311	ISCW000948	DS615613:46599-48655	ISG	IL	OK	2.41993	0	-1.79769e+308	-1.79769e+308	0.0416323	0.11081	no
XLOC_000312	XLOC_000312	ISCW000153	DS615618:20472-34490	ISG	IL	NOTEST	0	0.255558	1.79769e+308	1.79769e+308	0.0416323	1	no
XLOC_000313	XLOC_000313	ISCW000155	DS615618:163340-165747	ISG	IL	NOTEST	0	1.18284	1.79769e+308	1.79769e+308	0.0416323	1	no
XLOC_000314	XLOC_000314	ISCW000154	DS615618:37965-38211	ISG	IL	NOTEST	0	0	0	0	1	1	no
XLOC_000315	XLOC_000315	ISCW024061	DS615644:1189-1390	ISG	IL	OK	0	7.2791	1.79769e+308	1.79769e+308	0.158655	0.285968	no
XLOC_000316	XLOC_000316	-	DS615761:104815-323804	ISG	IL	NOTEST	0	0	0	0	1	1	no
XLOC_000317	XLOC_000317	ISCW016578	DS615761:426689-459292	ISG	IL	OK	7.01279	1.69412	-2.04945	2.14044	0.0323195	0.094227	no
XLOC_000318	XLOC_000318	ISCW016573	DS615761:104815-323804	ISG	IL	NOTEST	0.92376	0.669473	-0.464492	0.423402	0.672002	1	no
XLOC_000319	XLOC_000319	ISCW000529	DS615774:928-2863	ISG	IL	NOTEST	0	0	0	0	1	1	no
XLOC_000320	XLOC_000320	ISCW016411	DS615776:62868-63111	ISG	IL	NOTEST	0	0	0	0	1	1	no
XLOC_000321	XLOC_000321	ISCW016412	DS615776:65413-68815	ISG	IL	NOTEST	0.225901	0	-1.79769e+308	-1.79769e+308	0.158655	1	no
XLOC_000322	XLOC_000322	ISCW016413	DS615776:85385-88705	ISG	IL	OK	40.1625	29.473	-0.446458	0.477178	0.633235	0.758493	no
XLOC_000323	XLOC_000323	ISCW016201	DS615850:41136-41729	ISG	IL	OK	3.1112	116.223	5.22328	-5.33062	9.78773e-08	9.59449e-06	yes
XLOC_000324	XLOC_000324	ISCW000951	DS615864:17250-19492	ISG	IL	OK	4525.23	7773.12	0.780502	-0.722601	0.469925	0.620056	no
XLOC_000325	XLOC_000325	ISCW000953	DS615864:39419-41576	ISG	IL	OK	2.51348	2.83358	0.172938	-0.185595	0.852763	0.912205	no
XLOC_000326	XLOC_000326	ISCW000950	DS615864:3232-10905	ISG	IL	NOTEST	0	0.351379	1.79769e+308	1.79769e+308	0.158655	1	no
XLOC_000327	XLOC_000327	ISCW000952	DS615864:35411-37565	ISG	IL	OK	3.07677	2.17576	-0.499897	0.533985	0.593352	0.728432	no
XLOC_000328	XLOC_000328	ISCW000954	DS615864:48108-70776	ISG	IL	OK	39.3055	58.8507	0.582329	-0.608729	0.542704	0.686625	no
XLOC_000329	XLOC_000329	ISCW001714	DS615890:3519-45425	ISG	IL	NOTEST	0	0	0	0	1	1	no
XLOC_000330	XLOC_000330	ISCW001749	DS615902:157-29837	ISG	IL	NOTEST	0.120223	0	-1.79769e+308	-1.79769e+308	0.0786496	1	no
XLOC_000331	XLOC_000331	ISCW001034	DS615930:37038-76450	ISG	IL	OK	3.76986	0.335523	-3.49003	3.2775	0.00104732	0.0110707	yes
XLOC_000332	XLOC_000332	ISCW001162	DS615994:113673-114003	ISG	IL	NOTEST	0	0	0	0	1	1	no
XLOC_000333	XLOC_000333	ISCW000269	DS616024:13414-29169	ISG	IL	NOTEST	0	0	0	0	1	1	no
XLOC_000334	XLOC_000334	ISCW000301	DS616086:40997-44584	ISG	IL	OK	5.44429	1.20084	-2.1807	2.05095	0.0402714	0.11081	no
XLOC_000335	XLOC_000335	ISCW000302	DS616086:54927-75748	ISG	IL	OK	3.95186	2.20461	-0.842012	0.89067	0.373106	0.529115	no
XLOC_000336	XLOC_000336	ISCW000304	DS616086:81462-84750	ISG	IL	NOTEST	0	0	0	0	1	1	no
XLOC_000337	XLOC_000337	ISCW000305	DS616086:98099-152788	ISG	IL	OK	5.68401	8.27685	0.542172	-0.574687	0.565503	0.705275	no
XLOC_000338	XLOC_000338	ISCW001293	DS616147:482-13820	ISG	IL	NOTEST	0	0	0	0	1	1	no
XLOC_000339	XLOC_000339	ISCW016139	DS616177:8598-8789	ISG	IL	NOTEST	0	0	0	0	1	1	no
XLOC_000340	XLOC_000340	ISCW016142	DS616177:725688-845237	ISG	IL	NOTEST	0	0	0	0	1	1	no
XLOC_000341	XLOC_000341	-	DS616177:224550-224623	ISG	IL	NOTEST	0	0	0	0	1	1	no
XLOC_000342	XLOC_000342	-	DS616177:388231-388313	ISG	IL	NOTEST	0	0	0	0	1	1	no
XLOC_000343	XLOC_000343	-	DS616177:725688-845237	ISG	IL	NOTEST	0	0	0	0	1	1	no
XLOC_000344	XLOC_000344	ISCW000621	DS616181:19964-43574	ISG	IL	OK	150.501	128.54	-0.227547	0.197018	0.843813	0.907596	no
XLOC_000345	XLOC_000345	ISCW000620	DS616181:4659-4944	ISG	IL	NOTEST	0	0	0	0	1	1	no
XLOC_000346	XLOC_000346	ISCW000622	DS616181:19964-43574	ISG	IL	OK	270.668	1142.93	2.07815	-1.65335	0.0982596	0.207726	no
XLOC_000347	XLOC_000347	ISCW015907	DS616194:6452-9082	ISG	IL	NOTEST	0	0	0	0	1	1	no
XLOC_000348	XLOC_000348	ISCW015910	DS616194:28207-31512	ISG	IL	OK	19.0512	74.0018	1.95768	-1.86799	0.0617629	0.150675	no
XLOC_000349	XLOC_000349	ISCW015914	DS616194:104212-110396	ISG	IL	NOTEST	0	0	0	0	1	1	no
XLOC_000350	XLOC_000350	ISCW015909	DS616194:17430-21598	ISG	IL	OK	252.42	170.74	-0.564027	0.544091	0.586379	0.723059	no
XLOC_000351	XLOC_000351	ISCW015911	DS616194:31538-50064	ISG	IL	OK	12.7233	1.37479	-3.21019	3.30769	0.00094069	0.010236	yes
XLOC_000352	XLOC_000352	ISCW015912	DS616194:56941-57400	ISG	IL	OK	1.30174	0	-1.79769e+308	-1.79769e+308	0.0416323	0.11081	no
XLOC_000353	XLOC_000353	ISCW015913	DS616194:82228-88301	ISG	IL	NOTEST	0.492843	0	-1.79769e+308	-1.79769e+308	0.158655	1	no
XLOC_000354	XLOC_000354	ISCW000877	DS616205:88036-88348	ISG	IL	NOTEST	0	0	0	0	1	1	no
XLOC_000355	XLOC_000355	ISCW001671	DS616231:8138-12766	ISG	IL	NOTEST	0.367917	0.622157	0.757901	-0.371469	0.710288	1	no
XLOC_000356	XLOC_000356	ISCW000249	DS616232:6483-8361	ISG	IL	NOTEST	0	0	0	0	1	1	no
XLOC_000357	XLOC_000357	ISCW016129	DS616267:125223-126042	ISG	IL	NOTEST	0	0	0	0	1	1	no
XLOC_000358	XLOC_000358	ISCW016130	DS616267:138490-139465	ISG	IL	NOTEST	0	0.240036	1.79769e+308	1.79769e+308	0.158655	1	no
XLOC_000359	XLOC_000359	ISCW016545	DS616312:18489-56079	ISG	IL	NOTEST	0	0	0	0	1	1	no
XLOC_000360	XLOC_000360	ISCW001238	DS616371:39905-52238	ISG	IL	NOTEST	0.125717	0.212591	0.757901	-0.371469	0.710288	1	no
XLOC_000361	XLOC_000361	ISCW001745	DS616412:825-8206	ISG	IL	OK	9.2091	0	-1.79769e+308	-1.79769e+308	0.0145156	0.066059	no
XLOC_000362	XLOC_000362	ISCW001746	DS616412:9168-15150	ISG	IL	OK	19.0903	0.797094	-4.58195	3.74943	0.000177235	0.00302037	yes
XLOC_000363	XLOC_000363	ISCW024019	DS616499:336-537	ISG	IL	NOTEST	0	0	0	0	1	1	no
XLOC_000364	XLOC_000364	ISCW000609	DS616539:105914-139452	ISG	IL	NOTEST	0	0	0	0	1	1	no
XLOC_000365	XLOC_000365	ISCW000610	DS616539:147173-179696	ISG	IL	NOTEST	0.0555699	0.0939703	0.757901	-0.371469	0.710288	1	no
XLOC_000366	XLOC_000366	ISCW000612	DS616539:207394-224684	ISG	IL	NOTEST	0.371685	1.25706	1.7579	-0.994888	0.319791	1	no
XLOC_000367	XLOC_000367	ISCW000607	DS616539:22799-45212	ISG	IL	OK	1.41817	8.18196	2.52842	-2.68457	0.00726227	0.043313	yes
XLOC_000368	XLOC_000368	ISCW000608	DS616539:70319-101276	ISG	IL	OK	4.78567	1.51738	-1.65714	1.64802	0.0993494	0.209378	no
XLOC_000369	XLOC_000369	ISCW000613	DS616539:247778-253513	ISG	IL	OK	7.98653	7.41332	-0.10745	0.1103	0.912171	0.946532	no
XLOC_000370	XLOC_000370	ISCW024030	DS616543:930-2028	ISG	IL	NOTEST	0	1.23945	1.79769e+308	1.79769e+308	0.158655	1	no
XLOC_000371	XLOC_000371	ISCW000526	DS616569:1952-7383	ISG	IL	NOTEST	0	0	0	0	1	1	no
XLOC_000372	XLOC_000372	ISCW000527	DS616569:13125-15279	ISG	IL	NOTEST	0	0	0	0	1	1	no
XLOC_000373	XLOC_000373	ISCW000528	DS616569:37344-42011	ISG	IL	NOTEST	0	0	0	0	1	1	no
XLOC_000374	XLOC_000374	ISCW016125	DS616627:42239-47343	ISG	IL	NOTEST	0.0491027	0	-1.79769e+308	-1.79769e+308	0.158655	1	no
XLOC_000375	XLOC_000375	ISCW024090	DS616678:418-1655	ISG	IL	OK	15.6606	8.36292	-0.905064	0.897759	0.369314	0.525061	no
XLOC_000376	XLOC_000376	ISCW016372	DS616747:36742-37321	ISG	IL	NOTEST	0	0.496339	1.79769e+308	1.79769e+308	0.158655	1	no
XLOC_000377	XLOC_000377	-	DS616747:138475-161029	ISG	IL	NOTEST	0	0	0	0	1	1	no
XLOC_000378	XLOC_000378	-	DS616747:138475-161029	ISG	IL	NOTEST	0	0	0	0	1	1	no
XLOC_000379	XLOC_000379	-	DS616747:138475-161029	ISG	IL	NOTEST	0	0	0	0	1	1	no
XLOC_000380	XLOC_000380	ISCW016381	DS616747:171211-172466	ISG	IL	NOTEST	0.311943	0.351669	0.172938	-0.131313	0.895528	1	no
XLOC_000381	XLOC_000381	-	DS616747:278833-278908	ISG	IL	NOTEST	0	0	0	0	1	1	no
XLOC_000382	XLOC_000382	-	DS616747:88502-88584	ISG	IL	NOTEST	0	0	0	0	1	1	no
XLOC_000383	XLOC_000383	ISCW016374	DS616747:92716-98871	ISG	IL	NOTEST	0	0	0	0	1	1	no
XLOC_000384	XLOC_000384	ISCW016375	DS616747:111317-111629	ISG	IL	NOTEST	0	0	0	0	1	1	no
XLOC_000385	XLOC_000385	ISCW016376	DS616747:129166-129754	ISG	IL	NOTEST	0	0	0	0	1	1	no
XLOC_000386	XLOC_000386	ISCW016377	DS616747:138475-161029	ISG	IL	NOTEST	0	0	0	0	1	1	no
XLOC_000387	XLOC_000387	ISCW016382	DS616747:216451-278298	ISG	IL	NOTEST	0.207962	0.351669	0.757901	-0.525337	0.599349	1	no
XLOC_000388	XLOC_000388	ISCW001221	DS616786:4307-4667	ISG	IL	NOTEST	0	0	0	0	1	1	no
XLOC_000389	XLOC_000389	-	DS616798:215414-215487	ISG	IL	NOTEST	0	0	0	0	1	1	no
XLOC_000390	XLOC_000390	ISCW016489	DS616798:243162-244338	ISG	IL	OK	12.3715	1.33131	-3.2161	3.25474	0.00113494	0.011784	yes
XLOC_000391	XLOC_000391	ISCW016487	DS616798:93838-108893	ISG	IL	OK	33.3109	0.243852	-7.09385	4.42047	9.84866e-06	0.000364369	yes
XLOC_000392	XLOC_000392	ISCW000521	DS616803:12505-12742	ISG	IL	NOTEST	0	0	0	0	1	1	no
XLOC_000393	XLOC_000393	ISCW015833	DS616883:54464-71240	ISG	IL	OK	1.66004	79.7237	5.58572	-5.42459	5.80868e-08	6.1119e-06	yes
XLOC_000394	XLOC_000394	-	DS616883:287209-287291	ISG	IL	NOTEST	0	0	0	0	1	1	no
XLOC_000395	XLOC_000395	ISCW015841	DS616883:591478-591706	ISG	IL	NOTEST	0	0	0	0	1	1	no
XLOC_000396	XLOC_000396	-	DS616883:76880-76949	ISG	IL	NOTEST	0	0	0	0	1	1	no
XLOC_000397	XLOC_000397	ISCW015835	DS616883:110819-165071	ISG	IL	NOTEST	0	0.409117	1.79769e+308	1.79769e+308	0.0786496	1	no
XLOC_000398	XLOC_000398	ISCW015837	DS616883:316467-323867	ISG	IL	NOTEST	0	0.245805	1.79769e+308	1.79769e+308	0.158655	1	no
XLOC_000399	XLOC_000399	ISCW015838	DS616883:413554-444281	ISG	IL	NOTEST	0.119375	0.201867	0.757901	-0.371469	0.710288	1	no
XLOC_000400	XLOC_000400	ISCW015840	DS616883:579186-580107	ISG	IL	NOTEST	0	0.516437	1.79769e+308	1.79769e+308	0.0786496	1	no
XLOC_000401	XLOC_000401	ISCW015842	DS616883:615953-695595	ISG	IL	NOTEST	0	1.17743	1.79769e+308	1.79769e+308	0.158655	1	no
XLOC_000402	XLOC_000402	ISCW015844	DS616883:703080-709403	ISG	IL	OK	0	4.60515	1.79769e+308	1.79769e+308	0.0143092	0.066059	no
XLOC_000403	XLOC_000403	ISCW015845	DS616883:715330-727870	ISG	IL	OK	0.401775	4.75589	3.56526	-2.91363	0.00357251	0.0261809	yes
XLOC_000404	XLOC_000404	ISCW015846	DS616883:729507-736603	ISG	IL	OK	2.74225	33.123	3.5944	-3.69236	0.000222181	0.00357035	yes
XLOC_000405	XLOC_000405	ISCW015847	DS616883:832178-835128	ISG	IL	NOTEST	0	0.396828	1.79769e+308	1.79769e+308	0.158655	1	no
XLOC_000406	XLOC_000406	ISCW015848	DS616883:867073-878761	ISG	IL	NOTEST	0	0	0	0	1	1	no
XLOC_000407	XLOC_000407	ISCW015849	DS616883:982123-982519	ISG	IL	NOTEST	0.579121	0	-1.79769e+308	-1.79769e+308	0.158655	1	no
XLOC_000408	XLOC_000408	ISCW000972	DS616887:24709-25598	ISG	IL	OK	68.1983	80.7277	0.243328	-0.244747	0.806653	0.881683	no
XLOC_000409	XLOC_000409	ISCW000323	DS616898:23519-26663	ISG	IL	OK	0.675074	3.42471	2.34286	-1.40638	0.159611	0.286117	no
XLOC_000410	XLOC_000410	ISCW000326	DS616898:230557-241355	ISG	IL	OK	13.8817	1.71068	-3.02054	3.11622	0.00183186	0.0161862	yes
XLOC_000411	XLOC_000411	ISCW000329	DS616898:325567-326425	ISG	IL	NOTEST	0	0	0	0	1	1	no
XLOC_000412	XLOC_000412	ISCW000331	DS616898:342403-343012	ISG	IL	NOTEST	0	0	0	0	1	1	no
XLOC_000413	XLOC_000413	ISCW000332	DS616898:354755-373854	ISG	IL	OK	11.3879	4.95732	-1.19987	1.24546	0.212962	0.35311	no
XLOC_000414	XLOC_000414	ISCW000334	DS616898:394597-399749	ISG	IL	OK	27.4793	12.6731	-1.11657	1.18161	0.237361	0.385649	no
XLOC_000415	XLOC_000415	ISCW000324	DS616898:32686-64538	ISG	IL	OK	11.6901	5.44893	-1.10124	1.10409	0.269554	0.420786	no
XLOC_000416	XLOC_000416	ISCW000325	DS616898:218362-229450	ISG	IL	OK	8.34616	0.96229	-3.11657	2.93286	0.00335856	0.025094	yes
XLOC_000417	XLOC_000417	ISCW000327	DS616898:247930-297936	ISG	IL	OK	3.40787	0.515372	-2.72518	2.81654	0.00485445	0.0324542	yes
XLOC_000418	XLOC_000418	ISCW000328	DS616898:303046-306497	ISG	IL	OK	2.87928	0	-1.79769e+308	-1.79769e+308	0.017132	0.0678946	no
XLOC_000419	XLOC_000419	ISCW000330	DS616898:327911-342024	ISG	IL	NOTEST	0.0916718	0.542568	2.56526	-2.06019	0.0393802	1	no
XLOC_000420	XLOC_000420	ISCW000333	DS616898:381624-393884	ISG	IL	OK	6.62797	0	-1.79769e+308	-1.79769e+308	0.014722	0.066059	no
XLOC_000421	XLOC_000421	ISCW015794	DS616900:18850-38851	ISG	IL	OK	12.7111	17.5468	0.465119	-0.477371	0.633098	0.758408	no
XLOC_000422	XLOC_000422	ISCW015796	DS616900:73060-75965	ISG	IL	OK	4.16894	6.16857	0.565256	-0.565951	0.571427	0.710813	no
XLOC_000423	XLOC_000423	ISCW015795	DS616900:69412-69757	ISG	IL	NOTEST	0	0	0	0	1	1	no
XLOC_000424	XLOC_000424	ISCW015557	DS616928:138219-145814	ISG	IL	OK	6.74431	3.02577	-1.15637	1.22338	0.221188	0.363908	no
XLOC_000425	XLOC_000425	ISCW015560	DS616928:235984-249154	ISG	IL	OK	1.55722	24.8966	3.99891	-4.15853	3.20304e-05	0.000852335	yes
XLOC_000426	XLOC_000426	ISCW015563	DS616928:292446-308325	ISG	IL	OK	22.4161	7.05232	-1.66836	1.72535	0.0844638	0.185827	no
XLOC_000427	XLOC_000427	ISCW015565	DS616928:326694-329634	ISG	IL	OK	2578.19	2887.14	0.163284	-0.140325	0.888403	0.93453	no
XLOC_000428	XLOC_000428	ISCW015567	DS616928:438247-438817	ISG	IL	OK	4.21138	7.63025	0.857437	-0.898886	0.368714	0.524467	no
XLOC_000429	XLOC_000429	ISCW015572	DS616928:535532-552102	ISG	IL	OK	31.5515	62.6522	0.989656	-0.975231	0.329446	0.485159	no
XLOC_000430	XLOC_000430	ISCW015574	DS616928:552283-587599	ISG	IL	OK	99.0461	259.071	1.38717	-1.36374	0.17265	0.302911	no
XLOC_000431	XLOC_000431	-	DS616928:552283-587599	ISG	IL	NOTEST	0	0	0	0	1	1	no
XLOC_000432	XLOC_000432	ISCW015578	DS616928:593912-608095	ISG	IL	OK	4.98553	4.47342	-0.156369	0.167462	0.867006	0.920747	no
XLOC_000433	XLOC_000433	ISCW015580	DS616928:608921-616759	ISG	IL	OK	24.9021	19.9792	-0.317763	0.331195	0.740497	0.834727	no
XLOC_000434	XLOC_000434	ISCW015583	DS616928:646076-648350	ISG	IL	OK	24.7567	55.819	1.17294	-1.06449	0.287106	0.441337	no
XLOC_000435	XLOC_000435	ISCW015585	DS616928:648558-650277	ISG	IL	OK	22.9695	42.1905	0.8772	-0.933164	0.350735	0.506112	no
XLOC_000436	XLOC_000436	ISCW015555	DS616928:7080-7818	ISG	IL	NOTEST	0	0	0	0	1	1	no
XLOC_000437	XLOC_000437	ISCW015556	DS616928:103010-119443	ISG	IL	OK	2.30964	1.24271	-0.894176	0.920287	0.357423	0.513437	no
XLOC_000438	XLOC_000438	ISCW015558	DS616928:155146-164305	ISG	IL	OK	64.2485	32.2005	-0.996579	1.00012	0.317255	0.474084	no
XLOC_000439	XLOC_000439	ISCW015559	DS616928:167521-171464	ISG	IL	OK	13.1154	5.8799	-1.1574	1.16575	0.243716	0.393354	no
XLOC_000440	XLOC_000440	ISCW015561	DS616928:255787-270685	ISG	IL	OK	15.744	4.23556	-1.89418	1.97754	0.0479803	0.123493	no
XLOC_000441	XLOC_000441	ISCW015562	DS616928:275828-288180	ISG	IL	OK	17.6406	25.5692	0.535508	-0.545433	0.585456	0.722465	no
XLOC_000442	XLOC_000442	ISCW015564	DS616928:309988-320918	ISG	IL	OK	49.9367	28.7111	-0.798493	0.778721	0.436144	0.591479	no
XLOC_000443	XLOC_000443	ISCW015566	DS616928:332719-390488	ISG	IL	OK	63.7053	43.6151	-0.546584	0.488254	0.62537	0.751663	no
XLOC_000444	XLOC_000444	ISCW015568	DS616928:439677-447118	ISG	IL	OK	27.9463	78.203	1.48457	-1.43666	0.150815	0.285968	no
XLOC_000445	XLOC_000445	ISCW015569	DS616928:450367-458181	ISG	IL	OK	20.2838	2.44086	-3.05487	3.15555	0.00160195	0.0147747	yes
XLOC_000446	XLOC_000446	ISCW015570	DS616928:478674-514504	ISG	IL	OK	12.5964	0.135387	-6.53978	5.93248	2.98389e-09	5.34722e-07	yes
XLOC_000447	XLOC_000447	ISCW015571	DS616928:518195-533877	ISG	IL	OK	10.4613	1.43824	-2.86269	2.93634	0.00332105	0.0249929	yes
XLOC_000448	XLOC_000448	ISCW015573	DS616928:535532-552102	ISG	IL	OK	15.9007	20.2329	0.347617	-0.3531	0.724013	0.823605	no
XLOC_000449	XLOC_000449	ISCW015575	DS616928:552283-587599	ISG	IL	OK	6.0817	6.02455	-0.0136219	0.0140108	0.988821	0.992543	no
XLOC_000450	XLOC_000450	ISCW015577	DS616928:590821-593457	ISG	IL	OK	21.3077	18.0159	-0.242099	0.248661	0.803623	0.880181	no
XLOC_000451	XLOC_000451	ISCW015579	DS616928:593912-608095	ISG	IL	OK	195.39	216.939	0.150933	-0.143868	0.885605	0.932947	no
XLOC_000452	XLOC_000452	ISCW015581	DS616928:637720-641301	ISG	IL	OK	101.029	109.024	0.109877	-0.102579	0.918297	0.950365	no
XLOC_000453	XLOC_000453	ISCW015582	DS616928:642049-645549	ISG	IL	OK	17.5595	71.2646	2.02094	-2.0267	0.0426935	0.113162	no
XLOC_000454	XLOC_000454	ISCW015584	DS616928:646076-648350	ISG	IL	OK	45.1351	49.203	0.124498	-0.12147	0.903319	0.941063	no
XLOC_000455	XLOC_000455	ISCW015586	DS616928:650337-681278	ISG	IL	OK	22.1488	32.1171	0.536109	-0.530118	0.59603	0.730406	no
XLOC_000456	XLOC_000456	ISCW000247	DS616980:1406-1640	ISG	IL	NOTEST	0	0	0	0	1	1	no
XLOC_000457	XLOC_000457	ISCW001271	DS617085:39403-39700	ISG	IL	OK	1.16854	0	-1.79769e+308	-1.79769e+308	0.158655	0.285968	no
XLOC_000458	XLOC_000458	-	DS617115:94181-94263	ISG	IL	NOTEST	0	0	0	0	1	1	no
XLOC_000459	XLOC_000459	ISCW000844	DS617115:5652-26444	ISG	IL	NOTEST	0	0	0	0	1	1	no
XLOC_000460	XLOC_000460	ISCW001103	DS617211:19528-35867	ISG	IL	NOTEST	0.191353	0.728061	1.92783	-0.998738	0.317921	1	no
XLOC_000461	XLOC_000461	ISCW001104	DS617211:73211-73553	ISG	IL	OK	0	31.3733	1.79769e+308	1.79769e+308	0.0145156	0.066059	no
XLOC_000462	XLOC_000462	ISCW001105	DS617211:76920-88100	ISG	IL	NOTEST	0	1.58964	1.79769e+308	1.79769e+308	0.0590851	1	no
XLOC_000463	XLOC_000463	ISCW016564	DS617457:4820-6244	ISG	IL	NOTEST	0	0	0	0	1	1	no
XLOC_000464	XLOC_000464	ISCW001808	DS617582:5997-8576	ISG	IL	NOTEST	0.561297	0	-1.79769e+308	-1.79769e+308	0.158655	1	no
XLOC_000465	XLOC_000465	ISCW000643	DS617630:32894-34870	ISG	IL	OK	3.26341	5.72676	0.81134	-0.865719	0.386644	0.542703	no
XLOC_000466	XLOC_000466	ISCW000641	DS617630:6472-7064	ISG	IL	OK	78.2743	514.749	2.71726	-2.84747	0.00440684	0.0302782	yes
XLOC_000467	XLOC_000467	ISCW000642	DS617630:7247-30764	ISG	IL	OK	92.5096	52.4847	-0.817706	0.800985	0.423141	0.578795	no
XLOC_000468	XLOC_000468	ISCW000644	DS617630:35032-51023	ISG	IL	OK	8.53461	2.18041	-1.96872	2.05744	0.0396434	0.110196	no
XLOC_000469	XLOC_000469	ISCW000646	DS617630:51945-59772	ISG	IL	NOTEST	0.947108	0.800793	-0.242099	0.137017	0.891018	1	no
XLOC_000470	XLOC_000470	ISCW000647	DS617630:63216-64734	ISG	IL	OK	5.56791	98.3709	4.14302	-4.17487	2.98163e-05	0.000818093	yes
XLOC_000471	XLOC_000471	ISCW000648	DS617630:72710-75601	ISG	IL	OK	14.3067	3.90211	-1.87437	1.8596	0.0629428	0.152781	no
XLOC_000472	XLOC_000472	ISCW000649	DS617630:113103-121509	ISG	IL	NOTEST	0.432935	0	-1.79769e+308	-1.79769e+308	0.0786496	1	no
XLOC_000473	XLOC_000473	ISCW015797	DS617658:15339-18342	ISG	IL	NOTEST	0	0	0	0	1	1	no
XLOC_000474	XLOC_000474	ISCW015798	DS617658:736184-736340	ISG	IL	NOTEST	0	0	0	0	1	1	no
XLOC_000475	XLOC_000475	ISCW015800	DS617658:802616-802808	ISG	IL	NOTEST	0	0	0	0	1	1	no
XLOC_000476	XLOC_000476	-	DS617658:742551-742625	ISG	IL	NOTEST	0	0	0	0	1	1	no
XLOC_000477	XLOC_000477	ISCW001820	DS617675:17622-20184	ISG	IL	OK	10.6363	4.53567	-1.22961	1.2721	0.203338	0.343054	no
XLOC_000478	XLOC_000478	ISCW001802	DS617680:10954-11419	ISG	IL	NOTEST	0.423777	0	-1.79769e+308	-1.79769e+308	0.158655	1	no
XLOC_000479	XLOC_000479	ISCW001803	DS617680:26115-41628	ISG	IL	OK	1.24912	14.4341	3.53049	-3.50818	0.000451176	0.0059341	yes
XLOC_000480	XLOC_000480	ISCW000004	DS617696:1609-1682	ISG	IL	NOTEST	0	0	0	0	1	1	no
XLOC_000481	XLOC_000481	ISCW001341	DS617744:129015-129300	ISG	IL	NOTEST	0	0	0	0	1	1	no
XLOC_000482	XLOC_000482	ISCW001340	DS617744:37907-99815	ISG	IL	OK	6.53432	107.647	4.04212	-3.79204	0.000149412	0.00269001	yes
XLOC_000483	XLOC_000483	ISCW016467	DS617765:31152-33286	ISG	IL	NOTEST	0	0	0	0	1	1	no
XLOC_000484	XLOC_000484	ISCW001482	DS617797:40302-43514	ISG	IL	NOTEST	0	0	0	0	1	1	no
XLOC_000485	XLOC_000485	ISCW000733	DS617804:56139-61955	ISG	IL	OK	0.252783	2.56478	3.34286	-3.13495	0.00171886	0.0153533	yes
XLOC_000486	XLOC_000486	ISCW000731	DS617804:3880-4060	ISG	IL	NOTEST	0	0	0	0	1	1	no
XLOC_000487	XLOC_000487	ISCW000732	DS617804:6341-25625	ISG	IL	OK	0.676253	3.1448	2.21733	-2.2344	0.0254567	0.0830619	no
XLOC_000488	XLOC_000488	ISCW001013	DS617909:7297-8049	ISG	IL	OK	7.33783	1.48902	-2.30099	2.16775	0.030178	0.0897826	no
XLOC_000489	XLOC_000489	ISCW000717	DS617951:1166-11418	ISG	IL	OK	0	2.1007	1.79769e+308	1.79769e+308	0.157625	0.285968	no
XLOC_000490	XLOC_000490	ISCW000719	DS617951:20967-57671	ISG	IL	OK	4.34151	1.49552	-1.53756	1.6205	0.105125	0.218738	no
XLOC_000491	XLOC_000491	ISCW000721	DS617951:131302-131761	ISG	IL	OK	20.3939	56.4994	1.4701	-1.56125	0.118465	0.240262	no
XLOC_000492	XLOC_000492	ISCW000725	DS617951:245059-249699	ISG	IL	OK	5.81181	1.55178	-1.90506	1.79057	0.0733621	0.171258	no
XLOC_000493	XLOC_000493	ISCW000727	DS617951:264119-268490	ISG	IL	OK	1.23658	0	-1.79769e+308	-1.79769e+308	0.0786496	0.175622	no
XLOC_000494	XLOC_000494	ISCW000728	DS617951:311111-312145	ISG	IL	OK	2.46788	3.12995	0.342863	-0.332083	0.739826	0.834562	no
XLOC_000495	XLOC_000495	ISCW000729	DS617951:320251-320512	ISG	IL	OK	3.44274	46.5741	3.7579	-3.08081	0.00206437	0.0178017	yes
XLOC_000496	XLOC_000496	ISCW000718	DS617951:1166-11418	ISG	IL	OK	3.99972	2.7737	-0.528083	0.562789	0.573579	0.712099	no
XLOC_000497	XLOC_000497	ISCW000720	DS617951:64860-119289	ISG	IL	OK	8.44515	3.02298	-1.48215	1.55433	0.120106	0.242013	no
XLOC_000498	XLOC_000498	ISCW000722	DS617951:172919-178317	ISG	IL	NOTEST	0.271036	0.45833	0.757901	-0.643404	0.519962	1	no
XLOC_000499	XLOC_000499	ISCW000723	DS617951:195459-201132	ISG	IL	OK	2.47317	4.1822	0.757901	-0.742939	0.457519	0.608522	no
XLOC_000500	XLOC_000500	ISCW000724	DS617951:204874-212823	ISG	IL	OK	2.73595	0.925313	-1.56403	1.26884	0.204497	0.343472	no
XLOC_000501	XLOC_000501	ISCW000726	DS617951:256438-256879	ISG	IL	OK	1.40236	1.58095	0.172938	-0.131313	0.895528	0.935505	no
XLOC_000502	XLOC_000502	ISCW001530	DS617959:5688-14653	ISG	IL	OK	5.04834	7.7567	0.619634	-0.659613	0.509502	0.657901	no
XLOC_000503	XLOC_000503	ISCW000252	DS617963:68380-68794	ISG	IL	OK	0	3.57615	1.79769e+308	1.79769e+308	0.0227501	0.0762482	no
XLOC_000504	XLOC_000504	ISCW000250	DS617963:42368-56970	ISG	IL	NOTEST	0.490623	0.829657	0.757901	-0.371469	0.710288	1	no
XLOC_000505	XLOC_000505	ISCW000738	DS618001:4024-13049	ISG	IL	OK	5.49933	10.8494	0.980293	-0.939865	0.347287	0.502274	no
XLOC_000506	XLOC_000506	-	DS618020:63560-76870	ISG	IL	NOTEST	0	0	0	0	1	1	no
XLOC_000507	XLOC_000507	-	DS618020:114381-114453	ISG	IL	NOTEST	0	0	0	0	1	1	no
XLOC_000508	XLOC_000508	ISCW001262	DS618020:115847-183092	ISG	IL	NOTEST	0.241246	0.101988	-1.2421	0.770064	0.441262	1	no
XLOC_000509	XLOC_000509	ISCW001264	DS618020:214261-239831	ISG	IL	OK	17.0635	30.2289	0.825015	-0.864546	0.387288	0.54334	no
XLOC_000510	XLOC_000510	ISCW001265	DS618020:321652-342831	ISG	IL	OK	32.5384	31.6276	-0.0409592	0.0426692	0.965965	0.979112	no
XLOC_000511	XLOC_000511	ISCW001267	DS618020:344201-344381	ISG	IL	NOTEST	0	0	0	0	1	1	no
XLOC_000512	XLOC_000512	ISCW001270	DS618020:408419-408935	ISG	IL	OK	40.7094	6.25826	-2.70153	2.75707	0.00583223	0.0367931	yes
XLOC_000513	XLOC_000513	ISCW001258	DS618020:63560-76870	ISG	IL	NOTEST	0	0	0	0	1	1	no
XLOC_000514	XLOC_000514	ISCW001266	DS618020:343463-343676	ISG	IL	OK	159.215	2680.67	4.07354	-4.16436	3.12222e-05	0.000837846	yes
XLOC_000515	XLOC_000515	ISCW001268	DS618020:356502-358911	ISG	IL	OK	17.0406	3.84216	-2.14899	1.75819	0.0787159	0.175622	no
XLOC_000516	XLOC_000516	ISCW001269	DS618020:386290-396046	ISG	IL	OK	5.1899	1.19676	-2.11657	2.10235	0.0355223	0.101471	no
XLOC_000517	XLOC_000517	ISCW015993	DS618074:15038-31306	ISG	IL	OK	2.27547	0.549698	-2.04945	1.2732	0.202947	0.342495	no
XLOC_000518	XLOC_000518	ISCW015994	DS618074:82959-85488	ISG	IL	OK	36.7006	128.234	1.8049	-1.81922	0.0688781	0.163486	no
XLOC_000519	XLOC_000519	ISCW015997	DS618074:138250-147014	ISG	IL	OK	63.8472	23.1859	-1.46138	1.41343	0.157529	0.285968	no
XLOC_000520	XLOC_000520	ISCW015998	DS618074:148367-152706	ISG	IL	OK	12.1351	2.70011	-2.1681	2.15028	0.0315331	0.0927791	no
XLOC_000521	XLOC_000521	ISCW016000	DS618074:168653-177327	ISG	IL	OK	11.4506	6.11471	-0.905064	0.962965	0.335565	0.491959	no
XLOC_000522	XLOC_000522	ISCW016001	DS618074:181759-207875	ISG	IL	OK	12.742	22.6245	0.82829	-0.843293	0.399065	0.555132	no
XLOC_000523	XLOC_000523	ISCW015995	DS618074:86825-95670	ISG	IL	OK	17.6307	11.4042	-0.628516	0.650735	0.515218	0.662956	no
XLOC_000524	XLOC_000524	ISCW015996	DS618074:113688-122874	ISG	IL	OK	36.7155	113.102	1.62317	-1.55428	0.120117	0.242013	no
XLOC_000525	XLOC_000525	ISCW015999	DS618074:158282-167807	ISG	IL	OK	71.1078	35.2234	-1.01347	0.99923	0.317683	0.474353	no
XLOC_000526	XLOC_000526	ISCW001822	DS618091:63102-63508	ISG	IL	NOTEST	0	0	0	0	1	1	no
XLOC_000527	XLOC_000527	ISCW001821	DS618091:17406-17742	ISG	IL	OK	11.7959	0	-1.79769e+308	-1.79769e+308	0.0163813	0.0672943	no
XLOC_000528	XLOC_000528	ISCW024064	DS618092:1551-3039	ISG	IL	NOTEST	0.103192	0	-1.79769e+308	-1.79769e+308	0.158655	1	no
XLOC_000529	XLOC_000529	ISCW000925	DS618114:861-9545	ISG	IL	NOTEST	0	0	0	0	1	1	no
XLOC_000530	XLOC_000530	ISCW000927	DS618114:38100-38896	ISG	IL	NOTEST	0.454633	0	-1.79769e+308	-1.79769e+308	0.0786496	1	no
XLOC_000531	XLOC_000531	-	DS618114:27753-27835	ISG	IL	NOTEST	0	0	0	0	1	1	no
XLOC_000532	XLOC_000532	ISCW000014	DS618129:76970-98235	ISG	IL	OK	9.94502	21.5684	1.11687	-1.1201	0.262669	0.412792	no
XLOC_000533	XLOC_000533	ISCW000018	DS618129:160820-165836	ISG	IL	OK	207.932	262.326	0.33525	-0.32358	0.746256	0.839095	no
XLOC_000534	XLOC_000534	-	DS618129:169254-188949	ISG	IL	NOTEST	0	0	0	0	1	1	no
XLOC_000535	XLOC_000535	ISCW000021	DS618129:206459-209712	ISG	IL	OK	147.344	7.44508	-4.30675	4.35624	1.32316e-05	0.000464079	yes
XLOC_000536	XLOC_000536	ISCW000022	DS618129:210781-249879	ISG	IL	OK	48.2989	6.88505	-2.81045	2.68974	0.00715078	0.0427593	yes
XLOC_000537	XLOC_000537	ISCW000024	DS618129:250269-258956	ISG	IL	OK	27.8031	15.3616	-0.855916	0.885534	0.375869	0.531874	no
XLOC_000538	XLOC_000538	ISCW000012	DS618129:4535-72939	ISG	IL	OK	41.672	20.2244	-1.04298	0.966189	0.33395	0.490029	no
XLOC_000539	XLOC_000539	ISCW000015	DS618129:101528-110683	ISG	IL	OK	3.26593	0.26299	-3.63442	2.99144	0.00277662	0.0219579	yes
XLOC_000540	XLOC_000540	ISCW000016	DS618129:126922-131756	ISG	IL	OK	2.19123	1.95023	-0.168099	0.175551	0.860647	0.916675	no
XLOC_000541	XLOC_000541	ISCW000017	DS618129:131912-140223	ISG	IL	OK	6.65311	1.77641	-1.90506	1.79057	0.0733621	0.171258	no
XLOC_000542	XLOC_000542	ISCW000019	DS618129:169254-188949	ISG	IL	OK	15.3598	2.45699	-2.6442	2.73378	0.00626127	0.0388165	yes
XLOC_000543	XLOC_000543	-	DS618129:250269-258956	ISG	IL	NOTEST	0	0	0	0	1	1	no
XLOC_000544	XLOC_000544	ISCW000026	DS618129:259167-259452	ISG	IL	OK	423.672	516.194	0.284965	-0.284969	0.775668	0.860112	no
XLOC_000545	XLOC_000545	ISCW000027	DS618129:259779-262111	ISG	IL	OK	326.336	2941.57	3.17215	-3.16905	0.0015294	0.0143553	yes
XLOC_000546	XLOC_000546	ISCW000028	DS618129:262393-275490	ISG	IL	OK	77.709	38.8145	-1.00149	0.979357	0.327404	0.482461	no
XLOC_000547	XLOC_000547	ISCW000029	DS618129:292274-292748	ISG	IL	OK	1.63773	0.692361	-1.2421	0.770064	0.441262	0.594623	no
XLOC_000548	XLOC_000548	ISCW000847	DS618229:102139-111025	ISG	IL	NOTEST	0	0	0	0	1	1	no
XLOC_000549	XLOC_000549	ISCW001586	DS618250:183-25643	ISG	IL	NOTEST	0.889978	0.25083	-1.82706	1.12034	0.262568	1	no
XLOC_000550	XLOC_000550	ISCW001635	DS618314:1503-19201	ISG	IL	OK	1.14697	0.16163	-2.82706	1.7725	0.076312	0.175622	no
XLOC_000551	XLOC_000551	ISCW001636	DS618314:54389-57005	ISG	IL	NOTEST	0	0.546435	1.79769e+308	1.79769e+308	0.158655	1	no
XLOC_000552	XLOC_000552	ISCW024094	DS618358:85-754	ISG	IL	OK	59.5697	45.7882	-0.379603	0.397266	0.691171	0.802047	no
XLOC_000553	XLOC_000553	ISCW016398	DS618385:20035-31485	ISG	IL	OK	0	24.0731	1.79769e+308	1.79769e+308	0.0162914	0.0672943	no
XLOC_000554	XLOC_000554	ISCW016402	DS618385:90444-108572	ISG	IL	NOTEST	0	0	0	0	1	1	no
XLOC_000555	XLOC_000555	ISCW016405	DS618385:113380-145500	ISG	IL	OK	1.27477	22.5627	4.14563	-4.28923	1.79295e-05	0.000576003	yes
XLOC_000556	XLOC_000556	ISCW016406	DS618385:188739-196960	ISG	IL	OK	21.5699	71.6321	1.73159	-1.78984	0.0734798	0.171463	no
XLOC_000557	XLOC_000557	ISCW016400	DS618385:55561-58844	ISG	IL	OK	0	14.3023	1.79769e+308	1.79769e+308	0.0173164	0.0683921	no
XLOC_000558	XLOC_000558	ISCW016401	DS618385:73522-74146	ISG	IL	NOTEST	0	0	0	0	1	1	no
XLOC_000559	XLOC_000559	-	DS618385:90444-108572	ISG	IL	NOTEST	0	0	0	0	1	1	no
XLOC_000560	XLOC_000560	-	DS618385:233661-233734	ISG	IL	NOTEST	0	0	0	0	1	1	no
XLOC_000561	XLOC_000561	ISCW016408	DS618385:256272-304535	ISG	IL	OK	28.1451	4.37776	-2.68462	2.75344	0.00589728	0.0370811	yes
XLOC_000562	XLOC_000562	ISCW015718	DS618472:24985-44134	ISG	IL	NOTEST	0.392094	0.442029	0.172938	-0.131313	0.895528	1	no
XLOC_000563	XLOC_000563	ISCW001106	DS618549:27119-28875	ISG	IL	NOTEST	0	0	0	0	1	1	no
XLOC_000564	XLOC_000564	ISCW001217	DS618558:6462-6619	ISG	IL	NOTEST	0	0	0	0	1	1	no
XLOC_000565	XLOC_000565	ISCW024018	DS618620:114-333	ISG	IL	NOTEST	0	0	0	0	1	1	no
XLOC_000566	XLOC_000566	ISCW001770	DS618811:1908-4516	ISG	IL	NOTEST	0	0	0	0	1	1	no
XLOC_000567	XLOC_000567	ISCW001773	DS618811:279610-279970	ISG	IL	NOTEST	0	0	0	0	1	1	no
XLOC_000568	XLOC_000568	ISCW001774	DS618811:298606-302304	ISG	IL	NOTEST	0	0	0	0	1	1	no
XLOC_000569	XLOC_000569	ISCW001771	DS618811:11065-22702	ISG	IL	NOTEST	0	0	0	0	1	1	no
XLOC_000570	XLOC_000570	ISCW001682	DS618994:9828-10750	ISG	IL	OK	5.67541	0	-1.79769e+308	-1.79769e+308	0.0786496	0.175622	no
XLOC_000571	XLOC_000571	ISCW024069	DS619006:594-929	ISG	IL	OK	98.293	15.6808	-2.64809	2.62016	0.00878886	0.0497529	yes
XLOC_000572	XLOC_000572	ISCW016133	DS619012:6547-20195	ISG	IL	NOTEST	0	0.144501	1.79769e+308	1.79769e+308	0.158655	1	no
XLOC_000573	XLOC_000573	ISCW001239	DS619043:565-37926	ISG	IL	OK	1.81092	1.08082	-0.744599	0.735578	0.461988	0.613115	no
XLOC_000574	XLOC_000574	ISCW024016	DS619051:2017-2214	ISG	IL	OK	9.30254	47.1926	2.34286	-1.84139	0.0655651	0.157082	no
XLOC_000575	XLOC_000575	ISCW000010	DS619141:3601-18607	ISG	IL	OK	28.581	12.8226	-1.15637	1.21054	0.22607	0.370612	no
XLOC_000576	XLOC_000576	ISCW000011	DS619141:25839-40074	ISG	IL	OK	526.639	463.389	-0.184592	0.171116	0.864132	0.919107	no
XLOC_000577	XLOC_000577	ISCW000671	DS619341:32462-37613	ISG	IL	NOTEST	0	0	0	0	1	1	no
XLOC_000578	XLOC_000578	ISCW000317	DS619363:10556-20173	ISG	IL	NOTEST	0.242743	0.820971	1.7579	-1.40698	0.159432	1	no
XLOC_000579	XLOC_000579	ISCW001554	DS619399:8993-9423	ISG	IL	NOTEST	0	0	0	0	1	1	no
XLOC_000580	XLOC_000580	ISCW000266	DS619488:5658-9718	ISG	IL	OK	296.319	533.984	0.849643	-0.858475	0.39063	0.546692	no
XLOC_000581	XLOC_000581	ISCW000875	DS619499:1308-9824	ISG	IL	OK	60.5177	10.5866	-2.51512	2.36928	0.0178226	0.0693611	no
XLOC_000582	XLOC_000582	ISCW000876	DS619499:11539-26380	ISG	IL	OK	21.5093	19.2316	-0.161481	0.16357	0.87007	0.922264	no
XLOC_000583	XLOC_000583	ISCW024092	DS619508:980-1811	ISG	IL	NOTEST	0	0	0	0	1	1	no
XLOC_000584	XLOC_000584	ISCW016090	DS619513:67198-71289	ISG	IL	OK	18.6062	17.2189	-0.111791	0.111408	0.911293	0.946019	no
XLOC_000585	XLOC_000585	ISCW016092	DS619513:93111-95498	ISG	IL	OK	6.65478	15.4734	1.21733	-1.28319	0.199425	0.339024	no
XLOC_000586	XLOC_000586	ISCW016095	DS619513:150638-162367	ISG	IL	NOTEST	0	0	0	0	1	1	no
XLOC_000587	XLOC_000587	ISCW016086	DS619513:3958-35223	ISG	IL	NOTEST	0	0	0	0	1	1	no
XLOC_000588	XLOC_000588	ISCW016088	DS619513:35918-52593	ISG	IL	OK	50.8213	75.6245	0.573421	-0.539839	0.589308	0.725579	no
XLOC_000589	XLOC_000589	ISCW016091	DS619513:79726-83509	ISG	IL	NOTEST	0.743371	0	-1.79769e+308	-1.79769e+308	0.0786496	1	no
XLOC_000590	XLOC_000590	ISCW016093	DS619513:96242-114098	ISG	IL	OK	21.2824	10.3017	-1.04677	1.07415	0.282755	0.436697	no
XLOC_000591	XLOC_000591	ISCW016094	DS619513:150638-162367	ISG	IL	NOTEST	0.529631	1.79124	1.7579	-1.86356	0.062383	1	no
XLOC_000592	XLOC_000592	ISCW001505	DS619556:28500-55348	ISG	IL	NOTEST	0.473554	0	-1.79769e+308	-1.79769e+308	0.158655	1	no
XLOC_000593	XLOC_000593	ISCW001504	DS619556:16209-16656	ISG	IL	NOTEST	0	0	0	0	1	1	no
XLOC_000594	XLOC_000594	ISCW001679	DS619580:43862-57807	ISG	IL	NOTEST	0	0	0	0	1	1	no
XLOC_000595	XLOC_000595	ISCW000152	DS619588:3695-16529	ISG	IL	OK	1.73865	15.0681	3.11545	-3.24382	0.00117938	0.0121312	yes
XLOC_000596	XLOC_000596	ISCW024012	DS619609:556-4028	ISG	IL	OK	209.462	78.9262	-1.40811	1.408	0.159131	0.286117	no
XLOC_000597	XLOC_000597	ISCW001708	DS619667:40268-45452	ISG	IL	OK	32.4201	36.1264	0.156163	-0.160013	0.872871	0.923964	no
XLOC_000598	XLOC_000598	ISCW000245	DS619730:33109-33514	ISG	IL	NOTEST	0	0.93477	1.79769e+308	1.79769e+308	0.158655	1	no
XLOC_000599	XLOC_000599	ISCW000246	DS619730:51104-51287	ISG	IL	NOTEST	0	0	0	0	1	1	no
XLOC_000600	XLOC_000600	ISCW000806	DS619832:44988-55114	ISG	IL	OK	2.16298	30.2773	3.80714	-3.96402	7.36982e-05	0.00164125	yes
XLOC_000601	XLOC_000601	ISCW016275	DS619893:71260-72292	ISG	IL	NOTEST	0.132126	0.670286	2.34286	-1.40638	0.159611	1	no
XLOC_000602	XLOC_000602	ISCW016277	DS619893:102399-104729	ISG	IL	OK	4.8223	3.99057	-0.273126	0.288531	0.77294	0.857973	no
XLOC_000603	XLOC_000603	ISCW016279	DS619893:145069-164930	ISG	IL	OK	2.83928	14.4039	2.34286	-2.15494	0.0311662	0.0919591	no
XLOC_000604	XLOC_000604	ISCW016280	DS619893:180779-189271	ISG	IL	OK	7.36306	13.5184	0.876545	-0.925539	0.354686	0.51098	no
XLOC_000605	XLOC_000605	ISCW016282	DS619893:213997-215698	ISG	IL	OK	2.94301	0.493213	-2.57701	2.58266	0.00980426	0.0536731	no
XLOC_000606	XLOC_000606	ISCW016274	DS619893:853-1168	ISG	IL	NOTEST	0	0	0	0	1	1	no
XLOC_000607	XLOC_000607	ISCW016276	DS619893:78538-95685	ISG	IL	OK	450.306	158.707	-1.50454	1.34827	0.177571	0.309649	no
XLOC_000608	XLOC_000608	ISCW016278	DS619893:108669-112624	ISG	IL	OK	3453.32	4503.6	0.383092	-0.327373	0.743385	0.837102	no
XLOC_000609	XLOC_000609	ISCW016281	DS619893:192958-212959	ISG	IL	OK	57.9142	60.0089	0.0512598	-0.0509565	0.95936	0.975037	no
XLOC_000610	XLOC_000610	ISCW016283	DS619893:213997-215698	ISG	IL	OK	8.70359	0	-1.79769e+308	-1.79769e+308	0.016176	0.0672943	no
XLOC_000611	XLOC_000611	ISCW001716	DS619906:24252-24499	ISG	IL	NOTEST	0	0	0	0	1	1	no
XLOC_000612	XLOC_000612	ISCW001292	DS619908:3505-5650	ISG	IL	NOTEST	0.449609	0	-1.79769e+308	-1.79769e+308	0.0194336	1	no
XLOC_000613	XLOC_000613	ISCW024080	DS619910:417-930	ISG	IL	OK	17.1387	2.41516	-2.82706	2.88901	0.00386457	0.0277364	yes
XLOC_000614	XLOC_000614	ISCW015692	DS619969:60946-61456	ISG	IL	NOTEST	0	0	0	0	1	1	no
XLOC_000615	XLOC_000615	ISCW000429	DS619980:223378-228084	ISG	IL	OK	1.50539	0	-1.79769e+308	-1.79769e+308	0.0786496	0.175622	no
XLOC_000616	XLOC_000616	ISCW000428	DS619980:144111-144193	ISG	IL	NOTEST	0	0	0	0	1	1	no
XLOC_000617	XLOC_000617	-	DS619987:105268-105350	ISG	IL	NOTEST	0	0	0	0	1	1	no
XLOC_000618	XLOC_000618	ISCW016341	DS619987:37523-38495	ISG	IL	NOTEST	0	0	0	0	1	1	no
XLOC_000619	XLOC_000619	ISCW015915	DS620030:119459-120269	ISG	IL	NOTEST	0	0	0	0	1	1	no
XLOC_000620	XLOC_000620	ISCW015918	DS620030:563705-565938	ISG	IL	NOTEST	0	0	0	0	1	1	no
XLOC_000621	XLOC_000621	ISCW015920	DS620030:740437-753450	ISG	IL	OK	22.1013	0	-1.79769e+308	-1.79769e+308	0.0145482	0.066059	no
XLOC_000622	XLOC_000622	ISCW015916	DS620030:375532-385847	ISG	IL	OK	35.4865	24.3608	-0.542711	0.530735	0.595602	0.730115	no
XLOC_000623	XLOC_000623	ISCW015917	DS620030:555416-562032	ISG	IL	NOTEST	0	0	0	0	1	1	no
XLOC_000624	XLOC_000624	-	DS620030:601319-601392	ISG	IL	NOTEST	0	0	0	0	1	1	no
XLOC_000625	XLOC_000625	ISCW001568	DS620084:1876-10490	ISG	IL	OK	7.17382	2.16627	-1.72753	1.71428	0.0864779	0.189097	no
XLOC_000626	XLOC_000626	ISCW001569	DS620084:12243-25012	ISG	IL	OK	10.0524	2.6152	-1.94254	2.02187	0.04319	0.114188	no
XLOC_000627	XLOC_000627	ISCW001570	DS620084:25104-27028	ISG	IL	OK	17.0158	3.92376	-2.11657	1.99275	0.0462884	0.12044	no
XLOC_000628	XLOC_000628	ISCW001571	DS620084:27740-36042	ISG	IL	OK	1.25784	0.472675	-1.41202	1.14196	0.25347	0.403981	no
XLOC_000629	XLOC_000629	-	DS620084:88456-88535	ISG	IL	NOTEST	0	0	0	0	1	1	no
XLOC_000630	XLOC_000630	-	DS620084:27740-36042	ISG	IL	NOTEST	0	0	0	0	1	1	no
XLOC_000631	XLOC_000631	ISCW001573	DS620084:46051-56949	ISG	IL	OK	16.208	8.21138	-0.981013	1.00907	0.312942	0.469659	no
XLOC_000632	XLOC_000632	ISCW001574	DS620084:67475-70400	ISG	IL	NOTEST	1.08178	0.47427	-1.18963	1.2246	0.220724	1	no
XLOC_000633	XLOC_000633	ISCW001576	DS620084:91058-105313	ISG	IL	OK	6.61616	0.932343	-2.82706	2.32832	0.0198953	0.0715375	no
XLOC_000634	XLOC_000634	ISCW001179	DS620128:1703-2363	ISG	IL	NOTEST	0	0	0	0	1	1	no
XLOC_000635	XLOC_000635	ISCW024086	DS620129:177-864	ISG	IL	OK	17.7314	8.46134	-1.06735	1.13179	0.257721	0.408711	no
XLOC_000636	XLOC_000636	ISCW024027	DS620209:8-1049	ISG	IL	NOTEST	0	0	0	0	1	1	no
XLOC_000637	XLOC_000637	ISCW001428	DS620210:16670-16823	ISG	IL	OK	16.1617	0	-1.79769e+308	-1.79769e+308	0.158655	0.285968	no
XLOC_000638	XLOC_000638	ISCW001430	DS620210:43989-45060	ISG	IL	NOTEST	0	0	0	0	1	1	no
XLOC_000639	XLOC_000639	ISCW001431	DS620210:49332-49721	ISG	IL	NOTEST	0	0	0	0	1	1	no
XLOC_000640	XLOC_000640	ISCW000306	DS620267:20363-20968	ISG	IL	OK	1.37142	0	-1.79769e+308	-1.79769e+308	0.0293909	0.0878738	no
XLOC_000641	XLOC_000641	ISCW000258	DS620274:67268-68650	ISG	IL	NOTEST	0	0.235431	1.79769e+308	1.79769e+308	0.158655	1	no
XLOC_000642	XLOC_000642	ISCW000259	DS620274:90030-149464	ISG	IL	NOTEST	0.0581838	0.0983904	0.757901	-0.371469	0.710288	1	no
XLOC_000643	XLOC_000643	ISCW000260	DS620274:157938-182899	ISG	IL	OK	0.365017	1.85176	2.34286	-2.36319	0.0181182	0.0699186	no
XLOC_000644	XLOC_000644	ISCW000262	DS620274:267512-278804	ISG	IL	OK	48.6336	44.097	-0.141275	0.141232	0.887687	0.934454	no
XLOC_000645	XLOC_000645	ISCW000261	DS620274:185486-267279	ISG	IL	OK	199.213	21.7339	-3.1963	3.18092	0.00146806	0.013996	yes
XLOC_000646	XLOC_000646	ISCW000263	DS620274:282845-283988	ISG	IL	OK	17.9315	8.66361	-1.04945	1.09668	0.272782	0.424843	no
XLOC_000647	XLOC_000647	ISCW001018	DS620315:30193-56437	ISG	IL	OK	1.24737	1.80801	0.535508	-0.513423	0.607655	0.739171	no
XLOC_000648	XLOC_000648	ISCW000500	DS620358:1178-2194	ISG	IL	NOTEST	0	0	0	0	1	1	no
XLOC_000649	XLOC_000649	ISCW000501	DS620358:2377-12418	ISG	IL	OK	104.616	136.083	0.379389	-0.385697	0.699721	0.806867	no
XLOC_000650	XLOC_000650	ISCW001369	DS620359:22643-90587	ISG	IL	NOTEST	0	0	0	0	1	1	no
XLOC_000651	XLOC_000651	ISCW001370	DS620359:141625-142247	ISG	IL	NOTEST	0	0	0	0	1	1	no
XLOC_000652	XLOC_000652	ISCW016175	DS620365:13223-17335	ISG	IL	OK	0.831068	2.20842	1.40998	-1.42855	0.153132	0.285968	no
XLOC_000653	XLOC_000653	ISCW000735	DS620374:70891-96661	ISG	IL	NOTEST	0	0	0	0	1	1	no
XLOC_000654	XLOC_000654	-	DS620374:70891-96661	ISG	IL	NOTEST	0	0	0	0	1	1	no
XLOC_000655	XLOC_000655	ISCW001717	DS620492:2576-3113	ISG	IL	NOTEST	0	0	0	0	1	1	no
XLOC_000656	XLOC_000656	ISCW000525	DS620541:7625-11953	ISG	IL	OK	1.24098	2.09852	0.757901	-0.742939	0.457519	0.608522	no
XLOC_000657	XLOC_000657	ISCW001485	DS620566:13358-28181	ISG	IL	OK	3.90952	1.32222	-1.56403	1.59842	0.10995	0.22619	no
XLOC_000658	XLOC_000658	ISCW001486	DS620566:30159-33806	ISG	IL	OK	4.98101	50.5382	3.34286	-3.13495	0.00171886	0.0153533	yes
XLOC_000659	XLOC_000659	ISCW001487	DS620566:55577-103885	ISG	IL	OK	3.45821	0.902991	-1.93724	2.02543	0.0428236	0.113376	no
XLOC_000660	XLOC_000660	ISCW001489	DS620566:111630-120522	ISG	IL	OK	59.3666	55.3334	-0.101501	0.105826	0.915721	0.948641	no
XLOC_000661	XLOC_000661	ISCW001488	DS620566:110973-111378	ISG	IL	OK	77.5159	75.5144	-0.0377406	0.039848	0.968214	0.980797	no
XLOC_000662	XLOC_000662	ISCW001514	DS620588:3923-9102	ISG	IL	NOTEST	0	0	0	0	1	1	no
XLOC_000663	XLOC_000663	ISCW001583	DS620596:20903-117365	ISG	IL	OK	13.8077	3.28863	-2.06992	2.08905	0.0367034	0.103862	no
XLOC_000664	XLOC_000664	-	DS620596:20903-117365	ISG	IL	NOTEST	0	0	0	0	1	1	no
XLOC_000665	XLOC_000665	ISCW001585	DS620596:124722-184650	ISG	IL	OK	8.14916	2.85113	-1.51512	1.58766	0.112364	0.229919	no
XLOC_000666	XLOC_000666	ISCW000712	DS620613:41466-41539	ISG	IL	NOTEST	0	0	0	0	1	1	no
XLOC_000667	XLOC_000667	ISCW000713	DS620613:42371-287144	ISG	IL	NOTEST	0.951869	1.20723	0.342863	-0.332083	0.739826	1	no
XLOC_000668	XLOC_000668	ISCW000715	DS620613:393360-396507	ISG	IL	NOTEST	0	0	0	0	1	1	no
XLOC_000669	XLOC_000669	ISCW001425	DS620617:6796-22564	ISG	IL	NOTEST	0.510413	0.246607	-1.04945	0.842831	0.399323	1	no
XLOC_000670	XLOC_000670	ISCW001426	DS620617:25651-25807	ISG	IL	OK	12.3088	0	-1.79769e+308	-1.79769e+308	0.158655	0.285968	no
XLOC_000671	XLOC_000671	ISCW001107	DS620720:14976-46129	ISG	IL	OK	10.5608	61.9638	2.55271	-2.51835	0.0117905	0.0611323	no
XLOC_000672	XLOC_000672	ISCW000838	DS620747:18667-27833	ISG	IL	NOTEST	0	0	0	0	1	1	no
XLOC_000673	XLOC_000673	-	DS620852:141870-141953	ISG	IL	NOTEST	0	0	0	0	1	1	no
XLOC_000674	XLOC_000674	-	DS620852:149175-149257	ISG	IL	NOTEST	0	0	0	0	1	1	no
XLOC_000675	XLOC_000675	ISCW015751	DS620852:200468-204908	ISG	IL	OK	4.47677	0.240328	-4.21938	3.46385	0.000532493	0.00675101	yes
XLOC_000676	XLOC_000676	ISCW015752	DS620852:206696-207503	ISG	IL	OK	1.27237	0.307373	-2.04945	1.2732	0.202947	0.342495	no
XLOC_000677	XLOC_000677	ISCW015753	DS620852:214485-226960	ISG	IL	OK	25.9913	5.32751	-2.28649	2.36275	0.01814	0.069979	no
XLOC_000678	XLOC_000678	ISCW015755	DS620852:228619-246458	ISG	IL	OK	21.7427	12.0729	-0.848757	0.889415	0.37378	0.529603	no
XLOC_000679	XLOC_000679	ISCW015757	DS620852:277417-304431	ISG	IL	OK	46.5237	36.9047	-0.33416	0.329892	0.741481	0.835532	no
XLOC_000680	XLOC_000680	ISCW015747	DS620852:73725-73992	ISG	IL	OK	19.2321	8.13051	-1.2421	1.1551	0.248051	0.397666	no
XLOC_000681	XLOC_000681	ISCW015750	DS620852:179974-199808	ISG	IL	OK	12.2574	10.6365	-0.204624	0.212106	0.832024	0.89837	no
XLOC_000682	XLOC_000682	-	DS620852:214485-226960	ISG	IL	NOTEST	0	0	0	0	1	1	no
XLOC_000683	XLOC_000683	ISCW015756	DS620852:253745-272289	ISG	IL	OK	5.56894	5.65034	0.0209353	-0.0224695	0.982073	0.989567	no
XLOC_000684	XLOC_000684	ISCW000956	DS620898:41655-45874	ISG	IL	NOTEST	0	0	0	0	1	1	no
XLOC_000685	XLOC_000685	ISCW001435	DS620923:58608-62430	ISG	IL	OK	0	1.97603	1.79769e+308	1.79769e+308	0.158655	0.285968	no
XLOC_000686	XLOC_000686	ISCW001437	DS620923:172667-173567	ISG	IL	NOTEST	0	1.33028	1.79769e+308	1.79769e+308	0.0293909	1	no
XLOC_000687	XLOC_000687	ISCW001440	DS620923:268248-300957	ISG	IL	NOTEST	0	0	0	0	1	1	no
XLOC_000688	XLOC_000688	ISCW001441	DS620923:321064-345612	ISG	IL	OK	8.95021	3.9293	-1.18765	1.2532	0.210133	0.349973	no
XLOC_000689	XLOC_000689	ISCW001444	DS620923:351027-358564	ISG	IL	OK	5.53675	8.91695	0.687512	-0.734555	0.462611	0.613374	no
XLOC_000690	XLOC_000690	ISCW001436	DS620923:104077-104329	ISG	IL	NOTEST	0	0	0	0	1	1	no
XLOC_000691	XLOC_000691	-	DS620923:235978-236050	ISG	IL	NOTEST	0	0	0	0	1	1	no
XLOC_000692	XLOC_000692	-	DS620923:237686-237758	ISG	IL	NOTEST	0	0	0	0	1	1	no
XLOC_000693	XLOC_000693	-	DS620923:347830-347903	ISG	IL	NOTEST	0	0	0	0	1	1	no
XLOC_000694	XLOC_000694	ISCW001443	DS620923:349216-350552	ISG	IL	OK	14.5518	7.21255	-1.01262	1.07516	0.282305	0.43612	no
XLOC_000695	XLOC_000695	ISCW001445	DS620923:371729-403348	ISG	IL	NOTEST	0.201723	0.227413	0.172938	-0.131313	0.895528	1	no
XLOC_000696	XLOC_000696	ISCW001446	DS620923:437366-450671	ISG	IL	OK	17.6432	3.59715	-2.29419	2.37502	0.0175482	0.0689247	no
XLOC_000697	XLOC_000697	ISCW001447	DS620923:459982-460262	ISG	IL	OK	13.6829	0	-1.79769e+308	-1.79769e+308	0.0416323	0.11081	no
XLOC_000698	XLOC_000698	ISCW000631	DS620972:2263-2626	ISG	IL	NOTEST	0	0	0	0	1	1	no
XLOC_000699	XLOC_000699	ISCW001577	DS621007:29268-29341	ISG	IL	NOTEST	0	0	0	0	1	1	no
XLOC_000700	XLOC_000700	ISCW001578	DS621007:208318-209450	ISG	IL	NOTEST	0.265584	0	-1.79769e+308	-1.79769e+308	0.158655	1	no
XLOC_000701	XLOC_000701	ISCW000658	DS621023:55587-58021	ISG	IL	OK	0	4.90336	1.79769e+308	1.79769e+308	0.0194737	0.0705669	no
XLOC_000702	XLOC_000702	ISCW000837	DS621125:30648-30721	ISG	IL	NOTEST	0	0	0	0	1	1	no
XLOC_000703	XLOC_000703	ISCW001420	DS621127:94-11903	ISG	IL	NOTEST	0	0	0	0	1	1	no
XLOC_000704	XLOC_000704	ISCW000472	DS621176:27955-28117	ISG	IL	NOTEST	0	0	0	0	1	1	no
XLOC_000705	XLOC_000705	ISCW000474	DS621176:29490-56419	ISG	IL	OK	49.5113	51.2079	0.0486102	-0.0474207	0.962178	0.976136	no
XLOC_000706	XLOC_000706	ISCW000473	DS621176:28496-29119	ISG	IL	OK	6.03482	4.88068	-0.306229	0.322584	0.74701	0.839124	no
XLOC_000707	XLOC_000707	ISCW000475	DS621176:61041-162187	ISG	IL	OK	3.51129	5.67317	0.692156	-0.707487	0.479264	0.62886	no
XLOC_000708	XLOC_000708	ISCW001465	DS621179:1038-10568	ISG	IL	OK	20.4458	11.2605	-0.860532	0.913301	0.361084	0.517336	no
XLOC_000709	XLOC_000709	ISCW001466	DS621179:14176-14758	ISG	IL	OK	3.49389	0	-1.79769e+308	-1.79769e+308	0.0169474	0.0678946	no
XLOC_000710	XLOC_000710	ISCW001234	DS621205:9759-11761	ISG	IL	NOTEST	0	0.412849	1.79769e+308	1.79769e+308	0.158655	1	no
XLOC_000711	XLOC_000711	ISCW001233	DS621205:681-1437	ISG	IL	OK	1.19212	0.671972	-0.827062	0.650033	0.515671	0.662956	no
XLOC_000712	XLOC_000712	ISCW000589	DS621207:22755-25604	ISG	IL	NOTEST	0	0	0	0	1	1	no
XLOC_000713	XLOC_000713	ISCW001467	DS621211:12754-13333	ISG	IL	NOTEST	0	0	0	0	1	1	no
XLOC_000714	XLOC_000714	ISCW001468	DS621211:17896-18226	ISG	IL	NOTEST	0	0	0	0	1	1	no
XLOC_000715	XLOC_000715	ISCW000909	DS621235:1447-1529	ISG	IL	NOTEST	0	0	0	0	1	1	no
XLOC_000716	XLOC_000716	ISCW001473	DS621285:34612-37764	ISG	IL	OK	1.55927	46.5829	4.90086	-4.79851	1.5985e-06	8.59657e-05	yes
XLOC_000717	XLOC_000717	ISCW001475	DS621285:193484-202709	ISG	IL	OK	1.24928	5.88502	2.23595	-2.36955	0.0178099	0.0693396	no
XLOC_000718	XLOC_000718	ISCW001476	DS621285:203348-226755	ISG	IL	OK	2.14034	0.904845	-1.2421	1.00467	0.315057	0.471598	no
XLOC_000719	XLOC_000719	ISCW001448	DS621322:171-363	ISG	IL	OK	25.7149	0	-1.79769e+308	-1.79769e+308	0.0293909	0.0878738	no
XLOC_000720	XLOC_000720	ISCW001449	DS621322:10567-12907	ISG	IL	OK	13.9915	10.3104	-0.440444	0.461111	0.644719	0.768717	no
XLOC_000721	XLOC_000721	ISCW000005	DS621328:23562-23754	ISG	IL	NOTEST	0	0	0	0	1	1	no
XLOC_000722	XLOC_000722	ISCW000660	DS621436:57-3166	ISG	IL	NOTEST	0	0	0	0	1	1	no
XLOC_000723	XLOC_000723	ISCW000661	DS621436:4608-8787	ISG	IL	NOTEST	0	0	0	0	1	1	no
XLOC_000724	XLOC_000724	ISCW000662	DS621436:18527-34074	ISG	IL	NOTEST	0.112468	0	-1.79769e+308	-1.79769e+308	0.158655	1	no
XLOC_000725	XLOC_000725	ISCW024009	DS621444:328-2113	ISG	IL	NOTEST	0	0	0	0	1	1	no
XLOC_000726	XLOC_000726	ISCW000570	DS621580:8685-13237	ISG	IL	NOTEST	0	0	0	0	1	1	no
XLOC_000727	XLOC_000727	ISCW000256	DS621630:5785-17297	ISG	IL	NOTEST	0	0	0	0	1	1	no
XLOC_000728	XLOC_000728	ISCW001759	DS621675:2577-3029	ISG	IL	NOTEST	0	0	0	0	1	1	no
XLOC_000729	XLOC_000729	ISCW000248	DS621683:24603-24976	ISG	IL	NOTEST	0	0	0	0	1	1	no
XLOC_000730	XLOC_000730	ISCW016494	DS621691:237999-238269	ISG	IL	NOTEST	0	0	0	0	1	1	no
XLOC_000731	XLOC_000731	ISCW016490	DS621691:4672-176841	ISG	IL	NOTEST	0.205144	0.205573	0.00301338	-0.00184434	0.998528	1	no
XLOC_000732	XLOC_000732	ISCW015983	DS621767:1224-3192	ISG	IL	OK	0.68039	4.18385	2.6204	-2.76379	0.00571335	0.0362826	yes
XLOC_000733	XLOC_000733	ISCW015886	DS621823:165322-167753	ISG	IL	OK	2.05501	3.47508	0.757901	-0.742939	0.457519	0.608522	no
XLOC_000734	XLOC_000734	ISCW001507	DS621858:6045-6393	ISG	IL	OK	1.54689	0	-1.79769e+308	-1.79769e+308	0.0786496	0.175622	no
XLOC_000735	XLOC_000735	ISCW001508	DS621858:18893-33698	ISG	IL	OK	2.22811	1.25593	-0.827062	0.496471	0.619562	0.747603	no
XLOC_000736	XLOC_000736	ISCW000955	DS621888:2433-10579	ISG	IL	OK	0.465941	2.88904	2.63237	-2.44596	0.0144466	0.066059	no
XLOC_000737	XLOC_000737	ISCW001168	DS621961:107776-108125	ISG	IL	NOTEST	0	0	0	0	1	1	no
XLOC_000738	XLOC_000738	ISCW001173	DS621961:185773-186656	ISG	IL	OK	0.178196	2.42144	3.76433	-2.33584	0.0194995	0.0706157	no
XLOC_000739	XLOC_000739	ISCW001167	DS621961:32172-32245	ISG	IL	NOTEST	0	0	0	0	1	1	no
XLOC_000740	XLOC_000740	-	DS621961:150668-150741	ISG	IL	NOTEST	0	0	0	0	1	1	no
XLOC_000741	XLOC_000741	ISCW001170	DS621961:154140-161219	ISG	IL	OK	15.4155	5.49799	-1.48741	1.53365	0.125116	0.249342	no
XLOC_000742	XLOC_000742	ISCW001171	DS621961:164018-165275	ISG	IL	OK	19.8225	1.2285	-4.01217	4.01783	5.87376e-05	0.00136923	yes
XLOC_000743	XLOC_000743	ISCW001172	DS621961:166327-173594	ISG	IL	OK	30.4741	1.01044	-4.91452	4.72864	2.26032e-06	0.000112711	yes
XLOC_000744	XLOC_000744	ISCW016425	DS621989:68865-92519	ISG	IL	NOTEST	0	0	0	0	1	1	no
XLOC_000745	XLOC_000745	ISCW016424	DS621989:109-22903	ISG	IL	NOTEST	0	0	0	0	1	1	no
XLOC_000746	XLOC_000746	-	DS621989:110834-110907	ISG	IL	NOTEST	0	0	0	0	1	1	no
XLOC_000747	XLOC_000747	ISCW000277	DS622030:2195-2277	ISG	IL	NOTEST	0	0	0	0	1	1	no
XLOC_000748	XLOC_000748	ISCW000278	DS622030:4899-14339	ISG	IL	NOTEST	0	0	0	0	1	1	no
XLOC_000749	XLOC_000749	ISCW001681	DS622038:11569-13646	ISG	IL	NOTEST	0.931277	0	-1.79769e+308	-1.79769e+308	0.158655	1	no
XLOC_000750	XLOC_000750	ISCW001785	DS622131:96248-126746	ISG	IL	OK	26.9689	30.8218	0.192657	-0.192763	0.847145	0.908481	no
XLOC_000751	XLOC_000751	ISCW001784	DS622131:173-10734	ISG	IL	OK	274.789	130.336	-1.07609	1.06406	0.287303	0.441581	no
XLOC_000752	XLOC_000752	-	DS622131:127410-127483	ISG	IL	NOTEST	0	0	0	0	1	1	no
XLOC_000753	XLOC_000753	ISCW001787	DS622131:128662-134341	ISG	IL	OK	9.82636	12.4625	0.342863	-0.366145	0.714257	0.814782	no
XLOC_000754	XLOC_000754	ISCW000235	DS622145:12402-39675	ISG	IL	NOTEST	0	0	0	0	1	1	no
XLOC_000755	XLOC_000755	ISCW000234	DS622145:8527-9478	ISG	IL	NOTEST	0.146533	0.495581	1.7579	-0.994888	0.319791	1	no
XLOC_000756	XLOC_000756	ISCW000374	DS622189:78573-79746	ISG	IL	NOTEST	0	0	0	0	1	1	no
XLOC_000757	XLOC_000757	ISCW000375	DS622189:125788-140060	ISG	IL	NOTEST	0	0	0	0	1	1	no
XLOC_000758	XLOC_000758	ISCW000376	DS622189:223856-240625	ISG	IL	NOTEST	0	0	0	0	1	1	no
XLOC_000759	XLOC_000759	ISCW000378	DS622189:258956-301383	ISG	IL	NOTEST	0.209511	0	-1.79769e+308	-1.79769e+308	0.0163813	1	no
XLOC_000760	XLOC_000760	ISCW000379	DS622189:326376-330107	ISG	IL	NOTEST	0.244141	0.825698	1.7579	-0.994888	0.319791	1	no
XLOC_000761	XLOC_000761	ISCW000373	DS622189:6997-8559	ISG	IL	NOTEST	0	0	0	0	1	1	no
XLOC_000762	XLOC_000762	-	DS622189:223856-240625	ISG	IL	NOTEST	0	0	0	0	1	1	no
XLOC_000763	XLOC_000763	ISCW000380	DS622189:358634-386046	ISG	IL	NOTEST	0	0.762428	1.79769e+308	1.79769e+308	0.0786496	1	no
XLOC_000764	XLOC_000764	ISCW000382	DS622189:396776-399616	ISG	IL	OK	1.51557	1.28143	-0.242099	0.137017	0.891018	0.93453	no
XLOC_000765	XLOC_000765	ISCW001756	DS622207:36300-36497	ISG	IL	NOTEST	0	0	0	0	1	1	no
XLOC_000766	XLOC_000766	ISCW000688	DS622267:491-11787	ISG	IL	NOTEST	0	0	0	0	1	1	no
XLOC_000767	XLOC_000767	-	DS622267:37933-38008	ISG	IL	NOTEST	0	0	0	0	1	1	no
XLOC_000768	XLOC_000768	ISCW000689	DS622267:17383-26775	ISG	IL	NOTEST	0.178196	0.301335	0.757901	-0.371469	0.710288	1	no
XLOC_000769	XLOC_000769	ISCW001006	DS622295:5676-5749	ISG	IL	NOTEST	0	0	0	0	1	1	no
XLOC_000770	XLOC_000770	ISCW001526	DS622376:519-18342	ISG	IL	NOTEST	0.681637	0.164667	-2.04945	1.2732	0.202947	1	no
XLOC_000771	XLOC_000771	ISCW016351	DS622420:31230-32516	ISG	IL	OK	5.04952	23.3965	2.21208	-2.31368	0.0206852	0.073837	no
XLOC_000772	XLOC_000772	-	DS622420:37203-47954	ISG	IL	NOTEST	0	0	0	0	1	1	no
XLOC_000773	XLOC_000773	ISCW016354	DS622420:70582-70969	ISG	IL	OK	29.2633	0	-1.79769e+308	-1.79769e+308	0.015425	0.0668948	no
XLOC_000774	XLOC_000774	-	DS622420:82502-92255	ISG	IL	NOTEST	0	0	0	0	1	1	no
XLOC_000775	XLOC_000775	ISCW016358	DS622420:124869-135484	ISG	IL	OK	1.18808	0.669691	-0.827062	0.496471	0.619562	0.747603	no
XLOC_000776	XLOC_000776	ISCW016350	DS622420:1635-12033	ISG	IL	OK	99.2811	63.9017	-0.635665	0.645905	0.518341	0.664972	no
XLOC_000777	XLOC_000777	ISCW016352	DS622420:37203-47954	ISG	IL	OK	3.23593	0	-1.79769e+308	-1.79769e+308	0.015425	0.0668948	no
XLOC_000778	XLOC_000778	ISCW016355	DS622420:80703-81776	ISG	IL	OK	3.97847	5.04578	0.342863	-0.311163	0.755677	0.84497	no
XLOC_000779	XLOC_000779	ISCW016356	DS622420:82502-92255	ISG	IL	OK	1.91448	2.42808	0.342863	-0.332083	0.739826	0.834562	no
XLOC_000780	XLOC_000780	ISCW016359	DS622420:148827-149753	ISG	IL	OK	26.3186	5.23595	-2.32956	1.91024	0.0561019	0.139664	no
XLOC_000781	XLOC_000781	ISCW016360	DS622420:160803-161046	ISG	IL	OK	8.69715	0	-1.79769e+308	-1.79769e+308	0.0227501	0.0762482	no
XLOC_000782	XLOC_000782	ISCW016361	DS622420:171326-179952	ISG	IL	OK	13.1486	3.92376	-1.7446	1.63374	0.102313	0.214622	no
XLOC_000783	XLOC_000783	ISCW016362	DS622420:186407-194750	ISG	IL	OK	5.44551	1.41669	-1.94254	1.588	0.112286	0.229843	no
XLOC_000784	XLOC_000784	ISCW016363	DS622420:196082-198096	ISG	IL	OK	4.67414	1.97603	-1.2421	0.770064	0.441262	0.594623	no
XLOC_000785	XLOC_000785	ISCW016364	DS622420:201720-207918	ISG	IL	OK	4.30206	0	-1.79769e+308	-1.79769e+308	0.0227501	0.0762482	no
XLOC_000786	XLOC_000786	ISCW016365	DS622420:210832-211593	ISG	IL	OK	21.3171	2.32566	-3.1963	2.63281	0.0084681	0.0485134	yes
XLOC_000787	XLOC_000787	ISCW016366	DS622420:217586-217895	ISG	IL	OK	54.4601	7.08412	-2.94254	3.00464	0.00265898	0.0213556	yes
XLOC_000788	XLOC_000788	ISCW016367	DS622420:221438-226481	ISG	IL	OK	20.8682	0	-1.79769e+308	-1.79769e+308	0.0185281	0.070178	no
XLOC_000789	XLOC_000789	ISCW016368	DS622420:237921-242864	ISG	IL	OK	2.40529	0	-1.79769e+308	-1.79769e+308	0.0786496	0.175622	no
XLOC_000790	XLOC_000790	ISCW016369	DS622420:250055-252923	ISG	IL	OK	11.7292	0	-1.79769e+308	-1.79769e+308	0.0162914	0.0672943	no
XLOC_000791	XLOC_000791	ISCW016370	DS622420:257821-258220	ISG	IL	OK	5.70073	0	-1.79769e+308	-1.79769e+308	0.0185281	0.070178	no
XLOC_000792	XLOC_000792	ISCW016371	DS622420:281835-305176	ISG	IL	OK	1867.38	411.101	-2.18345	1.84259	0.0653882	0.157061	no
XLOC_000793	XLOC_000793	ISCW000430	DS622494:45540-45626	ISG	IL	NOTEST	0	0	0	0	1	1	no
XLOC_000794	XLOC_000794	ISCW000431	DS622494:144276-157441	ISG	IL	OK	0	2.41538	1.79769e+308	1.79769e+308	0.0786496	0.175622	no
XLOC_000795	XLOC_000795	ISCW000432	DS622494:210267-238098	ISG	IL	NOTEST	0	0.520183	1.79769e+308	1.79769e+308	0.158655	1	no
XLOC_000796	XLOC_000796	ISCW015956	DS622547:21558-46435	ISG	IL	NOTEST	0.233626	0.395068	0.757901	-0.525337	0.599349	1	no
XLOC_000797	XLOC_000797	ISCW015960	DS622547:117399-153321	ISG	IL	OK	13.9239	6.05462	-1.20146	1.26745	0.204995	0.344078	no
XLOC_000798	XLOC_000798	ISCW015962	DS622547:187358-199643	ISG	IL	OK	37.9724	20.053	-0.92113	0.938809	0.347829	0.502615	no
XLOC_000799	XLOC_000799	ISCW015963	DS622547:202095-233176	ISG	IL	OK	3.36148	0.733466	-2.1963	2.2492	0.0244997	0.0806739	no
XLOC_000800	XLOC_000800	ISCW015957	DS622547:49544-51129	ISG	IL	OK	5.36897	33.411	2.63761	-2.79382	0.00520893	0.0340406	yes
XLOC_000801	XLOC_000801	ISCW015958	DS622547:51983-81748	ISG	IL	OK	6.6436	7.45259	0.165779	-0.173987	0.861875	0.917643	no
XLOC_000802	XLOC_000802	ISCW015959	DS622547:89458-109155	ISG	IL	OK	15.6953	1.12941	-3.79669	3.8455	0.000120305	0.00233862	yes
XLOC_000803	XLOC_000803	ISCW015961	DS622547:160135-177153	ISG	IL	OK	4.05164	7.10333	0.809989	-0.82969	0.406714	0.563018	no
XLOC_000804	XLOC_000804	ISCW000654	DS622682:7080-9532	ISG	IL	NOTEST	0	0	0	0	1	1	no
XLOC_000805	XLOC_000805	ISCW000848	DS622764:2456-4070	ISG	IL	OK	2.8377	4.79864	0.757901	-0.371469	0.710288	0.812031	no
XLOC_000806	XLOC_000806	ISCW000849	DS622764:4103-10988	ISG	IL	OK	24.764	61.2043	1.30539	-1.31887	0.187212	0.323485	no
XLOC_000807	XLOC_000807	ISCW000850	DS622764:14246-17577	ISG	IL	OK	15.3432	5.02176	-1.61133	1.69389	0.0902861	0.19411	no
XLOC_000808	XLOC_000808	ISCW000851	DS622764:22881-35582	ISG	IL	OK	19.9617	4.1637	-2.26129	2.3498	0.0187833	0.0705669	no
XLOC_000809	XLOC_000809	ISCW000852	DS622764:43067-70639	ISG	IL	OK	4.98945	0.937479	-2.41202	2.50611	0.0122069	0.0625842	no
XLOC_000810	XLOC_000810	ISCW000854	DS622764:75371-103806	ISG	IL	OK	2.05967	0.74227	-1.4724	1.55414	0.120152	0.242013	no
XLOC_000811	XLOC_000811	ISCW000855	DS622764:104984-109968	ISG	IL	OK	3.11685	4.21654	0.435973	-0.455574	0.648697	0.771294	no
XLOC_000812	XLOC_000812	ISCW000856	DS622764:109983-111686	ISG	IL	OK	1.82047	15.5154	3.09132	-3.24831	0.00116091	0.0119951	yes
XLOC_000813	XLOC_000813	ISCW000859	DS622764:153146-180899	ISG	IL	OK	10.7861	7.47382	-0.529262	0.544694	0.585964	0.722781	no
XLOC_000814	XLOC_000814	ISCW000862	DS622764:196973-197414	ISG	IL	OK	14.4911	19.7619	0.447561	-0.480917	0.630576	0.756015	no
XLOC_000815	XLOC_000815	ISCW000863	DS622764:197486-197648	ISG	IL	NOTEST	0	0	0	0	1	1	no
XLOC_000816	XLOC_000816	ISCW000864	DS622764:198094-211734	ISG	IL	OK	19.8384	11.3583	-0.804542	0.843992	0.398674	0.555132	no
XLOC_000817	XLOC_000817	ISCW000866	DS622764:234792-239529	ISG	IL	OK	2.5216	1.50498	-0.744599	0.735578	0.461988	0.613115	no
XLOC_000818	XLOC_000818	ISCW000868	DS622764:269997-270966	ISG	IL	NOTEST	0.429198	1.45157	1.7579	-1.55869	0.11907	1	no
XLOC_000819	XLOC_000819	ISCW000869	DS622764:275853-299145	ISG	IL	OK	2.94987	0.287788	-3.35758	3.155	0.00160499	0.0147747	yes
XLOC_000820	XLOC_000820	ISCW000870	DS622764:300048-355681	ISG	IL	OK	4.61292	1.20854	-1.93241	2.02368	0.0430035	0.113747	no
XLOC_000821	XLOC_000821	ISCW000873	DS622764:376412-377204	ISG	IL	OK	2.61011	1.89162	-0.464492	0.456618	0.647946	0.770721	no
XLOC_000822	XLOC_000822	ISCW000857	DS622764:115613-130881	ISG	IL	NOTEST	0.74694	0.789436	0.079829	-0.0771518	0.938503	1	no
XLOC_000823	XLOC_000823	ISCW000858	DS622764:136180-152510	ISG	IL	NOTEST	0.193198	0	-1.79769e+308	-1.79769e+308	0.0786496	1	no
XLOC_000824	XLOC_000824	ISCW000860	DS622764:182234-183019	ISG	IL	NOTEST	0	0	0	0	1	1	no
XLOC_000825	XLOC_000825	ISCW000861	DS622764:184547-196352	ISG	IL	OK	4.40972	2.05709	-1.10008	1.14634	0.251656	0.402207	no
XLOC_000826	XLOC_000826	ISCW000865	DS622764:229489-232583	ISG	IL	OK	6.86289	2.50926	-1.45155	1.51243	0.130426	0.257019	no
XLOC_000827	XLOC_000827	ISCW000867	DS622764:239611-261262	ISG	IL	OK	1.09637	0.123599	-3.14899	2.96285	0.003048	0.023383	yes
XLOC_000828	XLOC_000828	ISCW000872	DS622764:361073-375814	ISG	IL	OK	103.8	99.7872	-0.0568842	0.0541351	0.956828	0.974241	no
XLOC_000829	XLOC_000829	ISCW000938	DS622941:269-1269	ISG	IL	NOTEST	0.137465	0.464915	1.7579	-0.994888	0.319791	1	no
XLOC_000830	XLOC_000830	ISCW000939	DS622941:1528-19552	ISG	IL	NOTEST	0	0.442631	1.79769e+308	1.79769e+308	0.158655	1	no
XLOC_000831	XLOC_000831	ISCW024055	DS622983:1-74	ISG	IL	NOTEST	0	0	0	0	1	1	no
XLOC_000832	XLOC_000832	ISCW024056	DS622983:102-7916	ISG	IL	NOTEST	0	0	0	0	1	1	no
XLOC_000833	XLOC_000833	ISCW001153	DS623045:4041-4114	ISG	IL	NOTEST	0	0	0	0	1	1	no
XLOC_000834	XLOC_000834	ISCW000163	DS623048:477-1617	ISG	IL	NOTEST	0	1.60159	1.79769e+308	1.79769e+308	0.0786496	1	no
XLOC_000835	XLOC_000835	ISCW001696	DS623071:53775-67550	ISG	IL	NOTEST	0	0	0	0	1	1	no
XLOC_000836	XLOC_000836	ISCW001695	DS623071:21488-26400	ISG	IL	NOTEST	0.0517154	1.22433	4.56526	-2.86563	0.00416184	1	no
XLOC_000837	XLOC_000837	ISCW015927	DS623090:49669-56603	ISG	IL	OK	5.70402	5.64624	-0.0146886	0.0155664	0.98758	0.991557	no
XLOC_000838	XLOC_000838	ISCW015929	DS623090:75099-86124	ISG	IL	OK	23.1208	17.4007	-0.410044	0.423257	0.672108	0.789335	no
XLOC_000839	XLOC_000839	ISCW015930	DS623090:86810-87895	ISG	IL	NOTEST	0.12414	0.419848	1.7579	-0.994888	0.319791	1	no
XLOC_000840	XLOC_000840	ISCW015933	DS623090:148219-154532	ISG	IL	NOTEST	0.133095	0.675203	2.34286	-1.40638	0.159611	1	no
XLOC_000841	XLOC_000841	ISCW015935	DS623090:239374-240445	ISG	IL	OK	3.28001	20.9063	2.67217	-2.82374	0.00474665	0.0318732	yes
XLOC_000842	XLOC_000842	ISCW015937	DS623090:438414-439398	ISG	IL	NOTEST	0	0.949006	1.79769e+308	1.79769e+308	0.0227501	1	no
XLOC_000843	XLOC_000843	ISCW015938	DS623090:550405-555732	ISG	IL	OK	1.99336	0	-1.79769e+308	-1.79769e+308	0.0194336	0.0705669	no
XLOC_000844	XLOC_000844	ISCW015939	DS623090:555763-558164	ISG	IL	OK	0.694961	12.5075	4.16971	-4.3104	1.62961e-05	0.000543198	yes
XLOC_000845	XLOC_000845	ISCW015926	DS623090:3928-49291	ISG	IL	OK	5.70622	2.18771	-1.38311	1.42937	0.152897	0.285968	no
XLOC_000846	XLOC_000846	ISCW015928	DS623090:57914-72797	ISG	IL	OK	26.1818	34.0805	0.38038	-0.381334	0.702955	0.80897	no
XLOC_000847	XLOC_000847	ISCW015931	DS623090:89616-90063	ISG	IL	OK	19.1399	23.1186	0.272474	-0.292484	0.769916	0.856223	no
XLOC_000848	XLOC_000848	ISCW015932	DS623090:133456-143334	ISG	IL	OK	11.3998	9.49899	-0.263161	0.280775	0.778883	0.862676	no
XLOC_000849	XLOC_000849	ISCW015934	DS623090:160741-227557	ISG	IL	OK	67.4587	7.37097	-3.19408	3.24065	0.00119258	0.0122451	yes
XLOC_000850	XLOC_000850	ISCW015936	DS623090:242241-275017	ISG	IL	OK	8.64385	1.11015	-2.96092	2.91788	0.00352419	0.0259428	yes
XLOC_000851	XLOC_000851	ISCW015940	DS623090:558193-595840	ISG	IL	OK	0.94406	4.68952	2.31249	-2.46035	0.0138802	0.066059	no
XLOC_000852	XLOC_000852	ISCW001765	DS623093:8340-8508	ISG	IL	NOTEST	0	0	0	0	1	1	no
XLOC_000853	XLOC_000853	ISCW001779	DS623212:6352-14907	ISG	IL	OK	3.76997	0.708347	-2.41202	1.5047	0.132401	0.259757	no
XLOC_000854	XLOC_000854	ISCW001780	DS623212:20875-24724	ISG	IL	OK	7.60701	4.55588	-0.739599	0.786739	0.431435	0.587036	no
XLOC_000855	XLOC_000855	ISCW024085	DS623242:176-5200	ISG	IL	OK	26.721	4.79245	-2.47914	2.53745	0.0111665	0.0586661	no
XLOC_000856	XLOC_000856	ISCW000191	DS623299:981-1058	ISG	IL	NOTEST	0	0	0	0	1	1	no
XLOC_000857	XLOC_000857	ISCW000192	DS623299:20360-60413	ISG	IL	OK	10.2495	0.247602	-5.37138	4.36007	1.30023e-05	0.000458842	yes
XLOC_000858	XLOC_000858	ISCW000193	DS623299:70907-95187	ISG	IL	OK	13.087	5.88577	-1.15283	1.22045	0.222294	0.36536	no
XLOC_000859	XLOC_000859	ISCW001520	DS623318:8827-17318	ISG	IL	OK	1.52264	0.735664	-1.04945	1.06175	0.288348	0.442535	no
XLOC_000860	XLOC_000860	ISCW001521	DS623318:24078-45916	ISG	IL	OK	113.025	69.1712	-0.708395	0.667619	0.504377	0.652753	no
XLOC_000861	XLOC_000861	ISCW001524	DS623318:75115-75340	ISG	IL	NOTEST	0	0	0	0	1	1	no
XLOC_000862	XLOC_000862	ISCW001522	DS623318:46748-55579	ISG	IL	OK	1.14015	2.89203	1.34286	-1.01964	0.307898	0.464203	no
XLOC_000863	XLOC_000863	ISCW001523	DS623318:57606-57882	ISG	IL	NOTEST	0	0	0	0	1	1	no
XLOC_000864	XLOC_000864	ISCW024081	DS623534:713-1571	ISG	IL	OK	2.28029	0	-1.79769e+308	-1.79769e+308	0.0227501	0.0762482	no
XLOC_000865	XLOC_000865	ISCW001272	DS623559:28848-37814	ISG	IL	NOTEST	0.742703	0	-1.79769e+308	-1.79769e+308	0.158655	1	no
XLOC_000866	XLOC_000866	ISCW000401	DS623626:1145-1318	ISG	IL	NOTEST	0	0	0	0	1	1	no
XLOC_000867	XLOC_000867	ISCW024067	DS623706:501-660	ISG	IL	OK	2487.42	3785.66	0.605898	-0.611749	0.540704	0.685003	no
XLOC_000868	XLOC_000868	ISCW000231	DS623723:49692-49761	ISG	IL	NOTEST	0	0	0	0	1	1	no
XLOC_000869	XLOC_000869	ISCW000147	DS623750:38598-38671	ISG	IL	NOTEST	0	0	0	0	1	1	no
XLOC_000870	XLOC_000870	ISCW001710	DS623771:1157-11076	ISG	IL	OK	16.5733	10.0893	-0.71603	0.746048	0.455638	0.607288	no
XLOC_000871	XLOC_000871	ISCW000268	DS623907:5136-8132	ISG	IL	NOTEST	0	0	0	0	1	1	no
XLOC_000872	XLOC_000872	ISCW000335	DS623913:61-5656	ISG	IL	OK	13.6401	26.9101	0.980293	-1.0437	0.296623	0.452733	no
XLOC_000873	XLOC_000873	ISCW000336	DS623913:5849-6188	ISG	IL	NOTEST	0	0	0	0	1	1	no
XLOC_000874	XLOC_000874	ISCW000338	DS623913:20511-42568	ISG	IL	OK	42.9049	10.2601	-2.0641	2.09538	0.0361371	0.102654	no
XLOC_000875	XLOC_000875	ISCW000339	DS623913:53208-92715	ISG	IL	OK	2.20285	0.120164	-4.1963	2.64629	0.00813805	0.0470677	yes
XLOC_000876	XLOC_000876	ISCW000337	DS623913:12099-14914	ISG	IL	NOTEST	0.50659	0.856659	0.757901	-0.371469	0.710288	1	no
XLOC_000877	XLOC_000877	ISCW000340	DS623913:113472-158944	ISG	IL	OK	67.7071	2.88862	-4.55085	4.4906	7.10225e-06	0.000283818	yes
XLOC_000878	XLOC_000878	ISCW000280	DS624009:39415-42060	ISG	IL	OK	3.93512	0.66544	-2.56403	2.41604	0.0156902	0.0672943	no
XLOC_000879	XLOC_000879	-	DS624009:42797-42879	ISG	IL	NOTEST	0	0	0	0	1	1	no
XLOC_000880	XLOC_000880	ISCW015554	DS624019:19922-34288	ISG	IL	OK	5.64714	0.666243	-3.0834	2.90136	0.00371549	0.0268851	yes
XLOC_000881	XLOC_000881	ISCW000903	DS624020:12218-14559	ISG	IL	OK	1.93939	0.690434	-1.49003	1.55204	0.120652	0.242267	no
XLOC_000882	XLOC_000882	ISCW016422	DS624113:52521-56738	ISG	IL	NOTEST	0	0	0	0	1	1	no
XLOC_000883	XLOC_000883	ISCW016421	DS624113:33804-44136	ISG	IL	NOTEST	0	0	0	0	1	1	no
XLOC_000884	XLOC_000884	ISCW016423	DS624113:69964-71855	ISG	IL	NOTEST	0	0	0	0	1	1	no
XLOC_000885	XLOC_000885	ISCW024014	DS624178:624-888	ISG	IL	NOTEST	0	0	0	0	1	1	no
XLOC_000886	XLOC_000886	ISCW015764	DS624285:61138-69204	ISG	IL	NOTEST	0	0	0	0	1	1	no
XLOC_000887	XLOC_000887	ISCW015768	DS624285:665231-665852	ISG	IL	NOTEST	0	0	0	0	1	1	no
XLOC_000888	XLOC_000888	ISCW015765	DS624285:266366-268694	ISG	IL	OK	0.649402	2.19631	1.7579	-1.55869	0.11907	0.240891	no
XLOC_000889	XLOC_000889	ISCW015766	DS624285:395666-405036	ISG	IL	NOTEST	0.230201	0.778551	1.7579	-0.994888	0.319791	1	no
XLOC_000890	XLOC_000890	ISCW015767	DS624285:427716-430865	ISG	IL	NOTEST	0.714175	0	-1.79769e+308	-1.79769e+308	0.158655	1	no
XLOC_000891	XLOC_000891	ISCW024013	DS624291:9-561	ISG	IL	OK	0.712259	15.524	4.44596	-3.08447	0.00203918	0.0176642	yes
XLOC_000892	XLOC_000892	ISCW001719	DS624461:5032-7595	ISG	IL	NOTEST	0	0	0	0	1	1	no
XLOC_000893	XLOC_000893	ISCW000312	DS624465:2491-61617	ISG	IL	OK	1.18871	2.03527	0.775823	-0.723061	0.469643	0.61976	no
XLOC_000894	XLOC_000894	ISCW000316	DS624465:138285-190639	ISG	IL	NOTEST	0.0524868	0.133135	1.34286	-1.01964	0.307898	1	no
XLOC_000895	XLOC_000895	ISCW000314	DS624465:88476-93183	ISG	IL	OK	2.0789	2.59035	0.317328	-0.335462	0.737277	0.832951	no
XLOC_000896	XLOC_000896	ISCW000315	DS624465:95455-95680	ISG	IL	NOTEST	0	0	0	0	1	1	no
XLOC_000897	XLOC_000897	ISCW016117	DS624476:15967-41821	ISG	IL	OK	84.0969	70.4011	-0.256454	0.248932	0.803413	0.880155	no
XLOC_000898	XLOC_000898	ISCW016119	DS624476:365653-424127	ISG	IL	OK	28.4872	6.82334	-2.06177	2.1183	0.0341494	0.0986549	no
XLOC_000899	XLOC_000899	ISCW016122	DS624476:452658-454854	ISG	IL	OK	4.1617	16.7605	2.00982	-2.07764	0.0377422	0.106172	no
XLOC_000900	XLOC_000900	ISCW016123	DS624476:512414-558778	ISG	IL	NOTEST	0	0	0	0	1	1	no
XLOC_000901	XLOC_000901	ISCW016118	DS624476:321524-346460	ISG	IL	OK	380.374	188.067	-1.01617	0.923665	0.355661	0.512088	no
XLOC_000902	XLOC_000902	-	DS624476:365653-424127	ISG	IL	NOTEST	0	0	0	0	1	1	no
XLOC_000903	XLOC_000903	-	DS624476:365653-424127	ISG	IL	NOTEST	0	0	0	0	1	1	no
XLOC_000904	XLOC_000904	ISCW000659	DS624527:11616-52231	ISG	IL	NOTEST	0.271547	0	-1.79769e+308	-1.79769e+308	0.158655	1	no
XLOC_000905	XLOC_000905	ISCW001019	DS624538:92180-92253	ISG	IL	NOTEST	0	0	0	0	1	1	no
XLOC_000906	XLOC_000906	ISCW001020	DS624538:211354-211528	ISG	IL	NOTEST	0	0	0	0	1	1	no
XLOC_000907	XLOC_000907	ISCW001021	DS624538:280214-290261	ISG	IL	OK	203.772	477.517	1.22859	-1.19544	0.231916	0.378463	no
XLOC_000908	XLOC_000908	ISCW001809	DS624571:79214-96814	ISG	IL	NOTEST	0.429198	0.241929	-0.827062	0.496471	0.619562	1	no
XLOC_000909	XLOC_000909	ISCW001810	DS624571:108597-115204	ISG	IL	OK	12.368	29.1164	1.23522	-1.31312	0.189143	0.325963	no
XLOC_000910	XLOC_000910	ISCW001814	DS624571:144763-168323	ISG	IL	OK	71.3053	63.5809	-0.165416	0.155192	0.87667	0.92677	no
XLOC_000911	XLOC_000911	ISCW001816	DS624571:171468-173848	ISG	IL	OK	535.334	301.485	-0.828352	0.731995	0.464172	0.614804	no
XLOC_000912	XLOC_000912	ISCW001818	DS624571:216511-249128	ISG	IL	OK	36.1284	45.2912	0.326095	-0.324114	0.745852	0.838727	no
XLOC_000913	XLOC_000913	ISCW001811	DS624571:119552-125383	ISG	IL	OK	6248.89	12756.2	1.02952	-0.783261	0.433474	0.589111	no
XLOC_000914	XLOC_000914	ISCW001813	DS624571:142148-143162	ISG	IL	OK	20.2616	14.3904	-0.493638	0.513959	0.607281	0.739171	no
XLOC_000915	XLOC_000915	ISCW001815	DS624571:144763-168323	ISG	IL	OK	8.89728	0	-1.79769e+308	-1.79769e+308	0.158655	0.285968	no
XLOC_000916	XLOC_000916	ISCW001817	DS624571:175158-198128	ISG	IL	OK	1.69784	1.73601	0.0320758	-0.0343935	0.972563	0.983453	no
XLOC_000917	XLOC_000917	ISCW001819	DS624571:256902-366800	ISG	IL	OK	206.8	26.6114	-2.95812	2.64684	0.00812471	0.0470677	yes
XLOC_000918	XLOC_000918	ISCW000072	DS624596:98479-125588	ISG	IL	OK	52.2397	26.7783	-0.964081	0.94005	0.347192	0.502274	no
XLOC_000919	XLOC_000919	ISCW000071	DS624596:43348-98209	ISG	IL	OK	16.3922	16.0048	-0.0345037	0.0340566	0.972832	0.983638	no
XLOC_000920	XLOC_000920	ISCW000073	DS624596:286575-288876	ISG	IL	NOTEST	0	0	0	0	1	1	no
XLOC_000921	XLOC_000921	ISCW000145	DS624614:1301-5354	ISG	IL	NOTEST	0	0	0	0	1	1	no
XLOC_000922	XLOC_000922	ISCW000146	DS624614:9630-10170	ISG	IL	NOTEST	0	0	0	0	1	1	no
XLOC_000923	XLOC_000923	ISCW001073	DS624616:9924-10386	ISG	IL	NOTEST	0	0	0	0	1	1	no
XLOC_000924	XLOC_000924	ISCW015623	DS624661:51722-51795	ISG	IL	NOTEST	0	0	0	0	1	1	no
XLOC_000925	XLOC_000925	ISCW000785	DS624715:9403-9838	ISG	IL	NOTEST	0	0	0	0	1	1	no
XLOC_000926	XLOC_000926	ISCW000786	DS624715:14995-18438	ISG	IL	NOTEST	0	0	0	0	1	1	no
XLOC_000927	XLOC_000927	ISCW001419	DS624726:37392-38148	ISG	IL	NOTEST	0	0	0	0	1	1	no
XLOC_000928	XLOC_000928	ISCW000675	DS624783:4750-4823	ISG	IL	NOTEST	0	0	0	0	1	1	no
XLOC_000929	XLOC_000929	ISCW000679	DS624783:96349-107883	ISG	IL	OK	6.26414	2.75414	-1.18552	1.25411	0.209803	0.349489	no
XLOC_000930	XLOC_000930	ISCW000676	DS624783:14094-89337	ISG	IL	OK	5.45209	1.82367	-1.57997	1.66432	0.0960478	0.203995	no
XLOC_000931	XLOC_000931	ISCW000677	DS624783:92628-93021	ISG	IL	OK	28.2458	65.6761	1.21733	-1.29615	0.194924	0.333569	no
XLOC_000932	XLOC_000932	ISCW000678	DS624783:93697-95653	ISG	IL	OK	10.4627	2.84349	-1.87953	1.96259	0.0496943	0.127172	no
XLOC_000933	XLOC_000933	ISCW000680	DS624783:112093-203833	ISG	IL	OK	18.1438	24.3908	0.426862	-0.428389	0.668368	0.786811	no
XLOC_000934	XLOC_000934	ISCW024031	DS624813:581-1073	ISG	IL	NOTEST	0	0	0	0	1	1	no
XLOC_000935	XLOC_000935	ISCW000564	DS624815:21016-55327	ISG	IL	NOTEST	0	0	0	0	1	1	no
XLOC_000936	XLOC_000936	ISCW001686	DS624841:5222-19422	ISG	IL	OK	11.9801	1.76862	-2.75995	2.85093	0.00435912	0.0300088	yes
XLOC_000937	XLOC_000937	ISCW001687	DS624841:27496-28323	ISG	IL	OK	119.982	11.2718	-3.41202	2.1474	0.0317611	0.0929019	no
XLOC_000938	XLOC_000938	ISCW001685	DS624841:3476-3618	ISG	IL	OK	19.0458	225.449	3.56526	-2.21488	0.0267686	0.0850677	no
XLOC_000939	XLOC_000939	ISCW000977	DS624854:75608-91125	ISG	IL	OK	2.75055	5.38566	0.969405	-1.03975	0.298457	0.454763	no
XLOC_000940	XLOC_000940	ISCW000978	DS624854:93281-98171	ISG	IL	OK	1.35077	1.82735	0.435973	-0.443456	0.657436	0.778328	no
XLOC_000941	XLOC_000941	ISCW000980	DS624854:103983-114007	ISG	IL	OK	54.4416	120.049	1.14084	-1.13911	0.254659	0.40537	no
XLOC_000942	XLOC_000942	ISCW000982	DS624854:121636-141680	ISG	IL	OK	13.4895	26.0699	0.950546	-1.00257	0.316067	0.472863	no
XLOC_000943	XLOC_000943	ISCW000984	DS624854:151636-175304	ISG	IL	OK	6.16245	4.23706	-0.54044	0.558991	0.576168	0.714408	no
XLOC_000944	XLOC_000944	ISCW000987	DS624854:199636-199906	ISG	IL	OK	831.36	1348.26	0.697551	-0.679956	0.496532	0.645196	no
XLOC_000945	XLOC_000945	ISCW000979	DS624854:100691-103722	ISG	IL	OK	3418.02	4633.65	0.43899	-0.334977	0.737643	0.833253	no
XLOC_000946	XLOC_000946	ISCW000981	DS624854:116770-119775	ISG	IL	OK	52.8276	22.3332	-1.2421	1.31427	0.188757	0.325478	no
XLOC_000947	XLOC_000947	ISCW000983	DS624854:141788-142586	ISG	IL	OK	145.118	149.565	0.0435464	-0.0464932	0.962917	0.976627	no
XLOC_000948	XLOC_000948	ISCW000985	DS624854:175642-190396	ISG	IL	OK	3.01016	6.61735	1.13641	-1.221	0.222088	0.365127	no
XLOC_000949	XLOC_000949	ISCW000986	DS624854:198576-199591	ISG	IL	OK	291.81	404.485	0.47106	-0.430242	0.66702	0.785749	no
XLOC_000950	XLOC_000950	ISCW000988	DS624854:219787-247136	ISG	IL	OK	0.989754	5.26021	2.40998	-2.48035	0.0131252	0.0656776	no
XLOC_000951	XLOC_000951	ISCW000989	DS624854:306869-317671	ISG	IL	NOTEST	0	0	0	0	1	1	no
XLOC_000952	XLOC_000952	ISCW000990	DS624854:369761-434408	ISG	IL	NOTEST	0	0.227031	1.79769e+308	1.79769e+308	0.134611	1	no
XLOC_000953	XLOC_000953	ISCW000992	DS624854:449060-461933	ISG	IL	OK	0.458376	1.93782	2.07983	-2.04789	0.0405706	0.11081	no
XLOC_000954	XLOC_000954	ISCW000993	DS624854:468312-468765	ISG	IL	NOTEST	0	0	0	0	1	1	no
XLOC_000955	XLOC_000955	ISCW000371	DS624864:2426-2842	ISG	IL	OK	1.37529	10.4655	2.92783	-2.36785	0.0178916	0.0693894	no
XLOC_000956	XLOC_000956	ISCW024029	DS624897:53-1453	ISG	IL	NOTEST	0	0	0	0	1	1	no
XLOC_000957	XLOC_000957	ISCW001344	DS624920:1072-1498	ISG	IL	NOTEST	0	0.844877	1.79769e+308	1.79769e+308	0.158655	1	no
XLOC_000958	XLOC_000958	ISCW024044	DS624922:269-1175	ISG	IL	NOTEST	0	0	0	0	1	1	no
XLOC_000959	XLOC_000959	ISCW001546	DS624935:21803-22142	ISG	IL	NOTEST	0	0	0	0	1	1	no
XLOC_000960	XLOC_000960	ISCW024093	DS624946:623-875	ISG	IL	NOTEST	0	0	0	0	1	1	no
XLOC_000961	XLOC_000961	ISCW000384	DS624999:24998-29972	ISG	IL	OK	61.5602	37.0931	-0.730846	0.721966	0.470315	0.620362	no
XLOC_000962	XLOC_000962	ISCW000533	DS625041:4844-31981	ISG	IL	NOTEST	0	0	0	0	1	1	no
XLOC_000963	XLOC_000963	ISCW000534	DS625041:33250-33454	ISG	IL	NOTEST	0	0	0	0	1	1	no
XLOC_000964	XLOC_000964	ISCW000535	DS625041:41962-56530	ISG	IL	NOTEST	0	0	0	0	1	1	no
XLOC_000965	XLOC_000965	ISCW000537	DS625041:61280-102602	ISG	IL	NOTEST	0.149397	0.336846	1.17294	-1.06449	0.287106	1	no
XLOC_000966	XLOC_000966	ISCW015778	DS625086:17801-21302	ISG	IL	OK	20.248	0	-1.79769e+308	-1.79769e+308	0.0142009	0.066059	no
XLOC_000967	XLOC_000967	ISCW001627	DS625122:10107-10803	ISG	IL	NOTEST	0.892491	0	-1.79769e+308	-1.79769e+308	0.0227501	1	no
XLOC_000968	XLOC_000968	ISCW001608	DS625176:19011-19201	ISG	IL	NOTEST	0	0	0	0	1	1	no
XLOC_000969	XLOC_000969	-	DS625176:325094-325208	ISG	IL	NOTEST	0	0	0	0	1	1	no
XLOC_000970	XLOC_000970	ISCW000759	DS625236:25390-37565	ISG	IL	OK	62.0131	13.6152	-2.18736	2.18659	0.0287721	0.0878738	no
XLOC_000971	XLOC_000971	ISCW000760	DS625238:8906-9155	ISG	IL	NOTEST	0	0	0	0	1	1	no
XLOC_000972	XLOC_000972	ISCW001246	DS625266:97714-97796	ISG	IL	NOTEST	0	0	0	0	1	1	no
XLOC_000973	XLOC_000973	ISCW024037	DS625299:221-419	ISG	IL	NOTEST	0	0	0	0	1	1	no
XLOC_000974	XLOC_000974	ISCW001068	DS625300:9208-10577	ISG	IL	NOTEST	0	0	0	0	1	1	no
XLOC_000975	XLOC_000975	ISCW000038	DS625393:153086-153243	ISG	IL	NOTEST	0	0	0	0	1	1	no
XLOC_000976	XLOC_000976	ISCW000037	DS625393:115442-115515	ISG	IL	NOTEST	0	0	0	0	1	1	no
XLOC_000977	XLOC_000977	ISCW001450	DS625419:14448-14797	ISG	IL	NOTEST	0	1.29898	1.79769e+308	1.79769e+308	0.158655	1	no
XLOC_000978	XLOC_000978	ISCW001108	DS625431:558-2755	ISG	IL	NOTEST	0.0574468	0	-1.79769e+308	-1.79769e+308	0.158655	1	no
XLOC_000979	XLOC_000979	ISCW001109	DS625431:3938-4636	ISG	IL	NOTEST	0.444424	0	-1.79769e+308	-1.79769e+308	0.0786496	1	no
XLOC_000980	XLOC_000980	ISCW000795	DS625438:1144-14759	ISG	IL	OK	25.7941	21.2198	-0.281627	0.287658	0.773609	0.858492	no
XLOC_000981	XLOC_000981	ISCW024046	DS625513:728-1205	ISG	IL	OK	3.25337	6.86537	1.0774	-1.08185	0.279318	0.432788	no
XLOC_000982	XLOC_000982	ISCW000634	DS625547:612-13210	ISG	IL	OK	4.36906	3.6941	-0.242099	0.214664	0.83003	0.897484	no
XLOC_000983	XLOC_000983	ISCW001022	DS625587:7044-19401	ISG	IL	OK	4.88281	22.2938	2.19086	-2.34071	0.019247	0.0705669	no
XLOC_000984	XLOC_000984	ISCW001023	DS625587:27487-50203	ISG	IL	NOTEST	0	0	0	0	1	1	no
XLOC_000985	XLOC_000985	ISCW000705	DS625605:66434-96864	ISG	IL	OK	22.1703	36.4155	0.715929	-0.71587	0.474072	0.624242	no
XLOC_000986	XLOC_000986	ISCW000707	DS625605:109615-121304	ISG	IL	OK	3.53028	2.31089	-0.611333	0.645949	0.518313	0.664972	no
XLOC_000987	XLOC_000987	ISCW000708	DS625605:122631-123566	ISG	IL	OK	0.544516	1.84159	1.7579	-0.994888	0.319791	0.475234	no
XLOC_000988	XLOC_000988	ISCW000701	DS625605:1126-42811	ISG	IL	OK	1.71514	11.6014	2.7579	-2.92624	0.00343091	0.0254193	yes
XLOC_000989	XLOC_000989	ISCW000703	DS625605:48631-49778	ISG	IL	OK	3.13044	19.214	2.61772	-2.76645	0.00566707	0.0361087	yes
XLOC_000990	XLOC_000990	ISCW000704	DS625605:52351-65530	ISG	IL	OK	32.1264	7.98164	-2.009	2.05148	0.0402207	0.11081	no
XLOC_000991	XLOC_000991	ISCW000706	DS625605:97226-106228	ISG	IL	OK	10.3183	18.5167	0.843631	-0.876907	0.380537	0.536494	no
XLOC_000992	XLOC_000992	ISCW000709	DS625605:128080-129371	ISG	IL	OK	3.38889	2.3281	-0.541659	0.574602	0.565561	0.705275	no
XLOC_000993	XLOC_000993	ISCW000448	DS625645:6618-15556	ISG	IL	NOTEST	0	0	0	0	1	1	no
XLOC_000994	XLOC_000994	ISCW000449	DS625645:73387-83442	ISG	IL	NOTEST	0	0	0	0	1	1	no
XLOC_000995	XLOC_000995	ISCW001214	DS625723:5103-32049	ISG	IL	NOTEST	0	0.19946	1.79769e+308	1.79769e+308	0.158655	1	no
XLOC_000996	XLOC_000996	ISCW001215	DS625723:63533-71496	ISG	IL	NOTEST	0	0.168742	1.79769e+308	1.79769e+308	0.158655	1	no
XLOC_000997	XLOC_000997	ISCW001216	DS625723:96826-126366	ISG	IL	NOTEST	0	0.103016	1.79769e+308	1.79769e+308	0.158655	1	no
XLOC_000998	XLOC_000998	ISCW001689	DS625821:27752-56817	ISG	IL	OK	8.15013	7.83382	-0.0571076	0.0602366	0.951967	0.971426	no
XLOC_000999	XLOC_000999	ISCW000700	DS625830:1716-10684	ISG	IL	OK	4.66602	23.6711	2.34286	-1.84139	0.0655651	0.157082	no
XLOC_001000	XLOC_001000	ISCW001427	DS625912:2558-22374	ISG	IL	OK	35.237	7.39699	-2.25208	2.32827	0.0198975	0.0715375	no
XLOC_001001	XLOC_001001	ISCW001066	DS625933:11090-11377	ISG	IL	NOTEST	0	0	0	0	1	1	no
XLOC_001002	XLOC_001002	ISCW001242	DS626007:11513-11595	ISG	IL	NOTEST	0	0	0	0	1	1	no
XLOC_001003	XLOC_001003	-	DS626007:20099-20172	ISG	IL	NOTEST	0	0	0	0	1	1	no
XLOC_001004	XLOC_001004	ISCW001244	DS626007:90641-91544	ISG	IL	NOTEST	0	0	0	0	1	1	no
XLOC_001005	XLOC_001005	ISCW000279	DS626063:4006-5596	ISG	IL	OK	0	1.94537	1.79769e+308	1.79769e+308	0.0416323	0.11081	no
XLOC_001006	XLOC_001006	ISCW001515	DS626083:49721-50462	ISG	IL	OK	9.39689	0.345444	-4.76566	3.00322	0.00267143	0.0214107	yes
XLOC_001007	XLOC_001007	ISCW001516	DS626083:54196-70021	ISG	IL	NOTEST	0.187701	0	-1.79769e+308	-1.79769e+308	0.0786496	1	no
XLOC_001008	XLOC_001008	ISCW000091	DS626116:10248-10911	ISG	IL	NOTEST	0	0	0	0	1	1	no
XLOC_001009	XLOC_001009	ISCW000606	DS626219:6964-8056	ISG	IL	NOTEST	0	0.416523	1.79769e+308	1.79769e+308	0.0786496	1	no
XLOC_001010	XLOC_001010	ISCW000006	DS626373:8575-12293	ISG	IL	NOTEST	0	0	0	0	1	1	no
XLOC_001011	XLOC_001011	ISCW000308	DS626378:42892-43155	ISG	IL	NOTEST	0	0	0	0	1	1	no
XLOC_001012	XLOC_001012	ISCW016585	DS626389:57266-81868	ISG	IL	OK	166.99	293.117	0.811713	-0.773904	0.438987	0.593915	no
XLOC_001013	XLOC_001013	ISCW016584	DS626389:17149-55126	ISG	IL	OK	30.9388	54.3306	0.812349	-0.827936	0.407707	0.563896	no
XLOC_001014	XLOC_001014	ISCW016587	DS626389:86356-113708	ISG	IL	OK	1.39726	0.3938	-1.82706	1.4902	0.136173	0.264527	no
XLOC_001015	XLOC_001015	ISCW016588	DS626389:135102-240499	ISG	IL	NOTEST	0.735611	0.62197	-0.242099	0.214664	0.83003	1	no
XLOC_001016	XLOC_001016	ISCW016590	DS626389:254152-287848	ISG	IL	NOTEST	0.488193	0	-1.79769e+308	-1.79769e+308	0.0293909	1	no
XLOC_001017	XLOC_001017	ISCW016461	DS626398:8149-13722	ISG	IL	NOTEST	0.382324	0.808152	1.07983	-1.02812	0.303895	1	no
XLOC_001018	XLOC_001018	ISCW016462	DS626398:62354-75689	ISG	IL	OK	0.396378	3.35143	3.07983	-2.87563	0.00403227	0.0286708	yes
XLOC_001019	XLOC_001019	ISCW016460	DS626398:1323-1395	ISG	IL	NOTEST	0	0	0	0	1	1	no
XLOC_001020	XLOC_001020	ISCW000940	DS626400:5477-5547	ISG	IL	NOTEST	0	0	0	0	1	1	no
XLOC_001021	XLOC_001021	ISCW001579	DS626425:9308-11997	ISG	IL	OK	1.84772	0	-1.79769e+308	-1.79769e+308	0.0162914	0.0672943	no
XLOC_001022	XLOC_001022	ISCW001580	DS626425:68098-74016	ISG	IL	NOTEST	0.183606	0	-1.79769e+308	-1.79769e+308	0.158655	1	no
XLOC_001023	XLOC_001023	ISCW024068	DS626432:1481-2947	ISG	IL	OK	16.2894	82.6377	2.34286	-2.4749	0.0133273	0.066059	no
XLOC_001024	XLOC_001024	ISCW000586	DS626490:135-555	ISG	IL	NOTEST	0	0	0	0	1	1	no
XLOC_001025	XLOC_001025	ISCW016414	DS626493:26381-44685	ISG	IL	OK	46.4322	22.7432	-1.02969	1.05297	0.292354	0.447307	no
XLOC_001026	XLOC_001026	ISCW016416	DS626493:56691-74390	ISG	IL	OK	33.7057	2.36831	-3.83106	3.90282	9.50799e-05	0.00197192	yes
XLOC_001027	XLOC_001027	ISCW016417	DS626493:117231-180873	ISG	IL	NOTEST	0	0.224245	1.79769e+308	1.79769e+308	0.158655	1	no
XLOC_001028	XLOC_001028	ISCW016415	DS626493:44752-55734	ISG	IL	OK	7.28147	7.54679	0.0516321	-0.0551582	0.956012	0.973671	no
XLOC_001029	XLOC_001029	ISCW016418	DS626493:383281-389854	ISG	IL	OK	7.35471	0.672271	-3.45155	3.37602	0.000735419	0.00854218	yes
XLOC_001030	XLOC_001030	ISCW016419	DS626493:442102-444245	ISG	IL	OK	12.5198	1.47707	-3.0834	2.90136	0.00371549	0.0268851	yes
XLOC_001031	XLOC_001031	ISCW016420	DS626493:492879-496710	ISG	IL	OK	1.94821	0.732105	-1.41202	1.14196	0.25347	0.403981	no
XLOC_001032	XLOC_001032	ISCW000455	DS626564:74391-89869	ISG	IL	OK	40.0155	2.83523	-3.81902	3.89121	9.97444e-05	0.0020428	yes
XLOC_001033	XLOC_001033	-	DS626564:74391-89869	ISG	IL	NOTEST	0	0	0	0	1	1	no
XLOC_001034	XLOC_001034	ISCW001113	DS626580:32275-106450	ISG	IL	OK	31.0278	2.17824	-3.83233	3.80072	0.000144274	0.00263179	yes
XLOC_001035	XLOC_001035	ISCW001115	DS626580:131986-156040	ISG	IL	OK	48.4867	3.59616	-3.75306	3.80636	0.000141027	0.00261299	yes
XLOC_001036	XLOC_001036	ISCW001116	DS626580:291714-341796	ISG	IL	OK	19.8152	5.5271	-1.84201	1.93313	0.05322	0.134653	no
XLOC_001037	XLOC_001037	ISCW001117	DS626580:423614-444780	ISG	IL	OK	46.0623	14.1079	-1.70708	1.67734	0.0934763	0.199791	no
XLOC_001038	XLOC_001038	-	DS626580:32275-106450	ISG	IL	NOTEST	0	0	0	0	1	1	no
XLOC_001039	XLOC_001039	ISCW001257	DS626633:552-15456	ISG	IL	OK	14.943	0	-1.79769e+308	-1.79769e+308	0.0194737	0.0705669	no
XLOC_001040	XLOC_001040	ISCW001702	DS626687:1224-3904	ISG	IL	OK	1.48876	18.9503	3.67004	-3.78077	0.000156344	0.00277142	yes
XLOC_001041	XLOC_001041	ISCW001703	DS626687:12069-26852	ISG	IL	OK	2.86511	0.254999	-3.49003	2.19871	0.0278989	0.0875409	no
XLOC_001042	XLOC_001042	-	DS626687:27847-27929	ISG	IL	NOTEST	0	0	0	0	1	1	no
XLOC_001043	XLOC_001043	ISCW000403	DS626740:7345-45326	ISG	IL	NOTEST	0	0	0	0	1	1	no
XLOC_001044	XLOC_001044	ISCW000405	DS626740:71461-119484	ISG	IL	OK	119.558	37.5569	-1.67056	1.62444	0.104282	0.217496	no
XLOC_001045	XLOC_001045	ISCW000410	DS626740:205910-214964	ISG	IL	NOTEST	0.359413	1.21556	1.7579	-0.994888	0.319791	1	no
XLOC_001046	XLOC_001046	-	DS626740:153336-153410	ISG	IL	NOTEST	0	0	0	0	1	1	no
XLOC_001047	XLOC_001047	-	DS626740:153501-153575	ISG	IL	NOTEST	0	0	0	0	1	1	no
XLOC_001048	XLOC_001048	ISCW000408	DS626740:171706-173181	ISG	IL	OK	182.468	128.308	-0.508036	0.495067	0.620553	0.748056	no
XLOC_001049	XLOC_001049	ISCW000409	DS626740:199074-201387	ISG	IL	OK	14.0149	0.961975	-3.86482	3.93632	8.27401e-05	0.00178039	yes
XLOC_001050	XLOC_001050	ISCW024058	DS626766:1388-4459	ISG	IL	NOTEST	0	0	0	0	1	1	no
XLOC_001051	XLOC_001051	ISCW000744	DS626769:35521-35755	ISG	IL	NOTEST	0	0	0	0	1	1	no
XLOC_001052	XLOC_001052	ISCW001074	DS626779:32487-50712	ISG	IL	NOTEST	0	0.733759	1.79769e+308	1.79769e+308	0.158655	1	no
XLOC_001053	XLOC_001053	ISCW016176	DS626813:74642-85009	ISG	IL	OK	41.78	26.9109	-0.634626	0.675581	0.499307	0.648166	no
XLOC_001054	XLOC_001054	ISCW016178	DS626813:127190-136879	ISG	IL	OK	169.325	214.751	0.342864	-0.331128	0.740548	0.834727	no
XLOC_001055	XLOC_001055	-	DS626813:143457-159380	ISG	IL	NOTEST	0	0	0	0	1	1	no
XLOC_001056	XLOC_001056	ISCW016181	DS626813:161003-177984	ISG	IL	OK	11.4015	1.92802	-2.56403	2.10921	0.0349268	0.100144	no
XLOC_001057	XLOC_001057	ISCW016183	DS626813:191721-194624	ISG	IL	OK	22.0385	56.4341	1.35654	-1.33862	0.180695	0.314332	no
XLOC_001058	XLOC_001058	-	DS626813:223885-223958	ISG	IL	NOTEST	0	0	0	0	1	1	no
XLOC_001059	XLOC_001059	ISCW016189	DS626813:390275-410001	ISG	IL	NOTEST	0	0	0	0	1	1	no
XLOC_001060	XLOC_001060	-	DS626813:581716-581798	ISG	IL	NOTEST	0	0	0	0	1	1	no
XLOC_001061	XLOC_001061	-	DS626813:733543-733616	ISG	IL	NOTEST	0	0	0	0	1	1	no
XLOC_001062	XLOC_001062	ISCW016177	DS626813:123197-123764	ISG	IL	OK	10.9198	4.61642	-1.2421	1.29368	0.195775	0.334177	no
XLOC_001063	XLOC_001063	ISCW016179	DS626813:143457-159380	ISG	IL	OK	49.9961	26.7487	-0.90235	0.879596	0.379078	0.535072	no
XLOC_001064	XLOC_001064	ISCW016182	DS626813:179138-191379	ISG	IL	OK	2.88753	4.30843	0.577329	-0.608626	0.542772	0.686625	no
XLOC_001065	XLOC_001065	ISCW016184	DS626813:194690-215419	ISG	IL	OK	1.49808	0.591104	-1.34163	1.38218	0.166915	0.295287	no
XLOC_001066	XLOC_001066	ISCW016186	DS626813:227533-239863	ISG	IL	OK	68.024	25.9618	-1.38966	1.42869	0.153093	0.285968	no
XLOC_001067	XLOC_001067	ISCW016187	DS626813:244764-265013	ISG	IL	OK	11.0839	20.014	0.852538	-0.878056	0.379913	0.535746	no
XLOC_001068	XLOC_001068	ISCW016188	DS626813:307974-315250	ISG	IL	OK	47.5249	5.35773	-3.14899	2.59447	0.00947376	0.0526682	no
XLOC_001069	XLOC_001069	-	DS626813:390275-410001	ISG	IL	NOTEST	0	0	0	0	1	1	no
XLOC_001070	XLOC_001070	ISCW016191	DS626813:464217-464463	ISG	IL	OK	12.5209	0	-1.79769e+308	-1.79769e+308	0.0288898	0.0878738	no
XLOC_001071	XLOC_001071	ISCW016192	DS626813:484475-515101	ISG	IL	OK	14.1647	1.8682	-2.92258	3.00991	0.00261326	0.0210622	yes
XLOC_001072	XLOC_001072	ISCW016193	DS626813:540768-565952	ISG	IL	OK	6.52204	0.405476	-4.00763	3.89499	9.82021e-05	0.00202314	yes
XLOC_001073	XLOC_001073	ISCW016195	DS626813:612750-632990	ISG	IL	OK	6.54048	0	-1.79769e+308	-1.79769e+308	0.0140929	0.066059	no
XLOC_001074	XLOC_001074	ISCW016196	DS626813:659424-678685	ISG	IL	OK	16.2159	5.72536	-1.50197	1.58663	0.112597	0.230356	no
XLOC_001075	XLOC_001075	ISCW016197	DS626813:687416-716711	ISG	IL	OK	14.9505	4.56772	-1.71065	1.77327	0.0761841	0.175622	no
XLOC_001076	XLOC_001076	ISCW000309	DS626816:34605-34968	ISG	IL	NOTEST	0	0	0	0	1	1	no
XLOC_001077	XLOC_001077	ISCW000310	DS626816:44145-44754	ISG	IL	NOTEST	0.639864	0	-1.79769e+308	-1.79769e+308	0.158655	1	no
XLOC_001078	XLOC_001078	ISCW000587	DS626857:8063-12901	ISG	IL	OK	1.33364	0	-1.79769e+308	-1.79769e+308	0.0416323	0.11081	no
XLOC_001079	XLOC_001079	ISCW000588	DS626857:25126-25603	ISG	IL	NOTEST	0	0	0	0	1	1	no
XLOC_001080	XLOC_001080	ISCW024007	DS626898:4705-6740	ISG	IL	NOTEST	0	0	0	0	1	1	no
XLOC_001081	XLOC_001081	ISCW015904	DS626907:75328-84592	ISG	IL	OK	4.79433	123.348	4.68526	-4.8126	1.48982e-06	8.09797e-05	yes
XLOC_001082	XLOC_001082	ISCW015905	DS626907:85574-95786	ISG	IL	OK	2.97145	0.358915	-3.04945	1.91415	0.0556006	0.138936	no
XLOC_001083	XLOC_001083	ISCW015906	DS626907:120202-123607	ISG	IL	NOTEST	0	0.874994	1.79769e+308	1.79769e+308	0.0293909	1	no
XLOC_001084	XLOC_001084	ISCW015902	DS626907:11287-29741	ISG	IL	NOTEST	0.558354	0	-1.79769e+308	-1.79769e+308	0.0416323	1	no
XLOC_001085	XLOC_001085	ISCW000691	DS626929:6974-17942	ISG	IL	OK	14.5883	13.7052	-0.090096	0.0945695	0.924657	0.954707	no
XLOC_001086	XLOC_001086	ISCW000692	DS626929:23681-48171	ISG	IL	OK	18.3072	7.73952	-1.2421	1.30447	0.192073	0.329845	no
XLOC_001087	XLOC_001087	ISCW000693	DS626929:48305-48824	ISG	IL	OK	148.82	142.705	-0.0605288	0.060158	0.95203	0.971426	no
XLOC_001088	XLOC_001088	-	DS626929:89305-98960	ISG	IL	NOTEST	0	0	0	0	1	1	no
XLOC_001089	XLOC_001089	ISCW000699	DS626929:147612-150049	ISG	IL	OK	5.94697	1.25706	-2.2421	1.83812	0.0660442	0.157706	no
XLOC_001090	XLOC_001090	ISCW000694	DS626929:49205-50284	ISG	IL	OK	40.7455	17.1281	-1.25027	1.30327	0.192483	0.330378	no
XLOC_001091	XLOC_001091	ISCW000695	DS626929:75884-78213	ISG	IL	OK	70.2852	56.0885	-0.325515	0.344593	0.7304	0.828254	no
XLOC_001092	XLOC_001092	ISCW000696	DS626929:89305-98960	ISG	IL	OK	36.5364	35.5259	-0.0404653	0.0413493	0.967017	0.980092	no
XLOC_001093	XLOC_001093	ISCW000698	DS626929:99687-125668	ISG	IL	OK	5.98082	2.74404	-1.12404	1.18023	0.237907	0.386112	no
XLOC_001094	XLOC_001094	ISCW000880	DS626947:2829-5949	ISG	IL	NOTEST	0.169855	0	-1.79769e+308	-1.79769e+308	0.158655	1	no
XLOC_001095	XLOC_001095	ISCW001509	DS627001:11780-12004	ISG	IL	NOTEST	0	0	0	0	1	1	no
XLOC_001096	XLOC_001096	ISCW001801	DS627038:8162-12957	ISG	IL	OK	59.9909	191.621	1.67544	-1.73293	0.0831073	0.183476	no
XLOC_001097	XLOC_001097	ISCW001410	DS627105:28023-30773	ISG	IL	OK	0.299771	4.27263	3.83319	-3.93072	8.46914e-05	0.00180544	yes
XLOC_001098	XLOC_001098	ISCW001411	DS627105:222578-230029	ISG	IL	NOTEST	0	0	0	0	1	1	no
XLOC_001099	XLOC_001099	ISCW024059	DS627140:89-569	ISG	IL	OK	354.632	703.986	0.989226	-1.00035	0.31714	0.473974	no
XLOC_001100	XLOC_001100	ISCW000824	DS627160:5323-38308	ISG	IL	NOTEST	0	0	0	0	1	1	no
XLOC_001101	XLOC_001101	ISCW000826	DS627160:58137-59923	ISG	IL	OK	1.25531	11.3857	3.18111	-3.34261	0.000829945	0.00930907	yes
XLOC_001102	XLOC_001102	ISCW000827	DS627160:88539-88992	ISG	IL	NOTEST	0	0	0	0	1	1	no
XLOC_001103	XLOC_001103	-	DS627243:24432-24514	ISG	IL	NOTEST	0	0	0	0	1	1	no
XLOC_001104	XLOC_001104	-	DS627243:34708-34792	ISG	IL	NOTEST	0	0	0	0	1	1	no
XLOC_001105	XLOC_001105	ISCW015824	DS627243:44275-80982	ISG	IL	NOTEST	0.441444	0.223948	-0.979065	0.904178	0.365901	1	no
XLOC_001106	XLOC_001106	ISCW015827	DS627243:88809-90615	ISG	IL	OK	3.87566	0	-1.79769e+308	-1.79769e+308	0.0185281	0.070178	no
XLOC_001107	XLOC_001107	ISCW015820	DS627243:4905-5457	ISG	IL	NOTEST	0	1.07062	1.79769e+308	1.79769e+308	0.0786496	1	no
XLOC_001108	XLOC_001108	ISCW015821	DS627243:12757-24079	ISG	IL	OK	6.89314	5.82824	-0.242099	0.241117	0.809464	0.88383	no
XLOC_001109	XLOC_001109	ISCW015826	DS627243:84641-85058	ISG	IL	OK	0	7.93102	1.79769e+308	1.79769e+308	0.0194737	0.0705669	no
XLOC_001110	XLOC_001110	ISCW001455	DS627269:3785-4643	ISG	IL	OK	236.76	225.118	-0.0727447	0.0734079	0.941482	0.964869	no
XLOC_001111	XLOC_001111	ISCW024095	DS627310:4684-8438	ISG	IL	NOTEST	0	0	0	0	1	1	no
XLOC_001112	XLOC_001112	ISCW024096	DS627337:1093-1457	ISG	IL	OK	14.3936	0	-1.79769e+308	-1.79769e+308	0.0146642	0.066059	no
XLOC_001113	XLOC_001113	ISCW001778	DS627411:65090-65273	ISG	IL	NOTEST	0	0	0	0	1	1	no
XLOC_001114	XLOC_001114	-	DS627425:129693-129766	ISG	IL	NOTEST	0	0	0	0	1	1	no
XLOC_001115	XLOC_001115	ISCW001334	DS627425:21087-22374	ISG	IL	NOTEST	0.201793	1.36495	2.7579	-2.23072	0.0256996	1	no
XLOC_001116	XLOC_001116	ISCW001203	DS627460:10143-10332	ISG	IL	NOTEST	0	0	0	0	1	1	no
XLOC_001117	XLOC_001117	ISCW001805	DS627474:4626-7868	ISG	IL	NOTEST	0	0	0	0	1	1	no
XLOC_001118	XLOC_001118	ISCW001137	DS627486:1762-2032	ISG	IL	NOTEST	0	0	0	0	1	1	no
XLOC_001119	XLOC_001119	ISCW001024	DS627523:21268-23639	ISG	IL	NOTEST	0	0.976874	1.79769e+308	1.79769e+308	0.0786496	1	no
XLOC_001120	XLOC_001120	ISCW001025	DS627523:23791-31106	ISG	IL	NOTEST	0	0	0	0	1	1	no
XLOC_001121	XLOC_001121	ISCW001027	DS627523:169525-194107	ISG	IL	OK	11.5337	6.87547	-0.74633	0.780457	0.435122	0.590511	no
XLOC_001122	XLOC_001122	ISCW001349	DS627544:26312-33079	ISG	IL	NOTEST	0	0	0	0	1	1	no
XLOC_001123	XLOC_001123	ISCW001350	DS627544:59220-85929	ISG	IL	NOTEST	0.661996	0	-1.79769e+308	-1.79769e+308	0.0786496	1	no
XLOC_001124	XLOC_001124	ISCW001351	DS627544:132549-136202	ISG	IL	OK	32.4714	2.03371	-3.99699	2.52019	0.011729	0.0608688	no
XLOC_001125	XLOC_001125	ISCW001353	DS627544:205233-220147	ISG	IL	OK	7.52299	1.4539	-2.37138	2.45285	0.014173	0.066059	no
XLOC_001126	XLOC_001126	ISCW001354	DS627544:227104-227864	ISG	IL	OK	4.30206	0	-1.79769e+308	-1.79769e+308	0.0227501	0.0762482	no
XLOC_001127	XLOC_001127	ISCW001355	DS627544:239377-248563	ISG	IL	OK	10.7692	0.331111	-5.02346	4.09161	4.28382e-05	0.00106877	yes
XLOC_001128	XLOC_001128	ISCW001356	DS627544:250514-252951	ISG	IL	OK	13.4253	9.34808	-0.522207	0.534021	0.593327	0.728432	no
XLOC_001129	XLOC_001129	-	DS627544:154922-155003	ISG	IL	NOTEST	0	0	0	0	1	1	no
XLOC_001130	XLOC_001130	ISCW001050	DS627602:16016-17075	ISG	IL	NOTEST	0	0	0	0	1	1	no
XLOC_001131	XLOC_001131	ISCW001049	DS627602:7680-8394	ISG	IL	NOTEST	0.215184	0	-1.79769e+308	-1.79769e+308	0.158655	1	no
XLOC_001132	XLOC_001132	ISCW001011	DS627612:4900-4982	ISG	IL	NOTEST	0	0	0	0	1	1	no
XLOC_001133	XLOC_001133	ISCW001561	DS627632:4958-32025	ISG	IL	NOTEST	0	0	0	0	1	1	no
XLOC_001134	XLOC_001134	ISCW001513	DS627680:246364-246446	ISG	IL	NOTEST	0	0	0	0	1	1	no
XLOC_001135	XLOC_001135	ISCW000457	DS627689:2236-26956	ISG	IL	OK	7.8753	0	-1.79769e+308	-1.79769e+308	0.0148268	0.0663218	no
XLOC_001136	XLOC_001136	-	DS627689:90262-90334	ISG	IL	NOTEST	0	0	0	0	1	1	no
XLOC_001137	XLOC_001137	ISCW001412	DS627704:6150-6232	ISG	IL	NOTEST	0	0	0	0	1	1	no
XLOC_001138	XLOC_001138	ISCW016478	DS627705:6624-10379	ISG	IL	NOTEST	0.245522	0.103796	-1.2421	1.00467	0.315057	1	no
XLOC_001139	XLOC_001139	ISCW016479	DS627705:22557-37902	ISG	IL	OK	4.3442	1.76308	-1.30099	1.37103	0.170367	0.30042	no
XLOC_001140	XLOC_001140	ISCW000002	DS627713:0-7860	ISG	IL	OK	75.3499	136.719	0.859541	-0.879611	0.37907	0.535072	no
XLOC_001141	XLOC_001141	ISCW000003	DS627713:12650-27045	ISG	IL	OK	2.24936	1.33131	-0.756672	0.777636	0.436784	0.591926	no
XLOC_001142	XLOC_001142	ISCW000468	DS627765:841-1423	ISG	IL	NOTEST	0	0	0	0	1	1	no
XLOC_001143	XLOC_001143	ISCW001760	DS627767:134-365	ISG	IL	OK	5.17274	4.37362	-0.242099	0.137017	0.891018	0.93453	no
XLOC_001144	XLOC_001144	ISCW000190	DS627930:260479-264242	ISG	IL	NOTEST	0	0	0	0	1	1	no
XLOC_001145	XLOC_001145	ISCW000161	DS627939:3345-54308	ISG	IL	OK	51.5349	25.6687	-1.00554	1.03016	0.302936	0.459695	no
XLOC_001146	XLOC_001146	ISCW000532	DS627957:21795-22117	ISG	IL	NOTEST	0	0	0	0	1	1	no
XLOC_001147	XLOC_001147	ISCW001161	DS628063:2689-3781	ISG	IL	OK	0.123157	16.8692	7.09775	-4.45874	8.24426e-06	0.000318362	yes
XLOC_001148	XLOC_001148	ISCW001181	DS628117:160-233	ISG	IL	NOTEST	0	0	0	0	1	1	no
XLOC_001149	XLOC_001149	ISCW001184	DS628117:46075-55051	ISG	IL	NOTEST	0	0	0	0	1	1	no
XLOC_001150	XLOC_001150	ISCW001182	DS628117:11204-11608	ISG	IL	OK	0	5.03441	1.79769e+308	1.79769e+308	0.158655	0.285968	no
XLOC_001151	XLOC_001151	ISCW001183	DS628117:36113-39405	ISG	IL	NOTEST	0	0	0	0	1	1	no
XLOC_001152	XLOC_001152	ISCW001185	DS628117:97444-103838	ISG	IL	NOTEST	0	0	0	0	1	1	no
XLOC_001153	XLOC_001153	ISCW001075	DS628162:26243-50127	ISG	IL	NOTEST	0.196149	0.110565	-0.827062	0.496471	0.619562	1	no
XLOC_001154	XLOC_001154	ISCW000187	DS628167:10555-11619	ISG	IL	NOTEST	0	0	0	0	1	1	no
XLOC_001155	XLOC_001155	ISCW001742	DS628269:236-9371	ISG	IL	OK	412.452	407.4	-0.0177818	0.0181136	0.985548	0.990124	no
XLOC_001156	XLOC_001156	ISCW024082	DS628315:161-776	ISG	IL	OK	338.149	295.921	-0.192447	0.19513	0.845291	0.907957	no
XLOC_001157	XLOC_001157	ISCW000070	DS628361:42172-42517	ISG	IL	NOTEST	0	0	0	0	1	1	no
XLOC_001158	XLOC_001158	ISCW001454	DS628417:782-10459	ISG	IL	NOTEST	0	0	0	0	1	1	no
XLOC_001159	XLOC_001159	ISCW000351	DS628442:26618-26691	ISG	IL	NOTEST	0	0	0	0	1	1	no
XLOC_001160	XLOC_001160	ISCW016465	DS628492:350236-403569	ISG	IL	OK	0.21305	7.74587	5.18417	-4.26667	1.98416e-05	0.000623965	yes
XLOC_001161	XLOC_001161	ISCW016463	DS628492:3092-11872	ISG	IL	NOTEST	0	0	0	0	1	1	no
XLOC_001162	XLOC_001162	ISCW016464	DS628492:138108-138327	ISG	IL	NOTEST	0	0	0	0	1	1	no
XLOC_001163	XLOC_001163	ISCW016466	DS628492:423694-427474	ISG	IL	OK	3.03241	0.466171	-2.70153	1.69316	0.0904256	0.19411	no
XLOC_001164	XLOC_001164	ISCW000565	DS628501:61651-64733	ISG	IL	NOTEST	0	0	0	0	1	1	no
XLOC_001165	XLOC_001165	ISCW016459	DS628571:163365-163575	ISG	IL	NOTEST	0	0	0	0	1	1	no
XLOC_001166	XLOC_001166	ISCW001404	DS628726:1841-20208	ISG	IL	NOTEST	0	0	0	0	1	1	no
XLOC_001167	XLOC_001167	ISCW001405	DS628726:60389-60800	ISG	IL	NOTEST	0	0	0	0	1	1	no
XLOC_001168	XLOC_001168	ISCW001069	DS628737:6415-6618	ISG	IL	NOTEST	0	0	0	0	1	1	no
XLOC_001169	XLOC_001169	ISCW015758	DS628768:34961-45097	ISG	IL	OK	23.4801	1.60103	-3.87437	3.77238	0.000161696	0.00283562	yes
XLOC_001170	XLOC_001170	ISCW015759	DS628768:138415-139873	ISG	IL	NOTEST	0.261278	0.294552	0.172938	-0.131313	0.895528	1	no
XLOC_001171	XLOC_001171	ISCW015760	DS628768:141497-142425	ISG	IL	OK	1.20971	0.255708	-2.2421	1.3988	0.161872	0.288278	no
XLOC_001172	XLOC_001172	ISCW015761	DS628768:142458-142638	ISG	IL	OK	19.997	0	-1.79769e+308	-1.79769e+308	0.0416323	0.11081	no
XLOC_001173	XLOC_001173	ISCW015762	DS628768:194544-194962	ISG	IL	OK	80.3891	62.2694	-0.368476	0.382581	0.702031	0.808474	no
XLOC_001174	XLOC_001174	ISCW015763	DS628768:202610-203666	ISG	IL	NOTEST	0	0	0	0	1	1	no
XLOC_001175	XLOC_001175	ISCW001274	DS628807:8887-35466	ISG	IL	OK	171.57	29.696	-2.53046	2.50641	0.0121963	0.0625842	no
XLOC_001176	XLOC_001176	ISCW001295	DS628874:677-889	ISG	IL	NOTEST	0	0	0	0	1	1	no
XLOC_001177	XLOC_001177	-	DS628877:53888-53961	ISG	IL	NOTEST	0	0	0	0	1	1	no
XLOC_001178	XLOC_001178	ISCW001312	DS628877:274188-298801	ISG	IL	NOTEST	0	0	0	0	1	1	no
XLOC_001179	XLOC_001179	ISCW001315	DS628877:399082-439380	ISG	IL	OK	9.34868	1.25677	-2.89504	2.9967	0.00272918	0.021767	yes
XLOC_001180	XLOC_001180	ISCW001318	DS628877:472823-473513	ISG	IL	NOTEST	0.677703	0.382005	-0.827062	0.496471	0.619562	1	no
XLOC_001181	XLOC_001181	ISCW001319	DS628877:474456-475059	ISG	IL	NOTEST	0.82702	0.466171	-0.827062	0.496471	0.619562	1	no
XLOC_001182	XLOC_001182	ISCW001306	DS628877:729-19174	ISG	IL	OK	38.9139	2.65341	-3.87437	3.77238	0.000161696	0.00283562	yes
XLOC_001183	XLOC_001183	ISCW001307	DS628877:23171-41044	ISG	IL	OK	46.6915	2.3519	-4.31126	4.30207	1.69208e-05	0.000557659	yes
XLOC_001184	XLOC_001184	ISCW001309	DS628877:181810-204825	ISG	IL	OK	24.2375	13.7688	-0.815834	0.85565	0.392192	0.548342	no
XLOC_001185	XLOC_001185	ISCW001310	DS628877:234177-251572	ISG	IL	OK	3.99144	9.5289	1.2554	-1.33418	0.182144	0.316475	no
XLOC_001186	XLOC_001186	ISCW001311	DS628877:274188-298801	ISG	IL	NOTEST	0	0.758848	1.79769e+308	1.79769e+308	0.0169474	1	no
XLOC_001187	XLOC_001187	ISCW001313	DS628877:302268-302496	ISG	IL	OK	2.70771	0	-1.79769e+308	-1.79769e+308	0.158655	0.285968	no
XLOC_001188	XLOC_001188	ISCW001314	DS628877:378736-378937	ISG	IL	OK	4.30454	0	-1.79769e+308	-1.79769e+308	0.158655	0.285968	no
XLOC_001189	XLOC_001189	ISCW001316	DS628877:452850-461238	ISG	IL	OK	32.3921	6.74166	-2.26447	2.35933	0.0183081	0.070178	no
XLOC_001190	XLOC_001190	ISCW001317	DS628877:461331-463907	ISG	IL	OK	44.8965	18.3258	-1.29273	1.33134	0.183076	0.317654	no
XLOC_001191	XLOC_001191	ISCW024040	DS628943:4383-5436	ISG	IL	NOTEST	0	0	0	0	1	1	no
XLOC_001192	XLOC_001192	ISCW000929	DS628990:223396-284925	ISG	IL	OK	2.27525	0.0818525	-4.79685	3.02322	0.00250097	0.0203864	yes
XLOC_001193	XLOC_001193	ISCW000930	DS628990:309833-312141	ISG	IL	NOTEST	0	0	0	0	1	1	no
XLOC_001194	XLOC_001194	ISCW000931	DS628990:312255-316372	ISG	IL	NOTEST	0	0	0	0	1	1	no
XLOC_001195	XLOC_001195	-	DS628990:328850-401085	ISG	IL	NOTEST	0	0	0	0	1	1	no
XLOC_001196	XLOC_001196	ISCW000928	DS628990:191709-191791	ISG	IL	NOTEST	0	0	0	0	1	1	no
XLOC_001197	XLOC_001197	ISCW000932	DS628990:328850-401085	ISG	IL	NOTEST	0	0	0	0	1	1	no
XLOC_001198	XLOC_001198	ISCW024077	DS628995:698-1091	ISG	IL	NOTEST	0	0	0	0	1	1	no
XLOC_001199	XLOC_001199	ISCW016477	DS629033:70073-71714	ISG	IL	NOTEST	0	0	0	0	1	1	no
XLOC_001200	XLOC_001200	ISCW015900	DS629072:165944-215539	ISG	IL	OK	3.51875	1.48758	-1.2421	1.31604	0.188159	0.324782	no
XLOC_001201	XLOC_001201	ISCW015901	DS629072:217858-222206	ISG	IL	OK	117.519	112.865	-0.0583019	0.0582565	0.953544	0.9719	no
XLOC_001202	XLOC_001202	ISCW000470	DS629139:23856-24071	ISG	IL	NOTEST	0	0	0	0	1	1	no
XLOC_001203	XLOC_001203	ISCW001010	DS629182:106259-168260	ISG	IL	OK	4.57559	3.18601	-0.522207	0.553929	0.579627	0.717125	no
XLOC_001204	XLOC_001204	ISCW001009	DS629182:84938-85010	ISG	IL	NOTEST	0	0	0	0	1	1	no
XLOC_001205	XLOC_001205	ISCW000828	DS629199:105428-125674	ISG	IL	NOTEST	0	0	0	0	1	1	no
XLOC_001206	XLOC_001206	ISCW000831	DS629199:189535-224893	ISG	IL	NOTEST	0.0611242	0.103363	0.757901	-0.371469	0.710288	1	no
XLOC_001207	XLOC_001207	ISCW000832	DS629199:280114-292588	ISG	IL	OK	1.10507	0	-1.79769e+308	-1.79769e+308	0.158655	0.285968	no
XLOC_001208	XLOC_001208	ISCW000469	DS629204:13803-14642	ISG	IL	NOTEST	0	0	0	0	1	1	no
XLOC_001209	XLOC_001209	ISCW001690	DS629248:10552-10811	ISG	IL	NOTEST	0	0	0	0	1	1	no
XLOC_001210	XLOC_001210	ISCW000411	DS629251:27907-53575	ISG	IL	OK	1.11467	1.09955	-0.0197067	0.019986	0.984055	0.989877	no
XLOC_001211	XLOC_001211	ISCW000412	DS629251:59016-65354	ISG	IL	OK	70.6983	78.4566	0.150218	-0.147125	0.883033	0.931202	no
XLOC_001212	XLOC_001212	ISCW000413	DS629251:68214-93535	ISG	IL	OK	36.7839	193.743	2.397	-2.21419	0.0268159	0.0851679	no
XLOC_001213	XLOC_001213	ISCW000414	DS629251:121667-132546	ISG	IL	OK	1.87011	0.702757	-1.41202	1.14196	0.25347	0.403981	no
XLOC_001214	XLOC_001214	ISCW000225	DS629255:4548-11062	ISG	IL	OK	4.3431	2.4481	-0.827062	0.496471	0.619562	0.747603	no
XLOC_001215	XLOC_001215	ISCW000226	DS629255:11646-17381	ISG	IL	OK	3.36162	3.78973	0.172938	-0.18171	0.85581	0.913491	no
XLOC_001216	XLOC_001216	ISCW000227	DS629255:30276-33470	ISG	IL	OK	26.9806	2.74849	-3.29521	3.23654	0.00120987	0.0124003	yes
XLOC_001217	XLOC_001217	ISCW000228	DS629255:44623-44869	ISG	IL	OK	2.08682	0	-1.79769e+308	-1.79769e+308	0.158655	0.285968	no
XLOC_001218	XLOC_001218	ISCW000229	DS629255:87105-106751	ISG	IL	NOTEST	0.538552	0.260202	-1.04945	0.842831	0.399323	1	no
XLOC_001219	XLOC_001219	ISCW000144	DS629286:34744-49532	ISG	IL	NOTEST	0	0	0	0	1	1	no
XLOC_001220	XLOC_001220	ISCW000436	DS629320:18724-43854	ISG	IL	OK	41.1757	5.84756	-2.81589	2.85245	0.00433843	0.0299203	yes
XLOC_001221	XLOC_001221	ISCW000440	DS629320:163483-169971	ISG	IL	OK	41.5033	33.5659	-0.306229	0.328111	0.742828	0.836557	no
XLOC_001222	XLOC_001222	ISCW000441	DS629320:175112-190658	ISG	IL	OK	4.75869	2.55151	-0.899211	0.953011	0.340585	0.495455	no
XLOC_001223	XLOC_001223	ISCW000437	DS629320:50687-60403	ISG	IL	OK	19.303	81.5115	2.07818	-2.07539	0.0379507	0.106524	no
XLOC_001224	XLOC_001224	ISCW000438	DS629320:143578-143950	ISG	IL	OK	21.8768	14.5735	-0.586054	0.622044	0.533913	0.678724	no
XLOC_001225	XLOC_001225	ISCW000439	DS629320:144448-162702	ISG	IL	OK	9.75169	34.3977	1.81859	-1.94578	0.0516807	0.131232	no
XLOC_001226	XLOC_001226	ISCW000442	DS629320:199459-203930	ISG	IL	OK	3.80521	93.3034	4.61588	-3.80222	0.000143405	0.00262315	yes
XLOC_001227	XLOC_001227	ISCW000443	DS629320:204160-204485	ISG	IL	OK	0	8.69693	1.79769e+308	1.79769e+308	0.158655	0.285968	no
XLOC_001228	XLOC_001228	ISCW000579	DS629339:117658-129013	ISG	IL	NOTEST	0	0	0	0	1	1	no
XLOC_001229	XLOC_001229	ISCW000580	DS629339:173414-173648	ISG	IL	NOTEST	0	0	0	0	1	1	no
XLOC_001230	XLOC_001230	ISCW000581	DS629339:179175-194485	ISG	IL	NOTEST	0.108435	0.366733	1.7579	-0.994888	0.319791	1	no
XLOC_001231	XLOC_001231	ISCW001511	DS629340:2448-2523	ISG	IL	NOTEST	0	0	0	0	1	1	no
XLOC_001232	XLOC_001232	ISCW001512	DS629340:2842-7264	ISG	IL	NOTEST	0	0	0	0	1	1	no
XLOC_001233	XLOC_001233	ISCW001698	DS629409:20548-46321	ISG	IL	NOTEST	0	0.554667	1.79769e+308	1.79769e+308	0.158655	1	no
XLOC_001234	XLOC_001234	ISCW001700	DS629409:61255-102740	ISG	IL	NOTEST	0	1.51202	1.79769e+308	1.79769e+308	0.0154857	1	no
XLOC_001235	XLOC_001235	ISCW001701	DS629409:106655-116801	ISG	IL	NOTEST	0	0.364602	1.79769e+308	1.79769e+308	0.158655	1	no
XLOC_001236	XLOC_001236	ISCW001697	DS629409:21-16449	ISG	IL	NOTEST	0	0	0	0	1	1	no
XLOC_001237	XLOC_001237	-	DS629409:20548-46321	ISG	IL	NOTEST	0	0	0	0	1	1	no
XLOC_001238	XLOC_001238	ISCW000834	DS629490:73454-125899	ISG	IL	OK	1.27703	0.487629	-1.38894	1.46489	0.142952	0.276013	no
XLOC_001239	XLOC_001239	ISCW000833	DS629490:41991-45753	ISG	IL	NOTEST	0.229231	0	-1.79769e+308	-1.79769e+308	0.158655	1	no
XLOC_001240	XLOC_001240	ISCW000835	DS629490:127762-152362	ISG	IL	OK	18.5908	9.98114	-0.897314	0.893203	0.371748	0.527541	no
XLOC_001241	XLOC_001241	ISCW001628	DS629619:9860-11747	ISG	IL	NOTEST	0	0	0	0	1	1	no
XLOC_001242	XLOC_001242	ISCW015964	DS629642:132249-161591	ISG	IL	OK	5.53533	0.725601	-2.93142	3.00365	0.00266762	0.02141	yes
XLOC_001243	XLOC_001243	ISCW015965	DS629642:180940-186225	ISG	IL	OK	8.05818	1.58449	-2.34644	2.32512	0.0200655	0.072006	no
XLOC_001244	XLOC_001244	ISCW015966	DS629642:186862-188760	ISG	IL	OK	1.61039	9.25896	2.52344	-2.67815	0.00740307	0.0438337	yes
XLOC_001245	XLOC_001245	ISCW015967	DS629642:192177-197739	ISG	IL	OK	56.6786	31.594	-0.843156	0.8328	0.404958	0.561179	no
XLOC_001246	XLOC_001246	ISCW015968	DS629642:199464-203016	ISG	IL	OK	72.0482	18.417	-1.96792	2.05382	0.0399927	0.11081	no
XLOC_001247	XLOC_001247	ISCW015970	DS629642:223505-224641	ISG	IL	OK	26.5254	29.3006	0.143555	-0.149284	0.881329	0.929823	no
XLOC_001248	XLOC_001248	ISCW015971	DS629642:227182-235202	ISG	IL	OK	54.1924	12.7356	-2.08922	2.15069	0.0315007	0.0927553	no
XLOC_001249	XLOC_001249	ISCW015975	DS629642:257868-323332	ISG	IL	OK	6.9854	4.48693	-0.638617	0.634294	0.525889	0.670398	no
XLOC_001250	XLOC_001250	ISCW015969	DS629642:210727-222465	ISG	IL	OK	56.4951	1.96304	-4.84696	4.8606	1.17033e-06	6.7406e-05	yes
XLOC_001251	XLOC_001251	-	DS629642:227182-235202	ISG	IL	NOTEST	0	0	0	0	1	1	no
XLOC_001252	XLOC_001252	ISCW015973	DS629642:238714-244180	ISG	IL	OK	2.43121	7.40025	1.6059	-1.55175	0.120722	0.242267	no
XLOC_001253	XLOC_001253	ISCW015974	DS629642:248528-257147	ISG	IL	OK	22.9455	12.4458	-0.882557	0.931813	0.351433	0.506992	no
XLOC_001254	XLOC_001254	-	DS629642:257868-323332	ISG	IL	NOTEST	0	0	0	0	1	1	no
XLOC_001255	XLOC_001255	ISCW001211	DS629750:56238-58561	ISG	IL	NOTEST	0	0	0	0	1	1	no
XLOC_001256	XLOC_001256	ISCW001209	DS629750:8412-28893	ISG	IL	OK	22.1702	25.6631	0.211074	-0.216346	0.828718	0.897335	no
XLOC_001257	XLOC_001257	ISCW000076	DS629804:3734-4818	ISG	IL	OK	0	10.9288	1.79769e+308	1.79769e+308	0.0289604	0.0878738	no
XLOC_001258	XLOC_001258	ISCW000077	DS629804:35355-36607	ISG	IL	NOTEST	0	0	0	0	1	1	no
XLOC_001259	XLOC_001259	ISCW000078	DS629804:42991-52598	ISG	IL	OK	8.06039	254.907	4.98298	-4.9493	7.44816e-07	4.77223e-05	yes
XLOC_001260	XLOC_001260	ISCW000080	DS629804:63159-71156	ISG	IL	OK	6.30835	253.614	5.32923	-5.31361	1.07474e-07	1.03582e-05	yes
XLOC_001261	XLOC_001261	-	DS629804:61363-61445	ISG	IL	NOTEST	0	0	0	0	1	1	no
XLOC_001262	XLOC_001262	-	DS629804:79558-79631	ISG	IL	NOTEST	0	0	0	0	1	1	no
XLOC_001263	XLOC_001263	ISCW000383	DS629853:8789-10870	ISG	IL	OK	2.21227	1.8705	-0.242099	0.246278	0.805467	0.88114	no
XLOC_001264	XLOC_001264	ISCW024088	DS629860:6033-6501	ISG	IL	NOTEST	0.418885	0	-1.79769e+308	-1.79769e+308	0.158655	1	no
XLOC_001265	XLOC_001265	ISCW001613	DS629889:4655-6422	ISG	IL	NOTEST	0	0	0	0	1	1	no
XLOC_001266	XLOC_001266	ISCW001806	DS629977:45028-45463	ISG	IL	NOTEST	0	0	0	0	1	1	no
XLOC_001267	XLOC_001267	ISCW001807	DS629977:45512-46175	ISG	IL	NOTEST	0.71793	0	-1.79769e+308	-1.79769e+308	0.0416323	1	no
XLOC_001268	XLOC_001268	ISCW000311	DS630050:16070-33683	ISG	IL	OK	23.1544	0	-1.79769e+308	-1.79769e+308	0.014722	0.066059	no
XLOC_001269	XLOC_001269	ISCW024071	DS630082:504-1439	ISG	IL	NOTEST	0	0	0	0	1	1	no
XLOC_001270	XLOC_001270	ISCW000558	DS630128:26722-28795	ISG	IL	NOTEST	0.058371	0	-1.79769e+308	-1.79769e+308	0.158655	1	no
XLOC_001271	XLOC_001271	ISCW024070	DS630315:15-735	ISG	IL	OK	1.27597	1.07885	-0.242099	0.214664	0.83003	0.897484	no
XLOC_001272	XLOC_001272	ISCW016533	DS630327:7186-54273	ISG	IL	OK	20.1169	29.9656	0.574896	-0.575998	0.564617	0.704558	no
XLOC_001273	XLOC_001273	ISCW016535	DS630327:66424-85745	ISG	IL	OK	151.36	512.411	1.75932	-1.59684	0.110301	0.22671	no
XLOC_001274	XLOC_001274	-	DS630327:7186-54273	ISG	IL	NOTEST	0	0	0	0	1	1	no
XLOC_001275	XLOC_001275	ISCW016536	DS630327:85928-123326	ISG	IL	OK	52.9613	228.234	2.10751	-1.9523	0.0509027	0.129792	no
XLOC_001276	XLOC_001276	ISCW000739	DS630345:34436-34518	ISG	IL	NOTEST	0	0	0	0	1	1	no
XLOC_001277	XLOC_001277	ISCW000740	DS630345:42321-44656	ISG	IL	OK	29.5636	6.24911	-2.2421	2.29638	0.0216541	0.0754501	no
XLOC_001278	XLOC_001278	ISCW000539	DS630348:19520-22258	ISG	IL	NOTEST	0	0	0	0	1	1	no
XLOC_001279	XLOC_001279	ISCW000541	DS630348:33519-41638	ISG	IL	OK	1.33868	0.905497	-0.564027	0.590729	0.554702	0.696276	no
XLOC_001280	XLOC_001280	ISCW000542	DS630348:45682-71036	ISG	IL	OK	14.8502	5.30256	-1.48572	1.53609	0.124516	0.248318	no
XLOC_001281	XLOC_001281	ISCW000543	DS630348:71105-71495	ISG	IL	OK	11.3636	73.8305	2.6998	-2.86732	0.00413959	0.029105	yes
XLOC_001282	XLOC_001282	ISCW000544	DS630348:74989-79485	ISG	IL	OK	4.7778	2.45267	-0.961991	1.02169	0.306929	0.464203	no
XLOC_001283	XLOC_001283	ISCW000545	DS630348:80852-81560	ISG	IL	OK	58.1436	53.3961	-0.122886	0.124307	0.901072	0.939661	no
XLOC_001284	XLOC_001284	ISCW000547	DS630348:336242-340921	ISG	IL	NOTEST	0.261753	1.32789	2.34286	-1.40638	0.159611	1	no
XLOC_001285	XLOC_001285	ISCW000538	DS630348:7045-19031	ISG	IL	OK	212.563	23.0145	-3.20728	3.17873	0.00147923	0.0140557	yes
XLOC_001286	XLOC_001286	ISCW000540	DS630348:26691-32966	ISG	IL	OK	12.911	2.91105	-2.14899	2.22896	0.0258167	0.0835239	no
XLOC_001287	XLOC_001287	ISCW000546	DS630348:81735-81957	ISG	IL	OK	2.97713	0	-1.79769e+308	-1.79769e+308	0.158655	0.285968	no
XLOC_001288	XLOC_001288	ISCW015922	DS630389:108182-108449	ISG	IL	NOTEST	0	0	0	0	1	1	no
XLOC_001289	XLOC_001289	ISCW015924	DS630389:127963-177636	ISG	IL	OK	18.9113	3.49597	-2.43548	2.47184	0.0134419	0.066059	no
XLOC_001290	XLOC_001290	ISCW015921	DS630389:72815-73385	ISG	IL	OK	39.2469	44.843	0.192304	-0.200855	0.840812	0.905472	no
XLOC_001291	XLOC_001291	ISCW015923	DS630389:108678-127222	ISG	IL	OK	15.4005	1.51411	-3.34644	3.28442	0.00102191	0.0108723	yes
XLOC_001292	XLOC_001292	ISCW015925	DS630389:179431-180527	ISG	IL	OK	13.4862	103.04	2.93364	-2.94789	0.00319953	0.0242855	yes
XLOC_001293	XLOC_001293	ISCW000593	DS630446:3068-12083	ISG	IL	OK	0.717483	2.42657	1.7579	-1.75077	0.0799856	0.178093	no
XLOC_001294	XLOC_001294	ISCW000594	DS630446:120340-134278	ISG	IL	NOTEST	0.870284	1.73925	0.998909	-1.04137	0.297706	1	no
XLOC_001295	XLOC_001295	ISCW000595	DS630446:156210-190752	ISG	IL	NOTEST	0.0672409	0.454825	2.7579	-1.70981	0.0873001	1	no
XLOC_001296	XLOC_001296	ISCW000596	DS630446:212270-217807	ISG	IL	NOTEST	0	0	0	0	1	1	no
XLOC_001297	XLOC_001297	ISCW000597	DS630446:233837-238283	ISG	IL	NOTEST	0	0	0	0	1	1	no
XLOC_001298	XLOC_001298	ISCW000598	DS630446:242509-280339	ISG	IL	NOTEST	0.205144	0	-1.79769e+308	-1.79769e+308	0.0416323	1	no
XLOC_001299	XLOC_001299	ISCW000599	DS630446:289468-331970	ISG	IL	OK	2.09816	1.8978	-0.144802	0.155033	0.876795	0.926817	no
XLOC_001300	XLOC_001300	ISCW000600	DS630446:343948-395202	ISG	IL	OK	6.89647	1.44572	-2.25407	2.34462	0.0190465	0.0705669	no
XLOC_001301	XLOC_001301	ISCW000601	DS630446:439733-439995	ISG	IL	NOTEST	0	0	0	0	1	1	no
XLOC_001302	XLOC_001302	ISCW000602	DS630446:453271-474399	ISG	IL	OK	4.86281	1.67819	-1.53488	1.60329	0.108871	0.224818	no
XLOC_001303	XLOC_001303	ISCW000603	DS630446:597403-599725	ISG	IL	OK	11.0235	0	-1.79769e+308	-1.79769e+308	0.0293909	0.0878738	no
XLOC_001304	XLOC_001304	ISCW000096	DS630482:13875-26137	ISG	IL	OK	10.9649	3.25298	-1.75306	1.82887	0.0674197	0.160422	no
XLOC_001305	XLOC_001305	ISCW000098	DS630482:35680-36993	ISG	IL	OK	6.69952	7.66379	0.194	-0.206529	0.836378	0.902222	no
XLOC_001306	XLOC_001306	ISCW000099	DS630482:37847-38108	ISG	IL	OK	25.8205	2.91088	-3.14899	1.97794	0.0479357	0.123406	no
XLOC_001307	XLOC_001307	ISCW000101	DS630482:170709-198084	ISG	IL	OK	5.1302	0.381332	-3.74989	3.79128	0.000149875	0.00269001	yes
XLOC_001308	XLOC_001308	ISCW000103	DS630482:214862-236101	ISG	IL	OK	1.47127	0.248795	-2.56403	1.60249	0.109047	0.224818	no
XLOC_001309	XLOC_001309	ISCW000105	DS630482:325545-326250	ISG	IL	NOTEST	0	0	0	0	1	1	no
XLOC_001310	XLOC_001310	ISCW000095	DS630482:1512-2154	ISG	IL	OK	26.8462	19.5163	-0.460036	0.484354	0.628135	0.75388	no
XLOC_001311	XLOC_001311	ISCW000097	DS630482:33471-34711	ISG	IL	OK	0.738447	3.03264	2.03801	-2.08411	0.0371498	0.104815	no
XLOC_001312	XLOC_001312	ISCW000100	DS630482:120173-120335	ISG	IL	NOTEST	0	0	0	0	1	1	no
XLOC_001313	XLOC_001313	ISCW000102	DS630482:205507-205726	ISG	IL	NOTEST	0	0	0	0	1	1	no
XLOC_001314	XLOC_001314	ISCW000104	DS630482:275667-281540	ISG	IL	NOTEST	0	0	0	0	1	1	no
XLOC_001315	XLOC_001315	ISCW000106	DS630482:400663-405908	ISG	IL	NOTEST	0	0	0	0	1	1	no
XLOC_001316	XLOC_001316	ISCW000107	DS630482:419284-419485	ISG	IL	NOTEST	0	0	0	0	1	1	no
XLOC_001317	XLOC_001317	ISCW000171	DS630485:154-227	ISG	IL	NOTEST	0	0	0	0	1	1	no
XLOC_001318	XLOC_001318	ISCW000172	DS630485:20786-22792	ISG	IL	NOTEST	1.04731	0	-1.79769e+308	-1.79769e+308	0.158655	1	no
XLOC_001319	XLOC_001319	ISCW000173	DS630485:33718-38499	ISG	IL	OK	3.25067	1.0994	-1.56403	1.26884	0.204497	0.343472	no
XLOC_001320	XLOC_001320	ISCW000174	DS630485:152721-156144	ISG	IL	OK	1.73408	2.34591	0.435973	-0.415094	0.678073	0.793391	no
XLOC_001321	XLOC_001321	ISCW000175	DS630485:249836-263138	ISG	IL	NOTEST	0	0	0	0	1	1	no
XLOC_001322	XLOC_001322	ISCW000177	DS630485:294193-310977	ISG	IL	OK	23.4256	15.4518	-0.600309	0.59715	0.550407	0.693305	no
XLOC_001323	XLOC_001323	ISCW000179	DS630485:314215-339601	ISG	IL	OK	56.4867	4.26031	-3.72888	3.75996	0.000169943	0.00293536	yes
XLOC_001324	XLOC_001324	ISCW000181	DS630485:359637-362091	ISG	IL	OK	94.223	24.1787	-1.96234	1.86982	0.0615095	0.150128	no
XLOC_001325	XLOC_001325	ISCW000183	DS630485:367283-369960	ISG	IL	OK	14.9908	6.18837	-1.27645	1.30158	0.193059	0.331218	no
XLOC_001326	XLOC_001326	ISCW000176	DS630485:287919-293950	ISG	IL	OK	13.0271	10.2279	-0.349014	0.366607	0.713912	0.81455	no
XLOC_001327	XLOC_001327	ISCW000178	DS630485:294193-310977	ISG	IL	OK	2.53503	0.680497	-1.89734	1.92032	0.0548177	0.137783	no
XLOC_001328	XLOC_001328	ISCW000180	DS630485:351572-359185	ISG	IL	OK	3.97762	2.19335	-0.85877	0.91029	0.36267	0.51883	no
XLOC_001329	XLOC_001329	ISCW000182	DS630485:364160-366416	ISG	IL	OK	12.0781	9.04705	-0.416874	0.433677	0.664523	0.783774	no
XLOC_001330	XLOC_001330	ISCW001637	DS630536:4130-4484	ISG	IL	NOTEST	0	0	0	0	1	1	no
XLOC_001331	XLOC_001331	ISCW000188	DS630601:36866-42447	ISG	IL	NOTEST	0	0	0	0	1	1	no
XLOC_001332	XLOC_001332	ISCW000949	DS630645:10345-10513	ISG	IL	NOTEST	0	0	0	0	1	1	no
XLOC_001333	XLOC_001333	ISCW001371	DS630745:13831-14088	ISG	IL	NOTEST	0	0	0	0	1	1	no
XLOC_001334	XLOC_001334	ISCW000836	DS630765:29973-30770	ISG	IL	NOTEST	0	0	0	0	1	1	no
XLOC_001335	XLOC_001335	-	DS630829:29153-29235	ISG	IL	NOTEST	0	0	0	0	1	1	no
XLOC_001336	XLOC_001336	-	DS630829:65026-65099	ISG	IL	NOTEST	0	0	0	0	1	1	no
XLOC_001337	XLOC_001337	ISCW001275	DS630829:9229-9610	ISG	IL	NOTEST	0	0	0	0	1	1	no
XLOC_001338	XLOC_001338	ISCW001278	DS630829:110402-116355	ISG	IL	NOTEST	0	0	0	0	1	1	no
XLOC_001339	XLOC_001339	ISCW015804	DS630877:43939-44407	ISG	IL	NOTEST	0	0	0	0	1	1	no
XLOC_001340	XLOC_001340	ISCW015803	DS630877:1276-6214	ISG	IL	OK	6.45314	47.7419	2.88718	-3.00832	0.00262694	0.0211427	yes
XLOC_001341	XLOC_001341	ISCW000751	DS630914:62078-78366	ISG	IL	OK	4.18835	1.63445	-1.35758	1.26624	0.205429	0.344156	no
XLOC_001342	XLOC_001342	ISCW000752	DS630914:79586-80639	ISG	IL	OK	1.67494	1.743	0.0574612	-0.0591565	0.952827	0.971635	no
XLOC_001343	XLOC_001343	ISCW000754	DS630914:122565-129789	ISG	IL	OK	12.8214	0	-1.79769e+308	-1.79769e+308	0.0194336	0.0705669	no
XLOC_001344	XLOC_001344	ISCW000753	DS630914:96393-121017	ISG	IL	OK	5.16168	3.74081	-0.464492	0.482395	0.629525	0.755075	no
XLOC_001345	XLOC_001345	ISCW000755	DS630914:130447-130717	ISG	IL	OK	1000.08	1848.2	0.886006	-0.905665	0.365113	0.521091	no
XLOC_001346	XLOC_001346	ISCW001204	DS630980:16575-23216	ISG	IL	OK	0.61177	38.2772	5.96735	-4.88935	1.01168e-06	5.98091e-05	yes
XLOC_001347	XLOC_001347	ISCW016349	DS631248:35706-36003	ISG	IL	NOTEST	0	0	0	0	1	1	no
XLOC_001348	XLOC_001348	ISCW015599	DS631284:83966-85113	ISG	IL	OK	5.10145	9.607	0.913179	-0.977245	0.328448	0.483813	no
XLOC_001349	XLOC_001349	ISCW015600	DS631284:102298-103667	ISG	IL	NOTEST	0	0.782338	1.79769e+308	1.79769e+308	0.0416323	1	no
XLOC_001350	XLOC_001350	ISCW015602	DS631284:186186-188960	ISG	IL	OK	4103.03	2943.61	-0.479102	0.386701	0.698978	0.806578	no
XLOC_001351	XLOC_001351	ISCW015592	DS631284:2268-43449	ISG	IL	OK	261.052	226.608	-0.204141	0.191191	0.848376	0.909465	no
XLOC_001352	XLOC_001352	-	DS631284:108920-109002	ISG	IL	NOTEST	0	0	0	0	1	1	no
XLOC_001353	XLOC_001353	ISCW000651	DS631286:39253-55375	ISG	IL	OK	1.90675	2.91728	0.613511	-0.655081	0.512416	0.660622	no
XLOC_001354	XLOC_001354	ISCW000650	DS631286:7498-7792	ISG	IL	NOTEST	0	0	0	0	1	1	no
XLOC_001355	XLOC_001355	ISCW000652	DS631286:58380-69721	ISG	IL	OK	23.6565	14.3224	-0.723968	0.73309	0.463504	0.614132	no
XLOC_001356	XLOC_001356	ISCW015722	DS631302:61505-61577	ISG	IL	NOTEST	0	0	0	0	1	1	no
XLOC_001357	XLOC_001357	ISCW000065	DS631359:14357-14733	ISG	IL	NOTEST	0	0	0	0	1	1	no
XLOC_001358	XLOC_001358	ISCW000878	DS631374:1199-1921	ISG	IL	NOTEST	0	0	0	0	1	1	no
XLOC_001359	XLOC_001359	-	DS631374:11191-11264	ISG	IL	NOTEST	0	0	0	0	1	1	no
XLOC_001360	XLOC_001360	ISCW001459	DS631424:11249-12152	ISG	IL	OK	0	8.69693	1.79769e+308	1.79769e+308	0.158655	0.285968	no
XLOC_001361	XLOC_001361	ISCW001483	DS631518:10317-10590	ISG	IL	NOTEST	0	0	0	0	1	1	no
XLOC_001362	XLOC_001362	ISCW000419	DS631585:13221-21100	ISG	IL	NOTEST	0	0.42666	1.79769e+308	1.79769e+308	0.0786496	1	no
XLOC_001363	XLOC_001363	-	DS631585:122916-125531	ISG	IL	NOTEST	0	0	0	0	1	1	no
XLOC_001364	XLOC_001364	ISCW000420	DS631585:55769-57776	ISG	IL	NOTEST	0	0	0	0	1	1	no
XLOC_001365	XLOC_001365	ISCW000421	DS631585:83382-95490	ISG	IL	NOTEST	0	0	0	0	1	1	no
XLOC_001366	XLOC_001366	ISCW000422	DS631585:107017-116984	ISG	IL	NOTEST	0	0	0	0	1	1	no
XLOC_001367	XLOC_001367	ISCW000423	DS631585:122916-125531	ISG	IL	NOTEST	0	0	0	0	1	1	no
XLOC_001368	XLOC_001368	ISCW000300	DS631611:25488-31280	ISG	IL	OK	32.7768	0.637086	-5.68504	4.6035	4.15442e-06	0.000181859	yes
XLOC_001369	XLOC_001369	ISCW000808	DS631633:12553-14846	ISG	IL	NOTEST	0	0	0	0	1	1	no
XLOC_001370	XLOC_001370	ISCW000230	DS631644:42746-45781	ISG	IL	NOTEST	0.393512	0.221813	-0.827062	0.496471	0.619562	1	no
XLOC_001371	XLOC_001371	ISCW000418	DS631651:13183-13265	ISG	IL	NOTEST	0	0	0	0	1	1	no
XLOC_001372	XLOC_001372	ISCW001213	DS631656:27742-27816	ISG	IL	NOTEST	0	0	0	0	1	1	no
XLOC_001373	XLOC_001373	ISCW001748	DS631740:5491-7006	ISG	IL	OK	0.333176	11.409	5.09775	-5.1679	2.36733e-07	1.83452e-05	yes
XLOC_001374	XLOC_001374	ISCW001616	DS631756:22585-24379	ISG	IL	NOTEST	0	0	0	0	1	1	no
XLOC_001375	XLOC_001375	ISCW024084	DS631767:39-825	ISG	IL	NOTEST	0.188372	0.318543	0.757901	-0.371469	0.710288	1	no
XLOC_001376	XLOC_001376	ISCW001764	DS631778:18021-18852	ISG	IL	NOTEST	0.349526	0.295529	-0.242099	0.137017	0.891018	1	no
XLOC_001377	XLOC_001377	ISCW000946	DS631785:17364-17532	ISG	IL	NOTEST	0	0	0	0	1	1	no
XLOC_001378	XLOC_001378	ISCW001301	DS632014:14696-14769	ISG	IL	NOTEST	0	0	0	0	1	1	no
XLOC_001379	XLOC_001379	ISCW000009	DS632141:11348-37614	ISG	IL	OK	68.853	105.177	0.611231	-0.582834	0.560005	0.701092	no
XLOC_001380	XLOC_001380	ISCW000007	DS632141:4898-5274	ISG	IL	NOTEST	0	0	0	0	1	1	no
XLOC_001381	XLOC_001381	ISCW001543	DS632205:38876-72067	ISG	IL	NOTEST	0	0	0	0	1	1	no
XLOC_001382	XLOC_001382	ISCW000941	DS632238:18829-22120	ISG	IL	NOTEST	0	0	0	0	1	1	no
XLOC_001383	XLOC_001383	ISCW016344	DS632248:33434-33635	ISG	IL	NOTEST	0	0	0	0	1	1	no
XLOC_001384	XLOC_001384	ISCW001678	DS632296:1256-2632	ISG	IL	NOTEST	0	0	0	0	1	1	no
XLOC_001385	XLOC_001385	ISCW000590	DS632389:3770-9975	ISG	IL	NOTEST	0	0	0	0	1	1	no
XLOC_001386	XLOC_001386	ISCW001599	DS632446:10676-10750	ISG	IL	NOTEST	0	0	0	0	1	1	no
XLOC_001387	XLOC_001387	ISCW001280	DS632477:14446-14770	ISG	IL	NOTEST	0	0	0	0	1	1	no
XLOC_001388	XLOC_001388	-	DS632478:378739-378812	ISG	IL	NOTEST	0	0	0	0	1	1	no
XLOC_001389	XLOC_001389	ISCW016480	DS632478:52418-126253	ISG	IL	OK	4.48116	1.00757	-2.15299	2.21445	0.026798	0.0851373	no
XLOC_001390	XLOC_001390	ISCW000881	DS632491:7558-7630	ISG	IL	NOTEST	0	0	0	0	1	1	no
XLOC_001391	XLOC_001391	ISCW000001	DS632564:26248-26698	ISG	IL	NOTEST	0	0	0	0	1	1	no
XLOC_001392	XLOC_001392	ISCW015714	DS632566:518801-650771	ISG	IL	NOTEST	0	0	0	0	1	1	no
XLOC_001393	XLOC_001393	ISCW015710	DS632566:41253-128712	ISG	IL	NOTEST	0	0.893763	1.79769e+308	1.79769e+308	0.0416323	1	no
XLOC_001394	XLOC_001394	ISCW015712	DS632566:224097-224433	ISG	IL	NOTEST	0	0	0	0	1	1	no
XLOC_001395	XLOC_001395	ISCW015713	DS632566:412649-418013	ISG	IL	NOTEST	0	0	0	0	1	1	no
XLOC_001396	XLOC_001396	-	DS632566:518801-650771	ISG	IL	NOTEST	0	0	0	0	1	1	no
XLOC_001397	XLOC_001397	ISCW001082	DS632609:4340-5908	ISG	IL	OK	3.10895	0	-1.79769e+308	-1.79769e+308	0.0293909	0.0878738	no
XLOC_001398	XLOC_001398	ISCW000502	DS632691:4850-57389	ISG	IL	NOTEST	0	1.43647	1.79769e+308	1.79769e+308	0.0288898	1	no
XLOC_001399	XLOC_001399	-	DS632691:4850-57389	ISG	IL	NOTEST	0	0	0	0	1	1	no
XLOC_001400	XLOC_001400	ISCW001531	DS632697:51285-54712	ISG	IL	OK	2.66488	0.321885	-3.04945	1.91415	0.0556006	0.138936	no
XLOC_001401	XLOC_001401	ISCW001532	DS632697:58817-59189	ISG	IL	OK	7.95519	5.60519	-0.505134	0.494065	0.621261	0.748056	no
XLOC_001402	XLOC_001402	ISCW001534	DS632697:103737-104223	ISG	IL	OK	3.134	0	-1.79769e+308	-1.79769e+308	0.0194336	0.0705669	no
XLOC_001403	XLOC_001403	ISCW001533	DS632697:72332-72893	ISG	IL	NOTEST	0	0	0	0	1	1	no
XLOC_001404	XLOC_001404	-	DS632703:217018-217086	ISG	IL	NOTEST	0	0	0	0	1	1	no
XLOC_001405	XLOC_001405	-	DS632703:217315-217388	ISG	IL	NOTEST	0	0	0	0	1	1	no
XLOC_001406	XLOC_001406	-	DS632703:217617-217690	ISG	IL	NOTEST	0	0	0	0	1	1	no
XLOC_001407	XLOC_001407	ISCW001677	DS632703:292438-292900	ISG	IL	NOTEST	0	0	0	0	1	1	no
XLOC_001408	XLOC_001408	ISCW001673	DS632703:18195-118753	ISG	IL	NOTEST	0.143347	0.0969617	-0.564027	0.442668	0.658006	1	no
XLOC_001409	XLOC_001409	ISCW000083	DS632724:19674-25241	ISG	IL	OK	0.679545	3.33248	2.29395	-2.40232	0.0162915	0.0672943	no
XLOC_001410	XLOC_001410	ISCW015587	DS632740:39977-52882	ISG	IL	NOTEST	0.424732	0	-1.79769e+308	-1.79769e+308	0.0416323	1	no
XLOC_001411	XLOC_001411	ISCW015588	DS632740:66433-78780	ISG	IL	OK	1.45453	0	-1.79769e+308	-1.79769e+308	0.0216541	0.0754501	no
XLOC_001412	XLOC_001412	ISCW015589	DS632740:82779-82968	ISG	IL	NOTEST	0	0	0	0	1	1	no
XLOC_001413	XLOC_001413	ISCW015590	DS632740:97161-129241	ISG	IL	OK	10.1637	8.07272	-0.332297	0.35463	0.722867	0.822777	no
XLOC_001414	XLOC_001414	ISCW015591	DS632740:162350-163396	ISG	IL	OK	3.61981	0.706292	-2.35758	2.21986	0.026428	0.0845711	no
XLOC_001415	XLOC_001415	ISCW001254	DS632868:9017-10160	ISG	IL	NOTEST	0	0	0	0	1	1	no
XLOC_001416	XLOC_001416	ISCW001548	DS632925:14734-15037	ISG	IL	NOTEST	0	0	0	0	1	1	no
XLOC_001417	XLOC_001417	ISCW001550	DS632925:54983-62058	ISG	IL	OK	47.8866	29.5859	-0.694714	0.680635	0.496103	0.644883	no
XLOC_001418	XLOC_001418	ISCW001553	DS632925:102608-112689	ISG	IL	OK	1.47429	1.57755	0.0976657	-0.103008	0.917957	0.950184	no
XLOC_001419	XLOC_001419	ISCW001547	DS632925:371-608	ISG	IL	NOTEST	0	0	0	0	1	1	no
XLOC_001420	XLOC_001420	ISCW001549	DS632925:17040-54441	ISG	IL	OK	6.86818	11.4808	0.741222	-0.776474	0.437469	0.592715	no
XLOC_001421	XLOC_001421	ISCW001551	DS632925:64228-97404	ISG	IL	OK	20.8823	10.1264	-1.04416	1.07095	0.28419	0.438147	no
XLOC_001422	XLOC_001422	ISCW001552	DS632925:99499-102066	ISG	IL	OK	2.98627	2.18063	-0.453603	0.485313	0.627455	0.753379	no
XLOC_001423	XLOC_001423	ISCW001251	DS632944:29723-112824	ISG	IL	NOTEST	0.0196786	0	-1.79769e+308	-1.79769e+308	0.369441	1	no
XLOC_001424	XLOC_001424	ISCW000194	DS632966:44230-44587	ISG	IL	OK	4.36906	7.3882	0.757901	-0.704813	0.480926	0.629723	no
XLOC_001425	XLOC_001425	ISCW000935	DS632968:50014-50563	ISG	IL	NOTEST	0	1.08004	1.79769e+308	1.79769e+308	0.0786496	1	no
XLOC_001426	XLOC_001426	ISCW000936	DS632968:72779-119489	ISG	IL	NOTEST	0.179667	0	-1.79769e+308	-1.79769e+308	0.158655	1	no
XLOC_001427	XLOC_001427	ISCW016348	DS633010:95907-96344	ISG	IL	NOTEST	0	0	0	0	1	1	no
XLOC_001428	XLOC_001428	ISCW001120	DS633114:361-5043	ISG	IL	OK	30.7692	0	-1.79769e+308	-1.79769e+308	0.0162914	0.0672943	no
XLOC_001429	XLOC_001429	ISCW001159	DS633187:33184-73040	ISG	IL	NOTEST	0	0	0	0	1	1	no
XLOC_001430	XLOC_001430	ISCW015724	DS633234:91-5120	ISG	IL	NOTEST	0	0	0	0	1	1	no
XLOC_001431	XLOC_001431	ISCW015725	DS633234:13652-19320	ISG	IL	NOTEST	0	0	0	0	1	1	no
XLOC_001432	XLOC_001432	ISCW015727	DS633234:33333-37234	ISG	IL	OK	5.60669	1.5292	-1.87437	1.8596	0.0629428	0.152781	no
XLOC_001433	XLOC_001433	ISCW015728	DS633234:40552-48700	ISG	IL	OK	38.4438	21.4102	-0.844457	0.879133	0.379329	0.535251	no
XLOC_001434	XLOC_001434	ISCW015733	DS633234:128950-140687	ISG	IL	OK	8.77301	4.79969	-0.87013	0.918958	0.358118	0.514113	no
XLOC_001435	XLOC_001435	ISCW015734	DS633234:140758-141244	ISG	IL	NOTEST	0	0	0	0	1	1	no
XLOC_001436	XLOC_001436	ISCW015726	DS633234:20796-22751	ISG	IL	NOTEST	0.166461	0.703724	2.07983	-1.63232	0.102612	1	no
XLOC_001437	XLOC_001437	ISCW015729	DS633234:49570-50629	ISG	IL	OK	3.96593	13.6293	1.78098	-1.90255	0.0570993	0.141809	no
XLOC_001438	XLOC_001438	ISCW015730	DS633234:51132-54211	ISG	IL	OK	3.27801	2.46365	-0.412024	0.410271	0.681607	0.795659	no
XLOC_001439	XLOC_001439	ISCW015731	DS633234:70956-76303	ISG	IL	OK	3736.74	6001.31	0.683496	-0.545024	0.585737	0.722657	no
XLOC_001440	XLOC_001440	ISCW015732	DS633234:98167-106675	ISG	IL	OK	86.8272	78.6738	-0.142264	0.13924	0.88926	0.93453	no
XLOC_001441	XLOC_001441	ISCW024047	DS633289:0-358	ISG	IL	NOTEST	0	0	0	0	1	1	no
XLOC_001442	XLOC_001442	ISCW001506	DS633306:1644-1809	ISG	IL	NOTEST	0	0	0	0	1	1	no
XLOC_001443	XLOC_001443	ISCW024033	DS633319:202-5985	ISG	IL	OK	49.7539	11.767	-2.08006	2.17471	0.0296517	0.0885153	no
XLOC_001444	XLOC_001444	ISCW000273	DS633349:10953-11226	ISG	IL	NOTEST	0	0	0	0	1	1	no
XLOC_001445	XLOC_001445	ISCW024015	DS633368:479-1253	ISG	IL	OK	5.17274	0	-1.79769e+308	-1.79769e+308	0.0786496	0.175622	no
XLOC_001446	XLOC_001446	ISCW000908	DS633429:37855-45346	ISG	IL	OK	3.73435	6.70099	0.843517	-0.907027	0.364392	0.52058	no
XLOC_001447	XLOC_001447	ISCW001359	DS633434:12731-27169	ISG	IL	OK	81.7863	162.752	0.992747	-0.948374	0.342939	0.498185	no
XLOC_001448	XLOC_001448	ISCW001360	DS633434:35464-36158	ISG	IL	OK	1040.19	4588.68	2.14123	-2.19266	0.0283318	0.0878738	no
XLOC_001449	XLOC_001449	ISCW001361	DS633434:37984-41498	ISG	IL	NOTEST	0	0	0	0	1	1	no
XLOC_001450	XLOC_001450	ISCW001363	DS633434:46769-55929	ISG	IL	OK	17.4599	1.64029	-3.41202	2.1474	0.0317611	0.0929019	no
XLOC_001451	XLOC_001451	ISCW001364	DS633434:79543-131792	ISG	IL	OK	4.35074	0.501629	-3.11657	2.93286	0.00335856	0.025094	yes
XLOC_001452	XLOC_001452	ISCW001366	DS633434:157432-158083	ISG	IL	NOTEST	0	0	0	0	1	1	no
XLOC_001453	XLOC_001453	ISCW001367	DS633434:174475-253067	ISG	IL	OK	2.54608	0.548739	-2.21408	2.30984	0.0208972	0.0744318	no
XLOC_001454	XLOC_001454	ISCW001368	DS633434:288608-288761	ISG	IL	OK	0	22.723	1.79769e+308	1.79769e+308	0.158655	0.285968	no
XLOC_001455	XLOC_001455	ISCW024074	DS633539:614-2168	ISG	IL	OK	65.0225	20.9438	-1.63442	1.70103	0.0889368	0.192383	no
XLOC_001456	XLOC_001456	ISCW024079	DS633703:756-1026	ISG	IL	NOTEST	0	0	0	0	1	1	no
XLOC_001457	XLOC_001457	ISCW001461	DS633730:1077-34430	ISG	IL	OK	28.9537	2.39672	-3.59462	3.67591	0.000237005	0.00373894	yes
XLOC_001458	XLOC_001458	ISCW001462	DS633730:38754-41005	ISG	IL	OK	655.238	168.144	-1.96232	1.8766	0.0605726	0.148283	no
XLOC_001459	XLOC_001459	ISCW001463	DS633730:60688-76958	ISG	IL	OK	8.233	2.17714	-1.91898	1.99037	0.04655	0.120952	no
XLOC_001460	XLOC_001460	ISCW001464	DS633730:81231-81647	ISG	IL	OK	38.2242	81.4619	1.09164	-1.1464	0.251632	0.402207	no
XLOC_001461	XLOC_001461	ISCW024021	DS633735:4024-4324	ISG	IL	OK	51.1219	21.1319	-1.27452	1.34328	0.17918	0.312114	no
XLOC_001462	XLOC_001462	ISCW001067	DS633764:41904-41977	ISG	IL	NOTEST	0	0	0	0	1	1	no
XLOC_001463	XLOC_001463	ISCW001751	DS633773:11717-12068	ISG	IL	OK	5.30448	1.28143	-2.04945	1.2732	0.202947	0.342495	no
XLOC_001464	XLOC_001464	ISCW001750	DS633773:6211-6277	ISG	IL	NOTEST	0	0	0	0	1	1	no
XLOC_001465	XLOC_001465	ISCW001752	DS633773:20265-23482	ISG	IL	OK	529.238	168.615	-1.65018	1.73748	0.082302	0.182013	no
XLOC_001466	XLOC_001466	ISCW001753	DS633773:24889-29746	ISG	IL	OK	67.6279	10.6607	-2.66531	2.76528	0.00568741	0.0361586	yes
XLOC_001467	XLOC_001467	ISCW001600	DS633826:5986-6369	ISG	IL	OK	13.6794	0	-1.79769e+308	-1.79769e+308	0.0142954	0.066059	no
XLOC_001468	XLOC_001468	ISCW000508	DS633933:9957-18633	ISG	IL	NOTEST	0	0	0	0	1	1	no
XLOC_001469	XLOC_001469	ISCW000510	DS633933:44792-56716	ISG	IL	OK	2.28819	17.0914	2.90099	-3.05605	0.00224275	0.0188579	yes
XLOC_001470	XLOC_001470	ISCW016132	DS633949:29640-109044	ISG	IL	NOTEST	0	0	0	0	1	1	no
XLOC_001471	XLOC_001471	ISCW016131	DS633949:25507-27979	ISG	IL	OK	12.3036	9.60261	-0.357576	0.351675	0.725082	0.823915	no
XLOC_001472	XLOC_001472	ISCW000811	DS633978:93547-113315	ISG	IL	NOTEST	0	0	0	0	1	1	no
XLOC_001473	XLOC_001473	ISCW000814	DS633978:145777-146971	ISG	IL	NOTEST	0	0	0	0	1	1	no
XLOC_001474	XLOC_001474	ISCW001151	DS633993:6976-9734	ISG	IL	NOTEST	0	0	0	0	1	1	no
XLOC_001475	XLOC_001475	ISCW000515	DS634011:27271-38584	ISG	IL	OK	0	3.52887	1.79769e+308	1.79769e+308	0.158655	0.285968	no
XLOC_001476	XLOC_001476	ISCW024022	DS634033:473-689	ISG	IL	NOTEST	0	0	0	0	1	1	no
XLOC_001477	XLOC_001477	ISCW016134	DS634072:15225-41587	ISG	IL	OK	16.3637	7.69117	-1.08922	1.10863	0.26759	0.418569	no
XLOC_001478	XLOC_001478	ISCW016135	DS634072:41662-42336	ISG	IL	OK	9.97021	29.1806	1.54931	-1.6611	0.096693	0.20491	no
XLOC_001479	XLOC_001479	ISCW016136	DS634072:52088-178296	ISG	IL	OK	8.49655	0.989753	-3.10174	3.11335	0.00184974	0.016319	yes
XLOC_001480	XLOC_001480	ISCW016138	DS634072:215553-215989	ISG	IL	OK	22.2567	87.8189	1.98029	-2.05662	0.0397226	0.110363	no
XLOC_001481	XLOC_001481	-	DS634072:52088-178296	ISG	IL	NOTEST	0	0	0	0	1	1	no
XLOC_001482	XLOC_001482	ISCW024017	DS634103:1012-1597	ISG	IL	NOTEST	0	0	0	0	1	1	no
XLOC_001483	XLOC_001483	ISCW001077	DS634112:9474-9547	ISG	IL	NOTEST	0	0	0	0	1	1	no
XLOC_001484	XLOC_001484	ISCW001680	DS634125:2112-2310	ISG	IL	NOTEST	0	0	0	0	1	1	no
XLOC_001485	XLOC_001485	ISCW000416	DS634195:10910-12975	ISG	IL	OK	0	2.61798	1.79769e+308	1.79769e+308	0.158655	0.285968	no
XLOC_001486	XLOC_001486	ISCW024010	DS634263:51-396	ISG	IL	OK	368.8	471.41	0.354147	-0.348888	0.727174	0.825656	no
XLOC_001487	XLOC_001487	ISCW000372	DS634315:77172-108421	ISG	IL	NOTEST	0.201234	0.850731	2.07983	-1.63232	0.102612	1	no
XLOC_001488	XLOC_001488	ISCW015829	DS634350:29866-29939	ISG	IL	NOTEST	0	0	0	0	1	1	no
XLOC_001489	XLOC_001489	ISCW015831	DS634350:68022-82834	ISG	IL	OK	3.04082	8.60136	1.5001	-1.58297	0.113428	0.231725	no
XLOC_001490	XLOC_001490	ISCW015830	DS634350:59784-62881	ISG	IL	NOTEST	0	0	0	0	1	1	no
XLOC_001491	XLOC_001491	ISCW015832	DS634350:90185-91698	ISG	IL	NOTEST	0	0	0	0	1	1	no
XLOC_001492	XLOC_001492	ISCW001691	DS634422:27070-29942	ISG	IL	OK	10.6071	14.3638	0.437409	-0.440491	0.659582	0.77971	no
XLOC_001493	XLOC_001493	ISCW001692	DS634422:48617-48907	ISG	IL	NOTEST	0	0	0	0	1	1	no
XLOC_001494	XLOC_001494	ISCW001693	DS634422:49057-49395	ISG	IL	NOTEST	0	0	0	0	1	1	no
XLOC_001495	XLOC_001495	-	DS634422:49614-49696	ISG	IL	NOTEST	0	0	0	0	1	1	no
XLOC_001496	XLOC_001496	ISCW001064	DS634450:2778-3261	ISG	IL	NOTEST	0	0	0	0	1	1	no
XLOC_001497	XLOC_001497	ISCW001065	DS634450:4216-4390	ISG	IL	NOTEST	0	0	0	0	1	1	no
XLOC_001498	XLOC_001498	-	DS634467:92892-194770	ISG	IL	NOTEST	0	0	0	0	1	1	no
XLOC_001499	XLOC_001499	-	DS634467:226483-226556	ISG	IL	NOTEST	0	0	0	0	1	1	no
XLOC_001500	XLOC_001500	-	DS634467:277393-277479	ISG	IL	NOTEST	0	0	0	0	1	1	no
XLOC_001501	XLOC_001501	ISCW001728	DS634467:25138-31294	ISG	IL	NOTEST	0	0	0	0	1	1	no
XLOC_001502	XLOC_001502	ISCW001730	DS634467:46123-51376	ISG	IL	NOTEST	0.270154	0	-1.79769e+308	-1.79769e+308	0.0786496	1	no
XLOC_001503	XLOC_001503	ISCW001731	DS634467:80114-83051	ISG	IL	NOTEST	0.182682	0	-1.79769e+308	-1.79769e+308	0.158655	1	no
XLOC_001504	XLOC_001504	ISCW001732	DS634467:92892-194770	ISG	IL	OK	0.133692	1.92165	3.84536	-3.94016	8.14269e-05	0.00175542	yes
XLOC_001505	XLOC_001505	ISCW001736	DS634467:315116-315398	ISG	IL	NOTEST	0	0	0	0	1	1	no
XLOC_001506	XLOC_001506	ISCW001737	DS634467:427273-588408	ISG	IL	NOTEST	0	0	0	0	1	1	no
XLOC_001507	XLOC_001507	ISCW001555	DS634635:4003-7665	ISG	IL	NOTEST	0	0	0	0	1	1	no
XLOC_001508	XLOC_001508	ISCW001558	DS634635:16333-42811	ISG	IL	OK	80.7779	35.6342	-1.1807	1.179	0.238398	0.386676	no
XLOC_001509	XLOC_001509	ISCW001560	DS634635:87409-88720	ISG	IL	OK	9.21026	0	-1.79769e+308	-1.79769e+308	0.0216541	0.0754501	no
XLOC_001510	XLOC_001510	ISCW001556	DS634635:12266-12653	ISG	IL	OK	15.8087	20.5638	0.379389	-0.406463	0.684402	0.79738	no
XLOC_001511	XLOC_001511	ISCW001557	DS634635:12704-15788	ISG	IL	OK	16.5898	4.31596	-1.94254	1.588	0.112286	0.229843	no
XLOC_001512	XLOC_001512	ISCW001559	DS634635:51383-54050	ISG	IL	OK	13.0228	5.91065	-1.13965	1.17778	0.238883	0.38708	no
XLOC_001513	XLOC_001513	ISCW000506	DS634651:16220-16394	ISG	IL	NOTEST	0	0	0	0	1	1	no
XLOC_001514	XLOC_001514	ISCW024089	DS634668:883-1364	ISG	IL	NOTEST	0	0	0	0	1	1	no
XLOC_001515	XLOC_001515	ISCW000427	DS634730:14433-15558	ISG	IL	NOTEST	0	0.200766	1.79769e+308	1.79769e+308	0.158655	1	no
XLOC_001516	XLOC_001516	ISCW016199	DS634804:56477-56909	ISG	IL	NOTEST	0.486242	0	-1.79769e+308	-1.79769e+308	0.158655	1	no
XLOC_001517	XLOC_001517	ISCW016200	DS634804:207942-210581	ISG	IL	NOTEST	0	0	0	0	1	1	no
XLOC_001518	XLOC_001518	-	DS634813:97519-97601	ISG	IL	NOTEST	0	0	0	0	1	1	no
XLOC_001519	XLOC_001519	-	DS634813:130134-130207	ISG	IL	NOTEST	0	0	0	0	1	1	no
XLOC_001520	XLOC_001520	-	DS634813:147555-147639	ISG	IL	NOTEST	0	0	0	0	1	1	no
XLOC_001521	XLOC_001521	ISCW000341	DS634813:33164-34106	ISG	IL	OK	1.85459	247.756	7.06168	-4.43708	9.11894e-06	0.000346308	yes
XLOC_001522	XLOC_001522	ISCW000342	DS634813:34553-35591	ISG	IL	NOTEST	0.393512	1.77451	2.17294	-1.99899	0.0456096	1	no
XLOC_001523	XLOC_001523	ISCW000343	DS634813:35723-46194	ISG	IL	NOTEST	0.428785	1.45018	1.7579	-0.994888	0.319791	1	no
XLOC_001524	XLOC_001524	ISCW000347	DS634813:198972-244588	ISG	IL	NOTEST	1.07333	0.477638	-1.1681	1.22277	0.221416	1	no
XLOC_001525	XLOC_001525	ISCW000348	DS634813:417133-458239	ISG	IL	NOTEST	0.349235	0.0357919	-3.28649	2.70823	0.00676428	1	no
XLOC_001526	XLOC_001526	ISCW000349	DS634813:548262-553338	ISG	IL	NOTEST	0	0	0	0	1	1	no
XLOC_001527	XLOC_001527	ISCW000350	DS634813:575788-576089	ISG	IL	NOTEST	0	0	0	0	1	1	no
XLOC_001528	XLOC_001528	ISCW016427	DS634829:46473-48646	ISG	IL	NOTEST	0	0	0	0	1	1	no
XLOC_001529	XLOC_001529	ISCW016428	DS634829:114191-126065	ISG	IL	NOTEST	0	0	0	0	1	1	no
XLOC_001530	XLOC_001530	ISCW001083	DS634831:38-5375	ISG	IL	OK	8.30168	2.80768	-1.56403	0.958219	0.337952	0.493064	no
XLOC_001531	XLOC_001531	ISCW001379	DS634871:668-750	ISG	IL	NOTEST	0	0	0	0	1	1	no
XLOC_001532	XLOC_001532	ISCW001380	DS634871:7833-30558	ISG	IL	NOTEST	0	0.992678	1.79769e+308	1.79769e+308	0.0786496	1	no
XLOC_001533	XLOC_001533	ISCW001587	DS634905:3233-4042	ISG	IL	OK	1.9177	0	-1.79769e+308	-1.79769e+308	0.0194737	0.0705669	no
XLOC_001534	XLOC_001534	ISCW000067	DS634959:12954-13071	ISG	IL	NOTEST	0	0	0	0	1	1	no
XLOC_001535	XLOC_001535	ISCW001804	DS635054:18950-19116	ISG	IL	NOTEST	0	0	0	0	1	1	no
XLOC_001536	XLOC_001536	ISCW024026	DS635097:1284-2161	ISG	IL	NOTEST	0	0	0	0	1	1	no
XLOC_001537	XLOC_001537	ISCW001255	DS635119:935-6645	ISG	IL	OK	135.466	37.6096	-1.84876	1.87564	0.0607048	0.148575	no
XLOC_001538	XLOC_001538	ISCW001256	DS635119:8155-8506	ISG	IL	OK	96.2385	488.226	2.34286	-2.36001	0.0182742	0.070178	no
XLOC_001539	XLOC_001539	ISCW000513	DS635129:47583-61691	ISG	IL	NOTEST	0	0	0	0	1	1	no
XLOC_001540	XLOC_001540	ISCW000514	DS635129:77692-81285	ISG	IL	NOTEST	0	0	0	0	1	1	no
XLOC_001541	XLOC_001541	ISCW001754	DS635143:965-1265	ISG	IL	NOTEST	0	0	0	0	1	1	no
XLOC_001542	XLOC_001542	ISCW001755	DS635143:68494-69052	ISG	IL	NOTEST	0.622261	0.526131	-0.242099	0.137017	0.891018	1	no
XLOC_001543	XLOC_001543	ISCW016570	DS635218:52806-72696	ISG	IL	OK	0.548973	4.92015	3.16389	-3.30332	0.000955475	0.0103772	yes
XLOC_001544	XLOC_001544	ISCW016571	DS635218:81362-89044	ISG	IL	OK	6.92239	0	-1.79769e+308	-1.79769e+308	0.0786496	0.175622	no
XLOC_001545	XLOC_001545	ISCW016572	DS635218:100328-103524	ISG	IL	OK	2.04074	1.72547	-0.242099	0.137017	0.891018	0.93453	no
XLOC_001546	XLOC_001546	ISCW000392	DS635245:39142-40543	ISG	IL	OK	36.0843	14.1652	-1.34901	1.42064	0.155422	0.285968	no
XLOC_001547	XLOC_001547	ISCW000391	DS635245:5202-11640	ISG	IL	OK	12.5957	3.36312	-1.90506	1.79057	0.0733621	0.171258	no
XLOC_001548	XLOC_001548	ISCW000393	DS635245:58768-78122	ISG	IL	OK	549.449	331.982	-0.72688	0.616279	0.53771	0.681679	no
XLOC_001549	XLOC_001549	ISCW000454	DS635251:19677-19870	ISG	IL	NOTEST	0	0	0	0	1	1	no
XLOC_001550	XLOC_001550	ISCW015806	DS635313:520502-520700	ISG	IL	NOTEST	0	0	0	0	1	1	no
XLOC_001551	XLOC_001551	-	DS635313:792711-792793	ISG	IL	NOTEST	0	0	0	0	1	1	no
XLOC_001552	XLOC_001552	ISCW015810	DS635313:1118492-1118711	ISG	IL	NOTEST	0	0	0	0	1	1	no
XLOC_001553	XLOC_001553	ISCW015812	DS635313:1205920-1222235	ISG	IL	NOTEST	0.107791	0.182277	0.757901	-0.371469	0.710288	1	no
XLOC_001554	XLOC_001554	ISCW015814	DS635313:1239846-1247252	ISG	IL	OK	0	9.2564	1.79769e+308	1.79769e+308	0.158655	0.285968	no
XLOC_001555	XLOC_001555	ISCW015805	DS635313:495994-496066	ISG	IL	NOTEST	0	0	0	0	1	1	no
XLOC_001556	XLOC_001556	ISCW015807	DS635313:545875-546055	ISG	IL	NOTEST	0	0	0	0	1	1	no
XLOC_001557	XLOC_001557	ISCW015809	DS635313:894335-903442	ISG	IL	NOTEST	0	0	0	0	1	1	no
XLOC_001558	XLOC_001558	-	DS635313:1171061-1171134	ISG	IL	NOTEST	0	0	0	0	1	1	no
XLOC_001559	XLOC_001559	ISCW015813	DS635313:1228683-1229001	ISG	IL	NOTEST	0	0	0	0	1	1	no
XLOC_001560	XLOC_001560	ISCW001492	DS635400:123448-146469	ISG	IL	NOTEST	0	0	0	0	1	1	no
XLOC_001561	XLOC_001561	ISCW024075	DS635473:679-1240	ISG	IL	NOTEST	0	0	0	0	1	1	no
XLOC_001562	XLOC_001562	ISCW015624	DS635599:216953-217697	ISG	IL	OK	0	104.771	1.79769e+308	1.79769e+308	0.0210551	0.0748081	no
XLOC_001563	XLOC_001563	ISCW015630	DS635599:403430-409877	ISG	IL	NOTEST	0	0	0	0	1	1	no
XLOC_001564	XLOC_001564	ISCW015634	DS635599:453798-457591	ISG	IL	OK	16.2959	15.7467	-0.049454	0.0522251	0.958349	0.975012	no
XLOC_001565	XLOC_001565	ISCW015638	DS635599:502289-540396	ISG	IL	NOTEST	0.728963	1.20193	0.721432	-0.737353	0.460908	1	no
XLOC_001566	XLOC_001566	ISCW015640	DS635599:540836-543605	ISG	IL	OK	9.55087	6.2438	-0.613207	0.633869	0.526166	0.670586	no
XLOC_001567	XLOC_001567	ISCW015642	DS635599:544373-548412	ISG	IL	OK	9.6649	6.1993	-0.640648	0.679899	0.496568	0.645196	no
XLOC_001568	XLOC_001568	ISCW015645	DS635599:569069-577626	ISG	IL	OK	13.3068	26.6691	1.00301	-1.07725	0.281367	0.435081	no
XLOC_001569	XLOC_001569	ISCW015647	DS635599:600774-601350	ISG	IL	OK	38.7643	45.0348	0.21631	-0.224096	0.822683	0.892485	no
XLOC_001570	XLOC_001570	ISCW015649	DS635599:632441-655496	ISG	IL	OK	16.8179	61.8685	1.87921	-1.91327	0.0557133	0.139089	no
XLOC_001571	XLOC_001571	ISCW015652	DS635599:719972-739136	ISG	IL	OK	0.547147	5.25705	3.26425	-3.42811	0.000607802	0.0074285	yes
XLOC_001572	XLOC_001572	ISCW015657	DS635599:838146-842489	ISG	IL	OK	78.7955	78.1853	-0.0112152	0.0117046	0.990661	0.993444	no
XLOC_001573	XLOC_001573	ISCW015660	DS635599:854644-855763	ISG	IL	NOTEST	0	0	0	0	1	1	no
XLOC_001574	XLOC_001574	ISCW015662	DS635599:857824-901847	ISG	IL	NOTEST	0	0	0	0	1	1	no
XLOC_001575	XLOC_001575	ISCW015625	DS635599:224823-313795	ISG	IL	NOTEST	0	0	0	0	1	1	no
XLOC_001576	XLOC_001576	ISCW015628	DS635599:378935-393096	ISG	IL	NOTEST	0.294253	1.24398	2.07983	-1.63232	0.102612	1	no
XLOC_001577	XLOC_001577	ISCW015632	DS635599:419182-426687	ISG	IL	OK	4.27331	0.516164	-3.04945	2.86973	0.00410824	0.0289788	yes
XLOC_001578	XLOC_001578	ISCW015633	DS635599:428602-451323	ISG	IL	OK	3.47462	1.43767	-1.27313	1.34493	0.178646	0.311288	no
XLOC_001579	XLOC_001579	ISCW015635	DS635599:462896-469363	ISG	IL	OK	3.35423	2.36338	-0.505134	0.528846	0.596912	0.731018	no
XLOC_001580	XLOC_001580	ISCW015636	DS635599:469508-495019	ISG	IL	OK	2.68901	0.985225	-1.44855	1.52912	0.126235	0.251004	no
XLOC_001581	XLOC_001581	ISCW015637	DS635599:497400-501092	ISG	IL	OK	214.698	292.22	0.444743	-0.451004	0.651987	0.774163	no
XLOC_001582	XLOC_001582	ISCW015639	DS635599:502289-540396	ISG	IL	OK	7.7247	2.77274	-1.47817	1.50038	0.133517	0.261225	no
XLOC_001583	XLOC_001583	ISCW015641	DS635599:540836-543605	ISG	IL	OK	107.542	238.265	1.14766	-1.17161	0.241356	0.390204	no
XLOC_001584	XLOC_001584	ISCW015643	DS635599:549439-557986	ISG	IL	OK	37.8132	40.7913	0.109373	-0.11088	0.911711	0.946196	no
XLOC_001585	XLOC_001585	ISCW015644	DS635599:562676-567217	ISG	IL	OK	25.3295	12.8499	-0.979065	1.03711	0.299685	0.455605	no
XLOC_001586	XLOC_001586	ISCW015646	DS635599:580804-581014	ISG	IL	OK	10.9443	0	-1.79769e+308	-1.79769e+308	0.0416323	0.11081	no
XLOC_001587	XLOC_001587	ISCW015648	DS635599:608152-631045	ISG	IL	OK	111.743	57.959	-0.94708	0.899496	0.368389	0.52433	no
XLOC_001588	XLOC_001588	ISCW015650	DS635599:657483-667833	ISG	IL	OK	14.4333	29.9136	1.0514	-1.06668	0.286117	0.440525	no
XLOC_001589	XLOC_001589	ISCW015651	DS635599:678020-700143	ISG	IL	OK	1.03441	2.40517	1.21733	-1.24747	0.212223	0.352242	no
XLOC_001590	XLOC_001590	ISCW015653	DS635599:739195-751290	ISG	IL	OK	7.03495	20.3724	1.534	-1.59221	0.111338	0.228596	no
XLOC_001591	XLOC_001591	ISCW015654	DS635599:759783-776786	ISG	IL	OK	13.0736	0.195645	-6.06228	3.79683	0.000146557	0.0026512	yes
XLOC_001592	XLOC_001592	ISCW015655	DS635599:817245-836605	ISG	IL	NOTEST	0.119244	0.201645	0.757901	-0.371469	0.710288	1	no
XLOC_001593	XLOC_001593	ISCW015658	DS635599:843809-844118	ISG	IL	NOTEST	0	1.77103	1.79769e+308	1.79769e+308	0.158655	1	no
XLOC_001594	XLOC_001594	ISCW015659	DS635599:851080-852780	ISG	IL	OK	10.8349	27.025	1.31862	-1.40905	0.158819	0.286117	no
XLOC_001595	XLOC_001595	ISCW015661	DS635599:857824-901847	ISG	IL	OK	8.15051	1.98634	-2.03678	2.09441	0.0362237	0.102696	no
XLOC_001596	XLOC_001596	ISCW015663	DS635599:912191-916038	ISG	IL	OK	2.71683	1.06021	-1.35758	1.26624	0.205429	0.344156	no
XLOC_001597	XLOC_001597	ISCW015664	DS635599:921964-923333	ISG	IL	OK	75.816	9.15764	-3.04945	2.51223	0.0119971	0.0618406	no
XLOC_001598	XLOC_001598	ISCW015665	DS635599:928463-933675	ISG	IL	OK	25.1934	35.8645	0.509513	-0.517098	0.605088	0.737509	no
XLOC_001599	XLOC_001599	ISCW015666	DS635599:935359-938387	ISG	IL	OK	36.7934	14.4694	-1.34644	1.40494	0.16004	0.286797	no
XLOC_001600	XLOC_001600	ISCW000592	DS635766:4029-4352	ISG	IL	NOTEST	0	0	0	0	1	1	no
XLOC_001601	XLOC_001601	ISCW001501	DS635797:4169-7404	ISG	IL	OK	148.364	62.7219	-1.2421	1.29409	0.195634	0.334137	no
XLOC_001602	XLOC_001602	ISCW001502	DS635797:14881-18115	ISG	IL	OK	16.0186	54.0444	1.75439	-1.74952	0.0802006	0.178398	no
XLOC_001603	XLOC_001603	ISCW001503	DS635797:19289-39845	ISG	IL	OK	18.2693	2.79698	-2.70748	2.80748	0.00499307	0.0331564	yes
XLOC_001604	XLOC_001604	ISCW001076	DS635802:38343-39476	ISG	IL	OK	14.5924	24.6762	0.757901	-0.742939	0.457519	0.608522	no
XLOC_001605	XLOC_001605	ISCW000523	DS635917:24483-24562	ISG	IL	NOTEST	0	0	0	0	1	1	no
XLOC_001606	XLOC_001606	ISCW001432	DS635936:9374-32667	ISG	IL	OK	5.15697	7.94542	0.6236	-0.668415	0.503869	0.652417	no
XLOC_001607	XLOC_001607	ISCW001433	DS635936:32829-33962	ISG	IL	OK	1.29467	114.243	6.46338	-6.48076	9.12592e-11	2.82879e-08	yes
XLOC_001608	XLOC_001608	-	DS635936:46050-46118	ISG	IL	NOTEST	0	0	0	0	1	1	no
XLOC_001609	XLOC_001609	ISCW000264	DS635937:10265-10489	ISG	IL	NOTEST	0	0	0	0	1	1	no
XLOC_001610	XLOC_001610	ISCW000511	DS636017:4032-9124	ISG	IL	NOTEST	0	0	0	0	1	1	no
XLOC_001611	XLOC_001611	ISCW000512	DS636017:9140-9690	ISG	IL	NOTEST	0	0	0	0	1	1	no
XLOC_001612	XLOC_001612	ISCW024065	DS636067:533-1118	ISG	IL	NOTEST	0	0	0	0	1	1	no
XLOC_001613	XLOC_001613	ISCW001581	DS636088:52751-53008	ISG	IL	NOTEST	0	0	0	0	1	1	no
XLOC_001614	XLOC_001614	ISCW016284	DS636135:5270-6823	ISG	IL	OK	34.7235	13.6873	-1.34308	1.35699	0.174785	0.305996	no
XLOC_001615	XLOC_001615	ISCW016289	DS636135:446057-474193	ISG	IL	OK	55.8731	16.2428	-1.78235	1.72985	0.0836575	0.184442	no
XLOC_001616	XLOC_001616	-	DS636135:130868-130950	ISG	IL	NOTEST	0	0	0	0	1	1	no
XLOC_001617	XLOC_001617	-	DS636135:217646-217720	ISG	IL	NOTEST	0	0	0	0	1	1	no
XLOC_001618	XLOC_001618	ISCW016287	DS636135:220946-438538	ISG	IL	NOTEST	0	0	0	0	1	1	no
XLOC_001619	XLOC_001619	ISCW015897	DS636212:271212-271551	ISG	IL	NOTEST	0	0	0	0	1	1	no
XLOC_001620	XLOC_001620	ISCW015898	DS636212:332569-332887	ISG	IL	NOTEST	0	1.64029	1.79769e+308	1.79769e+308	0.158655	1	no
XLOC_001621	XLOC_001621	ISCW015893	DS636212:6416-12912	ISG	IL	OK	6.1121	1.01791	-2.58605	2.68104	0.00733931	0.0435911	yes
XLOC_001622	XLOC_001622	ISCW015894	DS636212:108114-108644	ISG	IL	NOTEST	0	0	0	0	1	1	no
XLOC_001623	XLOC_001623	ISCW015895	DS636212:177463-185113	ISG	IL	NOTEST	0.364223	0	-1.79769e+308	-1.79769e+308	0.158655	1	no
XLOC_001624	XLOC_001624	ISCW015896	DS636212:251276-251477	ISG	IL	NOTEST	0	0	0	0	1	1	no
XLOC_001625	XLOC_001625	ISCW015899	DS636212:471504-471776	ISG	IL	NOTEST	0	0	0	0	1	1	no
XLOC_001626	XLOC_001626	ISCW001588	DS636214:10381-12722	ISG	IL	NOTEST	0	0	0	0	1	1	no
XLOC_001627	XLOC_001627	ISCW001140	DS636221:41845-84243	ISG	IL	NOTEST	0	0	0	0	1	1	no
XLOC_001628	XLOC_001628	ISCW001142	DS636221:136101-138705	ISG	IL	OK	0	375.683	1.79769e+308	1.79769e+308	0.0222221	0.0762482	no
XLOC_001629	XLOC_001629	ISCW001143	DS636221:170186-171002	ISG	IL	OK	4.56097	239.095	5.7121	-3.60219	0.000315547	0.00460434	yes
XLOC_001630	XLOC_001630	ISCW001144	DS636221:225974-283158	ISG	IL	OK	0	416.041	1.79769e+308	1.79769e+308	0.0257882	0.0835239	no
XLOC_001631	XLOC_001631	ISCW001138	DS636221:15032-16134	ISG	IL	OK	0	4.09216	1.79769e+308	1.79769e+308	0.0416323	0.11081	no
XLOC_001632	XLOC_001632	ISCW001139	DS636221:16584-17406	ISG	IL	NOTEST	0	0.813906	1.79769e+308	1.79769e+308	0.130295	1	no
XLOC_001633	XLOC_001633	ISCW001141	DS636221:94890-98948	ISG	IL	OK	0	1522.19	1.79769e+308	1.79769e+308	0.021746	0.075715	no
XLOC_001634	XLOC_001634	ISCW001145	DS636221:225974-283158	ISG	IL	OK	14.1633	5.06982	-1.48215	1.52834	0.126427	0.251299	no
XLOC_001635	XLOC_001635	ISCW000743	DS636261:1583-1835	ISG	IL	NOTEST	0	0	0	0	1	1	no
XLOC_001636	XLOC_001636	ISCW000874	DS636268:5870-6215	ISG	IL	NOTEST	0	0	0	0	1	1	no
XLOC_001637	XLOC_001637	ISCW000792	DS636281:47521-47594	ISG	IL	NOTEST	0	0	0	0	1	1	no
XLOC_001638	XLOC_001638	ISCW001134	DS636345:6995-8176	ISG	IL	OK	2.66111	0.843752	-1.65714	1.14161	0.253614	0.404062	no
XLOC_001639	XLOC_001639	ISCW001135	DS636345:38532-39721	ISG	IL	OK	1.59673	1.68757	0.079829	-0.0666327	0.946874	0.968233	no
XLOC_001640	XLOC_001640	ISCW000090	DS636346:27330-36668	ISG	IL	OK	7.71885	8.39108	0.120471	-0.128716	0.897582	0.937215	no
XLOC_001641	XLOC_001641	ISCW001601	DS636390:156-71849	ISG	IL	NOTEST	0	0	0	0	1	1	no
XLOC_001642	XLOC_001642	ISCW001421	DS636406:4602-9591	ISG	IL	OK	28.6214	8.5474	-1.74354	1.76875	0.0769359	0.175622	no
XLOC_001643	XLOC_001643	ISCW001422	DS636406:18268-51655	ISG	IL	OK	3.6697	1.03426	-1.82706	1.8164	0.0693094	0.164204	no
XLOC_001644	XLOC_001644	-	DS636406:18268-51655	ISG	IL	NOTEST	0	0	0	0	1	1	no
XLOC_001645	XLOC_001645	ISCW001423	DS636406:18268-51655	ISG	IL	OK	6.16469	0.330942	-4.21938	4.23402	2.29547e-05	0.000685355	yes
XLOC_001646	XLOC_001646	ISCW000093	DS636411:76270-89638	ISG	IL	OK	5.77403	0	-1.79769e+308	-1.79769e+308	0.014149	0.066059	no
XLOC_001647	XLOC_001647	ISCW015802	DS636474:55424-62331	ISG	IL	NOTEST	0	0	0	0	1	1	no
XLOC_001648	XLOC_001648	ISCW000787	DS636476:4919-30690	ISG	IL	OK	31.7111	13.7731	-1.20313	1.18388	0.236461	0.384731	no
XLOC_001649	XLOC_001649	ISCW000789	DS636476:35383-39009	ISG	IL	OK	1.76108	3.47437	0.980293	-0.939865	0.347287	0.502274	no
XLOC_001650	XLOC_001650	ISCW000791	DS636476:64788-65731	ISG	IL	NOTEST	0.461508	0	-1.79769e+308	-1.79769e+308	0.158655	1	no
XLOC_001651	XLOC_001651	ISCW000788	DS636476:34041-34922	ISG	IL	OK	15.3688	5.74495	-1.41964	1.49744	0.13428	0.2623	no
XLOC_001652	XLOC_001652	ISCW000790	DS636476:41911-64188	ISG	IL	OK	12.0656	10.3746	-0.217852	0.224422	0.822429	0.892378	no
XLOC_001653	XLOC_001653	-	DS636598:51222-51304	ISG	IL	NOTEST	0	0	0	0	1	1	no
XLOC_001654	XLOC_001654	ISCW001218	DS636598:5076-6078	ISG	IL	NOTEST	0	0.231872	1.79769e+308	1.79769e+308	0.158655	1	no
XLOC_001655	XLOC_001655	ISCW001219	DS636598:19475-36703	ISG	IL	NOTEST	0	0	0	0	1	1	no
XLOC_001656	XLOC_001656	-	DS636613:53546-53619	ISG	IL	NOTEST	0	0	0	0	1	1	no
XLOC_001657	XLOC_001657	ISCW016292	DS636613:172812-174360	ISG	IL	OK	3.00597	2.88505	-0.0592351	0.0634254	0.949428	0.969806	no
XLOC_001658	XLOC_001658	ISCW016290	DS636613:53360-53433	ISG	IL	NOTEST	0	0	0	0	1	1	no
XLOC_001659	XLOC_001659	ISCW001053	DS636620:44424-73231	ISG	IL	OK	4.74771	0.113078	-5.39185	3.39081	0.000696859	0.0081972	yes
XLOC_001660	XLOC_001660	ISCW001052	DS636620:13680-19510	ISG	IL	NOTEST	0	0	0	0	1	1	no
XLOC_001661	XLOC_001661	ISCW001054	DS636620:91155-151382	ISG	IL	NOTEST	0.329076	0.166943	-0.979065	0.904178	0.365901	1	no
XLOC_001662	XLOC_001662	ISCW000674	DS636674:24083-25031	ISG	IL	OK	1.17701	0.995182	-0.242099	0.241117	0.809464	0.88383	no
XLOC_001663	XLOC_001663	ISCW015792	DS636710:26438-33947	ISG	IL	NOTEST	0	0	0	0	1	1	no
XLOC_001664	XLOC_001664	ISCW015789	DS636710:15708-21777	ISG	IL	NOTEST	0	0	0	0	1	1	no
XLOC_001665	XLOC_001665	ISCW015793	DS636710:70874-78168	ISG	IL	NOTEST	0	0	0	0	1	1	no
XLOC_001666	XLOC_001666	ISCW001286	DS636786:8850-27200	ISG	IL	OK	45.4501	14.3391	-1.66433	1.7193	0.0855596	0.187518	no
XLOC_001667	XLOC_001667	ISCW001285	DS636786:1976-8829	ISG	IL	OK	5861.59	6699.95	0.19286	-0.159899	0.872961	0.923964	no
XLOC_001668	XLOC_001668	ISCW001287	DS636786:34668-39009	ISG	IL	OK	1.18808	2.00907	0.757901	-0.643404	0.519962	0.665861	no
XLOC_001669	XLOC_001669	ISCW001288	DS636786:68885-86004	ISG	IL	OK	4.73372	0	-1.79769e+308	-1.79769e+308	0.0786496	0.175622	no
XLOC_001670	XLOC_001670	ISCW001289	DS636786:211652-213681	ISG	IL	NOTEST	0	0	0	0	1	1	no
XLOC_001671	XLOC_001671	ISCW001290	DS636786:239757-244556	ISG	IL	NOTEST	0	0	0	0	1	1	no
XLOC_001672	XLOC_001672	ISCW001291	DS636786:299867-300281	ISG	IL	OK	0.528694	2.68211	2.34286	-1.40638	0.159611	0.286117	no
XLOC_001673	XLOC_001673	ISCW001651	DS636787:47741-56043	ISG	IL	NOTEST	0	0	0	0	1	1	no
XLOC_001674	XLOC_001674	ISCW001652	DS636787:61360-63307	ISG	IL	OK	0	50.2268	1.79769e+308	1.79769e+308	0.0157122	0.0672943	no
XLOC_001675	XLOC_001675	ISCW001654	DS636787:121577-132438	ISG	IL	NOTEST	0	0.759283	1.79769e+308	1.79769e+308	0.0786496	1	no
XLOC_001676	XLOC_001676	ISCW001656	DS636787:185069-204976	ISG	IL	OK	52.5072	10.3904	-2.33726	2.32428	0.0201106	0.0721453	no
XLOC_001677	XLOC_001677	ISCW001657	DS636787:227262-248209	ISG	IL	OK	119.549	187.276	0.647569	-0.549295	0.582803	0.720044	no
XLOC_001678	XLOC_001678	ISCW001661	DS636787:334458-334770	ISG	IL	OK	60.2017	89.7245	0.575698	-0.61369	0.53942	0.683528	no
XLOC_001679	XLOC_001679	ISCW001662	DS636787:390829-391824	ISG	IL	NOTEST	1.03549	0.500296	-1.04945	0.842831	0.399323	1	no
XLOC_001680	XLOC_001680	ISCW001663	DS636787:630539-640754	ISG	IL	NOTEST	0	1.29692	1.79769e+308	1.79769e+308	0.0786496	1	no
XLOC_001681	XLOC_001681	ISCW001665	DS636787:684554-684977	ISG	IL	NOTEST	0.50659	0	-1.79769e+308	-1.79769e+308	0.158655	1	no
XLOC_001682	XLOC_001682	ISCW001667	DS636787:748439-751276	ISG	IL	OK	4.15561	2.02849	-1.03466	1.09457	0.273703	0.425756	no
XLOC_001683	XLOC_001683	ISCW001668	DS636787:761033-762348	ISG	IL	OK	104.759	513.409	2.29303	-2.32733	0.0199478	0.0716958	no
XLOC_001684	XLOC_001684	ISCW001653	DS636787:74711-77290	ISG	IL	OK	0	31.3733	1.79769e+308	1.79769e+308	0.0145156	0.066059	no
XLOC_001685	XLOC_001685	ISCW001655	DS636787:157402-162989	ISG	IL	NOTEST	0.124852	0.211128	0.757901	-0.371469	0.710288	1	no
XLOC_001686	XLOC_001686	ISCW001658	DS636787:227262-248209	ISG	IL	OK	53.3282	323.467	2.60065	-2.41826	0.0155951	0.0672341	no
XLOC_001687	XLOC_001687	ISCW001659	DS636787:278975-280856	ISG	IL	OK	7.51104	3.43684	-1.12793	1.19452	0.232274	0.37894	no
XLOC_001688	XLOC_001688	ISCW001660	DS636787:283084-284968	ISG	IL	OK	9.873	1.53774	-2.68267	2.77223	0.0055673	0.0355718	yes
XLOC_001689	XLOC_001689	ISCW001664	DS636787:657823-658117	ISG	IL	NOTEST	0	0	0	0	1	1	no
XLOC_001690	XLOC_001690	ISCW001666	DS636787:728454-742888	ISG	IL	OK	6.09481	8.08353	0.407404	-0.43623	0.66267	0.78218	no
XLOC_001691	XLOC_001691	ISCW001669	DS636787:763606-780417	ISG	IL	OK	175.938	53.4002	-1.72015	1.79195	0.0731405	0.171054	no
XLOC_001692	XLOC_001692	ISCW001670	DS636787:787133-795706	ISG	IL	OK	12.1227	61.4993	2.34286	-2.43966	0.0147012	0.066059	no
XLOC_001693	XLOC_001693	ISCW015691	DS636818:32463-74275	ISG	IL	OK	2.16402	0.406602	-2.41202	2.46954	0.0135286	0.066059	no
XLOC_001694	XLOC_001694	ISCW001202	DS636837:67678-105745	ISG	IL	OK	57.0536	2.73955	-4.38031	4.42283	9.7415e-06	0.000362434	yes
XLOC_001695	XLOC_001695	ISCW000793	DS636906:42-4881	ISG	IL	NOTEST	0	0	0	0	1	1	no
XLOC_001696	XLOC_001696	ISCW000794	DS636906:5621-12298	ISG	IL	NOTEST	0	1.18427	1.79769e+308	1.79769e+308	0.0786496	1	no
XLOC_001697	XLOC_001697	ISCW000734	DS636914:3280-3362	ISG	IL	NOTEST	0	0	0	0	1	1	no
XLOC_001698	XLOC_001698	ISCW016145	DS636921:212856-232438	ISG	IL	OK	14.0317	6.14385	-1.19147	1.25545	0.209316	0.348728	no
XLOC_001699	XLOC_001699	ISCW016147	DS636921:243658-277201	ISG	IL	OK	11.7521	3.67781	-1.676	1.7247	0.0845819	0.186047	no
XLOC_001700	XLOC_001700	ISCW016149	DS636921:292396-294487	ISG	IL	OK	0.0691635	12.0466	7.4444	-4.66648	3.0641e-06	0.000144373	yes
XLOC_001701	XLOC_001701	ISCW016150	DS636921:303058-313959	ISG	IL	OK	71.4474	17.9503	-1.99287	2.01616	0.0437829	0.115569	no
XLOC_001702	XLOC_001702	-	DS636921:436605-436678	ISG	IL	NOTEST	0	0	0	0	1	1	no
XLOC_001703	XLOC_001703	ISCW016155	DS636921:481643-489490	ISG	IL	OK	8.84907	0	-1.79769e+308	-1.79769e+308	0.0148203	0.0663218	no
XLOC_001704	XLOC_001704	ISCW016156	DS636921:572103-585405	ISG	IL	OK	10.0564	2.28922	-2.13518	2.19242	0.0283496	0.0878738	no
XLOC_001705	XLOC_001705	ISCW016157	DS636921:600111-605209	ISG	IL	OK	0	39.1104	1.79769e+308	1.79769e+308	0.0169474	0.0678946	no
XLOC_001706	XLOC_001706	ISCW016161	DS636921:691308-695389	ISG	IL	OK	441.687	137.976	-1.67861	1.49742	0.134283	0.2623	no
XLOC_001707	XLOC_001707	ISCW016164	DS636921:716465-721777	ISG	IL	NOTEST	0	0	0	0	1	1	no
XLOC_001708	XLOC_001708	ISCW016167	DS636921:768456-771138	ISG	IL	NOTEST	0.196334	0	-1.79769e+308	-1.79769e+308	0.0786496	1	no
XLOC_001709	XLOC_001709	ISCW016168	DS636921:774307-777770	ISG	IL	NOTEST	0.349314	0.1969	-0.827062	0.496471	0.619562	1	no
XLOC_001710	XLOC_001710	ISCW016146	DS636921:234564-235203	ISG	IL	OK	12.3794	15.8072	0.352644	-0.377841	0.705548	0.810896	no
XLOC_001711	XLOC_001711	ISCW016148	DS636921:279897-282076	ISG	IL	OK	5873.27	10306.3	0.811292	-0.645683	0.518484	0.664975	no
XLOC_001712	XLOC_001712	ISCW016151	DS636921:321026-325331	ISG	IL	OK	32.7217	71.1429	1.12047	-1.1783	0.238675	0.386907	no
XLOC_001713	XLOC_001713	ISCW016152	DS636921:332680-333625	ISG	IL	OK	8.42036	5.74559	-0.551427	0.588882	0.55594	0.697602	no
XLOC_001714	XLOC_001714	ISCW016153	DS636921:359175-361017	ISG	IL	NOTEST	0	0	0	0	1	1	no
XLOC_001715	XLOC_001715	ISCW016158	DS636921:613019-649592	ISG	IL	OK	3.56278	0.298256	-3.57838	3.49959	0.000465974	0.00610467	yes
XLOC_001716	XLOC_001716	ISCW016159	DS636921:654142-663226	ISG	IL	OK	7.85533	0.308921	-4.66836	2.94254	0.00325529	0.0245463	yes
XLOC_001717	XLOC_001717	ISCW016160	DS636921:668160-685582	ISG	IL	OK	16.982	10.467	-0.698164	0.736263	0.461571	0.612916	no
XLOC_001718	XLOC_001718	ISCW016162	DS636921:696634-698633	ISG	IL	OK	2.60481	8.80962	1.7579	-1.75077	0.0799856	0.178093	no
XLOC_001719	XLOC_001719	ISCW016163	DS636921:700289-700658	ISG	IL	OK	31.0534	49.0875	0.660604	-0.707279	0.479393	0.62886	no
XLOC_001720	XLOC_001720	ISCW016165	DS636921:722329-726990	ISG	IL	OK	6.54988	9.10696	0.475501	-0.510053	0.610014	0.741285	no
XLOC_001721	XLOC_001721	ISCW016166	DS636921:743266-745731	ISG	IL	OK	1.62775	1.22336	-0.412024	0.410271	0.681607	0.795659	no
XLOC_001722	XLOC_001722	ISCW001164	DS636962:1390-1962	ISG	IL	NOTEST	0	0	0	0	1	1	no
XLOC_001723	XLOC_001723	ISCW001166	DS636962:2587-3060	ISG	IL	NOTEST	0	0	0	0	1	1	no
XLOC_001724	XLOC_001724	ISCW001566	DS636985:1467-8950	ISG	IL	OK	2.07099	0	-1.79769e+308	-1.79769e+308	0.0175212	0.0688659	no
XLOC_001725	XLOC_001725	ISCW001757	DS637108:5081-17407	ISG	IL	NOTEST	0	0	0	0	1	1	no
XLOC_001726	XLOC_001726	ISCW001758	DS637108:44528-64135	ISG	IL	OK	51.6106	4.78724	-3.4304	3.51855	0.000433912	0.00575988	yes
XLOC_001727	XLOC_001727	ISCW000118	DS637111:13447-23181	ISG	IL	NOTEST	0	0	0	0	1	1	no
XLOC_001728	XLOC_001728	ISCW000120	DS637111:132254-132449	ISG	IL	NOTEST	0	0	0	0	1	1	no
XLOC_001729	XLOC_001729	ISCW000031	DS637178:14284-14357	ISG	IL	NOTEST	0	0	0	0	1	1	no
XLOC_001730	XLOC_001730	ISCW001186	DS637203:102507-103101	ISG	IL	NOTEST	0	0	0	0	1	1	no
XLOC_001731	XLOC_001731	ISCW001187	DS637203:202797-211679	ISG	IL	OK	1.60104	1.24957	-0.357576	0.351675	0.725082	0.823915	no
XLOC_001732	XLOC_001732	ISCW001188	DS637203:239862-247949	ISG	IL	OK	4.54095	14.3979	1.66479	-1.77059	0.0766285	0.175622	no
XLOC_001733	XLOC_001733	ISCW001189	DS637203:251105-252147	ISG	IL	NOTEST	0.783248	1.76599	1.17294	-1.13606	0.255932	1	no
XLOC_001734	XLOC_001734	ISCW001191	DS637203:269955-291546	ISG	IL	OK	4.30357	0.307498	-3.80688	3.56399	0.000365256	0.00507903	yes
XLOC_001735	XLOC_001735	ISCW001192	DS637203:302475-313534	ISG	IL	OK	2.91924	2.51314	-0.216104	0.231369	0.817028	0.888367	no
XLOC_001736	XLOC_001736	ISCW001190	DS637203:252201-257572	ISG	IL	OK	75.7458	19.9891	-1.92195	1.94857	0.0513467	0.130808	no
XLOC_001737	XLOC_001737	ISCW001193	DS637203:317880-348938	ISG	IL	OK	2.49243	1.05369	-1.2421	1.27946	0.200736	0.340216	no
XLOC_001738	XLOC_001738	ISCW001194	DS637203:391698-392538	ISG	IL	NOTEST	0	0.29132	1.79769e+308	1.79769e+308	0.158655	1	no
XLOC_001739	XLOC_001739	ISCW001195	DS637203:395586-396426	ISG	IL	OK	0	3.49584	1.79769e+308	1.79769e+308	0.0169474	0.0678946	no
XLOC_001740	XLOC_001740	ISCW001619	DS637221:40993-61248	ISG	IL	NOTEST	0.602662	1.01912	0.757901	-0.643404	0.519962	1	no
XLOC_001741	XLOC_001741	ISCW001620	DS637221:211031-225037	ISG	IL	NOTEST	0.0666236	0.45065	2.7579	-1.70981	0.0873001	1	no
XLOC_001742	XLOC_001742	ISCW001235	DS637229:26046-26206	ISG	IL	NOTEST	0	0	0	0	1	1	no
XLOC_001743	XLOC_001743	ISCW001413	DS637259:6757-7227	ISG	IL	NOTEST	0	0	0	0	1	1	no
XLOC_001744	XLOC_001744	-	DS637321:11675-68416	ISG	IL	NOTEST	0	0	0	0	1	1	no
XLOC_001745	XLOC_001745	ISCW000450	DS637321:11675-68416	ISG	IL	NOTEST	0	0	0	0	1	1	no
XLOC_001746	XLOC_001746	ISCW000452	DS637321:68605-68874	ISG	IL	NOTEST	0	0	0	0	1	1	no
XLOC_001747	XLOC_001747	ISCW000453	DS637321:88299-323102	ISG	IL	NOTEST	0	0	0	0	1	1	no
XLOC_001748	XLOC_001748	ISCW001304	DS637334:44543-46272	ISG	IL	OK	12.3854	1.74534	-2.82706	2.88901	0.00386457	0.0277364	yes
XLOC_001749	XLOC_001749	ISCW001302	DS637334:7581-25560	ISG	IL	OK	3.64815	14.3946	1.98029	-1.94672	0.0515678	0.13108	no
XLOC_001750	XLOC_001750	ISCW000233	DS637477:111949-115046	ISG	IL	NOTEST	0	0	0	0	1	1	no
XLOC_001751	XLOC_001751	ISCW024057	DS637501:1469-2105	ISG	IL	NOTEST	0	1.72087	1.79769e+308	1.79769e+308	0.0227501	1	no
XLOC_001752	XLOC_001752	ISCW001525	DS637575:4420-55227	ISG	IL	NOTEST	0.217766	0	-1.79769e+308	-1.79769e+308	0.158655	1	no
XLOC_001753	XLOC_001753	ISCW000184	DS637633:7851-8054	ISG	IL	NOTEST	0	0	0	0	1	1	no
XLOC_001754	XLOC_001754	ISCW015941	DS637651:8819-13415	ISG	IL	OK	7.88968	3.85426	-1.03351	1.09461	0.273689	0.425756	no
XLOC_001755	XLOC_001755	ISCW015942	DS637651:14586-38775	ISG	IL	OK	29.3709	1.84354	-3.99384	4.02283	5.75026e-05	0.00134849	yes
XLOC_001756	XLOC_001756	ISCW015944	DS637651:52553-67836	ISG	IL	OK	47.0064	51.1002	0.120471	-0.119087	0.905206	0.942088	no
XLOC_001757	XLOC_001757	ISCW015946	DS637651:90193-101954	ISG	IL	OK	280.295	215.448	-0.379603	0.376828	0.706301	0.811518	no
XLOC_001758	XLOC_001758	ISCW015943	DS637651:50314-52283	ISG	IL	OK	30.5226	21.1839	-0.526914	0.533119	0.593951	0.728606	no
XLOC_001759	XLOC_001759	ISCW015945	DS637651:77243-79163	ISG	IL	OK	390.542	345.516	-0.176723	0.183139	0.854689	0.912958	no
XLOC_001760	XLOC_001760	-	DS637651:90193-101954	ISG	IL	NOTEST	0	0	0	0	1	1	no
XLOC_001761	XLOC_001761	ISCW015948	DS637651:109921-119659	ISG	IL	OK	31.316	49.6636	0.66529	-0.674281	0.500133	0.648945	no
XLOC_001762	XLOC_001762	ISCW015949	DS637651:146965-166428	ISG	IL	OK	0.91295	7.33317	3.00583	-3.13094	0.0017425	0.0155282	yes
XLOC_001763	XLOC_001763	ISCW000385	DS637704:36519-36714	ISG	IL	NOTEST	0	0	0	0	1	1	no
XLOC_001764	XLOC_001764	ISCW000386	DS637704:39145-48361	ISG	IL	OK	16.1672	2.93832	-2.46	2.55354	0.0106633	0.0570416	no
XLOC_001765	XLOC_001765	ISCW000387	DS637704:58269-72123	ISG	IL	OK	59.1537	3.76927	-3.97211	4.04518	5.22833e-05	0.00124406	yes
XLOC_001766	XLOC_001766	ISCW000388	DS637704:96603-97833	ISG	IL	NOTEST	0	0	0	0	1	1	no
XLOC_001767	XLOC_001767	ISCW000389	DS637704:101763-118387	ISG	IL	NOTEST	0	0	0	0	1	1	no
XLOC_001768	XLOC_001768	ISCW000815	DS637760:485-12315	ISG	IL	NOTEST	0	0	0	0	1	1	no
XLOC_001769	XLOC_001769	ISCW001705	DS637800:9295-10069	ISG	IL	OK	1.05049	2.96068	1.49487	-1.32306	0.185815	0.321435	no
XLOC_001770	XLOC_001770	ISCW001706	DS637800:46735-89232	ISG	IL	NOTEST	0.110351	0.839732	2.92783	-2.36785	0.0178916	1	no
XLOC_001771	XLOC_001771	ISCW024052	DS637825:282-1149	ISG	IL	NOTEST	0	0	0	0	1	1	no
XLOC_001772	XLOC_001772	ISCW000798	DS637847:126975-127332	ISG	IL	NOTEST	0	0	0	0	1	1	no
XLOC_001773	XLOC_001773	ISCW000801	DS637847:198679-263104	ISG	IL	NOTEST	0.181444	0	-1.79769e+308	-1.79769e+308	0.0786496	1	no
XLOC_001774	XLOC_001774	ISCW000802	DS637847:307860-323831	ISG	IL	OK	2.681	0.41215	-2.70153	2.5462	0.0108904	0.0575322	no
XLOC_001775	XLOC_001775	ISCW000803	DS637847:326128-351111	ISG	IL	OK	8.78167	2.87195	-1.61247	1.67604	0.0937307	0.200223	no
XLOC_001776	XLOC_001776	ISCW000805	DS637847:356094-386552	ISG	IL	OK	13.815	2.518	-2.45588	2.55176	0.010718	0.0572278	no
XLOC_001777	XLOC_001777	ISCW000796	DS637847:34674-50684	ISG	IL	NOTEST	0.192175	0	-1.79769e+308	-1.79769e+308	0.0786496	1	no
XLOC_001778	XLOC_001778	ISCW000797	DS637847:122852-124025	ISG	IL	OK	13.9207	2.07708	-2.7446	2.58659	0.00969309	0.0533119	no
XLOC_001779	XLOC_001779	-	DS637847:135898-135980	ISG	IL	NOTEST	0	0	0	0	1	1	no
XLOC_001780	XLOC_001780	ISCW000800	DS637847:186980-198289	ISG	IL	OK	7.37065	3.72487	-0.984603	1.04364	0.296651	0.452733	no
XLOC_001781	XLOC_001781	-	DS637847:326128-351111	ISG	IL	NOTEST	0	0	0	0	1	1	no
XLOC_001782	XLOC_001782	ISCW024045	DS637858:23-875	ISG	IL	OK	3.55033	1.14356	-1.63442	1.66875	0.0951662	0.202646	no
XLOC_001783	XLOC_001783	ISCW001237	DS637885:39914-47470	ISG	IL	OK	0.231178	1.95465	3.07983	-1.88689	0.0591748	0.145545	no
XLOC_001784	XLOC_001784	ISCW000591	DS637941:10554-11106	ISG	IL	NOTEST	0.379459	0	-1.79769e+308	-1.79769e+308	0.158655	1	no
XLOC_001785	XLOC_001785	ISCW000255	DS637976:5507-5678	ISG	IL	NOTEST	0	0	0	0	1	1	no
XLOC_001786	XLOC_001786	ISCW024038	DS638005:67-142	ISG	IL	NOTEST	0	0	0	0	1	1	no
XLOC_001787	XLOC_001787	ISCW024039	DS638005:344-542	ISG	IL	OK	13267.9	23971.2	0.853364	-0.760227	0.447119	0.5995	no
XLOC_001788	XLOC_001788	ISCW000307	DS638051:6288-6516	ISG	IL	NOTEST	0	0	0	0	1	1	no
XLOC_001789	XLOC_001789	ISCW001375	DS638128:31062-31410	ISG	IL	NOTEST	0	0	0	0	1	1	no
XLOC_001790	XLOC_001790	ISCW001490	DS638221:12577-13060	ISG	IL	NOTEST	0	0	0	0	1	1	no
XLOC_001791	XLOC_001791	ISCW001078	DS638237:309269-309629	ISG	IL	NOTEST	0	0	0	0	1	1	no
XLOC_001792	XLOC_001792	ISCW001079	DS638237:347644-356732	ISG	IL	OK	1.35353	7.30256	2.43167	-2.58624	0.00970294	0.0533119	no
XLOC_001793	XLOC_001793	ISCW001080	DS638237:427546-445070	ISG	IL	OK	5.77247	3.0294	-0.930155	0.969056	0.332517	0.488365	no
XLOC_001794	XLOC_001794	ISCW001081	DS638237:476050-486115	ISG	IL	OK	3.98824	2.24808	-0.827062	0.496471	0.619562	0.747603	no
XLOC_001795	XLOC_001795	ISCW000402	DS638247:21468-64932	ISG	IL	NOTEST	0.361268	0.101819	-1.82706	1.12034	0.262568	1	no
XLOC_001796	XLOC_001796	ISCW001402	DS638250:33002-34554	ISG	IL	NOTEST	0	0	0	0	1	1	no
XLOC_001797	XLOC_001797	ISCW001403	DS638250:80840-83820	ISG	IL	NOTEST	0	0.394279	1.79769e+308	1.79769e+308	0.158655	1	no
XLOC_001798	XLOC_001798	ISCW000267	DS638279:4549-16547	ISG	IL	NOTEST	0	0	0	0	1	1	no
XLOC_001799	XLOC_001799	ISCW016442	DS638343:75142-75654	ISG	IL	OK	0	2.28319	1.79769e+308	1.79769e+308	0.0416323	0.11081	no
XLOC_001800	XLOC_001800	ISCW016444	DS638343:99577-101437	ISG	IL	OK	0	10.1385	1.79769e+308	1.79769e+308	0.0169474	0.0678946	no
XLOC_001801	XLOC_001801	ISCW016441	DS638343:779-1010	ISG	IL	NOTEST	0	0	0	0	1	1	no
XLOC_001802	XLOC_001802	-	DS638343:88339-88412	ISG	IL	NOTEST	0	0	0	0	1	1	no
XLOC_001803	XLOC_001803	ISCW001527	DS638370:1584-30627	ISG	IL	OK	6.93022	98.6489	3.83133	-3.85309	0.000116638	0.00229441	yes
XLOC_001804	XLOC_001804	ISCW001610	DS638426:56204-56699	ISG	IL	NOTEST	0.18973	1.44377	2.92783	-0.927251	0.353796	1	no
XLOC_001805	XLOC_001805	ISCW015801	DS638511:145370-145452	ISG	IL	NOTEST	0	0	0	0	1	1	no
XLOC_001806	XLOC_001806	ISCW001014	DS638559:2281-31420	ISG	IL	OK	7.54356	7.62881	0.0162129	-0.0170424	0.986403	0.990895	no
XLOC_001807	XLOC_001807	ISCW001015	DS638559:40770-41690	ISG	IL	NOTEST	0	0	0	0	1	1	no
XLOC_001808	XLOC_001808	ISCW001016	DS638559:45294-60042	ISG	IL	OK	22.0412	13.418	-0.71603	0.756491	0.449355	0.601219	no
XLOC_001809	XLOC_001809	ISCW000040	DS638569:41469-41721	ISG	IL	NOTEST	0	0	0	0	1	1	no
XLOC_001810	XLOC_001810	ISCW000042	DS638569:198763-237881	ISG	IL	NOTEST	0	0	0	0	1	1	no
XLOC_001811	XLOC_001811	ISCW000045	DS638569:301646-314200	ISG	IL	OK	0.50659	2.56998	2.34286	-1.40638	0.159611	0.286117	no
XLOC_001812	XLOC_001812	ISCW000046	DS638569:421240-425055	ISG	IL	NOTEST	0	0	0	0	1	1	no
XLOC_001813	XLOC_001813	ISCW000041	DS638569:109638-109944	ISG	IL	NOTEST	0	0	0	0	1	1	no
XLOC_001814	XLOC_001814	-	DS638569:198763-237881	ISG	IL	NOTEST	0	0	0	0	1	1	no
XLOC_001815	XLOC_001815	ISCW000044	DS638569:264724-271176	ISG	IL	OK	2.58828	1.45895	-0.827062	0.873556	0.38236	0.538138	no
XLOC_001816	XLOC_001816	ISCW024049	DS638704:1825-6172	ISG	IL	OK	27.1074	11.5238	-1.23406	1.28475	0.198879	0.338338	no
XLOC_001817	XLOC_001817	ISCW000030	DS638740:14561-25143	ISG	IL	NOTEST	0	0	0	0	1	1	no
XLOC_001818	XLOC_001818	ISCW001236	DS638809:721-15485	ISG	IL	NOTEST	0.842564	1.4248	0.757901	-0.371469	0.710288	1	no
XLOC_001819	XLOC_001819	ISCW000566	DS638852:28116-28437	ISG	IL	OK	0	11.203	1.79769e+308	1.79769e+308	0.0216541	0.0754501	no
XLOC_001820	XLOC_001820	ISCW001281	DS638956:39042-39232	ISG	IL	NOTEST	0	0	0	0	1	1	no
XLOC_001821	XLOC_001821	ISCW001321	DS638984:283648-290127	ISG	IL	OK	32.7446	72.5111	1.14694	-1.17346	0.24061	0.389272	no
XLOC_001822	XLOC_001822	ISCW001320	DS638984:245719-246033	ISG	IL	NOTEST	0	0	0	0	1	1	no
XLOC_001823	XLOC_001823	ISCW001322	DS638984:296830-322775	ISG	IL	OK	1.55314	2.36376	0.605898	-0.61617	0.537783	0.681679	no
XLOC_001824	XLOC_001824	ISCW000559	DS639094:52173-54503	ISG	IL	OK	5.20695	1.46752	-1.82706	1.4902	0.136173	0.264527	no
XLOC_001825	XLOC_001825	ISCW000560	DS639094:58986-72506	ISG	IL	OK	4.05551	3.42899	-0.242099	0.256651	0.797448	0.876299	no
XLOC_001826	XLOC_001826	ISCW000561	DS639094:93222-107197	ISG	IL	NOTEST	0	0	0	0	1	1	no
XLOC_001827	XLOC_001827	ISCW001711	DS639181:17922-67143	ISG	IL	OK	6.85668	2.6053	-1.39606	1.46401	0.143192	0.276383	no
XLOC_001828	XLOC_001828	ISCW000750	DS639274:58920-87265	ISG	IL	OK	20.108	0.361736	-5.79669	3.63666	0.000276193	0.00415703	yes
XLOC_001829	XLOC_001829	ISCW000841	DS639293:41133-45549	ISG	IL	NOTEST	0	0	0	0	1	1	no
XLOC_001830	XLOC_001830	ISCW001518	DS639305:14828-21598	ISG	IL	OK	2.23197	2.93559	0.395331	-0.416743	0.676867	0.792788	no
XLOC_001831	XLOC_001831	ISCW001517	DS639305:589-2616	ISG	IL	OK	1.58608	0	-1.79769e+308	-1.79769e+308	0.0416323	0.11081	no
XLOC_001832	XLOC_001832	ISCW001519	DS639305:25729-26773	ISG	IL	OK	1.69298	0.660663	-1.35758	1.26624	0.205429	0.344156	no
XLOC_001833	XLOC_001833	ISCW000232	DS639314:6981-7153	ISG	IL	NOTEST	0	0	0	0	1	1	no
XLOC_001834	XLOC_001834	ISCW001781	DS639343:966-1284	ISG	IL	NOTEST	0	0	0	0	1	1	no
XLOC_001835	XLOC_001835	ISCW001782	DS639343:37142-45859	ISG	IL	NOTEST	0	0	0	0	1	1	no
XLOC_001836	XLOC_001836	ISCW001070	DS639397:9360-10054	ISG	IL	OK	0	5.55985	1.79769e+308	1.79769e+308	0.158655	0.285968	no
XLOC_001837	XLOC_001837	ISCW000604	DS639500:82741-83106	ISG	IL	NOTEST	0	0	0	0	1	1	no
XLOC_001838	XLOC_001838	-	DS639500:103565-103638	ISG	IL	NOTEST	0	0	0	0	1	1	no
XLOC_001839	XLOC_001839	ISCW001121	DS639501:36543-64550	ISG	IL	OK	41.9514	13.4847	-1.6374	1.65327	0.0982756	0.207726	no
XLOC_001840	XLOC_001840	ISCW001122	DS639501:64937-65126	ISG	IL	NOTEST	0	0	0	0	1	1	no
XLOC_001841	XLOC_001841	ISCW001126	DS639501:107958-127340	ISG	IL	OK	5.59039	0.94535	-2.56403	2.62398	0.00869096	0.0493693	yes
XLOC_001842	XLOC_001842	ISCW001128	DS639501:193073-195784	ISG	IL	OK	13.8074	47.4014	1.77949	-1.77622	0.0756962	0.175622	no
XLOC_001843	XLOC_001843	ISCW001130	DS639501:235818-247117	ISG	IL	OK	85.1311	259.127	1.6059	-1.72029	0.0853805	0.187197	no
XLOC_001844	XLOC_001844	ISCW001123	DS639501:65785-70063	ISG	IL	OK	533.105	382.736	-0.478069	0.413609	0.679161	0.794339	no
XLOC_001845	XLOC_001845	ISCW001124	DS639501:73507-79380	ISG	IL	OK	128.015	174.735	0.448854	-0.434965	0.663588	0.782993	no
XLOC_001846	XLOC_001846	ISCW001125	DS639501:87091-107395	ISG	IL	OK	27.7078	27.4539	-0.0132804	0.013823	0.988971	0.992606	no
XLOC_001847	XLOC_001847	ISCW001127	DS639501:138831-159554	ISG	IL	OK	25.3411	1.39232	-4.18592	4.21005	2.55309e-05	0.000743182	yes
XLOC_001848	XLOC_001848	ISCW001129	DS639501:209729-235024	ISG	IL	OK	11.8463	60.1846	2.34495	-2.23857	0.0251837	0.0824058	no
XLOC_001849	XLOC_001849	ISCW001131	DS639501:247428-266785	ISG	IL	OK	23.1901	20.6969	-0.164097	0.165632	0.868447	0.921659	no
XLOC_001850	XLOC_001850	ISCW001132	DS639501:286800-288315	ISG	IL	NOTEST	0	0.140852	1.79769e+308	1.79769e+308	0.158655	1	no
XLOC_001851	XLOC_001851	ISCW001133	DS639501:309698-310243	ISG	IL	NOTEST	0	0	0	0	1	1	no
XLOC_001852	XLOC_001852	ISCW001720	DS639537:44036-48207	ISG	IL	NOTEST	0.141473	0.837322	2.56526	-2.06019	0.0393802	1	no
XLOC_001853	XLOC_001853	ISCW001672	DS639564:40179-40341	ISG	IL	NOTEST	0	0	0	0	1	1	no
XLOC_001854	XLOC_001854	ISCW001589	DS639692:8838-23063	ISG	IL	OK	4.21076	3.41192	-0.3035	0.324647	0.745448	0.83852	no
XLOC_001855	XLOC_001855	ISCW001590	DS639692:26684-40582	ISG	IL	OK	89.4265	28.9296	-1.62816	1.59771	0.110108	0.226476	no
XLOC_001856	XLOC_001856	ISCW001593	DS639692:64766-65261	ISG	IL	OK	2.27676	1.92503	-0.242099	0.214664	0.83003	0.897484	no
XLOC_001857	XLOC_001857	ISCW001594	DS639692:66344-66557	ISG	IL	NOTEST	0	0	0	0	1	1	no
XLOC_001858	XLOC_001858	ISCW001595	DS639692:66890-103554	ISG	IL	NOTEST	0	0	0	0	1	1	no
XLOC_001859	XLOC_001859	ISCW001597	DS639692:107133-107559	ISG	IL	NOTEST	0	0	0	0	1	1	no
XLOC_001860	XLOC_001860	ISCW001591	DS639692:26684-40582	ISG	IL	OK	18.995	24.0449	0.340113	-0.347321	0.72835	0.826338	no
XLOC_001861	XLOC_001861	ISCW001592	DS639692:42052-63981	ISG	IL	OK	407.19	254.499	-0.678046	0.601677	0.547389	0.690492	no
XLOC_001862	XLOC_001862	ISCW001598	DS639692:189489-189927	ISG	IL	NOTEST	0	0	0	0	1	1	no
XLOC_001863	XLOC_001863	ISCW000668	DS639695:9342-9686	ISG	IL	NOTEST	0	0	0	0	1	1	no
XLOC_001864	XLOC_001864	ISCW000669	DS639695:9706-12054	ISG	IL	OK	98.7627	103.016	0.060828	-0.0618874	0.950652	0.970625	no
XLOC_001865	XLOC_001865	ISCW000667	DS639695:7910-9181	ISG	IL	OK	15.812	2.5225	-2.64809	2.62016	0.00878886	0.0497529	yes
XLOC_001866	XLOC_001866	ISCW001343	DS639759:10079-15494	ISG	IL	NOTEST	0	0	0	0	1	1	no
XLOC_001867	XLOC_001867	ISCW000435	DS639811:14855-24450	ISG	IL	OK	7.03856	19.8373	1.49487	-1.53436	0.12494	0.249077	no
XLOC_001868	XLOC_001868	ISCW001418	DS639824:31799-81589	ISG	IL	NOTEST	0.353857	0.19946	-0.827062	0.496471	0.619562	1	no
XLOC_001869	XLOC_001869	ISCW015610	DS639853:7619-25567	ISG	IL	OK	2.14405	0.201425	-3.41202	2.1474	0.0317611	0.0929019	no
XLOC_001870	XLOC_001870	ISCW015613	DS639853:73110-82787	ISG	IL	OK	17.8393	33.3813	0.903979	-0.906134	0.364865	0.520996	no
XLOC_001871	XLOC_001871	ISCW015615	DS639853:186837-199456	ISG	IL	OK	5341.84	5326.42	-0.004169	0.00330598	0.997362	0.998088	no
XLOC_001872	XLOC_001872	ISCW015616	DS639853:211367-234637	ISG	IL	OK	51.1345	52.9977	0.0516321	-0.0508174	0.959471	0.975037	no
XLOC_001873	XLOC_001873	-	DS639853:340910-382692	ISG	IL	NOTEST	0	0	0	0	1	1	no
XLOC_001874	XLOC_001874	ISCW015622	DS639853:462927-476703	ISG	IL	OK	8.88451	3.55112	-1.32302	1.3982	0.162053	0.288511	no
XLOC_001875	XLOC_001875	ISCW015609	DS639853:4962-7199	ISG	IL	OK	4.46593	0.580924	-2.94254	1.84738	0.0646914	0.155511	no
XLOC_001876	XLOC_001876	ISCW015611	DS639853:28096-55778	ISG	IL	OK	23.8811	22.5673	-0.0816344	0.0834058	0.933529	0.960395	no
XLOC_001877	XLOC_001877	ISCW015614	DS639853:96201-178077	ISG	IL	OK	4.9445	2.31125	-1.09715	1.15403	0.24849	0.398146	no
XLOC_001878	XLOC_001878	-	DS639853:330308-330390	ISG	IL	NOTEST	0	0	0	0	1	1	no
XLOC_001879	XLOC_001879	ISCW015619	DS639853:340910-382692	ISG	IL	OK	2.50033	0.24393	-3.35758	3.155	0.00160499	0.0147747	yes
XLOC_001880	XLOC_001880	ISCW015621	DS639853:442403-458307	ISG	IL	OK	1.87504	0	-1.79769e+308	-1.79769e+308	0.0154857	0.0668948	no
XLOC_001881	XLOC_001881	ISCW001739	DS639866:37854-39867	ISG	IL	OK	33.111	29.4746	-0.167836	0.165371	0.868652	0.921659	no
XLOC_001882	XLOC_001882	ISCW001740	DS639866:57166-67522	ISG	IL	OK	18.3081	58.5964	1.67833	-1.67578	0.0937815	0.200294	no
XLOC_001883	XLOC_001883	-	DS639900:150198-150262	ISG	IL	NOTEST	0	0	0	0	1	1	no
XLOC_001884	XLOC_001884	ISCW015771	DS639900:188538-211268	ISG	IL	OK	1.87217	6.17349	1.72138	-1.84458	0.0650989	0.156458	no
XLOC_001885	XLOC_001885	ISCW015772	DS639900:221419-228661	ISG	IL	NOTEST	0	0	0	0	1	1	no
XLOC_001886	XLOC_001886	ISCW015774	DS639900:250726-276920	ISG	IL	OK	40.7316	12.3581	-1.72069	1.75815	0.0787227	0.175622	no
XLOC_001887	XLOC_001887	ISCW015776	DS639900:340262-346606	ISG	IL	NOTEST	0	0.74264	1.79769e+308	1.79769e+308	0.158655	1	no
XLOC_001888	XLOC_001888	ISCW015769	DS639900:5241-28319	ISG	IL	NOTEST	0.149436	0.379051	1.34286	-1.01964	0.307898	1	no
XLOC_001889	XLOC_001889	ISCW015773	DS639900:246701-248302	ISG	IL	NOTEST	0.766939	0	-1.79769e+308	-1.79769e+308	0.0786496	1	no
XLOC_001890	XLOC_001890	ISCW015775	DS639900:284097-284400	ISG	IL	OK	107.177	55.3785	-0.952593	1.00521	0.314797	0.471598	no
XLOC_001891	XLOC_001891	ISCW015777	DS639900:352031-353142	ISG	IL	OK	4.21978	4.07758	-0.049454	0.0530096	0.957724	0.974635	no
XLOC_001892	XLOC_001892	ISCW001378	DS639904:5232-10081	ISG	IL	NOTEST	0	0	0	0	1	1	no
XLOC_001893	XLOC_001893	ISCW000368	DS639905:6199-6422	ISG	IL	NOTEST	0	0	0	0	1	1	no
XLOC_001894	XLOC_001894	-	DS639961:44173-44246	ISG	IL	NOTEST	0	0	0	0	1	1	no
XLOC_001895	XLOC_001895	ISCW000425	DS639961:33126-42822	ISG	IL	NOTEST	0	0.51726	1.79769e+308	1.79769e+308	0.158655	1	no
XLOC_001896	XLOC_001896	ISCW000369	DS640004:22860-24934	ISG	IL	OK	2.93513	3.97071	0.435973	-0.443456	0.657436	0.778328	no
XLOC_001897	XLOC_001897	ISCW000370	DS640004:27119-28207	ISG	IL	NOTEST	0	0	0	0	1	1	no
XLOC_001898	XLOC_001898	ISCW015779	DS640074:23066-30370	ISG	IL	OK	2.7265	4.30322	0.658365	-0.690191	0.490074	0.638856	no
XLOC_001899	XLOC_001899	ISCW015780	DS640074:33670-47803	ISG	IL	OK	4.54569	18.2564	2.00583	-2.121	0.0339218	0.0980961	no
XLOC_001900	XLOC_001900	ISCW015782	DS640074:65579-88915	ISG	IL	OK	21.4453	13.2995	-0.689295	0.685913	0.492768	0.641858	no
XLOC_001901	XLOC_001901	ISCW015781	DS640074:51924-60423	ISG	IL	OK	2.48783	3.19731	0.361972	-0.387828	0.698143	0.806006	no
XLOC_001902	XLOC_001902	ISCW015850	DS640098:13547-14880	ISG	IL	OK	6.87072	25.2009	1.87494	-1.94686	0.0515513	0.13108	no
XLOC_001903	XLOC_001903	-	DS640098:50995-51077	ISG	IL	NOTEST	0	0	0	0	1	1	no
XLOC_001904	XLOC_001904	ISCW015854	DS640098:62048-118808	ISG	IL	OK	10.5464	3.17389	-1.73242	1.79639	0.0724332	0.169642	no
XLOC_001905	XLOC_001905	ISCW015855	DS640098:164456-167229	ISG	IL	NOTEST	0	0	0	0	1	1	no
XLOC_001906	XLOC_001906	ISCW015856	DS640098:183165-193842	ISG	IL	NOTEST	0.38347	0.648458	0.757901	-0.371469	0.710288	1	no
XLOC_001907	XLOC_001907	ISCW015857	DS640098:211453-222373	ISG	IL	OK	1.10422	0.329517	-1.7446	1.63374	0.102313	0.214622	no
XLOC_001908	XLOC_001908	ISCW015858	DS640098:256658-280962	ISG	IL	OK	26.6839	1.56678	-4.0901	4.13065	3.61745e-05	0.000934428	yes
XLOC_001909	XLOC_001909	ISCW015859	DS640098:295599-310238	ISG	IL	OK	18.5676	31.1022	0.744226	-0.751137	0.452571	0.604464	no
XLOC_001910	XLOC_001910	-	DS640098:316553-360281	ISG	IL	NOTEST	0	0	0	0	1	1	no
XLOC_001911	XLOC_001911	-	DS640098:316553-360281	ISG	IL	NOTEST	0	0	0	0	1	1	no
XLOC_001912	XLOC_001912	ISCW015851	DS640098:14923-34351	ISG	IL	OK	9.73119	5.99948	-0.697779	0.73818	0.460405	0.61158	no
XLOC_001913	XLOC_001913	ISCW015860	DS640098:311925-313007	ISG	IL	NOTEST	0.373698	0.658265	0.816795	-0.656846	0.51128	1	no
XLOC_001914	XLOC_001914	ISCW015861	DS640098:316553-360281	ISG	IL	OK	6.60809	3.68642	-0.842012	0.89067	0.373106	0.529115	no
XLOC_001915	XLOC_001915	ISCW015864	DS640098:384227-404523	ISG	IL	OK	2280.38	430.142	-2.40639	1.97424	0.0483544	0.124177	no
XLOC_001916	XLOC_001916	ISCW015865	DS640098:446628-466129	ISG	IL	NOTEST	0.570073	0	-1.79769e+308	-1.79769e+308	0.158655	1	no
XLOC_001917	XLOC_001917	ISCW015866	DS640098:496156-519592	ISG	IL	OK	3.82636	0.294113	-3.70153	2.33374	0.0196096	0.0707463	no
XLOC_001918	XLOC_001918	ISCW001297	DS640112:10496-26116	ISG	IL	NOTEST	0	0	0	0	1	1	no
XLOC_001919	XLOC_001919	ISCW001298	DS640112:26400-34053	ISG	IL	OK	28.7098	59.3378	1.04741	-1.10806	0.267835	0.418844	no
XLOC_001920	XLOC_001920	ISCW001300	DS640112:85226-94908	ISG	IL	NOTEST	0.364223	0	-1.79769e+308	-1.79769e+308	0.158655	1	no
XLOC_001921	XLOC_001921	ISCW001296	DS640112:10496-26116	ISG	IL	NOTEST	0.761272	0.198051	-1.94254	1.588	0.112286	1	no
XLOC_001922	XLOC_001922	ISCW001299	DS640112:43622-84066	ISG	IL	OK	5.37438	1.05677	-2.34644	2.42786	0.0151882	0.0668948	no
XLOC_001923	XLOC_001923	ISCW001630	DS640123:112-64035	ISG	IL	OK	11.9189	5.77696	-1.04487	1.09131	0.275135	0.427635	no
XLOC_001924	XLOC_001924	ISCW001456	DS640182:11729-12423	ISG	IL	NOTEST	0	0	0	0	1	1	no
XLOC_001925	XLOC_001925	ISCW000910	DS640318:9754-16882	ISG	IL	OK	0.958335	2.59292	1.43597	-1.49234	0.13561	0.264104	no
XLOC_001926	XLOC_001926	ISCW000911	DS640318:20941-28669	ISG	IL	OK	0.633708	33.6488	5.73059	-5.55643	2.75345e-08	3.28952e-06	yes
XLOC_001927	XLOC_001927	ISCW000524	DS640322:4185-12155	ISG	IL	OK	225.352	48.8918	-2.20452	2.14043	0.0323197	0.094227	no
XLOC_001928	XLOC_001928	ISCW016445	DS640379:22126-33918	ISG	IL	NOTEST	0.125717	0	-1.79769e+308	-1.79769e+308	0.158655	1	no
XLOC_001929	XLOC_001929	ISCW016452	DS640379:314636-328185	ISG	IL	OK	6.89056	0.847428	-3.02346	3.08579	0.00203013	0.0175991	yes
XLOC_001930	XLOC_001930	ISCW016454	DS640379:339585-342127	ISG	IL	OK	31.6119	25.7384	-0.296547	0.309188	0.757178	0.846154	no
XLOC_001931	XLOC_001931	ISCW016457	DS640379:383359-409176	ISG	IL	OK	43.5846	27.7187	-0.652961	0.651505	0.514721	0.662956	no
XLOC_001932	XLOC_001932	ISCW016458	DS640379:420112-430589	ISG	IL	OK	25.5967	10.3507	-1.30623	1.37054	0.170518	0.300595	no
XLOC_001933	XLOC_001933	ISCW016446	DS640379:35970-71400	ISG	IL	OK	6.67194	437.145	6.03386	-5.44276	5.24606e-08	5.67614e-06	yes
XLOC_001934	XLOC_001934	ISCW016447	DS640379:156099-158632	ISG	IL	OK	15.6335	10.5747	-0.564027	0.596199	0.551042	0.693733	no
XLOC_001935	XLOC_001935	ISCW016448	DS640379:159133-292298	ISG	IL	OK	119.057	9.76951	-3.60722	3.49179	0.000479794	0.00625313	yes
XLOC_001936	XLOC_001936	ISCW016450	DS640379:294517-295711	ISG	IL	NOTEST	0.148938	1.00744	2.7579	-1.70981	0.0873001	1	no
XLOC_001937	XLOC_001937	ISCW016451	DS640379:310662-311490	ISG	IL	OK	1.23658	0	-1.79769e+308	-1.79769e+308	0.0210387	0.0747731	no
XLOC_001938	XLOC_001938	ISCW016453	DS640379:334676-339266	ISG	IL	OK	317.373	352.741	0.152433	-0.150199	0.880607	0.929561	no
XLOC_001939	XLOC_001939	ISCW016455	DS640379:355391-360605	ISG	IL	OK	23.2307	1.02479	-4.50263	4.17614	2.96501e-05	0.000817444	yes
XLOC_001940	XLOC_001940	ISCW016456	DS640379:369364-379639	ISG	IL	OK	1.20272	0	-1.79769e+308	-1.79769e+308	0.0786496	0.175622	no
XLOC_001941	XLOC_001941	ISCW001384	DS640459:7054-7127	ISG	IL	NOTEST	0	0	0	0	1	1	no
XLOC_001942	XLOC_001942	ISCW001385	DS640459:10177-21335	ISG	IL	OK	8.70944	23.4945	1.43167	-1.48496	0.137554	0.266939	no
XLOC_001943	XLOC_001943	ISCW001388	DS640459:44482-46843	ISG	IL	OK	1.25666	1916.79	10.5749	-9.21866	0	0	yes
XLOC_001944	XLOC_001944	ISCW001386	DS640459:10177-21335	ISG	IL	OK	74.9114	126.677	0.757901	-0.783402	0.433391	0.589069	no
XLOC_001945	XLOC_001945	ISCW001387	DS640459:23199-35634	ISG	IL	OK	54.5256	41.4138	-0.396822	0.390955	0.695831	0.804698	no
XLOC_001946	XLOC_001946	ISCW001373	DS640466:4528-4600	ISG	IL	NOTEST	0	0	0	0	1	1	no
XLOC_001947	XLOC_001947	ISCW001040	DS640514:33009-53057	ISG	IL	OK	15.3476	43.6056	1.5065	-1.49738	0.134295	0.2623	no
XLOC_001948	XLOC_001948	-	DS640514:189902-189975	ISG	IL	NOTEST	0	0	0	0	1	1	no
XLOC_001949	XLOC_001949	ISCW001046	DS640514:191217-204171	ISG	IL	NOTEST	0	1.37536	1.79769e+308	1.79769e+308	0.0216541	1	no
XLOC_001950	XLOC_001950	ISCW001037	DS640514:149-222	ISG	IL	NOTEST	0	0	0	0	1	1	no
XLOC_001951	XLOC_001951	ISCW001038	DS640514:4856-30439	ISG	IL	NOTEST	0	0	0	0	1	1	no
XLOC_001952	XLOC_001952	ISCW001041	DS640514:53408-55481	ISG	IL	OK	1.41891	1.79957	0.342863	-0.311163	0.755677	0.84497	no
XLOC_001953	XLOC_001953	ISCW001042	DS640514:58250-66375	ISG	IL	OK	1.64414	2.16244	0.395331	-0.395738	0.692299	0.802047	no
XLOC_001954	XLOC_001954	ISCW001043	DS640514:101437-128979	ISG	IL	OK	3.96786	3.90387	-0.0234588	0.0251129	0.979965	0.988932	no
XLOC_001955	XLOC_001955	ISCW001044	DS640514:172616-177977	ISG	IL	NOTEST	0	0	0	0	1	1	no
XLOC_001956	XLOC_001956	ISCW001047	DS640514:238105-241754	ISG	IL	OK	17.3943	36.7678	1.07983	-1.09836	0.272046	0.423926	no
XLOC_001957	XLOC_001957	ISCW001048	DS640514:267099-280420	ISG	IL	OK	2.9125	3.06156	0.0720095	-0.0772007	0.938464	0.963194	no
XLOC_001958	XLOC_001958	ISCW001493	DS640554:19152-31343	ISG	IL	NOTEST	0.129763	0	-1.79769e+308	-1.79769e+308	0.158655	1	no
XLOC_001959	XLOC_001959	ISCW001494	DS640554:59509-80254	ISG	IL	OK	1.99009	0.791836	-1.32956	1.35215	0.176326	0.307994	no
XLOC_001960	XLOC_001960	ISCW001582	DS640652:5544-5617	ISG	IL	NOTEST	0	0	0	0	1	1	no
XLOC_001961	XLOC_001961	ISCW001029	DS640700:4559-29809	ISG	IL	OK	6.71223	5.46509	-0.296547	0.314399	0.753218	0.844282	no
XLOC_001962	XLOC_001962	ISCW001031	DS640700:175658-213177	ISG	IL	OK	24.8701	7.85481	-1.66276	1.71967	0.0854924	0.187407	no
XLOC_001963	XLOC_001963	ISCW001033	DS640700:217351-218941	ISG	IL	OK	3.15093	0.666039	-2.2421	2.22299	0.0262167	0.0841532	no
XLOC_001964	XLOC_001964	ISCW001028	DS640700:2679-2752	ISG	IL	NOTEST	0	0	0	0	1	1	no
XLOC_001965	XLOC_001965	ISCW001030	DS640700:32377-40641	ISG	IL	OK	2.16467	1.09816	-0.979065	0.904178	0.365901	0.521371	no
XLOC_001966	XLOC_001966	ISCW000633	DS640702:9704-16449	ISG	IL	NOTEST	0	0	0	0	1	1	no
XLOC_001967	XLOC_001967	ISCW000354	DS640738:46035-60069	ISG	IL	OK	18.8591	10.1472	-0.894176	0.929838	0.352455	0.508338	no
XLOC_001968	XLOC_001968	ISCW000355	DS640738:63218-69611	ISG	IL	OK	25.2683	18.8213	-0.424963	0.451077	0.651934	0.774163	no
XLOC_001969	XLOC_001969	ISCW000356	DS640738:71281-75789	ISG	IL	OK	25.4956	29.5638	0.21358	-0.22715	0.820307	0.89075	no
XLOC_001970	XLOC_001970	-	DS640738:82418-82489	ISG	IL	NOTEST	0	0	0	0	1	1	no
XLOC_001971	XLOC_001971	-	DS640738:83020-83091	ISG	IL	NOTEST	0	0	0	0	1	1	no
XLOC_001972	XLOC_001972	-	DS640738:84075-84146	ISG	IL	NOTEST	0	0	0	0	1	1	no
XLOC_001973	XLOC_001973	-	DS640738:196436-196508	ISG	IL	NOTEST	0	0	0	0	1	1	no
XLOC_001974	XLOC_001974	ISCW000352	DS640738:7319-12462	ISG	IL	OK	39.8545	10.3287	-1.94808	2.01714	0.0436813	0.115354	no
XLOC_001975	XLOC_001975	ISCW000353	DS640738:16668-45460	ISG	IL	OK	10.1487	12.0452	0.247163	-0.253616	0.799792	0.877781	no
XLOC_001976	XLOC_001976	ISCW000357	DS640738:77879-78041	ISG	IL	NOTEST	0	0	0	0	1	1	no
XLOC_001977	XLOC_001977	ISCW000361	DS640738:123088-151836	ISG	IL	NOTEST	0	0	0	0	1	1	no
XLOC_001978	XLOC_001978	ISCW000362	DS640738:169492-179864	ISG	IL	NOTEST	0	0	0	0	1	1	no
XLOC_001979	XLOC_001979	ISCW000363	DS640738:181810-184050	ISG	IL	NOTEST	0	0	0	0	1	1	no
XLOC_001980	XLOC_001980	ISCW000365	DS640738:200262-205368	ISG	IL	NOTEST	0	0	0	0	1	1	no
XLOC_001981	XLOC_001981	ISCW000366	DS640738:220075-233849	ISG	IL	NOTEST	0	0	0	0	1	1	no
XLOC_001982	XLOC_001982	ISCW000367	DS640738:236093-236354	ISG	IL	OK	0	2.91088	1.79769e+308	1.79769e+308	0.158655	0.285968	no
XLOC_001983	XLOC_001983	ISCW001564	DS640764:139727-160277	ISG	IL	OK	17.0493	2.52897	-2.75309	2.8291	0.00466795	0.0315293	yes
XLOC_001984	XLOC_001984	ISCW001562	DS640764:3468-7058	ISG	IL	OK	1.73721	0.979224	-0.827062	0.84915	0.395798	0.55197	no
XLOC_001985	XLOC_001985	ISCW001563	DS640764:105535-122730	ISG	IL	OK	2.22811	6.27966	1.49487	-1.32306	0.185815	0.321435	no
XLOC_001986	XLOC_001986	ISCW001376	DS640832:574-10966	ISG	IL	NOTEST	0	0	0	0	1	1	no
XLOC_001987	XLOC_001987	ISCW024083	DS640973:3802-4042	ISG	IL	NOTEST	0	0	0	0	1	1	no
XLOC_001988	XLOC_001988	ISCW000904	DS641111:79877-162024	ISG	IL	OK	4.41076	0.432389	-3.35062	3.40786	0.000654754	0.00781412	yes
XLOC_001989	XLOC_001989	ISCW016385	DS641118:16254-45706	ISG	IL	OK	1.40139	27.0372	4.27001	-4.42499	9.64463e-06	0.000360307	yes
XLOC_001990	XLOC_001990	ISCW016387	DS641118:73165-94972	ISG	IL	NOTEST	0	0	0	0	1	1	no
XLOC_001991	XLOC_001991	ISCW016388	DS641118:121869-134890	ISG	IL	OK	0	5.59004	1.79769e+308	1.79769e+308	0.0154857	0.0668948	no
XLOC_001992	XLOC_001992	ISCW016389	DS641118:254242-257613	ISG	IL	OK	0.85757	108.038	6.97707	-5.65944	1.51871e-08	2.00208e-06	yes
XLOC_001993	XLOC_001993	ISCW016390	DS641118:392637-395312	ISG	IL	NOTEST	0	0	0	0	1	1	no
XLOC_001994	XLOC_001994	ISCW016391	DS641118:404359-410640	ISG	IL	NOTEST	0	0	0	0	1	1	no
XLOC_001995	XLOC_001995	ISCW016392	DS641118:422015-426934	ISG	IL	NOTEST	0	0	0	0	1	1	no
XLOC_001996	XLOC_001996	ISCW016393	DS641118:486578-512007	ISG	IL	NOTEST	0	0	0	0	1	1	no
XLOC_001997	XLOC_001997	-	DS641118:593678-593760	ISG	IL	NOTEST	0	0	0	0	1	1	no
XLOC_001998	XLOC_001998	ISCW016397	DS641118:798171-826774	ISG	IL	NOTEST	0.0888702	0.75141	3.07983	-1.88689	0.0591748	1	no
[truncated: 21,299 more rows]

## Sheet: genes status OK
test_id	gene_id	gene	locus	sample_1	sample_2	status	value_1	value_2	log2(fold_change)	test_stat	p_value	q_value	sISGnificant	functional meaning
XLOC_023277	XLOC_023277	ISCW024941	DS980982:1177-1453	ISG	IL	OK	1.4477	12.2405	3.07983	-1.88689	0.0591748	0.145545	no
XLOC_023019	XLOC_023019	ISCW024940	DS978198:4294-4486	ISG	IL	OK	416.582	147.848	-1.49449	1.57601	0.115022	0.234398	no
XLOC_023201	XLOC_023201	ISCW024939	DS980056:317-473	ISG	IL	OK	24.6175	0	-1.79769e+308	-1.79769e+308	0.0786496	0.175622	no
XLOC_023041	XLOC_023041	ISCW024932	DS978740:863-1091	ISG	IL	OK	16.2463	82.4188	2.34286	-2.31818	0.0204398	0.0730717	no
XLOC_022276	XLOC_022276	ISCW024926	DS965393:5255-8624	ISG	IL	OK	6.39461	0.853694	-2.90506	2.7357	0.00622473	0.0386317	yes	overexpressed in ISG
XLOC_022544	XLOC_022544	ISCW024922	DS969448:850-1313	ISG	IL	OK	98.6607	148.542	0.59032	-0.595124	0.551761	0.693745	no
XLOC_021735	XLOC_021735	ISCW024919	DS957209:1176-1383	ISG	IL	OK	134.747	84.6342	-0.670942	0.711618	0.476701	0.626695	no
XLOC_021184	XLOC_021184	ISCW024918	DS947996:47-578	ISG	IL	OK	1.3486	0	-1.79769e+308	-1.79769e+308	0.0227501	0.0762482	no
XLOC_022277	XLOC_022277	ISCW024915	DS965394:361-2069	ISG	IL	OK	22.2813	9.55226	-1.22192	1.29493	0.195343	0.333938	no
XLOC_020743	XLOC_020743	ISCW024912	DS940819:321-1139	ISG	IL	OK	42.6604	69.2893	0.699735	-0.738236	0.460371	0.61158	no
XLOC_021780	XLOC_021780	ISCW024911	DS958397:286-745	ISG	IL	OK	1.30174	0	-1.79769e+308	-1.79769e+308	0.0416323	0.11081	no
XLOC_022140	XLOC_022140	ISCW024910	DS963726:824-2666	ISG	IL	OK	1.3991	2.59124	0.889145	-0.950177	0.342022	0.497302	no
XLOC_021899	XLOC_021899	ISCW024909	DS961059:7-837	ISG	IL	OK	24.3967	10.7711	-1.17952	1.25107	0.210907	0.350666	no
XLOC_021955	XLOC_021955	ISCW024908	DS961731:862-1765	ISG	IL	OK	0.156655	1.85435	3.56526	-2.21488	0.0267686	0.0850677	no
XLOC_021755	XLOC_021755	ISCW024906	DS957601:705-975	ISG	IL	OK	1.54816	7.85393	2.34286	-1.40638	0.159611	0.286117	no
XLOC_022012	XLOC_022012	ISCW024905	DS962330:498-1515	ISG	IL	OK	16.1491	17.523	0.117797	-0.122744	0.90231	0.940354	no
XLOC_021226	XLOC_021226	ISCW024901	DS948316:75-943	ISG	IL	OK	6.29076	2.89242	-1.12096	1.08047	0.279933	0.433565	no
XLOC_022632	XLOC_022632	ISCW024899	DS970886:4732-5116	ISG	IL	OK	4.94634	85.7351	4.11545	-4.24253	2.21017e-05	0.000677601	yes	overexpressed in IL
XLOC_021865	XLOC_021865	ISCW024898	DS959972:41-838	ISG	IL	OK	39.6339	20.5335	-0.94876	0.99964	0.317485	0.474242	no
XLOC_020356	XLOC_020356	ISCW024896	DS933179:246-1439	ISG	IL	OK	0	12.1337	1.79769e+308	1.79769e+308	0.0311492	0.0919591	no
XLOC_020338	XLOC_020338	ISCW024894	DS932732:483-1047	ISG	IL	OK	1.24903	1.16383	-0.101921	0.0676672	0.946051	0.967673	no
XLOC_020479	XLOC_020479	ISCW024893	DS935758:102-1328	ISG	IL	OK	0	48.8336	1.79769e+308	1.79769e+308	0.0167301	0.0678946	no
XLOC_021077	XLOC_021077	ISCW024891	DS946349:94-820	ISG	IL	OK	1.37837	1.39851	0.0209353	-0.0185292	0.985217	0.989877	no
XLOC_020650	XLOC_020650	ISCW024890	DS939555:204-1178	ISG	IL	OK	18.0403	4.99201	-1.85353	1.92421	0.0543284	0.136793	no
XLOC_021686	XLOC_021686	ISCW024889	DS956407:486-1671	ISG	IL	OK	179.972	112.315	-0.68022	0.695738	0.486593	0.63491	no
XLOC_020879	XLOC_020879	ISCW024888	DS942822:0-617	ISG	IL	OK	20.0753	0	-1.79769e+308	-1.79769e+308	0.0162619	0.0672943	no
XLOC_022180	XLOC_022180	ISCW024886	DS964497:558-801	ISG	IL	OK	2.17429	69.8588	5.00583	-3.15366	0.00161239	0.0147747	yes	overexpressed in IL
XLOC_021270	XLOC_021270	ISCW024884	DS948943:968-1376	ISG	IL	OK	7.09006	3.68317	-0.944849	0.957097	0.338518	0.493764	no
XLOC_020732	XLOC_020732	ISCW024882	DS940542:192-1177	ISG	IL	OK	0	3.3123	1.79769e+308	1.79769e+308	0.0293909	0.0878738	no
XLOC_021113	XLOC_021113	ISCW024880	DS947085:807-1497	ISG	IL	OK	15.5872	13.7522	-0.180699	0.192629	0.84725	0.908481	no
XLOC_021690	XLOC_021690	ISCW024879	DS956565:1297-1456	ISG	IL	OK	418.338	152.956	-1.45155	1.51243	0.130426	0.257019	no
XLOC_020518	XLOC_020518	ISCW024878	DS936630:884-1115	ISG	IL	OK	0	4.37362	1.79769e+308	1.79769e+308	0.158655	0.285968	no
XLOC_020784	XLOC_020784	ISCW024874	DS941546:946-1324	ISG	IL	OK	121.575	28.1436	-2.11097	2.19953	0.0278404	0.0875409	no
XLOC_021829	XLOC_021829	ISCW024872	DS959409:639-1063	ISG	IL	OK	3.03113	2.56287	-0.242099	0.193771	0.846355	0.907957	no
XLOC_020609	XLOC_020609	ISCW024869	DS938846:59-955	ISG	IL	OK	12.1496	24.214	0.99494	-1.06996	0.284635	0.438716	no
XLOC_021479	XLOC_021479	ISCW024867	DS952961:63-807	ISG	IL	OK	39.0022	5.49616	-2.82706	2.92396	0.00345611	0.025573	yes	overexpressed in ISG
XLOC_022181	XLOC_022181	ISCW024859	DS964510:1236-4730	ISG	IL	OK	0.387566	12.4523	5.00583	-3.15366	0.00161239	0.0147747	yes	overexpressed in IL
XLOC_020365	XLOC_020365	ISCW024849	DS933364:502-1222	ISG	IL	OK	12.3343	17.2616	0.484882	-0.517546	0.604775	0.737263	no
XLOC_020520	XLOC_020520	ISCW024846	DS936714:473-1013	ISG	IL	OK	115.13	62.6774	-0.877247	0.887438	0.374843	0.530816	no
XLOC_022376	XLOC_022376	ISCW024840	DS967504:4525-5719	ISG	IL	OK	0	1.97603	1.79769e+308	1.79769e+308	0.158655	0.285968	no
XLOC_021112	XLOC_021112	ISCW024838	DS946973:3572-4821	ISG	IL	OK	1.76304	13.4161	2.92783	-2.36785	0.0178916	0.0693894	no
XLOC_021469	XLOC_021469	ISCW024837	DS952715:154-1024	ISG	IL	OK	19.7358	11.6809	-0.756672	0.794953	0.426641	0.581686	no
XLOC_021480	XLOC_021480	ISCW024830	DS952962:159-1376	ISG	IL	OK	141.395	217.363	0.620373	-0.640672	0.521736	0.667238	no
XLOC_022385	XLOC_022385	ISCW024828	DS967584:3734-3890	ISG	IL	OK	713.908	1852.49	1.37565	-1.4521	0.146473	0.280779	no
XLOC_022147	XLOC_022147	ISCW024827	DS963792:1174-1399	ISG	IL	OK	11.3508	4.79864	-1.2421	0.770064	0.441262	0.594623	no
XLOC_018920	XLOC_018920	ISCW024821	DS911188:297-924	ISG	IL	OK	7.53646	0	-1.79769e+308	-1.79769e+308	0.0141828	0.066059	no
XLOC_018022	XLOC_018022	ISCW024817	DS897046:15-2012	ISG	IL	OK	0	100.787	1.79769e+308	1.79769e+308	0.018328	0.070178	no
XLOC_018324	XLOC_018324	ISCW024816	DS902321:549-1358	ISG	IL	OK	26.0354	8.00485	-1.70153	1.38693	0.165464	0.293308	no
XLOC_018845	XLOC_018845	ISCW024807	DS910088:1002-3947	ISG	IL	OK	0	2.71017	1.79769e+308	1.79769e+308	0.158655	0.285968	no
XLOC_017715	XLOC_017715	ISCW024803	DS892686:165-765	ISG	IL	OK	2987.01	7325.6	1.29425	-1.03186	0.302138	0.458666	no
XLOC_017859	XLOC_017859	ISCW024802	DS894869:4533-5569	ISG	IL	OK	2.25319	33.6599	3.90099	-3.86876	0.000109389	0.00219333	yes	overexpressed in IL
XLOC_018464	XLOC_018464	ISCW024800	DS903897:2045-4449	ISG	IL	OK	113.724	347.99	1.61351	-1.71469	0.0864013	0.189097	no
XLOC_018335	XLOC_018335	ISCW024799	DS902619:6735-9137	ISG	IL	OK	3.90666	0.574458	-2.76566	2.27535	0.0228852	0.0764775	no
XLOC_019509	XLOC_019509	ISCW024797	DS921296:3-438	ISG	IL	OK	9.11648	2.43414	-1.90506	1.79057	0.0733621	0.171258	no
XLOC_017987	XLOC_017987	ISCW024796	DS896754:580-8601	ISG	IL	OK	113.534	40.7574	-1.47799	1.48136	0.13851	0.268566	no
XLOC_020270	XLOC_020270	ISCW024795	DS931697:105-1604	ISG	IL	OK	1.15768	0	-1.79769e+308	-1.79769e+308	0.0278626	0.0875409	no
XLOC_019835	XLOC_019835	ISCW024794	DS925205:241-755	ISG	IL	OK	520.388	131.136	-1.98853	2.01395	0.0440143	0.116099	no
XLOC_019737	XLOC_019737	ISCW024792	DS923942:1520-1904	ISG	IL	OK	4.32805	0	-1.79769e+308	-1.79769e+308	0.0216541	0.0754501	no
XLOC_018385	XLOC_018385	ISCW024788	DS903483:392-863	ISG	IL	OK	1.65642	0	-1.79769e+308	-1.79769e+308	0.0227501	0.0762482	no
XLOC_018849	XLOC_018849	ISCW024787	DS910190:317-1776	ISG	IL	OK	6988.27	6749.81	-0.0500878	0.0397959	0.968256	0.980797	no
XLOC_018065	XLOC_018065	ISCW024783	DS898398:4263-8683	ISG	IL	OK	2728.48	2348.9	-0.216112	0.177845	0.858845	0.915946	no
XLOC_017830	XLOC_017830	ISCW024782	DS894095:120-1018	ISG	IL	OK	0	3.52887	1.79769e+308	1.79769e+308	0.158655	0.285968	no
XLOC_020032	XLOC_020032	ISCW024779	DS928254:855-1368	ISG	IL	OK	1.1158	3.62274	1.69901	-1.42044	0.15548	0.285968	no
XLOC_019932	XLOC_019932	ISCW024778	DS926339:680-4949	ISG	IL	OK	1.27973	0	-1.79769e+308	-1.79769e+308	0.0786496	0.175622	no
XLOC_018511	XLOC_018511	ISCW024772	DS904650:1532-6147	ISG	IL	OK	20.2431	7.31162	-1.46917	1.55042	0.12104	0.242651	no
XLOC_018368	XLOC_018368	ISCW024769	DS903191:297-1389	ISG	IL	OK	0	47.7419	1.79769e+308	1.79769e+308	0.0141975	0.066059	no
XLOC_020250	XLOC_020250	ISCW024762	DS930938:1060-1216	ISG	IL	OK	36.9263	20.8145	-0.827062	0.496471	0.619562	0.747603	no
XLOC_020297	XLOC_020297	ISCW024761	DS931820:181-334	ISG	IL	OK	15600.8	47832	1.61635	-1.49377	0.135237	0.263557	no
XLOC_020254	XLOC_020254	ISCW024759	DS931280:473-2013	ISG	IL	OK	1.61091	8.17226	2.34286	-2.30173	0.0213503	0.0754501	no
XLOC_018047	XLOC_018047	ISCW024757	DS897895:3603-7465	ISG	IL	OK	27.2187	0	-1.79769e+308	-1.79769e+308	0.014471	0.066059	no
XLOC_018181	XLOC_018181	ISCW024754	DS900031:113-410	ISG	IL	OK	4.77152	0.988014	-2.27185	0.75941	0.447607	0.59986	no
XLOC_019317	XLOC_019317	ISCW024753	DS918397:1587-1944	ISG	IL	OK	2.9127	1.23137	-1.2421	0.770064	0.441262	0.594623	no
XLOC_019907	XLOC_019907	ISCW024752	DS926224:136-391	ISG	IL	OK	9.27293	9.40847	0.0209353	-0.0185292	0.985217	0.989877	no
XLOC_018959	XLOC_018959	ISCW024751	DS911566:15-1384	ISG	IL	OK	4.04376	16.1222	1.99528	-2.11466	0.0344587	0.0994731	no
XLOC_018146	XLOC_018146	ISCW024750	DS899374:1103-1370	ISG	IL	OK	1.60268	0	-1.79769e+308	-1.79769e+308	0.158655	0.285968	no
XLOC_018245	XLOC_018245	ISCW024747	DS901296:1278-1665	ISG	IL	OK	26.1451	25.7047	-0.0245077	0.0262968	0.979021	0.98824	no
XLOC_020033	XLOC_020033	ISCW024745	DS928283:130-2995	ISG	IL	OK	6.61345	12.3818	0.904742	-0.972279	0.330912	0.487005	no
XLOC_019328	XLOC_019328	ISCW024743	DS918688:85-394	ISG	IL	OK	4.18924	3.54206	-0.242099	0.193771	0.846355	0.907957	no
XLOC_019639	XLOC_019639	ISCW024735	DS922387:4148-4429	ISG	IL	OK	4.73372	4.00243	-0.242099	0.137017	0.891018	0.93453	no
XLOC_019800	XLOC_019800	ISCW024733	DS924717:129-1863	ISG	IL	OK	0	5.76324	1.79769e+308	1.79769e+308	0.0416323	0.11081	no
XLOC_017966	XLOC_017966	ISCW024731	DS896485:339-5405	ISG	IL	OK	5.1594	54.6441	3.40479	-3.57211	0.000354123	0.00497725	yes	overexpressed in IL
XLOC_018512	XLOC_018512	ISCW024730	DS904659:678-1275	ISG	IL	OK	2.23941	0.473364	-2.2421	1.3988	0.161872	0.288278	no
XLOC_019524	XLOC_019524	ISCW024727	DS921462:247-1089	ISG	IL	OK	11.3252	9.07162	-0.320102	0.342383	0.732063	0.829504	no
XLOC_018905	XLOC_018905	ISCW024725	DS910946:72-1853	ISG	IL	OK	3.03618	10.0852	1.73191	-1.85424	0.0637047	0.1543	no
XLOC_019829	XLOC_019829	ISCW024724	DS925027:779-1790	ISG	IL	OK	27.5231	1.37564	-4.32247	4.18323	2.87392e-05	0.00081002	yes	overexpressed in ISG
XLOC_016599	XLOC_016599	ISCW024722	DS873579:48-672	ISG	IL	OK	10.7319	5.31157	-1.01469	1.07129	0.28404	0.437974	no
XLOC_015923	XLOC_015923	ISCW024721	DS862196:336-762	ISG	IL	OK	1.49887	0	-1.79769e+308	-1.79769e+308	0.0416323	0.11081	no
XLOC_016134	XLOC_016134	ISCW024720	DS865836:525-1060	ISG	IL	OK	12.9901	7.88413	-0.72039	0.763496	0.445168	0.598199	no
XLOC_016124	XLOC_016124	ISCW024717	DS865635:781-1297	ISG	IL	OK	38.5398	122.571	1.6692	-1.70699	0.0878244	0.190624	no
XLOC_017527	XLOC_017527	ISCW024716	DS890124:787-1051	ISG	IL	OK	0	2.33973	1.79769e+308	1.79769e+308	0.202328	0.34239	no
XLOC_016286	XLOC_016286	ISCW024713	DS868224:50-275	ISG	IL	OK	0	4.79864	1.79769e+308	1.79769e+308	0.158655	0.285968	no
XLOC_015974	XLOC_015974	ISCW024711	DS863085:156-1292	ISG	IL	OK	1.67108	0	-1.79769e+308	-1.79769e+308	0.130295	0.256937	no
XLOC_016947	XLOC_016947	ISCW024709	DS881259:348-1007	ISG	IL	OK	9.69673	13.4161	0.468394	-0.479891	0.631305	0.756576	no
XLOC_015441	XLOC_015441	ISCW024708	DS854942:46-3274	ISG	IL	OK	4.9247	0	-1.79769e+308	-1.79769e+308	0.0151195	0.0668948	no
XLOC_016804	XLOC_016804	ISCW024706	DS878134:200-1211	ISG	IL	OK	119.99	49.9815	-1.26345	1.23675	0.216181	0.357826	no
XLOC_015725	XLOC_015725	ISCW024704	DS859443:1650-3011	ISG	IL	OK	2.00194	1.04164	-0.942539	0.954044	0.340061	0.49514	no
XLOC_015350	XLOC_015350	ISCW024703	DS853466:874-1537	ISG	IL	OK	12.2048	18.2106	0.577329	-0.617712	0.536765	0.681217	no
XLOC_015217	XLOC_015217	ISCW024702	DS851942:1271-2875	ISG	IL	OK	8.97937	15.1844	0.757901	-0.704813	0.480926	0.629723	no
XLOC_015897	XLOC_015897	ISCW024700	DS861731:3984-4353	ISG	IL	OK	4.72552	12.5573	1.40998	-1.42855	0.153132	0.285968	no
XLOC_017210	XLOC_017210	ISCW024699	DS886097:23-1794	ISG	IL	OK	0.340311	2.3019	2.7579	-1.70981	0.0873001	0.189702	no
XLOC_016372	XLOC_016372	ISCW024697	DS869796:233-1141	ISG	IL	OK	47.9968	3.95089	-3.60269	3.5453	0.000392159	0.00538651	yes	overexpressed in ISG
XLOC_016439	XLOC_016439	ISCW024694	DS870657:149-680	ISG	IL	OK	234.993	106.615	-1.14021	1.12554	0.260359	0.411416	no
XLOC_016865	XLOC_016865	ISCW024691	DS879326:1939-5245	ISG	IL	OK	3.39165	0	-1.79769e+308	-1.79769e+308	0.0167792	0.0678946	no
XLOC_017138	XLOC_017138	ISCW024690	DS885473:294-525	ISG	IL	OK	0	4.37362	1.79769e+308	1.79769e+308	0.158655	0.285968	no
XLOC_015958	XLOC_015958	ISCW024687	DS862715:646-1024	ISG	IL	OK	1.91959	1.08203	-0.827062	0.496471	0.619562	0.747603	no
XLOC_016567	XLOC_016567	ISCW024685	DS873045:2158-2362	ISG	IL	OK	24.409	247.658	3.34286	-3.32335	0.000889427	0.00978967	yes	overexpressed in IL
XLOC_015229	XLOC_015229	ISCW024681	DS852082:233-1129	ISG	IL	OK	0	4.73943	1.79769e+308	1.79769e+308	0.0227501	0.0762482	no
XLOC_017523	XLOC_017523	ISCW024680	DS889939:683-1093	ISG	IL	OK	111.106	3.83436	-4.85681	3.06002	0.0022132	0.018673	yes	overexpressed in ISG
XLOC_016326	XLOC_016326	ISCW024679	DS868908:311-488	ISG	IL	OK	71.4342	72.4783	0.0209353	-0.0203642	0.983753	0.989877	no
XLOC_016499	XLOC_016499	ISCW024677	DS871559:838-2609	ISG	IL	OK	4.14419	7.32649	0.822031	-0.880769	0.378443	0.534659	no
XLOC_015920	XLOC_015920	ISCW024674	DS862023:153-495	ISG	IL	OK	0	8.25253	1.79769e+308	1.79769e+308	0.0278626	0.0875409	no
XLOC_015502	XLOC_015502	ISCW024673	DS856173:663-3397	ISG	IL	OK	13.1805	19.6352	0.575037	-0.616969	0.537255	0.681538	no
XLOC_016666	XLOC_016666	ISCW024672	DS875275:686-1545	ISG	IL	OK	50.1426	30.8337	-0.701531	0.746508	0.455361	0.607288	no
XLOC_016273	XLOC_016273	ISCW024669	DS867945:498-1899	ISG	IL	OK	1.36881	0	-1.79769e+308	-1.79769e+308	0.0160623	0.0672943	no
XLOC_016917	XLOC_016917	ISCW024663	DS880336:197-2235	ISG	IL	OK	3.44718	3.15752	-0.126622	0.134272	0.893188	0.935505	no
XLOC_015418	XLOC_015418	ISCW024662	DS854597:232-1330	ISG	IL	OK	75.5214	55.8726	-0.434744	0.445038	0.656293	0.777987	no
XLOC_015392	XLOC_015392	ISCW024660	DS853840:132-1627	ISG	IL	OK	31.1092	20.2606	-0.618662	0.645345	0.518704	0.66514	no
XLOC_017449	XLOC_017449	ISCW024659	DS888631:202-803	ISG	IL	OK	93.1579	41.0016	-1.184	1.25746	0.208585	0.347865	no
XLOC_016803	XLOC_016803	ISCW024657	DS878122:1000-1405	ISG	IL	OK	30.4875	14.0605	-1.11657	1.164	0.244426	0.393503	no
XLOC_017032	XLOC_017032	ISCW024656	DS883119:252-723	ISG	IL	OK	8.28754	10.5039	0.341915	-0.362472	0.717	0.817422	no
XLOC_016875	XLOC_016875	ISCW024654	DS879637:1068-3225	ISG	IL	OK	1.66759	0.201425	-3.04945	1.91415	0.0556006	0.138936	no
XLOC_016013	XLOC_016013	ISCW024653	DS863408:1058-1394	ISG	IL	OK	4.26548	21.3974	2.32666	-2.30297	0.0212808	0.0753765	no
XLOC_016324	XLOC_016324	ISCW024652	DS868822:750-951	ISG	IL	OK	0	7.2791	1.79769e+308	1.79769e+308	0.158655	0.285968	no
XLOC_015645	XLOC_015645	ISCW024651	DS857872:266-872	ISG	IL	OK	6.64135	11.2307	0.757901	-0.742939	0.457519	0.608522	no
XLOC_016409	XLOC_016409	ISCW024647	DS870286:1587-2587	ISG	IL	OK	3.7734	0	-1.79769e+308	-1.79769e+308	0.0288898	0.0878738	no
XLOC_016981	XLOC_016981	ISCW024645	DS882306:710-1055	ISG	IL	OK	22.9019	2.67088	-3.10008	2.55362	0.0106611	0.0570416	no
XLOC_017048	XLOC_017048	ISCW024642	DS883601:540-1353	ISG	IL	OK	1.85336	0.881463	-1.07217	0.734235	0.462805	0.61349	no
XLOC_016800	XLOC_016800	ISCW024641	DS877971:306-1017	ISG	IL	OK	10.8234	2.57762	-2.07004	2.13323	0.0329055	0.0957122	no
XLOC_017456	XLOC_017456	ISCW024640	DS888773:1139-1316	ISG	IL	OK	107.279	338.344	1.65713	-1.76186	0.0780935	0.175622	no
XLOC_015731	XLOC_015731	ISCW024638	DS859504:1719-1983	ISG	IL	OK	1.66034	0	-1.79769e+308	-1.79769e+308	0.158655	0.285968	no
XLOC_016665	XLOC_016665	ISCW024637	DS875259:728-1316	ISG	IL	OK	7.73985	6.79343	-0.188165	0.199562	0.841823	0.90622	no
XLOC_016946	XLOC_016946	ISCW024636	DS881149:681-984	ISG	IL	OK	15.4709	1.8687	-3.04945	1.91415	0.0556006	0.138936	no
XLOC_016568	XLOC_016568	ISCW024635	DS873307:462-4017	ISG	IL	OK	3.179	0	-1.79769e+308	-1.79769e+308	0.0154857	0.0668948	no
XLOC_015599	XLOC_015599	ISCW024632	DS857405:0-2221	ISG	IL	OK	5.83585	35.7586	2.61528	-2.77356	0.00554473	0.0354474	yes	overexpressed in IL
XLOC_017017	XLOC_017017	ISCW024631	DS882742:878-1712	ISG	IL	OK	2.32926	10.8318	2.21733	-2.30902	0.0209422	0.0745457	no
XLOC_015484	XLOC_015484	ISCW024627	DS855806:37-1352	ISG	IL	OK	2.16809	11.8136	2.44596	-2.54825	0.0108264	0.0574322	no
XLOC_016538	XLOC_016538	ISCW024626	DS872188:526-784	ISG	IL	OK	5.35808	6.04044	0.172938	-0.131313	0.895528	0.935505	no
XLOC_015704	XLOC_015704	ISCW024624	DS859075:4304-4829	ISG	IL	OK	25.91	63.2877	1.28842	-1.36582	0.171995	0.302178	no
XLOC_017074	XLOC_017074	ISCW024621	DS884313:873-1486	ISG	IL	OK	0.721207	25.6112	5.15022	-4.23908	2.24436e-05	0.000677665	yes	overexpressed in IL
XLOC_013746	XLOC_013746	ISCW024620	DS829569:4-880	ISG	IL	OK	9.12806	13.7809	0.594285	-0.634273	0.525902	0.670398	no
XLOC_013760	XLOC_013760	ISCW024619	DS829867:708-1062	ISG	IL	OK	178.038	41.8876	-2.08759	2.18139	0.0291548	0.0878738	no
XLOC_014492	XLOC_014492	ISCW024618	DS840665:109-370	ISG	IL	OK	12.1213	5.82177	-1.05802	0.85136	0.394569	0.550793	no
XLOC_012712	XLOC_012712	ISCW024616	DS814155:1026-1224	ISG	IL	OK	13619.1	21395.1	0.651655	-0.582065	0.560523	0.701128	no
XLOC_013539	XLOC_013539	ISCW024612	DS826328:1787-2330	ISG	IL	OK	1.64565	0	-1.79769e+308	-1.79769e+308	0.0278455	0.0875409	no
XLOC_014975	XLOC_014975	ISCW024611	DS848143:441-915	ISG	IL	OK	0	40.012	1.79769e+308	1.79769e+308	0.0142954	0.066059	no
XLOC_012770	XLOC_012770	ISCW024608	DS815297:553-1147	ISG	IL	OK	7.89889	144.544	4.19372	-4.33394	1.46465e-05	0.000502395	yes	overexpressed in IL
XLOC_013593	XLOC_013593	ISCW024604	DS827275:514-1693	ISG	IL	OK	4.03634	0.568797	-2.82706	2.66253	0.00775554	0.0454061	yes	overexpressed in ISG
XLOC_013345	XLOC_013345	ISCW024600	DS823999:1182-1440	ISG	IL	OK	1.78603	6.04044	1.7579	-0.994888	0.319791	0.475234	no
XLOC_015021	XLOC_015021	ISCW024598	DS848959:1854-7562	ISG	IL	OK	14.3766	16.5523	0.203312	-0.218075	0.827371	0.896466	no
XLOC_013256	XLOC_013256	ISCW024594	DS822484:1006-3843	ISG	IL	OK	18.0646	0	-1.79769e+308	-1.79769e+308	0.0142299	0.066059	no
XLOC_013749	XLOC_013749	ISCW024593	DS829734:615-1509	ISG	IL	OK	3.17421	0	-1.79769e+308	-1.79769e+308	0.0145482	0.066059	no
XLOC_013998	XLOC_013998	ISCW024589	DS833721:86-501	ISG	IL	OK	13.5986	21.3579	0.651315	-0.682913	0.494662	0.643478	no
XLOC_014616	XLOC_014616	ISCW024586	DS842982:1008-5719	ISG	IL	OK	23.0788	164.471	2.83319	-2.98197	0.00286398	0.0224518	yes	overexpressed in IL
XLOC_014351	XLOC_014351	ISCW024585	DS838324:450-1593	ISG	IL	OK	2.09589	3.5442	0.757901	-0.804954	0.420846	0.577148	no
XLOC_013780	XLOC_013780	ISCW024583	DS830468:8-608	ISG	IL	OK	0	3.30775	1.79769e+308	1.79769e+308	0.0210387	0.0747731	no
XLOC_013487	XLOC_013487	ISCW024581	DS825868:475-7558	ISG	IL	OK	76.7707	28.0501	-1.45255	1.48159	0.13845	0.268495	no
XLOC_014098	XLOC_014098	ISCW024573	DS835164:857-1235	ISG	IL	OK	9.59796	2.16406	-2.14899	1.75819	0.0787159	0.175622	no
XLOC_014097	XLOC_014097	ISCW024572	DS835164:302-749	ISG	IL	OK	4.55711	0	-1.79769e+308	-1.79769e+308	0.0185281	0.070178	no
XLOC_012969	XLOC_012969	ISCW024570	DS818030:5-599	ISG	IL	OK	0.634732	4.30831	2.7629	-1.89338	0.0583072	0.144371	no
XLOC_014371	XLOC_014371	ISCW024567	DS838835:345-1263	ISG	IL	OK	3.68027	0.77793	-2.2421	2.11161	0.0347197	0.0999248	no
XLOC_012878	XLOC_012878	ISCW024566	DS816494:4413-5025	ISG	IL	OK	0	4.10205	1.79769e+308	1.79769e+308	0.0194737	0.0705669	no
XLOC_014846	XLOC_014846	ISCW024564	DS846512:470-1044	ISG	IL	OK	74.3931	29.1806	-1.35016	1.40475	0.160097	0.286854	no
XLOC_014128	XLOC_014128	ISCW024560	DS835788:912-1455	ISG	IL	OK	0.650135	4.39759	2.7579	-2.23072	0.0256996	0.0833567	no
XLOC_013072	XLOC_013072	ISCW024559	DS819748:400-9326	ISG	IL	OK	1.15824	0	-1.79769e+308	-1.79769e+308	0.0786496	0.175622	no
XLOC_015033	XLOC_015033	ISCW024558	DS849306:365-1836	ISG	IL	OK	247.038	17.9647	-3.7815	3.856	0.000115259	0.00227132	yes	overexpressed in ISG
XLOC_014415	XLOC_014415	ISCW024556	DS839512:347-8884	ISG	IL	OK	84.8844	31.1457	-1.44647	1.50173	0.133167	0.260812	no
XLOC_014241	XLOC_014241	ISCW024552	DS837338:378-1750	ISG	IL	OK	39.175	5.96214	-2.71603	2.78586	0.00533854	0.0347268	yes	overexpressed in ISG
XLOC_014103	XLOC_014103	ISCW024551	DS835288:557-858	ISG	IL	OK	3.84992	0	-1.79769e+308	-1.79769e+308	0.158655	0.285968	no
XLOC_014432	XLOC_014432	ISCW024550	DS839904:279-480	ISG	IL	OK	4.30454	167.419	5.28146	-3.32826	0.000873896	0.00966315	yes	overexpressed in IL
XLOC_013768	XLOC_013768	ISCW024549	DS830057:999-1252	ISG	IL	OK	45.6625	54.7454	0.261727	-0.279109	0.780161	0.863508	no
XLOC_014245	XLOC_014245	ISCW024547	DS837468:415-802	ISG	IL	OK	80.2593	61.6913	-0.379603	0.396535	0.691711	0.802047	no
XLOC_013384	XLOC_013384	ISCW024544	DS824836:1343-5569	ISG	IL	OK	222.514	148.391	-0.584491	0.577995	0.563267	0.70318	no
XLOC_013009	XLOC_013009	ISCW024543	DS818428:1305-6196	ISG	IL	OK	7.36977	24.925	1.7579	-1.87727	0.0604815	0.148124	no
XLOC_013720	XLOC_013720	ISCW024542	DS829353:1632-5106	ISG	IL	OK	151.511	13.8153	-3.45509	3.53719	0.000404415	0.00547701	yes	overexpressed in ISG
XLOC_014091	XLOC_014091	ISCW024541	DS835091:371-961	ISG	IL	OK	5.75878	66.0037	3.51871	-3.64851	0.000263765	0.00405512	yes	overexpressed in IL
XLOC_014605	XLOC_014605	ISCW024539	DS842820:978-1236	ISG	IL	OK	5.35808	0	-1.79769e+308	-1.79769e+308	0.0416323	0.11081	no
XLOC_014637	XLOC_014637	ISCW024537	DS843171:311-509	ISG	IL	OK	2.28049	3.85637	0.757901	-0.185735	0.852653	0.912205	no
XLOC_013759	XLOC_013759	ISCW024536	DS829863:1056-1791	ISG	IL	OK	0.464865	3.49378	2.9099	-1.997	0.0458253	0.11972	no
XLOC_015166	XLOC_015166	ISCW024535	DS851371:322-1047	ISG	IL	OK	1.76788	2.98953	0.757901	-0.702011	0.482672	0.631344	no
XLOC_012635	XLOC_012635	ISCW024534	DS812826:1187-1400	ISG	IL	OK	0	13.1692	1.79769e+308	1.79769e+308	0.130295	0.256937	no
XLOC_015176	XLOC_015176	ISCW024529	DS851548:33-982	ISG	IL	OK	17101.2	7193.64	-1.2493	0.997355	0.318592	0.475234	no
XLOC_012662	XLOC_012662	ISCW024528	DS813472:45-998	ISG	IL	OK	0	4.73956	1.79769e+308	1.79769e+308	0.0786496	0.175622	no
XLOC_013635	XLOC_013635	ISCW024525	DS827783:815-1070	ISG	IL	OK	9.27293	9.40847	0.0209353	-0.0185292	0.985217	0.989877	no
XLOC_014064	XLOC_014064	ISCW024524	DS834821:308-4347	ISG	IL	OK	900.145	316.195	-1.50934	1.44448	0.148604	0.284198	no
XLOC_014610	XLOC_014610	ISCW024521	DS842913:2340-5740	ISG	IL	OK	3.33963	13.7797	2.04478	-2.18619	0.0288015	0.0878738	no
XLOC_012698	XLOC_012698	ISCW024516	DS813902:1092-1989	ISG	IL	OK	8.84907	6.94759	-0.349014	0.37329	0.708933	0.812031	no
XLOC_011942	XLOC_011942	ISCW024514	DS800412:9-492	ISG	IL	OK	1.18808	0	-1.79769e+308	-1.79769e+308	0.0416323	0.11081	no
XLOC_012344	XLOC_012344	ISCW024508	DS808484:435-1811	ISG	IL	OK	0.850645	3.95578	2.21733	-2.2344	0.0254567	0.0830619	no
XLOC_010603	XLOC_010603	ISCW024507	DS777186:5-452	ISG	IL	OK	20.5096	23.1253	0.173171	-0.185882	0.852537	0.912205	no
XLOC_010936	XLOC_010936	ISCW024504	DS782808:1232-1517	ISG	IL	OK	1.31575	0	-1.79769e+308	-1.79769e+308	0.158655	0.285968	no
XLOC_010714	XLOC_010714	ISCW024501	DS778509:4543-4768	ISG	IL	OK	2.8377	0	-1.79769e+308	-1.79769e+308	0.158655	0.285968	no
XLOC_012244	XLOC_012244	ISCW024498	DS807243:1341-2346	ISG	IL	OK	7.2759	0.424267	-4.10008	2.58565	0.00971969	0.0533119	no
XLOC_010549	XLOC_010549	ISCW024497	DS776137:545-1967	ISG	IL	OK	10966.7	5383.89	-1.02641	0.824232	0.409808	0.566275	no
XLOC_010346	XLOC_010346	ISCW024495	DS772596:606-1143	ISG	IL	OK	20.5219	10.0833	-1.02519	1.08983	0.27579	0.428479	no
XLOC_010935	XLOC_010935	ISCW024492	DS782775:239-768	ISG	IL	OK	1713.31	2499.23	0.544698	-0.543546	0.586754	0.723169	no
XLOC_010540	XLOC_010540	ISCW024488	DS775809:279-3682	ISG	IL	OK	3.2135	0	-1.79769e+308	-1.79769e+308	0.0194737	0.0705669	no
XLOC_011946	XLOC_011946	ISCW024487	DS800461:340-3343	ISG	IL	OK	18.5676	5.02373	-1.88596	1.93163	0.0534051	0.135032	no
XLOC_010457	XLOC_010457	ISCW024485	DS774993:3563-5547	ISG	IL	OK	62.0186	38.0501	-0.7048	0.744471	0.456592	0.608177	no
XLOC_011179	XLOC_011179	ISCW024483	DS787195:467-878	ISG	IL	OK	6.43789	0	-1.79769e+308	-1.79769e+308	0.0169474	0.0678946	no
XLOC_011838	XLOC_011838	ISCW024482	DS798580:315-913	ISG	IL	OK	1.40236	3.95238	1.49487	-1.32306	0.185815	0.321435	no
XLOC_011238	XLOC_011238	ISCW024481	DS787993:920-1510	ISG	IL	OK	25.4215	4.06647	-2.6442	2.70068	0.00691977	0.041773	yes	overexpressed in ISG
XLOC_011929	XLOC_011929	ISCW024479	DS800202:0-392	ISG	IL	OK	35.2179	8.37318	-2.07246	2.07046	0.0384089	0.107483	no
XLOC_011440	XLOC_011440	ISCW024475	DS791611:993-1290	ISG	IL	OK	3.50561	0	-1.79769e+308	-1.79769e+308	0.0416323	0.11081	no
XLOC_010682	XLOC_010682	ISCW024474	DS778035:575-2784	ISG	IL	OK	24.1183	7.86564	-1.61649	1.69362	0.0903366	0.19411	no
XLOC_011240	XLOC_011240	ISCW024473	DS788026:99-1382	ISG	IL	OK	1.37529	5.81416	2.07983	-1.63232	0.102612	0.214715	no
XLOC_012313	XLOC_012313	ISCW024471	DS808243:113-1696	ISG	IL	OK	95.9894	30.2253	-1.66712	1.71861	0.085685	0.187757	no
XLOC_010971	XLOC_010971	ISCW024468	DS783552:1548-4771	ISG	IL	OK	2.39907	0.811381	-1.56403	0.958219	0.337952	0.493064	no
XLOC_010970	XLOC_010970	ISCW024467	DS783491:255-1104	ISG	IL	OK	11.2111	4.30843	-1.37969	1.45588	0.145426	0.279332	no
XLOC_010972	XLOC_010972	ISCW024454	DS783599:2004-6681	ISG	IL	OK	4.2098	2.44712	-0.782668	0.835301	0.403548	0.559919	no
XLOC_012142	XLOC_012142	ISCW024450	DS804698:255-891	ISG	IL	OK	1.52647	0	-1.79769e+308	-1.79769e+308	0.0288898	0.0878738	no
XLOC_012441	XLOC_012441	ISCW024449	DS810034:648-930	ISG	IL	OK	266.061	117.07	-1.18438	1.23077	0.218409	0.360838	no
XLOC_011567	XLOC_011567	ISCW024448	DS793560:221-962	ISG	IL	OK	0.612841	5.18166	3.07983	-2.87563	0.00403227	0.0286708	yes	overexpressed in IL
XLOC_012530	XLOC_012530	ISCW024447	DS811113:619-1093	ISG	IL	OK	9.0075	26.3097	1.5464	-1.65963	0.0969879	0.205383	no
XLOC_011954	XLOC_011954	ISCW024446	DS800681:94-938	ISG	IL	OK	5.52805	9.34808	0.757901	-0.750638	0.452871	0.604795	no
XLOC_010329	XLOC_010329	ISCW024445	DS772389:111-390	ISG	IL	OK	23.8454	1.18489	-4.33089	1.46234	0.143648	0.277124	no
XLOC_012149	XLOC_012149	ISCW024444	DS804905:162-1602	ISG	IL	OK	159.33	291.666	0.8723	-0.879909	0.378909	0.535053	no
XLOC_012005	XLOC_012005	ISCW024442	DS801898:663-909	ISG	IL	OK	6.26046	7.05774	0.172938	-0.131313	0.895528	0.935505	no
XLOC_010605	XLOC_010605	ISCW024431	DS777267:352-4227	ISG	IL	OK	88.9835	70.7884	-0.330026	0.330141	0.741294	0.835485	no
XLOC_010604	XLOC_010604	ISCW024427	DS777248:756-993	ISG	IL	OK	5.32543	16.0097	1.58798	-1.07926	0.280471	0.434047	no
XLOC_011042	XLOC_011042	ISCW024426	DS784688:404-1016	ISG	IL	OK	41.5738	29.6833	-0.486025	0.519884	0.603145	0.735509	no
XLOC_010288	XLOC_010288	ISCW024425	DS771981:1201-1468	ISG	IL	OK	0	2.71017	1.79769e+308	1.79769e+308	0.158655	0.285968	no
XLOC_012577	XLOC_012577	ISCW024424	DS811773:738-933	ISG	IL	OK	2637.6	5237.73	0.989717	-0.959869	0.337121	0.493064	no
XLOC_012092	XLOC_012092	ISCW024422	DS803332:109-815	ISG	IL	OK	12.3575	41.7939	1.7579	-1.88001	0.0601068	0.147426	no
XLOC_011636	XLOC_011636	ISCW024420	DS795235:748-1096	ISG	IL	OK	3.86723	0	-1.79769e+308	-1.79769e+308	0.0293909	0.0878738	no
XLOC_008242	XLOC_008242	ISCW024418	DS738666:1939-4723	ISG	IL	OK	27.4827	93.7226	1.76988	-1.83142	0.0670375	0.159778	no
XLOC_009848	XLOC_009848	ISCW024416	DS763550:590-857	ISG	IL	OK	3.20535	2.71017	-0.242099	0.137017	0.891018	0.93453	no
XLOC_008305	XLOC_008305	ISCW024415	DS739865:650-1281	ISG	IL	OK	12.0496	346.395	4.84536	-4.89442	9.85973e-07	5.92049e-05	yes	overexpressed in IL
XLOC_010103	XLOC_010103	ISCW024414	DS768461:88-280	ISG	IL	OK	128.628	391.411	1.60548	-1.72298	0.084892	0.186376	no
XLOC_008376	XLOC_008376	ISCW024413	DS740957:62-8467	ISG	IL	OK	16.7665	98.0388	2.54777	-2.60652	0.0091468	0.051273	no
XLOC_007940	XLOC_007940	ISCW024411	DS733320:120-1241	ISG	IL	OK	374.28	312.821	-0.258778	0.259711	0.795087	0.875406	no
XLOC_010058	XLOC_010058	ISCW024410	DS767061:2152-2329	ISG	IL	OK	0	72.4783	1.79769e+308	1.79769e+308	0.0288898	0.0878738	no
XLOC_010049	XLOC_010049	ISCW024409	DS766894:1547-1736	ISG	IL	OK	5.47383	92.564	4.07983	-2.54985	0.0107769	0.0573284	no
XLOC_009730	XLOC_009730	ISCW024408	DS762025:794-1420	ISG	IL	OK	13.5473	11.4533	-0.242235	0.259287	0.795414	0.875406	no
XLOC_009546	XLOC_009546	ISCW024407	DS758288:5112-5466	ISG	IL	OK	0	13.8153	1.79769e+308	1.79769e+308	0.017132	0.0678946	no
XLOC_010180	XLOC_010180	ISCW024405	DS769488:887-8473	ISG	IL	OK	118.422	16.9707	-2.80281	2.86672	0.00414749	0.029105	yes	overexpressed in ISG
XLOC_008536	XLOC_008536	ISCW024403	DS744334:734-992	ISG	IL	OK	7.14411	0	-1.79769e+308	-1.79769e+308	0.0227501	0.0762482	no
XLOC_009002	XLOC_009002	ISCW024395	DS750145:5505-6889	ISG	IL	OK	0.0925735	5.94869	6.00583	-3.7869	0.000152536	0.00271231	yes	overexpressed in IL
XLOC_009612	XLOC_009612	ISCW024389	DS759691:963-1884	ISG	IL	OK	0.763496	6.71368	3.13641	-3.11022	0.00186949	0.0164175	yes	overexpressed in IL
XLOC_009830	XLOC_009830	ISCW024385	DS763062:1402-1669	ISG	IL	OK	4.80803	216.814	5.49487	-5.13329	2.84722e-07	2.12044e-05	yes	overexpressed in IL
XLOC_009495	XLOC_009495	ISCW024379	DS757100:1780-5922	ISG	IL	OK	87.2843	140.388	0.685631	-0.683461	0.494316	0.643289	no
XLOC_010057	XLOC_010057	ISCW024370	DS766997:348-7518	ISG	IL	OK	308.476	33.8844	-3.18646	3.1594	0.00158096	0.0147056	yes	overexpressed in ISG
XLOC_008712	XLOC_008712	ISCW024367	DS746947:91-545	ISG	IL	OK	67.9212	11.6984	-2.53756	2.63082	0.0085179	0.0486755	yes	overexpressed in ISG
XLOC_008571	XLOC_008571	ISCW024365	DS744991:47-905	ISG	IL	OK	3.51964	0.849753	-2.05031	1.9269	0.053992	0.136245	no
XLOC_008552	XLOC_008552	ISCW024364	DS744673:2920-3853	ISG	IL	OK	2.05362	3.0531	0.572102	-0.597401	0.550239	0.693178	no
XLOC_009256	XLOC_009256	ISCW024360	DS754423:78-273	ISG	IL	OK	48.5307	0	-1.79769e+308	-1.79769e+308	0.0182669	0.070178	no
XLOC_010211	XLOC_010211	ISCW024359	DS770470:610-1611	ISG	IL	OK	31.3023	45.8753	0.55145	-0.578407	0.562989	0.702909	no
XLOC_009836	XLOC_009836	ISCW024352	DS763181:177-360	ISG	IL	OK	62.3124	32.9288	-0.920171	0.797517	0.425151	0.58069	no
XLOC_008502	XLOC_008502	ISCW024342	DS743934:88-631	ISG	IL	OK	0.731402	9.34487	3.67544	-2.54171	0.0110312	0.0581686	no
XLOC_008815	XLOC_008815	ISCW024340	DS748565:3874-5399	ISG	IL	OK	12.6728	6.02722	-1.07217	1.11711	0.263946	0.414297	no
XLOC_008239	XLOC_008239	ISCW024338	DS738594:813-1455	ISG	IL	OK	17.9821	9.68263	-0.893091	0.89006	0.373434	0.529343	no
XLOC_008363	XLOC_008363	ISCW024336	DS740920:0-283	ISG	IL	OK	162.544	6.81474	-4.57602	4.24006	2.23461e-05	0.000677665	yes	overexpressed in ISG
XLOC_010189	XLOC_010189	ISCW024335	DS769651:1131-2009	ISG	IL	OK	48.0863	53.8116	0.162291	-0.167992	0.866589	0.920696	no
XLOC_009720	XLOC_009720	ISCW024332	DS761793:4482-8829	ISG	IL	OK	0	4.28329	1.79769e+308	1.79769e+308	0.0293909	0.0878738	no
XLOC_009065	XLOC_009065	ISCW024327	DS751838:210-3869	ISG	IL	OK	1.45689	0	-1.79769e+308	-1.79769e+308	0.0227501	0.0762482	no
XLOC_009352	XLOC_009352	ISCW024323	DS755473:220-1510	ISG	IL	OK	2.42662	2.05174	-0.242099	0.241117	0.809464	0.88383	no
XLOC_009614	XLOC_009614	ISCW024322	DS759793:3917-4564	ISG	IL	OK	9.94619	102.598	3.36671	-3.50888	0.000449998	0.0059254	yes	overexpressed in IL
XLOC_008218	XLOC_008218	ISCW024321	DS738073:105-1241	ISG	IL	OK	18.4701	4.19554	-2.13826	2.21331	0.0268763	0.0852917	no
XLOC_008745	XLOC_008745	ISCW024317	DS747404:1208-2192	ISG	IL	OK	24.409	130.708	2.42087	-2.40133	0.0163358	0.0672943	no
XLOC_008484	XLOC_008484	ISCW024315	DS743468:4057-4738	ISG	IL	OK	2123.37	3121.21	0.555751	-0.459194	0.646095	0.769397	no
XLOC_008840	XLOC_008840	ISCW024314	DS748860:996-7260	ISG	IL	OK	65.6299	43.905	-0.579969	0.600266	0.548329	0.691303	no
XLOC_007798	XLOC_007798	ISCW024307	DS730628:1382-1562	ISG	IL	OK	1099.83	428.329	-1.36049	1.42118	0.155263	0.285968	no
XLOC_006992	XLOC_006992	ISCW024306	DS716790:110-299	ISG	IL	OK	43.7906	518.359	3.56526	-3.70127	0.000214524	0.00348003	yes	overexpressed in IL
XLOC_006797	XLOC_006797	ISCW024305	DS713972:1197-4706	ISG	IL	OK	0	12.1365	1.79769e+308	1.79769e+308	0.0169474	0.0678946	no
XLOC_007802	XLOC_007802	ISCW024301	DS730693:5545-6079	ISG	IL	OK	0	5.6488	1.79769e+308	1.79769e+308	0.0185281	0.070178	no
XLOC_006609	XLOC_006609	ISCW024300	DS711181:1029-1344	ISG	IL	OK	2.98386	0	-1.79769e+308	-1.79769e+308	0.0416323	0.11081	no
XLOC_007479	XLOC_007479	ISCW024299	DS725419:388-1716	ISG	IL	OK	4.22516	4.6516	0.138723	-0.119951	0.904522	0.941717	no
XLOC_006039	XLOC_006039	ISCW024297	DS703539:376-1089	ISG	IL	OK	30.6752	20.2969	-0.595813	0.635038	0.525404	0.670181	no
XLOC_007763	XLOC_007763	ISCW024296	DS729989:1673-2246	ISG	IL	OK	5.73204	2.07708	-1.46449	1.3654	0.172128	0.302179	no
XLOC_006172	XLOC_006172	ISCW024295	DS705155:763-961	ISG	IL	OK	11320.3	277450	4.61524	-3.67612	0.000236811	0.00373894	yes	overexpressed in IL
XLOC_006330	XLOC_006330	ISCW024292	DS707674:105-4122	ISG	IL	OK	1.36797	0	-1.79769e+308	-1.79769e+308	0.0293909	0.0878738	no
XLOC_007808	XLOC_007808	ISCW024291	DS730830:916-1750	ISG	IL	OK	27.1271	4.0476	-2.7446	2.71254	0.00667703	0.0405823	yes	overexpressed in ISG
XLOC_005441	XLOC_005441	ISCW024289	DS693825:571-1472	ISG	IL	OK	86.6869	48.863	-0.827071	0.856462	0.391743	0.547914	no
XLOC_006147	XLOC_006147	ISCW024287	DS704753:745-1072	ISG	IL	OK	46.9211	47.3101	0.0119092	-0.0127563	0.989822	0.993187	no
XLOC_006756	XLOC_006756	ISCW024286	DS713003:493-5903	ISG	IL	OK	80.1933	31.8266	-1.33325	1.40683	0.159478	0.286117	no
XLOC_007144	XLOC_007144	ISCW024285	DS719137:286-793	ISG	IL	OK	86.5537	25.0911	-1.78642	1.7763	0.0756829	0.175622	no
XLOC_006940	XLOC_006940	ISCW024282	DS715683:677-1515	ISG	IL	OK	109.962	45.4409	-1.27494	1.30487	0.191938	0.329845	no
XLOC_005506	XLOC_005506	ISCW024281	DS694936:1964-2477	ISG	IL	OK	29.9926	3.05669	-3.29457	3.25772	0.00112311	0.0116935	yes	overexpressed in ISG
XLOC_005482	XLOC_005482	ISCW024280	DS694430:63-7944	ISG	IL	OK	20.3095	1.77641	-3.51512	3.30045	0.000965314	0.0104445	yes	overexpressed in ISG
XLOC_005635	XLOC_005635	ISCW024279	DS696238:60-1169	ISG	IL	OK	0	69.6773	1.79769e+308	1.79769e+308	0.02309	0.0770048	no
XLOC_007403	XLOC_007403	ISCW024278	DS724039:1079-1817	ISG	IL	OK	1.23262	0.3474	-1.82706	1.12034	0.262568	0.412792	no
XLOC_005666	XLOC_005666	ISCW024275	DS697332:68-1165	ISG	IL	OK	299.1	885.125	1.56526	-1.65777	0.0973634	0.206026	no
XLOC_006810	XLOC_006810	ISCW024273	DS714293:1776-1977	ISG	IL	OK	0	7.2791	1.79769e+308	1.79769e+308	0.158655	0.285968	no
XLOC_006755	XLOC_006755	ISCW024271	DS712989:709-940	ISG	IL	OK	2.58637	0	-1.79769e+308	-1.79769e+308	0.158655	0.285968	no
XLOC_007246	XLOC_007246	ISCW024270	DS721008:650-1025	ISG	IL	OK	23.4479	19.8378	-0.241207	0.257717	0.796625	0.876008	no
XLOC_005833	XLOC_005833	ISCW024268	DS699534:861-1077	ISG	IL	OK	65.757	44.4788	-0.564027	0.586477	0.557555	0.698711	no
XLOC_005670	XLOC_005670	ISCW024267	DS697645:1166-1394	ISG	IL	OK	0	4.57882	1.79769e+308	1.79769e+308	0.158655	0.285968	no
XLOC_007735	XLOC_007735	ISCW024266	DS729367:332-1250	ISG	IL	OK	20.8549	9.33516	-1.15964	1.21596	0.224001	0.367742	no
XLOC_007497	XLOC_007497	ISCW024264	DS725694:43-1238	ISG	IL	OK	44.8787	134.657	1.58519	-1.69681	0.0897331	0.19385	no
XLOC_005648	XLOC_005648	ISCW024257	DS696653:47-1196	ISG	IL	OK	5.99548	2.53463	-1.2421	1.1551	0.248051	0.397666	no
XLOC_007032	XLOC_007032	ISCW024256	DS717264:1249-1528	ISG	IL	OK	1.40138	0	-1.79769e+308	-1.79769e+308	0.158655	0.285968	no
XLOC_007108	XLOC_007108	ISCW024255	DS718327:451-6211	ISG	IL	OK	3.41513	2.56671	-0.412024	0.410271	0.681607	0.795659	no
XLOC_007669	XLOC_007669	ISCW024253	DS728083:88-2526	ISG	IL	OK	13.3973	3.57713	-1.90506	1.79057	0.0733621	0.171258	no
XLOC_006716	XLOC_006716	ISCW024252	DS712584:532-2029	ISG	IL	OK	1.54816	2.61798	0.757901	-0.371469	0.710288	0.812031	no
XLOC_007376	XLOC_007376	ISCW024250	DS723377:2237-8922	ISG	IL	OK	61.99	39.7926	-0.639534	0.644495	0.519255	0.665623	no
XLOC_005878	XLOC_005878	ISCW024249	DS700758:418-3666	ISG	IL	OK	5.41412	786.059	7.18177	-7.0353	1.98841e-12	9.91525e-10	yes	overexpressed in IL
XLOC_007245	XLOC_007245	ISCW024245	DS720939:543-816	ISG	IL	OK	0	7.59219	1.79769e+308	1.79769e+308	0.0416323	0.11081	no
XLOC_006001	XLOC_006001	ISCW024242	DS702955:974-1364	ISG	IL	OK	41.27	67.7661	0.71547	-0.757815	0.448562	0.600454	no
XLOC_006551	XLOC_006551	ISCW024240	DS710095:3462-4775	ISG	IL	OK	0	2.61798	1.79769e+308	1.79769e+308	0.158655	0.285968	no
XLOC_007553	XLOC_007553	ISCW024237	DS727091:3811-3994	ISG	IL	OK	74.7749	10.5372	-2.82706	1.7725	0.076312	0.175622	no
XLOC_006565	XLOC_006565	ISCW024224	DS710328:4004-5020	ISG	IL	OK	3.61607	15.5805	2.10725	-2.19559	0.0281216	0.0878738	no
XLOC_005963	XLOC_005963	ISCW024223	DS702500:6931-8960	ISG	IL	OK	1.34079	0.226731	-2.56403	1.60249	0.109047	0.224818	no
XLOC_007378	XLOC_007378	ISCW024220	DS723453:5559-7266	ISG	IL	OK	51.0787	81.5769	0.675439	-0.716053	0.473958	0.624242	no
XLOC_007142	XLOC_007142	ISCW024218	DS719102:271-1443	ISG	IL	OK	349.986	329.565	-0.0867351	0.086919	0.930736	0.95874	no
XLOC_006967	XLOC_006967	ISCW024215	DS716391:1248-7997	ISG	IL	OK	0	4.92547	1.79769e+308	1.79769e+308	0.0227501	0.0762482	no
XLOC_007781	XLOC_007781	ISCW024211	DS730086:779-1295	ISG	IL	OK	24.3967	5.99568	-2.02469	2.10812	0.0350205	0.100327	no
XLOC_005734	XLOC_005734	ISCW024210	DS698474:723-1143	ISG	IL	OK	36.4764	54.7325	0.585434	-0.62046	0.534955	0.679521	no
XLOC_007820	XLOC_007820	ISCW024209	DS730899:106-646	ISG	IL	OK	1.99849	1.68975	-0.242099	0.193771	0.846355	0.907957	no
XLOC_005877	XLOC_005877	ISCW024206	DS700694:783-960	ISG	IL	OK	0	6.03986	1.79769e+308	1.79769e+308	0.308538	0.464203	no
XLOC_003856	XLOC_003856	ISCW024205	DS670170:229-3798	ISG	IL	OK	23.5678	10.8692	-1.11657	1.164	0.244426	0.393503	no
XLOC_004843	XLOC_004843	ISCW024204	DS684848:23-557	ISG	IL	OK	19.4886	15.8219	-0.300709	0.321776	0.747622	0.839646	no
XLOC_003545	XLOC_003545	ISCW024201	DS663366:1627-1990	ISG	IL	OK	0	2.36972	1.79769e+308	1.79769e+308	0.0786496	0.175622	no
XLOC_004573	XLOC_004573	ISCW024200	DS680282:782-1376	ISG	IL	OK	1.12841	33.3931	4.88718	-4.96936	6.71734e-07	4.45325e-05	yes	overexpressed in IL
XLOC_004607	XLOC_004607	ISCW024190	DS681121:1184-1631	ISG	IL	OK	12.3042	1.54124	-2.99699	2.46796	0.0135884	0.066059	no
XLOC_004641	XLOC_004641	ISCW024187	DS681902:98-420	ISG	IL	OK	5756.54	6350.4	0.141648	-0.131302	0.895537	0.935505	no
XLOC_005201	XLOC_005201	ISCW024185	DS690299:961-2383	ISG	IL	OK	1.45505	5.33116	1.87338	-1.84246	0.0654078	0.157061	no
XLOC_004375	XLOC_004375	ISCW024183	DS676497:1849-6781	ISG	IL	OK	20.4488	3.84216	-2.41202	1.98004	0.0476992	0.123129	no
XLOC_004165	XLOC_004165	ISCW024180	DS674167:264-1164	ISG	IL	OK	2.98935	2.66056	-0.168099	0.175551	0.860647	0.916675	no
XLOC_003383	XLOC_003383	ISCW024177	DS661444:298-595	ISG	IL	OK	1.16854	0	-1.79769e+308	-1.79769e+308	0.158655	0.285968	no
XLOC_003718	XLOC_003718	ISCW024173	DS667719:3791-4208	ISG	IL	OK	40.6472	0	-1.79769e+308	-1.79769e+308	0.0158367	0.0672943	no
XLOC_003717	XLOC_003717	ISCW024172	DS667719:3046-3529	ISG	IL	OK	20.9894	1.5068	-3.80009	2.63287	0.00846658	0.0485134	yes	overexpressed in ISG
XLOC_003104	XLOC_003104	ISCW024171	DS656484:513-723	ISG	IL	OK	43.7772	0	-1.79769e+308	-1.79769e+308	0.0169474	0.0678946	no
XLOC_005284	XLOC_005284	ISCW024170	DS691488:1019-1295	ISG	IL	OK	240.32	306.012	0.348633	-0.356724	0.721298	0.821606	no
XLOC_003275	XLOC_003275	ISCW024169	DS659511:30-5616	ISG	IL	OK	1.24585	0.421354	-1.56403	0.958219	0.337952	0.493064	no
XLOC_003683	XLOC_003683	ISCW024168	DS667010:662-1161	ISG	IL	OK	37.4241	0.632852	-5.88596	3.69053	0.000223785	0.00357962	yes	overexpressed in ISG
XLOC_003547	XLOC_003547	ISCW024167	DS663428:1117-1273	ISG	IL	OK	24.6175	0	-1.79769e+308	-1.79769e+308	0.0786496	0.175622	no
XLOC_005272	XLOC_005272	ISCW024164	DS691051:354-822	ISG	IL	OK	2.09443	0	-1.79769e+308	-1.79769e+308	0.0293909	0.0878738	no
XLOC_005271	XLOC_005271	ISCW024163	DS691024:1040-1277	ISG	IL	OK	47.3683	8.00485	-2.56498	2.1104	0.0348242	0.100144	no
XLOC_004708	XLOC_004708	ISCW024161	DS682950:279-593	ISG	IL	OK	2.36686	40.0243	4.07983	-2.54985	0.0107769	0.0573284	no
XLOC_004431	XLOC_004431	ISCW024157	DS677700:0-2167	ISG	IL	OK	1.13539	2.34663	1.04741	-1.07312	0.283219	0.437238	no
XLOC_003782	XLOC_003782	ISCW024154	DS668592:195-708	ISG	IL	OK	7.26062	5.45298	-0.413047	0.429985	0.667207	0.785888	no
XLOC_004740	XLOC_004740	ISCW024152	DS683608:217-589	ISG	IL	OK	2.65173	0	-1.79769e+308	-1.79769e+308	0.0227501	0.0762482	no
XLOC_003266	XLOC_003266	ISCW024151	DS658969:1498-3926	ISG	IL	OK	11.8458	4.00632	-1.56403	1.46033	0.1442	0.277535	no
XLOC_004558	XLOC_004558	ISCW024148	DS680103:1191-1832	ISG	IL	OK	1.50407	1.01737	-0.564027	0.442668	0.658006	0.778328	no
XLOC_004968	XLOC_004968	ISCW024147	DS686924:3459-3789	ISG	IL	OK	1.76304	1.49068	-0.242099	0.137017	0.891018	0.93453	no
XLOC_003058	XLOC_003058	ISCW024145	DS656378:408-933	ISG	IL	OK	2.0612	0	-1.79769e+308	-1.79769e+308	0.0288898	0.0878738	no
XLOC_002950	XLOC_002950	ISCW024141	DS654483:38-521	ISG	IL	OK	1.5841	0	-1.79769e+308	-1.79769e+308	0.0227501	0.0762482	no
XLOC_004255	XLOC_004255	ISCW024140	DS674754:154-895	ISG	IL	OK	26.965	3.46403	-2.96056	3.03623	0.00239555	0.0196809	yes	overexpressed in ISG
XLOC_004536	XLOC_004536	ISCW024139	DS679812:839-1079	ISG	IL	OK	526.054	671.014	0.351131	-0.354938	0.722636	0.822621	no
XLOC_004443	XLOC_004443	ISCW024135	DS677871:43-1213	ISG	IL	OK	6.39195	0.372723	-4.10008	2.58565	0.00971969	0.0533119	no
XLOC_003894	XLOC_003894	ISCW024132	DS670649:1114-1369	ISG	IL	OK	16.6913	43.9062	1.39533	-1.43548	0.151152	0.285968	no
XLOC_004400	XLOC_004400	ISCW024131	DS677077:577-7204	ISG	IL	OK	7.52118	1.51411	-2.31249	2.29176	0.0219195	0.0761572	no
XLOC_004704	XLOC_004704	ISCW024127	DS682734:693-1770	ISG	IL	OK	56.8946	72.4164	0.348025	-0.354536	0.722937	0.822777	no
XLOC_004844	XLOC_004844	ISCW024125	DS684855:507-786	ISG	IL	OK	51.861	1.18489	-5.45182	1.84215	0.0654538	0.157082	no
XLOC_003762	XLOC_003762	ISCW024121	DS668188:369-979	ISG	IL	OK	933.191	1161	0.315118	-0.324914	0.745246	0.838454	no
XLOC_003278	XLOC_003278	ISCW024120	DS659691:296-4435	ISG	IL	OK	11.7594	50.4501	2.10105	-2.19629	0.0280714	0.0878738	no
XLOC_004096	XLOC_004096	ISCW024119	DS672917:399-813	ISG	IL	OK	2.11478	25.033	3.56526	-3.65197	0.000260238	0.00401571	yes	overexpressed in IL
XLOC_004472	XLOC_004472	ISCW024112	DS678798:26-1047	ISG	IL	OK	0	6.31727	1.79769e+308	1.79769e+308	0.130295	0.256937	no
XLOC_004339	XLOC_004339	ISCW024111	DS675871:586-1823	ISG	IL	OK	654.458	652.426	-0.00448731	0.00394236	0.996854	0.997724	no
XLOC_003779	XLOC_003779	ISCW024106	DS668443:4938-9472	ISG	IL	OK	23.296	5.31157	-2.13287	2.2243	0.026128	0.083986	no
XLOC_005047	XLOC_005047	ISCW024103	DS688419:41-5147	ISG	IL	OK	46.9911	17.5161	-1.42371	1.48336	0.13798	0.267719	no
XLOC_004338	XLOC_004338	ISCW024102	DS675818:297-1136	ISG	IL	OK	50.6799	899.863	4.15022	-4.24525	2.18351e-05	0.000673189	yes	overexpressed in IL
XLOC_004004	XLOC_004004	ISCW024100	DS671941:1945-2310	ISG	IL	OK	11.9725	12.6536	0.079829	-0.0771518	0.938503	0.963194	no
XLOC_004003	XLOC_004003	ISCW024099	DS671941:603-1041	ISG	IL	OK	53.9851	48.8484	-0.144252	0.151202	0.879817	0.928888	no
XLOC_004509	XLOC_004509	ISCW024097	DS679417:8-548	ISG	IL	OK	0.656012	14.4213	4.45834	-3.67117	0.000241444	0.00378296	yes	overexpressed in IL
XLOC_001112	XLOC_001112	ISCW024096	DS627337:1093-1457	ISG	IL	OK	14.3936	0	-1.79769e+308	-1.79769e+308	0.0146642	0.066059	no
XLOC_000552	XLOC_000552	ISCW024094	DS618358:85-754	ISG	IL	OK	59.5697	45.7882	-0.379603	0.397266	0.691171	0.802047	no
XLOC_000375	XLOC_000375	ISCW024090	DS616678:418-1655	ISG	IL	OK	15.6606	8.36292	-0.905064	0.897759	0.369314	0.525061	no
XLOC_000635	XLOC_000635	ISCW024086	DS620129:177-864	ISG	IL	OK	17.7314	8.46134	-1.06735	1.13179	0.257721	0.408711	no
XLOC_000855	XLOC_000855	ISCW024085	DS623242:176-5200	ISG	IL	OK	26.721	4.79245	-2.47914	2.53745	0.0111665	0.0586661	no
XLOC_001156	XLOC_001156	ISCW024082	DS628315:161-776	ISG	IL	OK	338.149	295.921	-0.192447	0.19513	0.845291	0.907957	no
XLOC_000864	XLOC_000864	ISCW024081	DS623534:713-1571	ISG	IL	OK	2.28029	0	-1.79769e+308	-1.79769e+308	0.0227501	0.0762482	no
XLOC_000613	XLOC_000613	ISCW024080	DS619910:417-930	ISG	IL	OK	17.1387	2.41516	-2.82706	2.88901	0.00386457	0.0277364	yes	overexpressed in ISG
XLOC_002517	XLOC_002517	ISCW024078	DS648079:1017-1392	ISG	IL	OK	0	51.7565	1.79769e+308	1.79769e+308	0.014471	0.066059	no
XLOC_002584	XLOC_002584	ISCW024076	DS649001:180-1164	ISG	IL	OK	13.6542	33.5087	1.29519	-1.3581	0.174431	0.305604	no
XLOC_001455	XLOC_001455	ISCW024074	DS633539:614-2168	ISG	IL	OK	65.0225	20.9438	-1.63442	1.70103	0.0889368	0.192383	no
XLOC_002530	XLOC_002530	ISCW024073	DS648429:1108-8576	ISG	IL	OK	82.6914	21.5919	-1.93724	2.02543	0.0428236	0.113376	no
XLOC_001271	XLOC_001271	ISCW024070	DS630315:15-735	ISG	IL	OK	1.27597	1.07885	-0.242099	0.214664	0.83003	0.897484	no
XLOC_000571	XLOC_000571	ISCW024069	DS619006:594-929	ISG	IL	OK	98.293	15.6808	-2.64809	2.62016	0.00878886	0.0497529	yes	overexpressed in ISG
XLOC_001023	XLOC_001023	ISCW024068	DS626432:1481-2947	ISG	IL	OK	16.2894	82.6377	2.34286	-2.4749	0.0133273	0.066059	no
XLOC_000867	XLOC_000867	ISCW024067	DS623706:501-660	ISG	IL	OK	2487.42	3785.66	0.605898	-0.611749	0.540704	0.685003	no
XLOC_000315	XLOC_000315	ISCW024061	DS615644:1189-1390	ISG	IL	OK	0	7.2791	1.79769e+308	1.79769e+308	0.158655	0.285968	no
XLOC_001099	XLOC_001099	ISCW024059	DS627140:89-569	ISG	IL	OK	354.632	703.986	0.989226	-1.00035	0.31714	0.473974	no
XLOC_002206	XLOC_002206	ISCW024054	DS643745:3575-4115	ISG	IL	OK	0.738013	12.2027	4.04741	-2.80713	0.00499847	0.0331564	yes	overexpressed in IL
XLOC_002027	XLOC_002027	ISCW024050	DS641885:203-797	ISG	IL	OK	0	3.35919	1.79769e+308	1.79769e+308	0.0210387	0.0747731	no
XLOC_001816	XLOC_001816	ISCW024049	DS638704:1825-6172	ISG	IL	OK	27.1074	11.5238	-1.23406	1.28475	0.198879	0.338338	no
XLOC_000981	XLOC_000981	ISCW024046	DS625513:728-1205	ISG	IL	OK	3.25337	6.86537	1.0774	-1.08185	0.279318	0.432788	no
XLOC_001782	XLOC_001782	ISCW024045	DS637858:23-875	ISG	IL	OK	3.55033	1.14356	-1.63442	1.66875	0.0951662	0.202646	no
XLOC_002180	XLOC_002180	ISCW024043	DS643283:945-1284	ISG	IL	OK	21.4303	6.9691	-1.62061	1.60708	0.108038	0.223687	no
XLOC_000309	XLOC_000309	ISCW024042	DS615543:1658-2897	ISG	IL	OK	0	5.52476	1.79769e+308	1.79769e+308	0.0288898	0.0878738	no
XLOC_001787	XLOC_001787	ISCW024039	DS638005:344-542	ISG	IL	OK	13267.9	23971.2	0.853364	-0.760227	0.447119	0.5995	no
XLOC_002651	XLOC_002651	ISCW024035	DS650019:1999-3010	ISG	IL	OK	6.46704	9.37367	0.535508	-0.513423	0.607655	0.739171	no
XLOC_001443	XLOC_001443	ISCW024033	DS633319:202-5985	ISG	IL	OK	49.7539	11.767	-2.08006	2.17471	0.0296517	0.0885153	no
XLOC_002230	XLOC_002230	ISCW024032	DS644406:510-1023	ISG	IL	OK	71.5163	61.1966	-0.224821	0.238419	0.811556	0.885521	no
XLOC_000220	XLOC_000220	ISCW024028	DS614311:320-1418	ISG	IL	OK	943.112	556.686	-0.760566	0.802485	0.422273	0.578067	no
XLOC_002625	XLOC_002625	ISCW024025	DS649342:1109-1718	ISG	IL	OK	1.35774	0	-1.79769e+308	-1.79769e+308	0.0293909	0.0878738	no
XLOC_000248	XLOC_000248	ISCW024023	DS614519:1634-4813	ISG	IL	OK	17.4997	89.455	2.35383	-2.36766	0.017901	0.0693894	no
XLOC_001461	XLOC_001461	ISCW024021	DS633735:4024-4324	ISG	IL	OK	51.1219	21.1319	-1.27452	1.34328	0.17918	0.312114	no
XLOC_000026	XLOC_000026	ISCW024020	DS612508:3751-4822	ISG	IL	OK	0	16.0277	1.79769e+308	1.79769e+308	0.017132	0.0678946	no
XLOC_000574	XLOC_000574	ISCW024016	DS619051:2017-2214	ISG	IL	OK	9.30254	47.1926	2.34286	-1.84139	0.0655651	0.157082	no
XLOC_001445	XLOC_001445	ISCW024015	DS633368:479-1253	ISG	IL	OK	5.17274	0	-1.79769e+308	-1.79769e+308	0.0786496	0.175622	no
XLOC_000891	XLOC_000891	ISCW024013	DS624291:9-561	ISG	IL	OK	0.712259	15.524	4.44596	-3.08447	0.00203918	0.0176642	yes	overexpressed in IL
XLOC_000596	XLOC_000596	ISCW024012	DS619609:556-4028	ISG	IL	OK	209.462	78.9262	-1.40811	1.408	0.159131	0.286117	no
XLOC_001486	XLOC_001486	ISCW024010	DS634263:51-396	ISG	IL	OK	368.8	471.41	0.354147	-0.348888	0.727174	0.825656	no
XLOC_002582	XLOC_002582	ISCW024008	DS648904:180-735	ISG	IL	OK	165.57	299.511	0.855173	-0.915714	0.359817	0.515935	no
XLOC_022843	XLOC_022843	ISCW024005	DS974061:93654-103698	ISG	IL	OK	2.67468	2.12845	-0.329562	0.340945	0.733145	0.830027	no
XLOC_023240	XLOC_023240	ISCW024002	DS980579:46589-62526	ISG	IL	OK	8.67585	5.21953	-0.733085	0.773836	0.439028	0.593915	no
XLOC_023239	XLOC_023239	ISCW024001	DS980579:42665-43070	ISG	IL	OK	18.2418	19.6302	0.105824	-0.113398	0.909715	0.944979	no
XLOC_023238	XLOC_023238	ISCW024000	DS980579:27376-31375	ISG	IL	OK	11.624	62.0875	2.4172	-2.41917	0.015556	0.0671225	no
XLOC_023237	XLOC_023237	ISCW023999	DS980579:3898-17565	ISG	IL	OK	31.5849	18.1949	-0.795697	0.812645	0.416422	0.572393	no
XLOC_023095	XLOC_023095	ISCW023994	DS979385:73981-350165	ISG	IL	OK	4.98157	0.701997	-2.82706	2.88901	0.00386457	0.0277364	yes	overexpressed in ISG
XLOC_022740	XLOC_022740	ISCW023993	DS972334:453450-454896	ISG	IL	OK	27.5076	37.8802	0.461615	-0.465673	0.64145	0.765774	no
XLOC_022739	XLOC_022739	ISCW023992	DS972334:439396-439816	ISG	IL	OK	1.02751	5.21262	2.34286	-1.84139	0.0655651	0.157082	no
XLOC_022743	XLOC_022743	ISCW023990	DS972334:388332-389502	ISG	IL	OK	22.6339	14.353	-0.657137	0.678292	0.497586	0.646201	no
XLOC_022737	XLOC_022737	ISCW023989	DS972334:379559-386748	ISG	IL	OK	70.3751	166.304	1.24068	-1.29545	0.195166	0.333784	no
XLOC_022990	XLOC_022990	ISCW023985	DS977479:222846-228376	ISG	IL	OK	43.7361	5.07562	-3.10717	3.15023	0.00163143	0.0148617	yes	overexpressed in ISG
XLOC_022892	XLOC_022892	ISCW023977	DS975458:91493-135224	ISG	IL	OK	0.492627	2.08262	2.07983	-2.08081	0.0374513	0.105432	no
XLOC_023132	XLOC_023132	ISCW023976	DS979495:631224-632100	ISG	IL	OK	10.9202	5.23672	-1.06026	1.12813	0.259265	0.410439	no
XLOC_023140	XLOC_023140	ISCW023973	DS979495:613709-625429	ISG	IL	OK	75.0021	39.2502	-0.934233	0.91185	0.361848	0.518192	no
XLOC_023139	XLOC_023139	ISCW023971	DS979495:553112-575292	ISG	IL	OK	4.46109	1.12724	-1.9846	2.07859	0.0376551	0.105953	no
XLOC_023138	XLOC_023138	ISCW023970	DS979495:536680-537058	ISG	IL	OK	1.27973	2.16406	0.757901	-0.525337	0.599349	0.732137	no
XLOC_023128	XLOC_023128	ISCW023969	DS979495:516321-519954	ISG	IL	OK	7.43283	21.7425	1.54854	-1.6537	0.0981885	0.207657	no
XLOC_023127	XLOC_023127	ISCW023967	DS979495:495331-507544	ISG	IL	OK	14.4727	21.6081	0.578233	-0.600097	0.548441	0.691312	no
XLOC_023137	XLOC_023137	ISCW023966	DS979495:461816-472411	ISG	IL	OK	6.35187	19.9786	1.6532	-1.7457	0.0808631	0.179663	no
XLOC_023134	XLOC_023134	ISCW023962	DS979495:110011-117965	ISG	IL	OK	0	11.706	1.79769e+308	1.79769e+308	0.0786496	0.175622	no
XLOC_023125	XLOC_023125	ISCW023960	DS979495:64486-85786	ISG	IL	OK	32.4343	106.546	1.71588	-1.66392	0.0961281	0.204058	no
XLOC_023124	XLOC_023124	ISCW023959	DS979495:56363-59336	ISG	IL	OK	36.8356	6.26818	-2.55498	2.65146	0.00801441	0.0465876	yes	overexpressed in ISG
XLOC_023123	XLOC_023123	ISCW023958	DS979495:30382-30670	ISG	IL	OK	61.2545	10.7899	-2.50513	2.48043	0.0131223	0.0656776	no
XLOC_023192	XLOC_023192	ISCW023957	DS979971:360093-376586	ISG	IL	OK	6.91575	11.9422	0.788108	-0.843304	0.399059	0.555132	no
XLOC_023200	XLOC_023200	ISCW023956	DS979971:338108-358836	ISG	IL	OK	53.6373	65.63	0.29112	-0.289648	0.772086	0.857549	no
XLOC_023199	XLOC_023199	ISCW023954	DS979971:293459-328020	ISG	IL	OK	6.61504	1.54013	-2.1027	2.19869	0.0279002	0.0875409	no
XLOC_023191	XLOC_023191	ISCW023953	DS979971:289600-291949	ISG	IL	OK	2.9127	4.92547	0.757901	-0.742939	0.457519	0.608522	no
XLOC_023198	XLOC_023198	ISCW023952	DS979971:272205-274704	ISG	IL	OK	16.4577	46.7788	1.50709	-1.59949	0.109712	0.226027	no
XLOC_023190	XLOC_023190	ISCW023951	DS979971:243165-245315	ISG	IL	OK	2.80282	6.7303	1.26379	-1.34334	0.179163	0.312114	no
XLOC_023197	XLOC_023197	ISCW023950	DS979971:227023-242125	ISG	IL	OK	9.1103	5.6021	-0.701531	0.730541	0.46506	0.615269	no
XLOC_023189	XLOC_023189	ISCW023948	DS979971:202466-221031	ISG	IL	OK	9.40936	0.649449	-3.85681	3.17193	0.00151429	0.0142706	yes	overexpressed in ISG
XLOC_023188	XLOC_023188	ISCW023947	DS979971:180631-181699	ISG	IL	OK	15.4923	58.2177	1.9099	-1.98549	0.0470899	0.121885	no
XLOC_023187	XLOC_023187	ISCW023946	DS979971:178582-179435	ISG	IL	OK	5.78759	6.22808	0.105824	-0.107218	0.914616	0.947924	no
XLOC_023196	XLOC_023196	ISCW023945	DS979971:158620-165875	ISG	IL	OK	12.8264	10.2741	-0.320102	0.332573	0.739456	0.834562	no
XLOC_023195	XLOC_023195	ISCW023944	DS979971:144476-145374	ISG	IL	OK	12.8551	13.2846	0.0474075	-0.0497597	0.960314	0.97519	no
XLOC_023186	XLOC_023186	ISCW023943	DS979971:133651-140796	ISG	IL	OK	23.3396	1.6445	-3.82706	3.14804	0.00164368	0.0148801	yes	overexpressed in ISG
XLOC_023194	XLOC_023194	ISCW023942	DS979971:89083-93007	ISG	IL	OK	21.3293	285.7	3.74359	-3.86695	0.000110206	0.00220201	yes	overexpressed in IL
XLOC_023193	XLOC_023193	ISCW023941	DS979971:6916-10368	ISG	IL	OK	0	3.45094	1.79769e+308	1.79769e+308	0.0786496	0.175622	no
XLOC_022911	XLOC_022911	ISCW023939	DS976103:85823-137568	ISG	IL	OK	2.57572	1.80799	-0.510588	0.546471	0.584742	0.721973	no
XLOC_022913	XLOC_022913	ISCW023938	DS976103:69273-79165	ISG	IL	OK	96.5032	19.1988	-2.32956	2.39373	0.0166781	0.0678946	no
XLOC_022912	XLOC_022912	ISCW023937	DS976103:36527-63812	ISG	IL	OK	26.9165	14.2674	-0.915766	0.903979	0.366006	0.521457	no
XLOC_022910	XLOC_022910	ISCW023936	DS976103:929-5550	ISG	IL	OK	2.07638	5.26684	1.34286	-1.01964	0.307898	0.464203	no
XLOC_023091	XLOC_023091	ISCW023919	DS979349:429796-436665	ISG	IL	OK	0	3.62544	1.79769e+308	1.79769e+308	0.0293909	0.0878738	no
XLOC_023079	XLOC_023079	ISCW023915	DS979349:50269-94400	ISG	IL	OK	19.6408	12.3469	-0.669705	0.682963	0.49463	0.643478	no
XLOC_023078	XLOC_023078	ISCW023912	DS979349:5019-30271	ISG	IL	OK	78.5721	55.3615	-0.505134	0.494637	0.620856	0.748056	no
XLOC_023086	XLOC_023086	ISCW023911	DS979349:2963-4201	ISG	IL	OK	1.43586	3.64212	1.34286	-1.3004	0.193465	0.331667	no
XLOC_022759	XLOC_022759	ISCW023910	DS972524:343854-344046	ISG	IL	OK	1856.62	4757.22	1.35744	-1.33218	0.182801	0.317369	no
XLOC_022758	XLOC_022758	ISCW023909	DS972524:331137-333055	ISG	IL	OK	893.826	384.43	-1.21727	1.12361	0.261177	0.412478	no
XLOC_022766	XLOC_022766	ISCW023908	DS972524:301018-324013	ISG	IL	OK	16.244	1.75335	-3.21173	3.26876	0.00108019	0.0113449	yes	overexpressed in ISG
XLOC_022764	XLOC_022764	ISCW023906	DS972524:227770-240867	ISG	IL	OK	0	2.00664	1.79769e+308	1.79769e+308	0.0194336	0.0705669	no
XLOC_022762	XLOC_022762	ISCW023904	DS972524:165263-172208	ISG	IL	OK	0	18.1903	1.79769e+308	1.79769e+308	0.0142299	0.066059	no
XLOC_022761	XLOC_022761	ISCW023903	DS972524:100482-108032	ISG	IL	OK	0.824771	5.97734	2.85744	-2.9438	0.00324208	0.0244789	yes	overexpressed in IL
XLOC_022760	XLOC_022760	ISCW023902	DS972524:44667-52201	ISG	IL	OK	88.1728	78.4751	-0.168099	0.176215	0.860125	0.916545	no
XLOC_022757	XLOC_022757	ISCW023901	DS972524:30836-38697	ISG	IL	OK	32.6951	6.55962	-2.31739	2.40743	0.0160652	0.0672943	no
XLOC_022924	XLOC_022924	ISCW023898	DS976400:271595-341456	ISG	IL	OK	0.447994	2.38094	2.40998	-2.48035	0.0131252	0.0656776	no
XLOC_022932	XLOC_022932	ISCW023897	DS976400:271595-341456	ISG	IL	OK	143.577	81.4299	-0.818194	0.799692	0.423889	0.579312	no
XLOC_022931	XLOC_022931	ISCW023895	DS976400:188714-217873	ISG	IL	OK	12.8882	14.9187	0.211074	-0.210937	0.832936	0.899263	no
XLOC_022923	XLOC_022923	ISCW023894	DS976400:184348-185685	ISG	IL	OK	2.69998	11.4143	2.07983	-2.21762	0.0265807	0.0849372	no
XLOC_022922	XLOC_022922	ISCW023893	DS976400:179195-182199	ISG	IL	OK	22.2814	1.1281	-4.30388	4.16892	3.06047e-05	0.000833742	yes	overexpressed in ISG
XLOC_022930	XLOC_022930	ISCW023892	DS976400:163853-178647	ISG	IL	OK	60.1601	57.4196	-0.0672653	0.0675162	0.946171	0.967686	no
XLOC_022929	XLOC_022929	ISCW023890	DS976400:111999-143396	ISG	IL	OK	10.1088	0.52598	-4.26447	4.27651	1.89849e-05	0.00060315	yes	overexpressed in ISG
XLOC_022928	XLOC_022928	ISCW023889	DS976400:100687-105823	ISG	IL	OK	14.5328	10.381	-0.48537	0.509671	0.610282	0.741397	no
XLOC_022920	XLOC_022920	ISCW023888	DS976400:97491-98010	ISG	IL	OK	82.6386	55.0687	-0.585583	0.599665	0.548729	0.69158	no
XLOC_022927	XLOC_022927	ISCW023887	DS976400:43723-88146	ISG	IL	OK	14.233	1.07217	-3.73063	3.78934	0.000151047	0.00269109	yes	overexpressed in ISG
XLOC_022926	XLOC_022926	ISCW023886	DS976400:34695-42745	ISG	IL	OK	27.0033	55.6073	1.04214	-1.02889	0.303531	0.460476	no
XLOC_023116	XLOC_023116	ISCW023885	DS979437:325802-326621	ISG	IL	OK	3270.69	4399.28	0.427673	-0.406073	0.684689	0.797441	no
XLOC_023115	XLOC_023115	ISCW023884	DS979437:259154-299647	ISG	IL	OK	6.13135	3.60096	-0.767822	0.798976	0.424304	0.579741	no
XLOC_023119	XLOC_023119	ISCW023883	DS979437:241216-258838	ISG	IL	OK	4078.44	6488.01	0.669757	-0.533262	0.593852	0.728606	no
XLOC_023114	XLOC_023114	ISCW023881	DS979437:210067-241214	ISG	IL	OK	12.8117	34.7779	1.44071	-1.53952	0.123676	0.246729	no
XLOC_023113	XLOC_023113	ISCW023880	DS979437:152272-190227	ISG	IL	OK	2.35453	1.13759	-1.04945	1.0406	0.29806	0.454401	no
XLOC_023111	XLOC_023111	ISCW023878	DS979437:4727-51407	ISG	IL	OK	1.66588	0	-1.79769e+308	-1.79769e+308	0.0145482	0.066059	no
XLOC_023117	XLOC_023117	ISCW023877	DS979437:4727-51407	ISG	IL	OK	0	4.78724	1.79769e+308	1.79769e+308	0.0162914	0.0672943	no
XLOC_022819	XLOC_022819	ISCW023875	DS973353:4941-65323	ISG	IL	OK	81.7416	8.81154	-3.2136	3.07914	0.00207599	0.017875	yes	overexpressed in ISG
XLOC_022811	XLOC_022811	ISCW023873	DS973132:757888-783183	ISG	IL	OK	0	17.9832	1.79769e+308	1.79769e+308	0.0151073	0.0668948	no
XLOC_022810	XLOC_022810	ISCW023871	DS973132:591996-704205	ISG	IL	OK	0.214188	3.53144	4.0433	-4.13935	3.48292e-05	0.000912	yes	overexpressed in IL
XLOC_022873	XLOC_022873	ISCW023868	DS974685:269884-277429	ISG	IL	OK	0	6.27231	1.79769e+308	1.79769e+308	0.0786496	0.175622	no
XLOC_022872	XLOC_022872	ISCW023867	DS974685:98077-174145	ISG	IL	OK	22.6692	31.1395	0.458015	-0.443405	0.657473	0.778328	no
XLOC_022869	XLOC_022869	ISCW023866	DS974685:84494-94680	ISG	IL	OK	112.904	541.424	2.26167	-2.27583	0.0228563	0.0764775	no
XLOC_022871	XLOC_022871	ISCW023865	DS974685:63324-82354	ISG	IL	OK	10.0984	3.41534	-1.56403	1.62752	0.103628	0.216486	no
XLOC_022868	XLOC_022868	ISCW023864	DS974685:60484-60784	ISG	IL	OK	113.604	140.239	0.303869	-0.318428	0.750161	0.841592	no
XLOC_023076	XLOC_023076	ISCW023860	DS979224:542114-570575	ISG	IL	OK	4.72	0.694057	-2.76566	2.827	0.00469863	0.0315726	yes	overexpressed in ISG
XLOC_023070	XLOC_023070	ISCW023859	DS979224:283807-313785	ISG	IL	OK	2.24991	0.422741	-2.41202	1.98004	0.0476992	0.123129	no
XLOC_023075	XLOC_023075	ISCW023857	DS979224:171389-185554	ISG	IL	OK	6.90646	1.48642	-2.2161	2.2744	0.0229417	0.0765992	no
XLOC_023073	XLOC_023073	ISCW023855	DS979224:117045-127896	ISG	IL	OK	0.337149	5.70129	4.07983	-2.54985	0.0107769	0.0573284	no
XLOC_022958	XLOC_022958	ISCW023852	DS976794:172468-186688	ISG	IL	OK	192.288	10.3713	-4.2126	4.05375	5.04023e-05	0.00121955	yes	overexpressed in ISG
XLOC_022708	XLOC_022708	ISCW023850	DS972020:94510-94741	ISG	IL	OK	18.1046	0	-1.79769e+308	-1.79769e+308	0.0216541	0.0754501	no
XLOC_022791	XLOC_022791	ISCW023849	DS972997:5444-6471	ISG	IL	OK	5.47383	9959.89	10.8294	-6.66031	2.73248e-11	9.49661e-09	yes	overexpressed in IL
XLOC_022903	XLOC_022903	ISCW023836	DS975797:358971-439762	ISG	IL	OK	24.8794	15.1344	-0.717119	0.717128	0.473295	0.623719	no
XLOC_022902	XLOC_022902	ISCW023833	DS975797:119093-122448	ISG	IL	OK	2.17429	0	-1.79769e+308	-1.79769e+308	0.158655	0.285968	no
XLOC_020727	XLOC_020727	ISCW023827	DS940368:118456-127839	ISG	IL	OK	57.4333	61.9071	0.108216	-0.104704	0.916611	0.949306	no
XLOC_020729	XLOC_020729	ISCW023826	DS940368:105981-113161	ISG	IL	OK	34.4524	38.8399	0.172938	-0.173611	0.862171	0.917702	no
XLOC_020726	XLOC_020726	ISCW023825	DS940368:81013-92514	ISG	IL	OK	3.66196	2.38172	-0.620611	0.649562	0.515975	0.662976	no
XLOC_020728	XLOC_020728	ISCW023824	DS940368:80606-80990	ISG	IL	OK	1.85488	0	-1.79769e+308	-1.79769e+308	0.0416323	0.11081	no
XLOC_020725	XLOC_020725	ISCW023823	DS940368:31689-73093	ISG	IL	OK	5.39304	0.752147	-2.84201	2.91799	0.00352295	0.0259428	yes	overexpressed in ISG
XLOC_021595	XLOC_021595	ISCW023818	DS954749:188828-347866	ISG	IL	OK	4.68114	7.91594	0.757901	-0.814272	0.415489	0.571912	no
XLOC_021594	XLOC_021594	ISCW023817	DS954749:176102-187911	ISG	IL	OK	4.9353	14.2369	1.52842	-1.61681	0.105919	0.22003	no
XLOC_020537	XLOC_020537	ISCW023813	DS937308:449933-514685	ISG	IL	OK	83.3663	56.0037	-0.573943	0.564207	0.572613	0.711132	no
XLOC_020534	XLOC_020534	ISCW023808	DS937308:40363-114104	ISG	IL	OK	1.48674	1.25706	-0.242099	0.193771	0.846355	0.907957	no
XLOC_020696	XLOC_020696	ISCW023805	DS940066:1015973-1016915	ISG	IL	OK	39.4557	37.1228	-0.0879282	0.0889203	0.929145	0.958565	no
XLOC_020702	XLOC_020702	ISCW023804	DS940066:996248-1012552	ISG	IL	OK	1.31586	1.3351	0.0209353	-0.0215759	0.982786	0.98963	no
XLOC_020701	XLOC_020701	ISCW023802	DS940066:931048-978970	ISG	IL	OK	0	2.0238	1.79769e+308	1.79769e+308	0.0416323	0.11081	no
XLOC_020693	XLOC_020693	ISCW023797	DS940066:654809-655088	ISG	IL	OK	0	66.3539	1.79769e+308	1.79769e+308	0.014149	0.066059	no
XLOC_020692	XLOC_020692	ISCW023796	DS940066:629980-630337	ISG	IL	OK	0	7.3882	1.79769e+308	1.79769e+308	0.0288898	0.0878738	no
XLOC_020690	XLOC_020690	ISCW023792	DS940066:514637-522079	ISG	IL	OK	0.284735	2.42754	3.0918	-1.2651	0.205836	0.344683	no
XLOC_020698	XLOC_020698	ISCW023790	DS940066:58405-61782	ISG	IL	OK	0.103053	3.36914	5.03092	-4.72368	2.31619e-06	0.00011401	yes	overexpressed in IL
XLOC_021565	XLOC_021565	ISCW023788	DS953789:61780-100345	ISG	IL	OK	9.46375	3.78264	-1.32302	1.38209	0.166944	0.295293	no
XLOC_021564	XLOC_021564	ISCW023787	DS953789:5207-37228	ISG	IL	OK	18.6185	9.88767	-0.913035	0.938908	0.347778	0.502604	no
XLOC_020333	XLOC_020333	ISCW023784	DS932561:37028-38109	ISG	IL	OK	0.249418	5.27215	4.40176	-3.62606	0.000287779	0.00428086	yes	overexpressed in IL
XLOC_021601	XLOC_021601	ISCW023782	DS954789:246395-250458	ISG	IL	OK	0	12.2324	1.79769e+308	1.79769e+308	0.0151195	0.0668948	no
XLOC_022610	XLOC_022610	ISCW023777	DS970697:293495-343165	ISG	IL	OK	11.9026	4.31305	-1.46449	1.49846	0.134015	0.262002	no
XLOC_020735	XLOC_020735	ISCW023769	DS940670:92390-212589	ISG	IL	OK	2.8876	2.09203	-0.464969	0.491494	0.623077	0.749457	no
XLOC_020734	XLOC_020734	ISCW023768	DS940670:67308-86312	ISG	IL	OK	0.301677	8.38905	4.79743	-3.32815	0.000874257	0.00966315	yes	overexpressed in IL
XLOC_021612	XLOC_021612	ISCW023767	DS954823:289370-292482	ISG	IL	OK	5.55274	0	-1.79769e+308	-1.79769e+308	0.0151195	0.0668948	no
XLOC_021561	XLOC_021561	ISCW023765	DS953774:117162-125094	ISG	IL	OK	30.8411	23.3521	-0.401298	0.401281	0.688213	0.800032	no
XLOC_021563	XLOC_021563	ISCW023764	DS953774:105765-116725	ISG	IL	OK	24.2213	16.8902	-0.520084	0.536415	0.591672	0.727747	no
XLOC_021562	XLOC_021562	ISCW023762	DS953774:70318-79688	ISG	IL	OK	15.8608	5.36422	-1.56403	1.55579	0.119759	0.241475	no
XLOC_021559	XLOC_021559	ISCW023761	DS953774:18233-18802	ISG	IL	OK	1.50823	1.02019	-0.564027	0.442668	0.658006	0.778328	no
XLOC_022216	XLOC_022216	ISCW023759	DS964770:217761-221578	ISG	IL	OK	16.7534	15.2549	-0.135184	0.144809	0.884862	0.932593	no
XLOC_022215	XLOC_022215	ISCW023758	DS964770:4257-8150	ISG	IL	OK	6.62928	1.01912	-2.70153	2.5462	0.0108904	0.0575322	no
XLOC_021118	XLOC_021118	ISCW023755	DS947323:253582-266555	ISG	IL	OK	2.60559	0	-1.79769e+308	-1.79769e+308	0.0293909	0.0878738	no
XLOC_020828	XLOC_020828	ISCW023752	DS942037:67292-84013	ISG	IL	OK	76.9237	2.95973	-4.69989	4.72736	2.27454e-06	0.000112821	yes	overexpressed in ISG
XLOC_020825	XLOC_020825	ISCW023751	DS942037:52279-62824	ISG	IL	OK	3.89641	5.12473	0.395331	-0.416743	0.676867	0.792788	no
XLOC_020826	XLOC_020826	ISCW023749	DS942037:10118-15921	ISG	IL	OK	0.319345	2.70011	3.07983	-1.88689	0.0591748	0.145545	no
XLOC_020424	XLOC_020424	ISCW023748	DS934994:602692-604502	ISG	IL	OK	2.10659	5.63074	1.41841	-1.51988	0.128541	0.254486	no
XLOC_020423	XLOC_020423	ISCW023745	DS934994:449318-480555	ISG	IL	OK	53.8256	4.20905	-3.67673	3.72934	0.000191981	0.00319341	yes	overexpressed in ISG
XLOC_020422	XLOC_020422	ISCW023744	DS934994:358776-370184	ISG	IL	OK	105.919	6.47394	-4.03218	3.76397	0.000167235	0.00291492	yes	overexpressed in ISG
XLOC_022361	XLOC_022361	ISCW023736	DS967246:144644-154606	ISG	IL	OK	10.2751	3.47508	-1.56403	1.59842	0.10995	0.22619	no
XLOC_022357	XLOC_022357	ISCW023735	DS967246:117497-141675	ISG	IL	OK	27.807	6.66039	-2.06177	2.1183	0.0341494	0.0986549	no
XLOC_022360	XLOC_022360	ISCW023734	DS967246:114369-115320	ISG	IL	OK	9.52462	1.73453	-2.45711	2.51555	0.0118846	0.0614689	no
XLOC_022356	XLOC_022356	ISCW023733	DS967246:94689-111691	ISG	IL	OK	1.17522	5.15232	2.1323	-2.27196	0.0230889	0.0770048	no
XLOC_020615	XLOC_020615	ISCW023728	DS938984:4991-50984	ISG	IL	OK	26.7705	4.62375	-2.53351	2.59635	0.00942207	0.0525581	no
XLOC_020950	XLOC_020950	ISCW023727	DS944088:352940-353324	ISG	IL	OK	25.7078	15.8082	-0.701531	0.730541	0.46506	0.615269	no
XLOC_020951	XLOC_020951	ISCW023726	DS944088:348948-350001	ISG	IL	OK	1.5461	0.653625	-1.2421	1.1551	0.248051	0.397666	no
XLOC_020949	XLOC_020949	ISCW023725	DS944088:342874-344225	ISG	IL	OK	7.39191	1.01351	-2.86659	2.70014	0.00693107	0.041773	yes	overexpressed in ISG
XLOC_020948	XLOC_020948	ISCW023724	DS944088:323242-330377	ISG	IL	OK	68.6448	5.04697	-3.76566	3.8369	0.000124596	0.00238962	yes	overexpressed in ISG
XLOC_020947	XLOC_020947	ISCW023723	DS944088:276567-277874	ISG	IL	OK	0	2.03371	1.79769e+308	1.79769e+308	0.158655	0.285968	no
XLOC_020946	XLOC_020946	ISCW023722	DS944088:183535-270135	ISG	IL	OK	35.2971	2.30614	-3.936	3.96887	7.22131e-05	0.0016176	yes	overexpressed in ISG
XLOC_020933	XLOC_020933	ISCW023721	DS943661:400313-426062	ISG	IL	OK	65.7772	1.58449	-5.3755	5.14414	2.68743e-07	2.02777e-05	yes	overexpressed in ISG
XLOC_020929	XLOC_020929	ISCW023719	DS943661:349102-367600	ISG	IL	OK	103.905	134.458	0.371892	-0.354469	0.722988	0.822777	no
XLOC_020931	XLOC_020931	ISCW023717	DS943661:294258-309604	ISG	IL	OK	32.3722	20.3993	-0.666239	0.686247	0.492558	0.641796	no
XLOC_020927	XLOC_020927	ISCW023716	DS943661:276334-288264	ISG	IL	OK	2.01831	7.22757	1.84036	-1.96168	0.0498001	0.127348	no
XLOC_020930	XLOC_020930	ISCW023714	DS943661:128635-210709	ISG	IL	OK	119.826	3.14405	-5.25217	5.17699	2.25491e-07	1.78356e-05	yes	overexpressed in ISG
XLOC_020926	XLOC_020926	ISCW023713	DS943661:121773-123639	ISG	IL	OK	29.6123	44.6347	0.591969	-0.582132	0.560478	0.701128	no
XLOC_021821	XLOC_021821	ISCW023707	DS959134:745702-751395	ISG	IL	OK	14.4915	6.01633	-1.26825	1.2941	0.195632	0.334137	no
XLOC_021817	XLOC_021817	ISCW023705	DS959134:646967-653300	ISG	IL	OK	1.60268	0	-1.79769e+308	-1.79769e+308	0.158655	0.285968	no
XLOC_022247	XLOC_022247	ISCW023702	DS965098:215499-217524	ISG	IL	OK	7.7887	5.16705	-0.592042	0.620031	0.535238	0.679805	no
XLOC_022242	XLOC_022242	ISCW023701	DS965098:213286-214600	ISG	IL	OK	2.17045	2.33035	0.102549	-0.108502	0.913597	0.947382	no
XLOC_022246	XLOC_022246	ISCW023700	DS965098:208571-213006	ISG	IL	OK	10.4474	63.2285	2.59744	-2.66524	0.00769334	0.0451561	yes	overexpressed in IL
XLOC_022245	XLOC_022245	ISCW023699	DS965098:204152-205220	ISG	IL	OK	339.035	5993.78	4.14396	-4.2899	1.78756e-05	0.000575886	yes	overexpressed in IL
XLOC_022244	XLOC_022244	ISCW023698	DS965098:192391-203004	ISG	IL	OK	19.692	9.40227	-1.06653	1.13147	0.257856	0.408755	no
XLOC_022241	XLOC_022241	ISCW023697	DS965098:185973-187181	ISG	IL	OK	5.22569	13.6234	1.38239	-1.46854	0.141958	0.274417	no
XLOC_022240	XLOC_022240	ISCW023696	DS965098:177319-184493	ISG	IL	OK	7.26915	1.36582	-2.41202	2.38992	0.0168522	0.0678946	no
XLOC_022239	XLOC_022239	ISCW023694	DS965098:47616-158344	ISG	IL	OK	1.02873	10.6572	3.3729	-3.37585	0.000735868	0.00854218	yes	overexpressed in IL
XLOC_020433	XLOC_020433	ISCW023690	DS935003:71688-81330	ISG	IL	OK	27.487	7.2064	-1.9314	2.02369	0.0430023	0.113747	no
XLOC_020432	XLOC_020432	ISCW023689	DS935003:50362-50734	ISG	IL	OK	5.84268	3.95205	-0.564027	0.442668	0.658006	0.778328	no
XLOC_020431	XLOC_020431	ISCW023688	DS935003:9017-40189	ISG	IL	OK	40.2827	111.957	1.47471	-1.36815	0.171266	0.301562	no
XLOC_020459	XLOC_020459	ISCW023683	DS935469:261990-670773	ISG	IL	OK	1.77524	1.39926	-0.343351	0.350081	0.726278	0.824884	no
XLOC_022500	XLOC_022500	ISCW023678	DS968865:1737138-1737375	ISG	IL	OK	4.73372	0	-1.79769e+308	-1.79769e+308	0.0786496	0.175622	no
XLOC_022499	XLOC_022499	ISCW023677	DS968865:1666649-1667929	ISG	IL	OK	3.57205	0	-1.79769e+308	-1.79769e+308	0.0786496	0.175622	no
XLOC_022494	XLOC_022494	ISCW023674	DS968865:1339829-1340321	ISG	IL	OK	0.766939	1.94537	1.34286	-1.01964	0.307898	0.464203	no
XLOC_022496	XLOC_022496	ISCW023672	DS968865:1323561-1323795	ISG	IL	OK	7.41889	12.5456	0.757901	-0.643404	0.519962	0.665861	no
XLOC_022492	XLOC_022492	ISCW023671	DS968865:1320856-1321348	ISG	IL	OK	1.15041	1.94537	0.757901	-0.643404	0.519962	0.665861	no
XLOC_022491	XLOC_022491	ISCW023670	DS968865:1272425-1274804	ISG	IL	OK	0.401145	2.45901	2.61588	-2.72588	0.00641309	0.0393325	yes	overexpressed in IL
XLOC_022489	XLOC_022489	ISCW023668	DS968865:1188227-1215672	ISG	IL	OK	2.48973	8.99454	1.85306	-1.98602	0.0470311	0.121843	no
XLOC_022495	XLOC_022495	ISCW023666	DS968865:1066485-1102194	ISG	IL	OK	5.35279	0.883095	-2.59965	2.70013	0.0069312	0.041773	yes	overexpressed in ISG
XLOC_022487	XLOC_022487	ISCW023665	DS968865:1062437-1064005	ISG	IL	OK	4.80286	59.5596	3.63237	-3.70704	0.000209695	0.00341134	yes	overexpressed in IL
XLOC_022485	XLOC_022485	ISCW023663	DS968865:858650-898705	ISG	IL	OK	1.73044	1.21926	-0.505134	0.494065	0.621261	0.748056	no
XLOC_022484	XLOC_022484	ISCW023662	DS968865:569942-576881	ISG	IL	OK	1.27206	9.03456	2.82829	-2.79808	0.00514077	0.0336527	yes	overexpressed in IL
XLOC_020962	XLOC_020962	ISCW023661	DS944282:142598-144531	ISG	IL	OK	72.1964	265.302	1.87764	-1.72724	0.0841247	0.185261	no
XLOC_020959	XLOC_020959	ISCW023660	DS944282:121662-128161	ISG	IL	OK	151.241	33.3591	-2.1807	2.16464	0.0304152	0.0902497	no
XLOC_020961	XLOC_020961	ISCW023659	DS944282:36758-37844	ISG	IL	OK	6.44792	4.40338	-0.550221	0.587313	0.556993	0.698481	no
XLOC_020958	XLOC_020958	ISCW023657	DS944282:11716-32408	ISG	IL	OK	5.83503	3.36929	-0.792296	0.839255	0.401326	0.557511	no
XLOC_020999	XLOC_020999	ISCW023656	DS945087:174760-188764	ISG	IL	OK	806.59	1121.91	0.47605	-0.459914	0.645578	0.769397	no
XLOC_020997	XLOC_020997	ISCW023655	DS945087:135667-163739	ISG	IL	OK	38.7424	6.22095	-2.6387	2.72081	0.00651231	0.0397114	yes	overexpressed in ISG
XLOC_020996	XLOC_020996	ISCW023654	DS945087:126497-132892	ISG	IL	OK	104.311	133.057	0.351154	-0.33303	0.739112	0.83442	no
XLOC_020995	XLOC_020995	ISCW023653	DS945087:77363-123775	ISG	IL	OK	51.4626	36.4416	-0.497938	0.502763	0.615131	0.746084	no
XLOC_020998	XLOC_020998	ISCW023652	DS945087:56030-57332	ISG	IL	OK	2.83404	0	-1.79769e+308	-1.79769e+308	0.0216541	0.0754501	no
XLOC_020994	XLOC_020994	ISCW023651	DS945087:16033-49357	ISG	IL	OK	1.19303	0.504362	-1.2421	1.26278	0.206668	0.345319	no
XLOC_021849	XLOC_021849	ISCW023649	DS959765:324551-340349	ISG	IL	OK	4.88103	2.87094	-0.765661	0.814394	0.415419	0.571894	no
XLOC_021847	XLOC_021847	ISCW023648	DS959765:306010-309704	ISG	IL	OK	36.4514	8.65335	-2.07464	2.10207	0.0355475	0.101518	no
XLOC_021846	XLOC_021846	ISCW023647	DS959765:277549-291574	ISG	IL	OK	10.753	2.52051	-2.09296	2.17956	0.0292905	0.0878738	no
XLOC_021845	XLOC_021845	ISCW023645	DS959765:191010-204107	ISG	IL	OK	1.11091	0.375715	-1.56403	1.26884	0.204497	0.343472	no
XLOC_022571	XLOC_022571	ISCW023638	DS969935:380842-407171	ISG	IL	OK	27.7569	0.584892	-5.56853	5.49722	3.85826e-08	4.42504e-06	yes	overexpressed in ISG
XLOC_022570	XLOC_022570	ISCW023637	DS969935:331931-352717	ISG	IL	OK	17.6749	0	-1.79769e+308	-1.79769e+308	0.0188705	0.0705669	no
XLOC_022569	XLOC_022569	ISCW023636	DS969935:217710-248736	ISG	IL	OK	8.07184	0	-1.79769e+308	-1.79769e+308	0.0160491	0.0672943	no
XLOC_022565	XLOC_022565	ISCW023633	DS969935:150139-181676	ISG	IL	OK	2.98846	0	-1.79769e+308	-1.79769e+308	0.0141975	0.066059	no
XLOC_022567	XLOC_022567	ISCW023632	DS969935:127888-128785	ISG	IL	OK	6.47879	0.53443	-3.59965	2.96362	0.00304042	0.023383	yes	overexpressed in ISG
XLOC_021104	XLOC_021104	ISCW023629	DS946879:196543-213088	ISG	IL	OK	39.3479	4.60328	-3.09555	3.18298	0.00145767	0.0139433	yes	overexpressed in ISG
XLOC_021103	XLOC_021103	ISCW023628	DS946879:187130-189565	ISG	IL	OK	14.7275	28.8487	0.969995	-0.964042	0.335025	0.491355	no
XLOC_021101	XLOC_021101	ISCW023627	DS946879:184309-185924	ISG	IL	OK	3.01756	7.7196	1.35514	-1.44866	0.147432	0.282099	no
XLOC_021100	XLOC_021100	ISCW023626	DS946879:161915-182920	ISG	IL	OK	5.01926	1.01044	-2.31249	2.29176	0.0219195	0.0761572	no
XLOC_021102	XLOC_021102	ISCW023625	DS946879:1753-91038	ISG	IL	OK	5.47695	1.0716	-2.35361	2.44373	0.0145364	0.066059	no
XLOC_022100	XLOC_022100	ISCW023621	DS963588:594742-599506	ISG	IL	OK	1.25324	9.00686	2.84536	-2.9666	0.00301117	0.0233819	yes	overexpressed in IL
XLOC_022099	XLOC_022099	ISCW023620	DS963588:587126-591984	ISG	IL	OK	0.19016	8.19995	5.43033	-4.46611	7.9655e-06	0.000310736	yes	overexpressed in IL
XLOC_022097	XLOC_022097	ISCW023618	DS963588:540144-543462	ISG	IL	OK	6.33724	6.79062	0.0996894	-0.104712	0.916604	0.949306	no
XLOC_022090	XLOC_022090	ISCW023612	DS963588:380389-381538	ISG	IL	OK	2.99644	0.211128	-3.82706	2.41322	0.0158121	0.0672943	no
XLOC_022087	XLOC_022087	ISCW023606	DS963588:2505-11336	ISG	IL	OK	2.55007	3.4498	0.435973	-0.443456	0.657436	0.778328	no
XLOC_021066	XLOC_021066	ISCW023605	DS946260:67418-104583	ISG	IL	OK	12.1324	0.820651	-3.88596	3.9628	7.40755e-05	0.00164339	yes	overexpressed in ISG
XLOC_021065	XLOC_021065	ISCW023604	DS946260:54699-60565	ISG	IL	OK	13.5344	0.995092	-3.76566	2.37304	0.0176425	0.0689517	no
XLOC_021064	XLOC_021064	ISCW023603	DS946260:1794-2557	ISG	IL	OK	108.09	30.4639	-1.82706	1.89047	0.058695	0.145143	no
XLOC_022382	XLOC_022382	ISCW023601	DS967510:125745-166383	ISG	IL	OK	77.3518	5.35179	-3.85334	3.78924	0.000151108	0.00269109	yes	overexpressed in ISG
XLOC_022380	XLOC_022380	ISCW023600	DS967510:78578-104130	ISG	IL	OK	3.37474	0.608867	-2.47058	2.53669	0.0111907	0.0587128	no
XLOC_022381	XLOC_022381	ISCW023598	DS967510:15024-56788	ISG	IL	OK	15.997	7.7875	-1.03857	1.03536	0.300499	0.4566	no
XLOC_022378	XLOC_022378	ISCW023597	DS967510:13319-14623	ISG	IL	OK	5.14199	4.74286	-0.116568	0.114162	0.909109	0.944436	no
XLOC_022377	XLOC_022377	ISCW023596	DS967510:4275-10840	ISG	IL	OK	1.24128	0.299862	-2.04945	1.2732	0.202947	0.342495	no
XLOC_021461	XLOC_021461	ISCW023594	DS952600:273159-320924	ISG	IL	OK	29.8682	9.01615	-1.72803	1.7332	0.083061	0.183409	no
XLOC_021464	XLOC_021464	ISCW023593	DS952600:237701-261975	ISG	IL	OK	7.56213	2.57818	-1.55244	1.60606	0.10826	0.224	no
XLOC_021460	XLOC_021460	ISCW023592	DS952600:210275-217022	ISG	IL	OK	1.65246	0	-1.79769e+308	-1.79769e+308	0.0194737	0.0705669	no
XLOC_021463	XLOC_021463	ISCW023591	DS952600:184652-207427	ISG	IL	OK	108.481	44.7582	-1.27722	1.20506	0.22818	0.37343	no
XLOC_021462	XLOC_021462	ISCW023590	DS952600:173933-175993	ISG	IL	OK	42.9687	92.9389	1.113	-1.06291	0.287823	0.442203	no
XLOC_021459	XLOC_021459	ISCW023589	DS952600:136861-173294	ISG	IL	OK	21.078	2.42024	-3.12252	3.19582	0.00139432	0.0134863	yes	overexpressed in ISG
XLOC_021458	XLOC_021458	ISCW023587	DS952600:63248-111814	ISG	IL	OK	90.1262	2.68193	-5.0706	4.92543	8.41765e-07	5.21849e-05	yes	overexpressed in ISG
XLOC_020548	XLOC_020548	ISCW023586	DS937434:150335-170854	ISG	IL	OK	71.0459	6.10172	-3.54147	3.60874	0.00030769	0.00451265	yes	overexpressed in ISG
XLOC_020554	XLOC_020554	ISCW023585	DS937434:137404-149072	ISG	IL	OK	90.705	50.2288	-0.852666	0.836931	0.402631	0.55902	no
XLOC_020547	XLOC_020547	ISCW023584	DS937434:125412-137120	ISG	IL	OK	278.768	167.724	-0.732972	0.698844	0.484649	0.63307	no
XLOC_020551	XLOC_020551	ISCW023580	DS937434:59334-79184	ISG	IL	OK	9.66836	14.6759	0.602106	-0.620573	0.534881	0.679503	no
XLOC_020550	XLOC_020550	ISCW023579	DS937434:51819-52629	ISG	IL	OK	4.1598	0	-1.79769e+308	-1.79769e+308	0.0145156	0.066059	no
XLOC_020545	XLOC_020545	ISCW023578	DS937434:39886-46219	ISG	IL	OK	5.89096	0.34351	-4.10008	2.58565	0.00971969	0.0533119	no
XLOC_020549	XLOC_020549	ISCW023577	DS937434:18491-39430	ISG	IL	OK	32.0352	18.4096	-0.799202	0.806706	0.419836	0.576106	no
XLOC_020544	XLOC_020544	ISCW023576	DS937434:10759-14907	ISG	IL	OK	9.98761	50.1232	2.32727	-2.46477	0.0137103	0.066059	no
XLOC_020543	XLOC_020543	ISCW023575	DS937434:5929-9206	ISG	IL	OK	0	58.5929	1.79769e+308	1.79769e+308	0.0194737	0.0705669	no
XLOC_022166	XLOC_022166	ISCW023565	DS964264:600103-939474	ISG	IL	OK	2.45309	11.8065	2.26691	-2.40429	0.0162037	0.0672943	no
XLOC_022165	XLOC_022165	ISCW023564	DS964264:596637-597009	ISG	IL	OK	1.32587	0	-1.79769e+308	-1.79769e+308	0.0786496	0.175622	no
XLOC_022164	XLOC_022164	ISCW023563	DS964264:595657-596591	ISG	IL	OK	1.34968	0	-1.79769e+308	-1.79769e+308	0.0194737	0.0705669	no
XLOC_020834	XLOC_020834	ISCW023560	DS942119:224969-246968	ISG	IL	OK	172.501	240.519	0.479545	-0.453474	0.650207	0.77261	no
XLOC_020839	XLOC_020839	ISCW023559	DS942119:202714-224215	ISG	IL	OK	14.0279	2.69563	-2.3796	2.46081	0.0138624	0.066059	no
XLOC_020833	XLOC_020833	ISCW023558	DS942119:200725-202329	ISG	IL	OK	5.92672	7.64856	0.367954	-0.389899	0.696611	0.805062	no
XLOC_020832	XLOC_020832	ISCW023557	DS942119:193294-199143	ISG	IL	OK	6.97381	1.84003	-1.92222	2.01335	0.0440774	0.116212	no
XLOC_020837	XLOC_020837	ISCW023555	DS942119:103695-160431	ISG	IL	OK	8.86329	1.52304	-2.54089	2.6026	0.00925199	0.051711	no
XLOC_020831	XLOC_020831	ISCW023553	DS942119:32149-33280	ISG	IL	OK	2.7129	5.18597	0.934779	-1.00169	0.316493	0.473378	no
XLOC_020830	XLOC_020830	ISCW023551	DS942119:19394-25375	ISG	IL	OK	6.10968	24.3532	1.99494	-2.12954	0.0332094	0.0963518	no
XLOC_021212	XLOC_021212	ISCW023547	DS948253:391927-414198	ISG	IL	OK	0	2.14394	1.79769e+308	1.79769e+308	0.0194336	0.0705669	no
XLOC_021211	XLOC_021211	ISCW023545	DS948253:326841-343317	ISG	IL	OK	0	10.8407	1.79769e+308	1.79769e+308	0.0227501	0.0762482	no
XLOC_021210	XLOC_021210	ISCW023543	DS948253:263443-302572	ISG	IL	OK	2.80724	1.35632	-1.04945	1.06175	0.288348	0.442535	no
XLOC_021214	XLOC_021214	ISCW023542	DS948253:261077-262697	ISG	IL	OK	3.93246	2.60755	-0.592738	0.633475	0.526424	0.670765	no
XLOC_022325	XLOC_022325	ISCW023539	DS966815:85481-114596	ISG	IL	OK	6.54663	5.93472	-0.141572	0.149269	0.881341	0.929823	no
XLOC_022326	XLOC_022326	ISCW023537	DS966815:32636-83367	ISG	IL	OK	8.50778	3.15042	-1.43324	1.50357	0.132693	0.260146	no
XLOC_020476	XLOC_020476	ISCW023533	DS935743:105084-160111	ISG	IL	OK	1.08127	2.2735	1.07218	-1.14955	0.25033	0.400617	no
XLOC_020471	XLOC_020471	ISCW023532	DS935743:83624-95143	ISG	IL	OK	9.64678	7.62685	-0.338961	0.360512	0.718464	0.818848	no
XLOC_020475	XLOC_020475	ISCW023531	DS935743:56841-78685	ISG	IL	OK	1.86437	0.630539	-1.56403	1.26884	0.204497	0.343472	no
XLOC_021637	XLOC_021637	ISCW023527	DS955324:247587-251949	ISG	IL	OK	0	4.10714	1.79769e+308	1.79769e+308	0.0786496	0.175622	no
XLOC_021636	XLOC_021636	ISCW023524	DS955324:52408-53415	ISG	IL	OK	98.9185	8.3637	-3.56403	2.9344	0.00334189	0.0250183	yes	overexpressed in ISG
XLOC_020379	XLOC_020379	ISCW023522	DS933956:161397-173359	ISG	IL	OK	9.34999	7.44052	-0.329562	0.340945	0.733145	0.830027	no
XLOC_020378	XLOC_020378	ISCW023521	DS933956:104573-144242	ISG	IL	OK	12.8314	51.3115	1.99961	-2.00635	0.0448186	0.11782	no
XLOC_020377	XLOC_020377	ISCW023520	DS933956:67864-80261	ISG	IL	OK	4.41158	1.49202	-1.56403	1.55189	0.120689	0.242267	no
XLOC_020376	XLOC_020376	ISCW023518	DS933956:7339-36990	ISG	IL	OK	9.34272	1.16412	-3.0046	3.05136	0.00227805	0.0190708	yes	overexpressed in ISG
XLOC_021346	XLOC_021346	ISCW023517	DS950791:47059-50130	ISG	IL	OK	0.107578	2.72875	4.66479	-2.93004	0.00338917	0.0251589	yes	overexpressed in IL
XLOC_021345	XLOC_021345	ISCW023516	DS950791:5047-15792	ISG	IL	OK	21.4061	5.30178	-2.01347	2.09714	0.0359813	0.102399	no
XLOC_022624	XLOC_022624	ISCW023508	DS970712:522739-547482	ISG	IL	OK	6.53794	118.657	4.18182	-4.16259	3.14657e-05	0.000841213	yes	overexpressed in IL
XLOC_022615	XLOC_022615	ISCW023507	DS970712:496561-511341	ISG	IL	OK	15.5797	1.13141	-3.78347	3.7989	0.00014534	0.00264169	yes	overexpressed in ISG
XLOC_022623	XLOC_022623	ISCW023506	DS970712:456834-470117	ISG	IL	OK	43.6027	61.105	0.486874	-0.495608	0.620171	0.747987	no
XLOC_022614	XLOC_022614	ISCW023505	DS970712:442121-451429	ISG	IL	OK	2.26262	1.80054	-0.329562	0.340945	0.733145	0.830027	no
XLOC_022622	XLOC_022622	ISCW023504	DS970712:393695-438893	ISG	IL	OK	1.24876	0	-1.79769e+308	-1.79769e+308	0.017132	0.0678946	no
XLOC_022621	XLOC_022621	ISCW023501	DS970712:308202-392120	ISG	IL	OK	10.2038	0	-1.79769e+308	-1.79769e+308	0.0288898	0.0878738	no
XLOC_022620	XLOC_022620	ISCW023500	DS970712:265147-285858	ISG	IL	OK	17.3925	2.64702	-2.71603	2.78586	0.00533854	0.0347268	yes	overexpressed in ISG
XLOC_022612	XLOC_022612	ISCW023498	DS970712:185984-208043	ISG	IL	OK	4.7616	5.13315	0.108398	-0.114917	0.908511	0.944413	no
XLOC_021684	XLOC_021684	ISCW023496	DS956364:46653-69194	ISG	IL	OK	4.1272	0.155094	-4.73395	2.98378	0.00284707	0.0223651	yes	overexpressed in ISG
XLOC_021683	XLOC_021683	ISCW023495	DS956364:195-13342	ISG	IL	OK	214.601	2.34127	-6.51822	5.91452	3.32851e-09	5.78404e-07	yes	overexpressed in ISG
XLOC_020842	XLOC_020842	ISCW023485	DS942176:91227-94050	ISG	IL	OK	11.4448	13.575	0.246255	-0.250067	0.802535	0.879573	no
XLOC_021248	XLOC_021248	ISCW023482	DS948692:372121-372538	ISG	IL	OK	14.0702	0.881225	-3.99699	2.52019	0.011729	0.0608688	no
XLOC_021250	XLOC_021250	ISCW023480	DS948692:106025-108691	ISG	IL	OK	1.84603	0	-1.79769e+308	-1.79769e+308	0.0227501	0.0762482	no
XLOC_021651	XLOC_021651	ISCW023477	DS955679:418335-419497	ISG	IL	OK	191.491	242.959	0.343436	-0.3188	0.749878	0.841589	no
XLOC_021650	XLOC_021650	ISCW023476	DS955679:373636-403212	ISG	IL	OK	1.37121	0.100815	-3.76566	2.37304	0.0176425	0.0689517	no
XLOC_021649	XLOC_021649	ISCW023475	DS955679:330507-338381	ISG	IL	OK	2.81461	12.9461	2.20151	-2.34876	0.0188363	0.0705669	no
XLOC_021648	XLOC_021648	ISCW023474	DS955679:278660-296596	ISG	IL	OK	45.9928	1.93301	-4.57249	4.60699	4.08536e-06	0.000179521	yes	overexpressed in ISG
XLOC_021647	XLOC_021647	ISCW023473	DS955679:262351-270169	ISG	IL	OK	85.2069	8.00485	-3.41202	2.81008	0.00495292	0.0329878	yes	overexpressed in ISG
XLOC_022332	XLOC_022332	ISCW023469	DS967025:47184-47717	ISG	IL	OK	1.40135	1.18486	-0.242099	0.137017	0.891018	0.93453	no
XLOC_022641	XLOC_022641	ISCW023462	DS971214:124251-139521	ISG	IL	OK	12.7781	1.40922	-3.1807	2.99146	0.00277649	0.0219579	yes	overexpressed in ISG
XLOC_022640	XLOC_022640	ISCW023461	DS971214:116998-119092	ISG	IL	OK	9.58168	32.8938	1.77947	-1.78805	0.0737679	0.17196	no
XLOC_022639	XLOC_022639	ISCW023460	DS971214:86582-107783	ISG	IL	OK	4.93242	7.10517	0.526575	-0.564318	0.572538	0.711132	no
XLOC_022637	XLOC_022637	ISCW023458	DS971214:14378-48607	ISG	IL	OK	6.85507	0.828008	-3.04945	3.00119	0.00268931	0.0215156	yes	overexpressed in ISG
XLOC_021988	XLOC_021988	ISCW023453	DS961919:750458-818589	ISG	IL	OK	3.70576	106.049	4.83882	-4.9699	6.69864e-07	4.45325e-05	yes	overexpressed in IL
XLOC_021977	XLOC_021977	ISCW023450	DS961919:726018-726192	ISG	IL	OK	38.3506	77.8223	1.02094	-0.94753	0.343369	0.498493	no
XLOC_021986	XLOC_021986	ISCW023449	DS961919:692832-693750	ISG	IL	OK	1.99667	0	-1.79769e+308	-1.79769e+308	0.0161527	0.0672943	no
XLOC_021976	XLOC_021976	ISCW023448	DS961919:667419-684272	ISG	IL	OK	4.04863	0.684635	-2.56403	1.60249	0.109047	0.224818	no
XLOC_021985	XLOC_021985	ISCW023447	DS961919:632754-633153	ISG	IL	OK	2.85036	0	-1.79769e+308	-1.79769e+308	0.0293909	0.0878738	no
XLOC_021974	XLOC_021974	ISCW023444	DS961919:550792-575056	ISG	IL	OK	1.65992	1.05262	-0.657137	0.684428	0.493705	0.642713	no
XLOC_021983	XLOC_021983	ISCW023443	DS961919:311888-326720	ISG	IL	OK	43.4399	797.12	4.1977	-4.06716	4.75888e-05	0.00116396	yes	overexpressed in IL
XLOC_021982	XLOC_021982	ISCW023442	DS961919:243335-247280	ISG	IL	OK	206.306	376.778	0.868932	-0.933257	0.350687	0.506107	no
XLOC_021981	XLOC_021981	ISCW023441	DS961919:223795-237284	ISG	IL	OK	5.65551	203.779	5.1712	-5.16407	2.41641e-07	1.84758e-05	yes	overexpressed in IL
XLOC_021509	XLOC_021509	ISCW023434	DS953309:191903-198919	ISG	IL	OK	11.3875	13.8513	0.282563	-0.302124	0.762558	0.85026	no
XLOC_021508	XLOC_021508	ISCW023433	DS953309:156340-163764	ISG	IL	OK	85.2843	16.927	-2.33295	2.4269	0.0152285	0.0668948	no
XLOC_021503	XLOC_021503	ISCW023432	DS953309:134102-150187	ISG	IL	OK	6.08188	0.44077	-3.78642	3.5453	0.000392165	0.00538651	yes	overexpressed in ISG
XLOC_021507	XLOC_021507	ISCW023431	DS953309:127172-129741	ISG	IL	OK	4.9914	0.791306	-2.65714	2.50325	0.0123059	0.0628009	no
XLOC_021506	XLOC_021506	ISCW023430	DS953309:81028-92439	ISG	IL	OK	6.26765	2.11975	-1.56403	1.61061	0.107264	0.222381	no
XLOC_021505	XLOC_021505	ISCW023428	DS953309:49016-75463	ISG	IL	OK	4.48129	0.653275	-2.77815	2.74633	0.00602667	0.0376296	yes	overexpressed in ISG
XLOC_021504	XLOC_021504	ISCW023426	DS953309:11472-35422	ISG	IL	OK	2.85414	4.13694	0.535508	-0.575541	0.564926	0.704867	no
XLOC_020811	XLOC_020811	ISCW023425	DS941865:165268-173274	ISG	IL	OK	64.63	78.043	0.272066	-0.255135	0.798619	0.876661	no
XLOC_020810	XLOC_020810	ISCW023424	DS941865:15946-48318	ISG	IL	OK	42.5479	21.833	-0.962577	0.955241	0.339456	0.494774	no
XLOC_020591	XLOC_020591	ISCW023423	DS938623:265809-266808	ISG	IL	OK	3.44098	3.95678	0.201508	-0.214875	0.829865	0.897484	no
XLOC_020590	XLOC_020590	ISCW023419	DS938623:213863-265433	ISG	IL	OK	5.60971	1.20459	-2.21938	2.2035	0.0275595	0.0869785	no
XLOC_022675	XLOC_022675	ISCW023418	DS971510:36374-57859	ISG	IL	OK	0	3.80696	1.79769e+308	1.79769e+308	0.0182669	0.070178	no
XLOC_022159	XLOC_022159	ISCW023412	DS964105:101568-102146	ISG	IL	OK	0	4.18185	1.79769e+308	1.79769e+308	0.158655	0.285968	no
XLOC_022157	XLOC_022157	ISCW023411	DS964105:62972-63967	ISG	IL	OK	0.138339	29.4758	7.73518	-4.84005	1.29807e-06	7.29785e-05	yes	overexpressed in IL
XLOC_021286	XLOC_021286	ISCW023402	DS949082:135783-136083	ISG	IL	OK	9.08833	0	-1.79769e+308	-1.79769e+308	0.0194336	0.0705669	no
XLOC_021285	XLOC_021285	ISCW023401	DS949082:116707-119039	ISG	IL	OK	19.924	11.2307	-0.827062	0.834238	0.404147	0.560275	no
XLOC_021280	XLOC_021280	ISCW023399	DS949082:79457-92708	ISG	IL	OK	335.094	168.003	-0.996081	0.987743	0.323278	0.478534	no
XLOC_021284	XLOC_021284	ISCW023398	DS949082:35400-45517	ISG	IL	OK	6.36522	0.672736	-3.2421	3.04853	0.00229962	0.0191535	yes	overexpressed in ISG
XLOC_021279	XLOC_021279	ISCW023397	DS949082:25707-27463	ISG	IL	OK	117.513	64.099	-0.874454	0.8277	0.40784	0.563896	no
XLOC_020581	XLOC_020581	ISCW023394	DS938188:79302-87012	ISG	IL	OK	7.58308	11.3984	0.587976	-0.595148	0.551745	0.693745	no
XLOC_020583	XLOC_020583	ISCW023393	DS938188:40745-60509	ISG	IL	OK	13.932	23.9984	0.784536	-0.779689	0.435574	0.590825	no
XLOC_020580	XLOC_020580	ISCW023392	DS938188:37910-40070	ISG	IL	OK	1.0512	4.0631	1.95055	-1.994	0.0461523	0.120382	no
XLOC_020582	XLOC_020582	ISCW023391	DS938188:23323-32562	ISG	IL	OK	16.2429	30.4587	0.907044	-0.940394	0.347016	0.502274	no
XLOC_020812	XLOC_020812	ISCW023388	DS941880:22005-28927	ISG	IL	OK	67.4434	0	-1.79769e+308	-1.79769e+308	0.0162581	0.0672943	no
XLOC_020813	XLOC_020813	ISCW023387	DS941880:10073-18203	ISG	IL	OK	11.1971	3.78691	-1.56403	1.62857	0.103404	0.216135	no
XLOC_021699	XLOC_021699	ISCW023384	DS956654:371459-371887	ISG	IL	OK	0.990165	271.252	8.09775	-6.51097	7.46661e-11	2.37874e-08	yes	overexpressed in IL
XLOC_021694	XLOC_021694	ISCW023383	DS956654:364325-371345	ISG	IL	OK	0.0921815	10.2882	6.8023	-4.27977	1.87088e-05	0.000596033	yes	overexpressed in IL
XLOC_021697	XLOC_021697	ISCW023380	DS956654:1884-6369	ISG	IL	OK	32.5192	25.878	-0.329562	0.338132	0.735264	0.831631	no
XLOC_021413	XLOC_021413	ISCW023378	DS951653:48761-53006	ISG	IL	OK	0.29834	2.5225	3.07983	-1.88689	0.0591748	0.145545	no
XLOC_021410	XLOC_021410	ISCW023376	DS951653:26020-41742	ISG	IL	OK	3.98447	2.77441	-0.522207	0.553929	0.579627	0.717125	no
XLOC_021412	XLOC_021412	ISCW023375	DS951653:11260-11531	ISG	IL	OK	0	3.83436	1.79769e+308	1.79769e+308	0.158655	0.285968	no
XLOC_021409	XLOC_021409	ISCW023374	DS951653:10214-10550	ISG	IL	OK	16.8513	8.5488	-0.979065	0.971686	0.331207	0.487064	no
XLOC_020846	XLOC_020846	ISCW023373	DS942248:286366-342206	ISG	IL	OK	0.736615	3.02512	2.03801	-2.16181	0.0306328	0.0907356	no
XLOC_020849	XLOC_020849	ISCW023371	DS942248:148386-191481	ISG	IL	OK	28.5986	50.2656	0.813629	-0.788843	0.430204	0.585848	no
XLOC_020845	XLOC_020845	ISCW023370	DS942248:128925-139003	ISG	IL	OK	11.9544	10.9865	-0.121805	0.130614	0.896081	0.935876	no
XLOC_020848	XLOC_020848	ISCW023369	DS942248:117359-118860	ISG	IL	OK	134.597	0	-1.79769e+308	-1.79769e+308	0.0163813	0.0672943	no
XLOC_020847	XLOC_020847	ISCW023368	DS942248:34088-44713	ISG	IL	OK	3.22262	0.0939288	-5.10052	1.72347	0.0848029	0.186376	no
XLOC_022121	XLOC_022121	ISCW023358	DS963675:231426-232044	ISG	IL	OK	7.70195	3.59289	-1.10008	1.14634	0.251656	0.402207	no
XLOC_022128	XLOC_022128	ISCW023357	DS963675:229371-229560	ISG	IL	OK	191.584	148.102	-0.371382	0.395797	0.692255	0.802047	no
XLOC_022127	XLOC_022127	ISCW023356	DS963675:139637-139808	ISG	IL	OK	57.7656	55.819	-0.049454	0.048727	0.961137	0.97519	no
XLOC_022126	XLOC_022126	ISCW023355	DS963675:70596-88695	ISG	IL	OK	30.3368	30.927	0.0277971	-0.0277984	0.977823	0.987292	no
XLOC_022120	XLOC_022120	ISCW023354	DS963675:49952-62403	ISG	IL	OK	5.13724	2.64753	-0.956345	1.00945	0.312757	0.469565	no
XLOC_022119	XLOC_022119	ISCW023353	DS963675:30118-49414	ISG	IL	OK	33.1018	22.3479	-0.566773	0.577531	0.563581	0.703479	no
XLOC_022125	XLOC_022125	ISCW023352	DS963675:30118-49414	ISG	IL	OK	3.78462	0.63999	-2.56403	2.41604	0.0156902	0.0672943	no
XLOC_022124	XLOC_022124	ISCW023350	DS963675:4521-16967	ISG	IL	OK	66.6933	155.637	1.22257	-1.26187	0.206995	0.345665	no
XLOC_021937	XLOC_021937	ISCW023348	DS961460:104889-110437	ISG	IL	OK	22.63	26.3676	0.220528	-0.226218	0.821032	0.891368	no
XLOC_021939	XLOC_021939	ISCW023346	DS961460:37162-104227	ISG	IL	OK	5.83902	7.40546	0.342863	-0.339234	0.734434	0.831184	no
XLOC_021935	XLOC_021935	ISCW023345	DS961460:5592-36522	ISG	IL	OK	6.59421	4.25756	-0.631171	0.664559	0.506332	0.654785	no
XLOC_020332	XLOC_020332	ISCW023344	DS932557:1191-58260	ISG	IL	OK	0.628585	2.97627	2.24333	-2.20039	0.0277794	0.0875107	no
XLOC_022561	XLOC_022561	ISCW023338	DS969850:65834-178767	ISG	IL	OK	20.115	9.22943	-1.12396	1.07193	0.283752	0.437766	no
XLOC_022141	XLOC_022141	ISCW023335	DS963765:6794-182957	ISG	IL	OK	2.11858	0.0546959	-5.27552	4.28603	1.81897e-05	0.00058273	yes	overexpressed in ISG
XLOC_020569	XLOC_020569	ISCW023334	DS937734:44612-50722	ISG	IL	OK	3654	14292.3	1.96769	-1.54022	0.123506	0.246484	no
XLOC_020486	XLOC_020486	ISCW023333	DS935894:558520-559584	ISG	IL	OK	0.141027	2.38481	4.07983	-2.54985	0.0107769	0.0573284	no
XLOC_020588	XLOC_020588	ISCW023327	DS938469:147116-164272	ISG	IL	OK	1.25529	1.06136	-0.242099	0.193771	0.846355	0.907957	no
XLOC_021727	XLOC_021727	ISCW023325	DS957126:565784-603712	ISG	IL	OK	4.77678	1.04228	-2.1963	2.27722	0.0227733	0.0763036	no
XLOC_021730	XLOC_021730	ISCW023319	DS957126:75670-141093	ISG	IL	OK	3.22955	3.06363	-0.0760892	0.0806587	0.935713	0.96188	no
XLOC_021723	XLOC_021723	ISCW023318	DS957126:70720-71788	ISG	IL	OK	3.79783	2.35482	-0.689558	0.728113	0.466544	0.616735	no
XLOC_021729	XLOC_021729	ISCW023317	DS957126:61824-68322	ISG	IL	OK	117.76	59.9548	-0.973903	0.984262	0.324987	0.480319	no
XLOC_021722	XLOC_021722	ISCW023316	DS957126:43216-54497	ISG	IL	OK	8.65488	1.73317	-2.3201	2.39517	0.0166125	0.0678946	no
XLOC_021728	XLOC_021728	ISCW023315	DS957126:11143-17939	ISG	IL	OK	23.5169	19.5811	-0.264238	0.271202	0.786236	0.868974	no
XLOC_021807	XLOC_021807	ISCW023312	DS959025:588722-590099	ISG	IL	OK	6.79834	6.45676	-0.0743717	0.0791467	0.936916	0.962685	no
XLOC_021814	XLOC_021814	ISCW023311	DS959025:442720-466585	ISG	IL	OK	9.41091	2.32889	-2.01469	2.04465	0.0408897	0.11081	no
XLOC_021806	XLOC_021806	ISCW023310	DS959025:432521-432926	ISG	IL	OK	16.5835	24.304	0.55145	-0.592377	0.553598	0.695195	no
XLOC_021813	XLOC_021813	ISCW023309	DS959025:422996-424376	ISG	IL	OK	12.8188	2.67034	-2.26316	2.35576	0.0184848	0.070178	no
XLOC_021812	XLOC_021812	ISCW023308	DS959025:409141-418954	ISG	IL	OK	12.975	9.46477	-0.455093	0.487336	0.626021	0.752208	no
XLOC_021811	XLOC_021811	ISCW023307	DS959025:321322-396478	ISG	IL	OK	8.66052	0.446801	-4.27675	4.29644	1.73567e-05	0.00056775	yes	overexpressed in ISG
XLOC_021804	XLOC_021804	ISCW023304	DS959025:271921-278190	ISG	IL	OK	5.23848	1.15545	-2.1807	2.16464	0.0304152	0.0902497	no
XLOC_021808	XLOC_021808	ISCW023302	DS959025:30627-39132	ISG	IL	OK	0.225901	3.82005	4.07983	-2.54985	0.0107769	0.0573284	no
XLOC_021182	XLOC_021182	ISCW023301	DS947863:284870-293274	ISG	IL	OK	30.069	6.42578	-2.22633	2.31787	0.0204567	0.0730895	no
XLOC_021176	XLOC_021176	ISCW023299	DS947863:264117-283207	ISG	IL	OK	6636.1	11903.2	0.842945	-0.630378	0.528447	0.672895	no
XLOC_021181	XLOC_021181	ISCW023297	DS947863:246472-263856	ISG	IL	OK	64.4745	35.7137	-0.852254	0.810625	0.417581	0.57364	no
XLOC_021174	XLOC_021174	ISCW023296	DS947863:210129-242774	ISG	IL	OK	50.7403	49.6619	-0.0309914	0.0297136	0.976295	0.986318	no
XLOC_021180	XLOC_021180	ISCW023295	DS947863:175892-196818	ISG	IL	OK	23.9299	3.99863	-2.58124	2.67656	0.00743828	0.0440194	yes	overexpressed in ISG
XLOC_021173	XLOC_021173	ISCW023294	DS947863:174084-175699	ISG	IL	OK	5.80301	10.2056	0.814484	-0.858318	0.390717	0.546747	no
XLOC_021172	XLOC_021172	ISCW023293	DS947863:149193-172013	ISG	IL	OK	50.925	12.8402	-1.98771	1.92345	0.0544231	0.136971	no
XLOC_021171	XLOC_021171	ISCW023292	DS947863:144157-145002	ISG	IL	OK	13.5028	5.78066	-1.22395	1.29837	0.194159	0.332607	no
XLOC_021178	XLOC_021178	ISCW023289	DS947863:85034-91007	ISG	IL	OK	45.9297	71.0933	0.630287	-0.623842	0.532731	0.677597	no
XLOC_021169	XLOC_021169	ISCW023288	DS947863:72429-84537	ISG	IL	OK	3.04755	6.72818	1.14256	-1.22505	0.220556	0.363181	no
XLOC_021177	XLOC_021177	ISCW023286	DS947863:9218-50088	ISG	IL	OK	6.45605	1.71657	-1.91113	1.99868	0.0456427	0.119384	no
XLOC_020513	XLOC_020513	ISCW023285	DS936446:212800-247748	ISG	IL	OK	39.2095	26.2386	-0.579512	0.565218	0.571926	0.711125	no
XLOC_020512	XLOC_020512	ISCW023284	DS936446:107575-189405	ISG	IL	OK	6.92618	3.44246	-1.00862	1.03279	0.301701	0.458185	no
XLOC_020511	XLOC_020511	ISCW023283	DS936446:66642-89471	ISG	IL	OK	1357.59	110.382	-3.62048	3.37528	0.000737414	0.00855146	yes	overexpressed in ISG
XLOC_020510	XLOC_020510	ISCW023282	DS936446:7016-7416	ISG	IL	OK	4.53694	0	-1.79769e+308	-1.79769e+308	0.0194336	0.0705669	no
XLOC_021609	XLOC_021609	ISCW023278	DS954809:1175666-1176014	ISG	IL	OK	0	2.61584	1.79769e+308	1.79769e+308	0.0786496	0.175622	no
XLOC_021602	XLOC_021602	ISCW023269	DS954809:226079-226472	ISG	IL	OK	0	7.96074	1.79769e+308	1.79769e+308	0.0194336	0.0705669	no
XLOC_021708	XLOC_021708	ISCW023266	DS957018:374566-374881	ISG	IL	OK	3.97847	0	-1.79769e+308	-1.79769e+308	0.0227501	0.0762482	no
XLOC_021707	XLOC_021707	ISCW023265	DS957018:361788-366714	ISG	IL	OK	3.82636	3.82347	-0.00109102	0.00115647	0.999077	0.999164	no
XLOC_021713	XLOC_021713	ISCW023264	DS957018:348721-360388	ISG	IL	OK	15.3448	23.0312	0.58584	-0.597069	0.550461	0.693305	no
XLOC_021706	XLOC_021706	ISCW023262	DS957018:304247-306564	ISG	IL	OK	3.74467	0.678466	-2.46449	2.44238	0.014591	0.066059	no
XLOC_021705	XLOC_021705	ISCW023261	DS957018:282669-291346	ISG	IL	OK	5.38628	1.30119	-2.04945	2.0993	0.0357905	0.101958	no
XLOC_021711	XLOC_021711	ISCW023260	DS957018:266186-279167	ISG	IL	OK	6.49313	16.2562	1.324	-1.38136	0.16717	0.295647	no
XLOC_021710	XLOC_021710	ISCW023258	DS957018:248332-251901	ISG	IL	OK	15.6343	58.1636	1.8954	-1.85218	0.0640003	0.154791	no
XLOC_021703	XLOC_021703	ISCW023257	DS957018:226688-245384	ISG	IL	OK	15.9539	6.44767	-1.30705	1.36624	0.171864	0.302095	no
XLOC_021196	XLOC_021196	ISCW023240	DS948226:113620-117047	ISG	IL	OK	1.08903	0	-1.79769e+308	-1.79769e+308	0.0416323	0.11081	no
XLOC_021195	XLOC_021195	ISCW023239	DS948226:75682-91359	ISG	IL	OK	110.741	2.34427	-5.5619	5.5005	3.78709e-08	4.38729e-06	yes	overexpressed in ISG
XLOC_022594	XLOC_022594	ISCW023237	DS970388:130427-151375	ISG	IL	OK	6.5246	2.16339	-1.5926	1.66362	0.0961877	0.204103	no
XLOC_021297	XLOC_021297	ISCW023234	DS949314:150976-151177	ISG	IL	OK	4.30454	0	-1.79769e+308	-1.79769e+308	0.158655	0.285968	no
XLOC_021296	XLOC_021296	ISCW023232	DS949314:113885-117207	ISG	IL	OK	3.321	1.00495	-1.72449	1.81136	0.0700849	0.165358	no
XLOC_021299	XLOC_021299	ISCW023231	DS949314:99157-113338	ISG	IL	OK	57.5371	72.3945	0.331389	-0.324466	0.745586	0.838554	no
XLOC_021298	XLOC_021298	ISCW023230	DS949314:95288-96044	ISG	IL	OK	2.98031	49.3899	4.05068	-4.19589	2.71803e-05	0.000780591	yes	overexpressed in IL
XLOC_020386	XLOC_020386	ISCW023228	DS934076:106358-110885	ISG	IL	OK	2.37764	19.2568	3.01777	-3.18787	0.00143325	0.0137787	yes	overexpressed in IL
XLOC_020385	XLOC_020385	ISCW023227	DS934076:74926-77131	ISG	IL	OK	17.5286	18.4135	0.0710588	-0.0757728	0.9396	0.964061	no
XLOC_020383	XLOC_020383	ISCW023226	DS934076:41245-71393	ISG	IL	OK	18.3218	4.95134	-1.88767	1.89005	0.0587514	0.14522	no
XLOC_021376	XLOC_021376	ISCW023225	DS950928:522004-525475	ISG	IL	OK	3.44098	1.86201	-0.885955	0.923298	0.355852	0.512088	no
XLOC_021365	XLOC_021365	ISCW023223	DS950928:454744-496914	ISG	IL	OK	2.27944	0.462553	-2.30099	2.16775	0.030178	0.0897826	no
XLOC_021374	XLOC_021374	ISCW023222	DS950928:402032-402646	ISG	IL	OK	78.8444	18.5178	-2.0901	2.17155	0.0298895	0.0890858	no
XLOC_021366	XLOC_021366	ISCW023208	DS950928:31583-154411	ISG	IL	OK	26.6728	41.5697	0.640161	-0.637606	0.52373	0.66867	no
XLOC_022510	XLOC_022510	ISCW023206	DS968935:156900-230297	ISG	IL	OK	7.95379	5.00697	-0.667706	0.669184	0.503378	0.652123	no
XLOC_022509	XLOC_022509	ISCW023205	DS968935:133908-152887	ISG	IL	OK	7.12754	0.568532	-3.64809	3.56401	0.000365228	0.00507903	yes	overexpressed in ISG
XLOC_022508	XLOC_022508	ISCW023204	DS968935:52135-122148	ISG	IL	OK	9.01709	0.607716	-3.89119	3.96186	7.43674e-05	0.00164339	yes	overexpressed in ISG
XLOC_022507	XLOC_022507	ISCW023203	DS968935:39566-44997	ISG	IL	OK	1.95949	0	-1.79769e+308	-1.79769e+308	0.0216541	0.0754501	no
XLOC_022504	XLOC_022504	ISCW023200	DS968935:8533-16561	ISG	IL	OK	19.5193	11.8101	-0.724881	0.764036	0.444846	0.597906	no
XLOC_022669	XLOC_022669	ISCW023198	DS971485:238812-246084	ISG	IL	OK	4.11749	12.7651	1.63237	-1.74488	0.0810063	0.179783	no
XLOC_022673	XLOC_022673	ISCW023197	DS971485:218072-236930	ISG	IL	OK	25.1587	56.0533	1.15574	-1.13038	0.258318	0.409262	no
XLOC_022668	XLOC_022668	ISCW023194	DS971485:104114-130118	ISG	IL	OK	2.49778	0	-1.79769e+308	-1.79769e+308	0.015425	0.0668948	no
XLOC_022670	XLOC_022670	ISCW023192	DS971485:96558-98999	ISG	IL	OK	24.624	7.6242	-1.69141	1.78009	0.0750611	0.174585	no
XLOC_022667	XLOC_022667	ISCW023191	DS971485:92800-93930	ISG	IL	OK	1.50339	3.81342	1.34286	-1.41098	0.158251	0.285968	no
XLOC_022665	XLOC_022665	ISCW023189	DS971485:71750-72722	ISG	IL	OK	0.427512	1.92783	2.17294	-1.99899	0.0456096	0.119374	no
XLOC_022664	XLOC_022664	ISCW023188	DS971485:59092-60046	ISG	IL	OK	2.62912	2.22115	-0.243277	0.252165	0.800914	0.878424	no
XLOC_022663	XLOC_022663	ISCW023187	DS971485:51951-52908	ISG	IL	OK	11.3384	45.7198	2.0116	-2.07725	0.0377788	0.106223	no
XLOC_022662	XLOC_022662	ISCW023186	DS971485:39931-45332	ISG	IL	OK	3.46351	10.2891	1.57082	-1.67673	0.0935953	0.199985	no
XLOC_022661	XLOC_022661	ISCW023185	DS971485:16510-17116	ISG	IL	OK	3.43871	14.5374	2.07983	-2.19846	0.0279162	0.0875409	no
XLOC_022659	XLOC_022659	ISCW023183	DS971485:327-600	ISG	IL	OK	1.49656	0	-1.79769e+308	-1.79769e+308	0.158655	0.285968	no
XLOC_020317	XLOC_020317	ISCW023181	DS932186:416285-438211	ISG	IL	OK	10.4622	4.7978	-1.12474	1.19327	0.232762	0.379575	no
XLOC_020316	XLOC_020316	ISCW023180	DS932186:405746-408933	ISG	IL	OK	89.5365	78.5411	-0.18903	0.189573	0.849643	0.910196	no
XLOC_020322	XLOC_020322	ISCW023179	DS932186:379390-405195	ISG	IL	OK	34.7749	24.4129	-0.510404	0.499685	0.617297	0.747603	no
XLOC_020315	XLOC_020315	ISCW023178	DS932186:367480-375316	ISG	IL	OK	29.9999	21.9119	-0.453247	0.465137	0.641833	0.766152	no
XLOC_020321	XLOC_020321	ISCW023177	DS932186:226125-229367	ISG	IL	OK	5.23843	1.88088	-1.47773	1.5477	0.121694	0.24375	no
XLOC_020314	XLOC_020314	ISCW023176	DS932186:208304-223654	ISG	IL	OK	7.44878	4.84466	-0.620611	0.660315	0.509052	0.657542	no
XLOC_020319	XLOC_020319	ISCW023173	DS932186:108976-113483	ISG	IL	OK	9062.21	12103.4	0.417472	-0.344958	0.730126	0.828024	no
XLOC_020312	XLOC_020312	ISCW023172	DS932186:95548-102311	ISG	IL	OK	38.6532	9.06032	-2.09296	2.17956	0.0292905	0.0878738	no
XLOC_020311	XLOC_020311	ISCW023171	DS932186:49675-57590	ISG	IL	OK	8.651	1.15874	-2.90031	2.97476	0.0029322	0.0228927	yes	overexpressed in ISG
XLOC_020318	XLOC_020318	ISCW023170	DS932186:24455-48764	ISG	IL	OK	75.0802	153.439	1.03116	-0.980737	0.326722	0.481803	no
XLOC_020556	XLOC_020556	ISCW023168	DS937517:154039-154802	ISG	IL	OK	2.35417	1.65874	-0.505134	0.494065	0.621261	0.748056	no
XLOC_020561	XLOC_020561	ISCW023167	DS937517:116489-131453	ISG	IL	OK	0.732422	21.4681	4.87338	-4.57935	4.66434e-06	0.00020111	yes	overexpressed in IL
XLOC_020558	XLOC_020558	ISCW023164	DS937517:33268-33916	ISG	IL	OK	0	19.1195	1.79769e+308	1.79769e+308	0.158655	0.285968	no
XLOC_020555	XLOC_020555	ISCW023162	DS937517:13631-25702	ISG	IL	OK	1.65642	4.20157	1.34286	-1.28124	0.200108	0.339654	no
XLOC_020798	XLOC_020798	ISCW023160	DS941638:263198-288248	ISG	IL	OK	1.83017	44.8755	4.61588	-4.53917	5.64757e-06	0.000234681	yes	overexpressed in IL
XLOC_020797	XLOC_020797	ISCW023157	DS941638:239198-249472	ISG	IL	OK	12.8214	5.42034	-1.2421	1.00467	0.315057	0.471598	no
XLOC_020796	XLOC_020796	ISCW023156	DS941638:131259-192667	ISG	IL	OK	8.49479	0.954313	-3.15404	3.25372	0.00113905	0.0117904	yes	overexpressed in ISG
XLOC_020789	XLOC_020789	ISCW023155	DS941638:128703-129990	ISG	IL	OK	13.8229	149.633	3.4363	-3.3902	0.000698412	0.00819866	yes	overexpressed in IL
XLOC_020795	XLOC_020795	ISCW023154	DS941638:99705-117701	ISG	IL	OK	125.073	26.5865	-2.23401	2.07207	0.0382589	0.107101	no
XLOC_020788	XLOC_020788	ISCW023153	DS941638:85328-92653	ISG	IL	OK	280.899	53.3961	-2.39524	2.29217	0.0218957	0.0761572	no
XLOC_020794	XLOC_020794	ISCW023152	DS941638:63985-84997	ISG	IL	OK	1.7569	0.220072	-2.99699	2.46796	0.0135884	0.066059	no
XLOC_020787	XLOC_020787	ISCW023151	DS941638:41680-52774	ISG	IL	OK	7.01993	7.91394	0.172938	-0.184988	0.853238	0.912428	no
XLOC_020793	XLOC_020793	ISCW023150	DS941638:24469-38081	ISG	IL	OK	112.488	78.8054	-0.513401	0.499176	0.617656	0.747603	no
XLOC_020786	XLOC_020786	ISCW023149	DS941638:22544-24401	ISG	IL	OK	2.50867	1.00474	-1.3201	1.37475	0.16921	0.298656	no
XLOC_020792	XLOC_020792	ISCW023148	DS941638:14040-21545	ISG	IL	OK	214.712	188.116	-0.19078	0.191098	0.848449	0.909465	no
XLOC_020441	XLOC_020441	ISCW023147	DS935393:328540-328771	ISG	IL	OK	5.17274	0	-1.79769e+308	-1.79769e+308	0.0786496	0.175622	no
XLOC_020446	XLOC_020446	ISCW023145	DS935393:271829-295760	ISG	IL	OK	13.737	0.725926	-4.2421	4.11187	3.9246e-05	0.000998031	yes	overexpressed in ISG
XLOC_020445	XLOC_020445	ISCW023144	DS935393:262206-263277	ISG	IL	OK	4.79385	1.06665	-2.1681	2.15028	0.0315331	0.0927791	no
XLOC_020444	XLOC_020444	ISCW023142	DS935393:125174-156164	ISG	IL	OK	4.36516	2.05045	-1.0901	1.07618	0.281849	0.435533	no
XLOC_020443	XLOC_020443	ISCW023140	DS935393:72427-88338	ISG	IL	OK	12.4766	0.959012	-3.70153	2.33374	0.0196096	0.0707463	no
XLOC_020442	XLOC_020442	ISCW023139	DS935393:9249-50733	ISG	IL	OK	36.1282	38.5512	0.0936495	-0.0872934	0.930438	0.958712	no
XLOC_021858	XLOC_021858	ISCW023135	DS959833:101326-102283	ISG	IL	OK	49.858	4.91611	-3.34224	3.4374	0.000587322	0.00726645	yes	overexpressed in ISG
XLOC_021854	XLOC_021854	ISCW023134	DS959833:63449-99107	ISG	IL	OK	23.8977	4.32388	-2.46647	2.55785	0.0105321	0.0567103	no
XLOC_021853	XLOC_021853	ISCW023133	DS959833:58501-62051	ISG	IL	OK	372.644	1128.7	1.5988	-1.58651	0.112623	0.230368	no
XLOC_021857	XLOC_021857	ISCW023132	DS959833:45513-53911	ISG	IL	OK	1.20642	0.748034	-0.689558	0.728113	0.466544	0.616735	no
XLOC_021092	XLOC_021092	ISCW023127	DS946450:197381-199081	ISG	IL	OK	11.5285	5.42898	-1.08645	1.13482	0.256451	0.407289	no
XLOC_021090	XLOC_021090	ISCW023123	DS946450:92397-171988	ISG	IL	OK	6.39136	0.615088	-3.37726	3.409	0.000652024	0.0078001	yes	overexpressed in ISG
XLOC_021089	XLOC_021089	ISCW023122	DS946450:25766-69134	ISG	IL	OK	7.98039	1.44222	-2.46817	2.55803	0.0105266	0.0567071	no
XLOC_021087	XLOC_021087	ISCW023121	DS946450:12757-16515	ISG	IL	OK	549.423	765.134	0.477793	-0.444119	0.656957	0.778328	no
XLOC_021086	XLOC_021086	ISCW023117	DS946429:408474-448433	ISG	IL	OK	1.71514	2.17526	0.342863	-0.311163	0.755677	0.84497	no
XLOC_021081	XLOC_021081	ISCW023115	DS946429:277056-294521	ISG	IL	OK	104.397	15.6228	-2.74035	2.81645	0.00485581	0.0324542	yes	overexpressed in ISG
XLOC_021080	XLOC_021080	ISCW023113	DS946429:181139-260025	ISG	IL	OK	1.96916	0	-1.79769e+308	-1.79769e+308	0.014718	0.066059	no
XLOC_021084	XLOC_021084	ISCW023112	DS946429:123564-125019	ISG	IL	OK	10.1935	5.48466	-0.894176	0.946742	0.34377	0.49895	no
XLOC_021079	XLOC_021079	ISCW023111	DS946429:99208-117188	ISG	IL	OK	62.8424	26.1981	-1.26228	1.29582	0.195039	0.333617	no
XLOC_021083	XLOC_021083	ISCW023110	DS946429:88904-97458	ISG	IL	OK	18.4418	0.299862	-5.94254	3.72464	0.000195598	0.00322779	yes	overexpressed in ISG
XLOC_021082	XLOC_021082	ISCW023109	DS946429:29989-40372	ISG	IL	OK	110.971	68.1245	-0.703943	0.684111	0.493905	0.642827	no
XLOC_022695	XLOC_022695	ISCW023102	DS971679:276737-331192	ISG	IL	OK	15.6216	0.828394	-4.23708	4.25878	2.05542e-05	0.000638852	yes	overexpressed in ISG
XLOC_022694	XLOC_022694	ISCW023100	DS971679:202125-235771	ISG	IL	OK	47.9968	3.52887	-3.76566	2.37304	0.0176425	0.0689517	no
XLOC_022369	XLOC_022369	ISCW023098	DS967430:206148-208242	ISG	IL	OK	2.17807	1.84159	-0.242099	0.193771	0.846355	0.907957	no
XLOC_020406	XLOC_020406	ISCW023096	DS934743:52047-72934	ISG	IL	OK	25.5047	0.765042	-5.05908	5.04077	4.63671e-07	3.18434e-05	yes	overexpressed in ISG
XLOC_020404	XLOC_020404	ISCW023094	DS934743:4681-39798	ISG	IL	OK	3.69061	2.40036	-0.620611	0.649562	0.515975	0.662976	no
XLOC_022455	XLOC_022455	ISCW023093	DS968596:740006-746001	ISG	IL	OK	117.555	148.483	0.336963	-0.340035	0.73383	0.830665	no
XLOC_022471	XLOC_022471	ISCW023092	DS968596:690604-704276	ISG	IL	OK	7.74724	8.32447	0.103676	-0.109153	0.913081	0.947104	no
XLOC_022454	XLOC_022454	ISCW023091	DS968596:662602-684499	ISG	IL	OK	19.0924	12.4079	-0.621743	0.634968	0.52545	0.670181	no
XLOC_022470	XLOC_022470	ISCW023090	DS968596:631578-645180	ISG	IL	OK	10.3635	1.2146	-3.09296	3.13642	0.00171024	0.015336	yes	overexpressed in ISG
XLOC_022452	XLOC_022452	ISCW023088	DS968596:606785-619869	ISG	IL	OK	24.4735	7.79456	-1.65068	1.71339	0.0866403	0.189128	no
XLOC_022469	XLOC_022469	ISCW023085	DS968596:449046-469564	ISG	IL	OK	11.0608	8.10018	-0.449424	0.470415	0.638059	0.762819	no
XLOC_022449	XLOC_022449	ISCW023084	DS968596:447440-448763	ISG	IL	OK	20.1424	6.0362	-1.73852	1.81859	0.0689745	0.163681	no
XLOC_022468	XLOC_022468	ISCW023083	DS968596:434881-447171	ISG	IL	OK	2378.13	4333.05	0.865557	-0.700628	0.483535	0.632097	no
XLOC_022467	XLOC_022467	ISCW023082	DS968596:426789-427682	ISG	IL	OK	8.10605	2.1502	-1.91452	1.99005	0.0465858	0.120963	no
XLOC_022448	XLOC_022448	ISCW023081	DS968596:399230-421340	ISG	IL	OK	72.0107	13.1345	-2.45485	2.49348	0.0126498	0.0639939	no
XLOC_022466	XLOC_022466	ISCW023080	DS968596:376899-394164	ISG	IL	OK	5.87048	4.02113	-0.54588	0.580428	0.561626	0.701895	no
XLOC_022465	XLOC_022465	ISCW023079	DS968596:352247-373411	ISG	IL	OK	15.0026	6.23119	-1.26763	1.30178	0.192992	0.331153	no
XLOC_022447	XLOC_022447	ISCW023078	DS968596:343192-349594	ISG	IL	OK	44.2677	50.347	0.185649	-0.193758	0.846365	0.907957	no
XLOC_022464	XLOC_022464	ISCW023077	DS968596:341496-342652	ISG	IL	OK	88.8871	74.3785	-0.257088	0.250016	0.802575	0.879573	no
XLOC_022446	XLOC_022446	ISCW023076	DS968596:332757-337066	ISG	IL	OK	4722.78	4235.27	-0.157181	0.115202	0.908285	0.944264	no
XLOC_022463	XLOC_022463	ISCW023075	DS968596:329064-330265	ISG	IL	OK	37.2627	32.4137	-0.201127	0.20442	0.838026	0.903489	no
XLOC_022445	XLOC_022445	ISCW023074	DS968596:326800-327391	ISG	IL	OK	237.118	238.468	0.00819362	-0.00791306	0.993686	0.99556	no
XLOC_022444	XLOC_022444	ISCW023073	DS968596:321870-323193	ISG	IL	OK	3.71027	19.9783	2.42884	-2.55337	0.0106687	0.0570438	no
XLOC_022443	XLOC_022443	ISCW023071	DS968596:293855-320126	ISG	IL	OK	12.8975	4.16114	-1.63205	1.70812	0.0876134	0.190274	no
XLOC_022442	XLOC_022442	ISCW023070	DS968596:279270-280413	ISG	IL	OK	3.85469	3.2592	-0.242099	0.137017	0.891018	0.93453	no
XLOC_022441	XLOC_022441	ISCW023069	DS968596:248427-270997	ISG	IL	OK	19.9517	10.8287	-0.881657	0.889249	0.373869	0.529603	no
XLOC_022461	XLOC_022461	ISCW023068	DS968596:236476-244098	ISG	IL	OK	2630.05	2015.07	-0.384259	0.33137	0.740365	0.834727	no
XLOC_022440	XLOC_022440	ISCW023067	DS968596:218981-220244	ISG	IL	OK	0.619154	3.49002	2.49487	-2.47606	0.013284	0.066059	no
XLOC_022439	XLOC_022439	ISCW023066	DS968596:197949-217589	ISG	IL	OK	8.83708	1.08288	-3.0287	3.09903	0.00194153	0.0169205	yes	overexpressed in ISG
XLOC_022438	XLOC_022438	ISCW023064	DS968596:163142-196082	ISG	IL	OK	5.90717	7.47091	0.338817	-0.351851	0.72495	0.823915	no
XLOC_022437	XLOC_022437	ISCW023063	DS968596:150991-152922	ISG	IL	OK	3.91728	21.9027	2.48318	-2.57184	0.0101159	0.0550375	no
XLOC_022436	XLOC_022436	ISCW023060	DS968596:61446-150365	ISG	IL	OK	5.93954	0.744946	-2.99514	3.07848	0.00208063	0.0178845	yes	overexpressed in ISG
XLOC_022457	XLOC_022457	ISCW023059	DS968596:51333-60725	ISG	IL	OK	19.1681	7.7793	-1.30099	1.36771	0.171402	0.301644	no
XLOC_020616	XLOC_020616	ISCW023056	DS939008:279-2600	ISG	IL	OK	149.55	21.0744	-2.82706	2.32832	0.0198953	0.0715375	no
XLOC_021971	XLOC_021971	ISCW023055	DS961804:485997-497009	ISG	IL	OK	1.89285	0	-1.79769e+308	-1.79769e+308	0.0786496	0.175622	no
XLOC_021964	XLOC_021964	ISCW023050	DS961804:342520-362263	ISG	IL	OK	1.45414	18.7498	3.68864	-3.82553	0.000130491	0.00246964	yes	overexpressed in IL
XLOC_021963	XLOC_021963	ISCW023049	DS961804:308094-324876	ISG	IL	OK	11.9327	13.9378	0.224077	-0.235428	0.813876	0.886708	no
XLOC_021968	XLOC_021968	ISCW023045	DS961804:90302-107822	ISG	IL	OK	2.69645	58.1371	4.43033	-4.57538	4.75367e-06	0.000203432	yes	overexpressed in IL
XLOC_020614	XLOC_020614	ISCW023044	DS938953:111398-116610	ISG	IL	OK	87.5738	832.504	3.24889	-3.38046	0.000723649	0.00841737	yes	overexpressed in IL
XLOC_020613	XLOC_020613	ISCW023043	DS938953:84686-104846	ISG	IL	OK	4.18756	11.6133	1.4716	-1.57997	0.114114	0.232878	no
XLOC_020612	XLOC_020612	ISCW023042	DS938953:73877-80010	ISG	IL	OK	3.65812	1.81941	-1.00763	0.993186	0.320619	0.475631	no
XLOC_022655	XLOC_022655	ISCW023039	DS971334:1075948-1128746	ISG	IL	OK	3.27056	0.564348	-2.53488	2.50922	0.0120997	0.0621458	no
XLOC_022649	XLOC_022649	ISCW023038	DS971334:1070352-1071639	ISG	IL	OK	3.43049	99.3004	4.85531	-4.94779	7.50603e-07	4.78259e-05	yes	overexpressed in IL
XLOC_021256	XLOC_021256	ISCW023024	DS948778:136692-186887	ISG	IL	OK	2.11125	1.19006	-0.827062	0.88251	0.377501	0.533723	no
XLOC_021254	XLOC_021254	ISCW023023	DS948778:71131-104154	ISG	IL	OK	10.2708	8.27446	-0.311808	0.319281	0.749513	0.841359	no
XLOC_021252	XLOC_021252	ISCW023020	DS948778:11030-23840	ISG	IL	OK	2.33927	3.59616	0.620397	-0.638821	0.52294	0.667958	no
XLOC_020403	XLOC_020403	ISCW023017	DS934716:104041-120587	ISG	IL	OK	63.9878	52.2043	-0.293629	0.308153	0.757966	0.846952	no
XLOC_020402	XLOC_020402	ISCW023016	DS934716:10736-37423	ISG	IL	OK	15.7296	3.79988	-2.04945	2.14273	0.0321349	0.0938277	no
XLOC_020400	XLOC_020400	ISCW023015	DS934716:1639-3806	ISG	IL	OK	13.2394	5.53122	-1.25917	1.33188	0.182901	0.317495	no
XLOC_021145	XLOC_021145	ISCW023014	DS947555:94631-109017	ISG	IL	OK	41.5122	6.79339	-2.61133	2.68321	0.00729182	0.0434216	yes	overexpressed in ISG
XLOC_021144	XLOC_021144	ISCW023013	DS947555:14269-65717	ISG	IL	OK	2.27035	23.401	3.36558	-3.52346	0.000425953	0.00567415	yes	overexpressed in IL
XLOC_021524	XLOC_021524	ISCW023006	DS953432:494349-499080	ISG	IL	OK	4.51365	1.90818	-1.2421	1.26278	0.206668	0.345319	no
XLOC_021518	XLOC_021518	ISCW023004	DS953432:458911-470823	ISG	IL	OK	589.74	212.776	-1.47074	1.3294	0.183717	0.318671	no
XLOC_021521	XLOC_021521	ISCW023000	DS953432:70603-79186	ISG	IL	OK	18.6831	1.36516	-3.77459	3.7904	0.000150408	0.00269109	yes	overexpressed in ISG
XLOC_021513	XLOC_021513	ISCW022998	DS953335:122697-135588	ISG	IL	OK	5.7414	0	-1.79769e+308	-1.79769e+308	0.014149	0.066059	no
XLOC_020739	XLOC_020739	ISCW022995	DS940786:59085-83528	ISG	IL	OK	0.279519	1.8907	2.7579	-2.23072	0.0256996	0.0833567	no
XLOC_021311	XLOC_021311	ISCW022987	DS949736:5107-23169	ISG	IL	OK	0.1029	9.04832	6.45834	-4.06828	4.73623e-05	0.00116316	yes	overexpressed in IL
XLOC_021904	XLOC_021904	ISCW022986	DS961243:25428-36275	ISG	IL	OK	1.80302	0	-1.79769e+308	-1.79769e+308	0.0293909	0.0878738	no
XLOC_021903	XLOC_021903	ISCW022985	DS961243:8921-19092	ISG	IL	OK	19.5333	4.02121	-2.28023	2.37048	0.017765	0.0692417	no
XLOC_022045	XLOC_022045	ISCW022983	DS962636:548998-550189	ISG	IL	OK	30.71	17.1981	-0.83646	0.872999	0.382663	0.538443	no
XLOC_022038	XLOC_022038	ISCW022981	DS962636:494621-533921	ISG	IL	OK	3.72581	1.21162	-1.62061	1.70433	0.0883196	0.191518	no
XLOC_022043	XLOC_022043	ISCW022980	DS962636:463128-475168	ISG	IL	OK	22.5207	32.2074	0.516143	-0.525832	0.599005	0.732137	no
XLOC_022042	XLOC_022042	ISCW022979	DS962636:430258-440426	ISG	IL	OK	13.3654	10.359	-0.36763	0.38845	0.697683	0.805963	no
XLOC_020664	XLOC_020664	ISCW022963	DS939604:881717-883348	ISG	IL	OK	6.31777	0	-1.79769e+308	-1.79769e+308	0.0194336	0.0705669	no
XLOC_020659	XLOC_020659	ISCW022961	DS939604:711414-712890	ISG	IL	OK	2.57568	5.95259	1.20856	-1.29791	0.194319	0.332782	no
XLOC_020657	XLOC_020657	ISCW022950	DS939604:9412-21846	ISG	IL	OK	12.9979	351.082	4.75546	-4.84128	1.29008e-06	7.28866e-05	yes	overexpressed in IL
XLOC_021533	XLOC_021533	ISCW022948	DS953435:163903-215853	ISG	IL	OK	0.836642	11.8488	3.82399	-3.95905	7.52478e-05	0.00165184	yes	overexpressed in IL
XLOC_021532	XLOC_021532	ISCW022947	DS953435:110110-117471	ISG	IL	OK	9.35812	14.9119	0.672171	-0.717957	0.472784	0.623188	no
XLOC_021531	XLOC_021531	ISCW022945	DS953435:66079-100896	ISG	IL	OK	6.01841	4.62604	-0.379603	0.403462	0.686608	0.798593	no
XLOC_022679	XLOC_022679	ISCW022942	DS971562:574964-575420	ISG	IL	OK	2.19582	0	-1.79769e+308	-1.79769e+308	0.0293909	0.0878738	no
XLOC_022681	XLOC_022681	ISCW022939	DS971562:339805-340315	ISG	IL	OK	3.60604	45.7343	3.66479	-3.80371	0.000142546	0.00261736	yes	overexpressed in IL
XLOC_021349	XLOC_021349	ISCW022936	DS950795:282628-305306	ISG	IL	OK	5.0571	0	-1.79769e+308	-1.79769e+308	0.0339159	0.0980961	no
XLOC_021351	XLOC_021351	ISCW022934	DS950795:109072-153283	ISG	IL	OK	4.00444	0.662442	-2.59574	2.66795	0.00763148	0.0448848	yes	overexpressed in ISG
XLOC_021347	XLOC_021347	ISCW022933	DS950795:82263-92527	ISG	IL	OK	4.81128	10.9255	1.18321	-1.26889	0.204482	0.343472	no
XLOC_021350	XLOC_021350	ISCW022932	DS950795:41306-77833	ISG	IL	OK	26.4791	30.0741	0.183665	-0.190182	0.849167	0.90977	no
XLOC_020415	XLOC_020415	ISCW022931	DS934919:4700-5924	ISG	IL	OK	0.479815	3.24552	2.7579	-1.70981	0.0873001	0.189702	no
XLOC_018826	XLOC_018826	ISCW022930	DS909779:323935-374009	ISG	IL	OK	1.10466	0.830228	-0.412024	0.410271	0.681607	0.795659	no
XLOC_018825	XLOC_018825	ISCW022928	DS909779:109151-152764	ISG	IL	OK	23.1027	3.09166	-2.90161	3.00109	0.00269015	0.0215156	yes	overexpressed in ISG
XLOC_018824	XLOC_018824	ISCW022927	DS909779:95145-100069	ISG	IL	OK	504.858	214.658	-1.23384	1.17719	0.239119	0.387243	no
XLOC_018821	XLOC_018821	ISCW022925	DS909779:52349-66418	ISG	IL	OK	199.309	89.6306	-1.15294	1.0702	0.284531	0.438614	no
XLOC_020026	XLOC_020026	ISCW022921	DS928161:161447-175517	ISG	IL	OK	2.37529	1.33889	-0.827062	0.861598	0.388909	0.545148	no
XLOC_020025	XLOC_020025	ISCW022920	DS928161:113548-161024	ISG	IL	OK	24.0782	10.2472	-1.23249	1.24043	0.214817	0.355877	no
XLOC_020023	XLOC_020023	ISCW022916	DS928161:29145-50681	ISG	IL	OK	4.6407	0	-1.79769e+308	-1.79769e+308	0.0142768	0.066059	no
XLOC_018360	XLOC_018360	ISCW022913	DS903006:518470-576803	ISG	IL	OK	15.2517	7.22151	-1.0786	1.08844	0.276401	0.429203	no
XLOC_018358	XLOC_018358	ISCW022909	DS903006:145984-227109	ISG	IL	OK	4.15059	0.621916	-2.73852	2.79313	0.00522003	0.034082	yes	overexpressed in ISG
XLOC_018357	XLOC_018357	ISCW022908	DS903006:135332-137581	ISG	IL	OK	59.9909	0	-1.79769e+308	-1.79769e+308	0.0194737	0.0705669	no
XLOC_018949	XLOC_018949	ISCW022904	DS911299:1739688-1743562	ISG	IL	OK	5.95607	0.71942	-3.04945	1.91415	0.0556006	0.138936	no
XLOC_018945	XLOC_018945	ISCW022900	DS911299:1617222-1625961	ISG	IL	OK	15.3588	0.86574	-4.14899	3.86697	0.000110194	0.00220201	yes	overexpressed in ISG
XLOC_018931	XLOC_018931	ISCW022896	DS911299:1514383-1578699	ISG	IL	OK	3.86848	1.05822	-1.87013	1.96018	0.0499743	0.127722	no
XLOC_018942	XLOC_018942	ISCW022895	DS911299:1446917-1450873	ISG	IL	OK	8.00994	0	-1.79769e+308	-1.79769e+308	0.017132	0.0678946	no
XLOC_018941	XLOC_018941	ISCW022893	DS911299:1344162-1408399	ISG	IL	OK	4.39806	0.999472	-2.13763	2.21753	0.0265868	0.0849372	no
XLOC_018929	XLOC_018929	ISCW022892	DS911299:1260351-1311846	ISG	IL	OK	8.65135	4.32241	-1.00109	1.05029	0.293583	0.448827	no
XLOC_018924	XLOC_018924	ISCW022883	DS911299:659833-660055	ISG	IL	OK	2.97713	0	-1.79769e+308	-1.79769e+308	0.158655	0.285968	no
XLOC_018937	XLOC_018937	ISCW022881	DS911299:333472-333983	ISG	IL	OK	19.4553	0	-1.79769e+308	-1.79769e+308	0.0162914	0.0672943	no
XLOC_018936	XLOC_018936	ISCW022880	DS911299:249253-269519	ISG	IL	OK	33.0505	0.743952	-5.47332	5.43041	5.62248e-08	5.97076e-06	yes	overexpressed in ISG
XLOC_018922	XLOC_018922	ISCW022879	DS911299:245048-246243	ISG	IL	OK	57.909	85.242	0.557778	-0.545333	0.585525	0.722473	no
XLOC_018935	XLOC_018935	ISCW022878	DS911299:124585-124762	ISG	IL	OK	171.442	0	-1.79769e+308	-1.79769e+308	0.0142299	0.066059	no
XLOC_018934	XLOC_018934	ISCW022876	DS911299:12054-17331	ISG	IL	OK	13.2247	0	-1.79769e+308	-1.79769e+308	0.014976	0.0667807	no
XLOC_018933	XLOC_018933	ISCW022875	DS911299:9417-10596	ISG	IL	OK	8.96965	4.36078	-1.04047	1.10365	0.269746	0.420971	no
XLOC_018527	XLOC_018527	ISCW022868	DS905169:582622-587805	ISG	IL	OK	6.17628	0.549698	-3.49003	2.19871	0.0278989	0.0875409	no
XLOC_018536	XLOC_018536	ISCW022866	DS905169:494001-494448	ISG	IL	OK	222.843	11.5593	-4.2689	4.32053	1.55658e-05	0.000526916	yes	overexpressed in ISG
XLOC_018534	XLOC_018534	ISCW022863	DS905169:153192-179158	ISG	IL	OK	49.2545	16.1609	-1.60775	1.58616	0.112704	0.230492	no
XLOC_018533	XLOC_018533	ISCW022861	DS905169:135219-140040	ISG	IL	OK	7.37534	5.95673	-0.308188	0.328894	0.742236	0.836054	no
XLOC_018524	XLOC_018524	ISCW022860	DS905169:131804-135219	ISG	IL	OK	84.2564	118.258	0.489084	-0.510998	0.609352	0.740765	no
XLOC_018532	XLOC_018532	ISCW022859	DS905169:125320-126811	ISG	IL	OK	1.95257	1.72511	-0.178681	0.188653	0.850365	0.910884	no
XLOC_018523	XLOC_018523	ISCW022857	DS905169:108859-121907	ISG	IL	OK	45.9664	25.425	-0.854335	0.835803	0.403265	0.559663	no
XLOC_018530	XLOC_018530	ISCW022856	DS905169:107361-108834	ISG	IL	OK	2.00464	0	-1.79769e+308	-1.79769e+308	0.158655	0.285968	no
XLOC_018522	XLOC_018522	ISCW022855	DS905169:105226-106930	ISG	IL	OK	8.223	22.027	1.42154	-1.45595	0.145407	0.279332	no
XLOC_018294	XLOC_018294	ISCW022850	DS902046:122585-353636	ISG	IL	OK	0	4.11925	1.79769e+308	1.79769e+308	0.0185281	0.070178	no
XLOC_019636	XLOC_019636	ISCW022845	DS922315:3634924-3651743	ISG	IL	OK	10.1831	0.425182	-4.58195	3.74943	0.000177235	0.00302037	yes	overexpressed in ISG
XLOC_019635	XLOC_019635	ISCW022843	DS922315:3610649-3628631	ISG	IL	OK	6.42968	1.47427	-2.12474	2.20434	0.0275007	0.0868407	no
XLOC_019634	XLOC_019634	ISCW022842	DS922315:3561880-3571256	ISG	IL	OK	35.5053	2.91105	-3.60842	3.66308	0.000249196	0.00388893	yes	overexpressed in ISG
XLOC_019633	XLOC_019633	ISCW022841	DS922315:3524442-3553924	ISG	IL	OK	22.2137	17.7601	-0.322811	0.319038	0.749698	0.841484	no
XLOC_019618	XLOC_019618	ISCW022840	DS922315:3428127-3517525	ISG	IL	OK	33.2908	35.5841	0.0961118	-0.0946587	0.924586	0.954707	no
XLOC_019624	XLOC_019624	ISCW022811	DS922315:645836-668680	ISG	IL	OK	20.6896	3.08821	-2.74406	2.73881	0.0061662	0.0383723	yes	overexpressed in ISG
XLOC_019623	XLOC_019623	ISCW022810	DS922315:521736-544452	ISG	IL	OK	3.83689	1.58377	-1.27658	1.23619	0.216386	0.358115	no
XLOC_019622	XLOC_019622	ISCW022806	DS922315:377455-388500	ISG	IL	OK	2.5447	1.6291	-0.643418	0.472881	0.636298	0.761367	no
XLOC_019620	XLOC_019620	ISCW022804	DS922315:349930-351512	ISG	IL	OK	0	3.83436	1.79769e+308	1.79769e+308	0.158655	0.285968	no
XLOC_019596	XLOC_019596	ISCW022800	DS922315:61374-224560	ISG	IL	OK	9.93855	22.1896	1.15878	-1.22644	0.220033	0.36258	no
XLOC_018092	XLOC_018092	ISCW022799	DS898814:20810-21063	ISG	IL	OK	13.3182	0	-1.79769e+308	-1.79769e+308	0.0216541	0.0754501	no
XLOC_019820	XLOC_019820	ISCW022797	DS924853:205310-205625	ISG	IL	OK	0	8.40964	1.79769e+308	1.79769e+308	0.0293909	0.0878738	no
XLOC_018773	XLOC_018773	ISCW022796	DS909250:1361894-1363050	ISG	IL	OK	36.7772	150.694	2.03474	-2.1009	0.0356497	0.101733	no
XLOC_018772	XLOC_018772	ISCW022795	DS909250:1332007-1339938	ISG	IL	OK	4.82958	9.80035	1.02094	-1.09541	0.273339	0.425305	no
XLOC_018758	XLOC_018758	ISCW022794	DS909250:1243571-1284341	ISG	IL	OK	65.5322	21.1673	-1.63037	1.58437	0.113109	0.231239	no
XLOC_018753	XLOC_018753	ISCW022788	DS909250:1094131-1112624	ISG	IL	OK	25.152	1.4383	-4.12823	4.12836	3.65358e-05	0.000940005	yes	overexpressed in ISG
XLOC_018770	XLOC_018770	ISCW022787	DS909250:1060717-1072737	ISG	IL	OK	4.64447	10.4719	1.17294	-1.06449	0.287106	0.441337	no
XLOC_018769	XLOC_018769	ISCW022786	DS909250:1020471-1029918	ISG	IL	OK	18.8012	38.4316	1.03147	-1.07269	0.283411	0.437451	no
XLOC_018768	XLOC_018768	ISCW022785	DS909250:1018554-1019976	ISG	IL	OK	10.2358	26.3097	1.36197	-1.46289	0.143496	0.276877	no
XLOC_018767	XLOC_018767	ISCW022784	DS909250:1017010-1017181	ISG	IL	OK	33.0089	153.502	2.21733	-2.2344	0.0254567	0.0830619	no
XLOC_018766	XLOC_018766	ISCW022782	DS909250:909809-950680	ISG	IL	OK	1.95357	22.1408	3.50252	-3.61005	0.000306139	0.00450142	yes	overexpressed in IL
XLOC_018764	XLOC_018764	ISCW022779	DS909250:807931-809260	ISG	IL	OK	1.2283	0.692361	-0.827062	0.496471	0.619562	0.747603	no
XLOC_018750	XLOC_018750	ISCW022777	DS909250:777043-777196	ISG	IL	OK	0	68.1691	1.79769e+308	1.79769e+308	0.0416323	0.11081	no
XLOC_018749	XLOC_018749	ISCW022773	DS909250:428610-444879	ISG	IL	OK	239.425	20.0988	-3.5744	3.34248	0.000830341	0.00930907	yes	overexpressed in ISG
XLOC_018558	XLOC_018558	ISCW022769	DS905614:272695-275878	ISG	IL	OK	1.7258	2.10123	0.28397	-0.303372	0.761606	0.849422	no
XLOC_018552	XLOC_018552	ISCW022767	DS905614:267083-270631	ISG	IL	OK	12.4527	16.7893	0.431091	-0.456916	0.647731	0.770721	no
XLOC_018557	XLOC_018557	ISCW022766	DS905614:240571-255912	ISG	IL	OK	122.806	17.6466	-2.79892	2.6553	0.00792377	0.0461074	yes	overexpressed in ISG
XLOC_018556	XLOC_018556	ISCW022765	DS905614:193484-230479	ISG	IL	OK	26.862	18.8735	-0.509203	0.516694	0.605369	0.737595	no
XLOC_018551	XLOC_018551	ISCW022764	DS905614:186665-188974	ISG	IL	OK	1.56391	0.146923	-3.41202	2.1474	0.0317611	0.0929019	no
XLOC_018555	XLOC_018555	ISCW022763	DS905614:124713-185598	ISG	IL	OK	8.9841	13.2754	0.563304	-0.561721	0.574306	0.712689	no
XLOC_018554	XLOC_018554	ISCW022762	DS905614:22693-63988	ISG	IL	OK	8.21196	6.85189	-0.261224	0.270955	0.786425	0.869099	no
XLOC_018550	XLOC_018550	ISCW022761	DS905614:691-16566	ISG	IL	OK	1060.05	2101.19	0.987072	-0.769525	0.441582	0.594872	no
XLOC_020130	XLOC_020130	ISCW022752	DS929178:274604-289504	ISG	IL	OK	0.164217	2.77696	4.07983	-2.54985	0.0107769	0.0573284	no
XLOC_020128	XLOC_020128	ISCW022746	DS929178:208731-252213	ISG	IL	OK	4.90772	1.77855	-1.46435	1.53547	0.124668	0.248577	no
XLOC_020125	XLOC_020125	ISCW022743	DS929178:68542-89440	ISG	IL	OK	0	10.8614	1.79769e+308	1.79769e+308	0.0158995	0.0672943	no
XLOC_017839	XLOC_017839	ISCW022740	DS894332:370863-378206	ISG	IL	OK	3.01024	21.5654	2.84077	-2.82211	0.00477089	0.0319797	yes	overexpressed in IL
XLOC_019150	XLOC_019150	ISCW022739	DS915052:765727-803495	ISG	IL	OK	0.117952	6.18327	5.7121	-3.60219	0.000315547	0.00460434	yes	overexpressed in IL
XLOC_019145	XLOC_019145	ISCW022728	DS915052:45640-53328	ISG	IL	OK	0	4.56628	1.79769e+308	1.79769e+308	0.0227501	0.0762482	no
XLOC_019260	XLOC_019260	ISCW022727	DS916876:332983-344743	ISG	IL	OK	32.0799	4.80072	-2.74035	2.84117	0.00449487	0.0305582	yes	overexpressed in ISG
XLOC_019254	XLOC_019254	ISCW022726	DS916876:322478-327500	ISG	IL	OK	6.87974	17.7929	1.37088	-1.40194	0.160933	0.287992	no
XLOC_019259	XLOC_019259	ISCW022725	DS916876:272784-321531	ISG	IL	OK	13.5177	11.5518	-0.226728	0.230349	0.817821	0.888976	no
XLOC_019253	XLOC_019253	ISCW022724	DS916876:272784-321531	ISG	IL	OK	14.5138	24.4525	0.75256	-0.764556	0.444536	0.59763	no
XLOC_019257	XLOC_019257	ISCW022721	DS916876:231107-238293	ISG	IL	OK	5.71731	5.27353	-0.116568	0.123089	0.902037	0.940155	no
XLOC_019251	XLOC_019251	ISCW022720	DS916876:210232-221744	ISG	IL	OK	20.2358	2.40978	-3.06994	3.13945	0.00169267	0.0152022	yes	overexpressed in ISG
XLOC_019250	XLOC_019250	ISCW022718	DS916876:195296-196508	ISG	IL	OK	1.62652	48.7755	4.90629	-5.028	4.9562e-07	3.38349e-05	yes	overexpressed in IL
XLOC_019249	XLOC_019249	ISCW022717	DS916876:189441-190560	ISG	IL	OK	11.9506	0.202088	-5.88596	3.69053	0.000223785	0.00357962	yes	overexpressed in ISG
XLOC_019248	XLOC_019248	ISCW022716	DS916876:185956-188402	ISG	IL	OK	6.06227	1.28143	-2.2421	1.3988	0.161872	0.288278	no
XLOC_019247	XLOC_019247	ISCW022715	DS916876:167326-175544	ISG	IL	OK	9.90779	0	-1.79769e+308	-1.79769e+308	0.0194336	0.0705669	no
XLOC_019246	XLOC_019246	ISCW022714	DS916876:88908-100082	ISG	IL	OK	12.0244	2.27026	-2.40504	2.49826	0.0124805	0.0633641	no
XLOC_019255	XLOC_019255	ISCW022713	DS916876:72688-87402	ISG	IL	OK	6.92522	3.57828	-0.952593	1.00521	0.314797	0.471598	no
XLOC_019266	XLOC_019266	ISCW022711	DS917143:93609-95596	ISG	IL	OK	2.99312	0	-1.79769e+308	-1.79769e+308	0.0786496	0.175622	no
XLOC_018390	XLOC_018390	ISCW022709	DS903494:1069512-1184600	ISG	IL	OK	1.19196	0.617031	-0.949918	1.00632	0.314262	0.471393	no
XLOC_018399	XLOC_018399	ISCW022707	DS903494:595111-608873	ISG	IL	OK	10.9477	0	-1.79769e+308	-1.79769e+308	0.0786496	0.175622	no
XLOC_018398	XLOC_018398	ISCW022706	DS903494:519079-537272	ISG	IL	OK	9.57135	0.758692	-3.65714	3.42913	0.000605514	0.00741949	yes	overexpressed in ISG
XLOC_018397	XLOC_018397	ISCW022705	DS903494:469853-479116	ISG	IL	OK	2.00079	0.563899	-1.82706	1.4902	0.136173	0.264527	no
XLOC_018396	XLOC_018396	ISCW022704	DS903494:434269-449434	ISG	IL	OK	0.102609	15.0957	7.20084	-4.52062	6.16592e-06	0.000251662	yes	overexpressed in IL
XLOC_018389	XLOC_018389	ISCW022702	DS903494:297504-297938	ISG	IL	OK	2.36916	309.822	7.03092	-6.451	1.11118e-10	3.14104e-08	yes	overexpressed in IL
XLOC_018388	XLOC_018388	ISCW022701	DS903494:283026-290238	ISG	IL	OK	3.26848	14.5086	2.15022	-2.28882	0.02209	0.0762482	no
XLOC_018386	XLOC_018386	ISCW022696	DS903494:161088-164329	ISG	IL	OK	1.16897	0.741287	-0.657137	0.684428	0.493705	0.642713	no
XLOC_018392	XLOC_018392	ISCW022695	DS903494:120629-123478	ISG	IL	OK	0.519756	3.51569	2.7579	-2.23072	0.0256996	0.0833567	no
XLOC_019393	XLOC_019393	ISCW022689	DS919850:106533-107200	ISG	IL	OK	23.0107	426.024	4.21056	-4.16416	3.12497e-05	0.000837846	yes	overexpressed in IL
XLOC_019392	XLOC_019392	ISCW022688	DS919850:89260-89614	ISG	IL	OK	14.1114	91.6831	2.6998	-2.86732	0.00413959	0.029105	yes	overexpressed in IL
XLOC_019391	XLOC_019391	ISCW022687	DS919850:72568-73248	ISG	IL	OK	6.45928	60.8557	3.23595	-3.38573	0.000709884	0.00829935	yes	overexpressed in IL
XLOC_019338	XLOC_019338	ISCW022685	DS918780:204186-284517	ISG	IL	OK	1.70682	41.0493	4.58798	-4.55136	5.32995e-06	0.000225073	yes	overexpressed in IL
XLOC_019342	XLOC_019342	ISCW022683	DS918780:168003-169890	ISG	IL	OK	36.5037	14.3632	-1.34567	1.34321	0.179203	0.312114	no
XLOC_019336	XLOC_019336	ISCW022682	DS918780:163033-164782	ISG	IL	OK	4.74454	3.50101	-0.438496	0.469232	0.638904	0.763449	no
XLOC_019341	XLOC_019341	ISCW022680	DS918780:154050-159615	ISG	IL	OK	91.4991	97.9029	0.0975933	-0.0990412	0.921106	0.952286	no
XLOC_019334	XLOC_019334	ISCW022679	DS918780:137377-140237	ISG	IL	OK	12.2877	2.91837	-2.07398	2.16456	0.0304216	0.0902497	no
XLOC_019333	XLOC_019333	ISCW022678	DS918780:122840-128284	ISG	IL	OK	251.261	92.1603	-1.44697	1.36939	0.170876	0.301088	no
XLOC_019340	XLOC_019340	ISCW022677	DS918780:114500-118435	ISG	IL	OK	47.4605	16.1237	-1.55754	1.51506	0.129757	0.256672	no
XLOC_019332	XLOC_019332	ISCW022676	DS918780:99377-113446	ISG	IL	OK	27.0507	19.6157	-0.463657	0.4576	0.64724	0.770361	no
XLOC_019331	XLOC_019331	ISCW022675	DS918780:60640-89116	ISG	IL	OK	8.47137	1.37157	-2.62676	2.69848	0.00696578	0.0418933	yes	overexpressed in ISG
XLOC_019339	XLOC_019339	ISCW022674	DS918780:30807-34927	ISG	IL	OK	1.52942	0.51726	-1.56403	0.958219	0.337952	0.493064	no
XLOC_019783	XLOC_019783	ISCW022671	DS924461:248637-249231	ISG	IL	OK	1.41052	0.954089	-0.564027	0.442668	0.658006	0.778328	no
XLOC_019782	XLOC_019782	ISCW022670	DS924461:118226-126416	ISG	IL	OK	2.42918	4.10781	0.757901	-0.704813	0.480926	0.629723	no
XLOC_019781	XLOC_019781	ISCW022669	DS924461:117730-118120	ISG	IL	OK	0.598084	4.04551	2.7579	-1.70981	0.0873001	0.189702	no
XLOC_019780	XLOC_019780	ISCW022668	DS924461:84051-92787	ISG	IL	OK	42.9748	15.5033	-1.47092	1.49825	0.134068	0.262036	no
XLOC_019779	XLOC_019779	ISCW022667	DS924461:80714-81329	ISG	IL	OK	0.802628	2.26211	1.49487	-1.32306	0.185815	0.321435	no
XLOC_019776	XLOC_019776	ISCW022666	DS924461:77924-78560	ISG	IL	OK	16.2823	12.0461	-0.434744	0.464404	0.642358	0.766619	no
XLOC_019778	XLOC_019778	ISCW022665	DS924461:12918-77146	ISG	IL	OK	2.56692	0.917055	-1.48496	1.5649	0.117606	0.238729	no
XLOC_019775	XLOC_019775	ISCW022664	DS924461:8877-10306	ISG	IL	OK	0.267484	2.26162	3.07983	-2.87563	0.00403227	0.0286708	yes	overexpressed in IL
XLOC_019736	XLOC_019736	ISCW022663	DS923918:280853-281555	ISG	IL	OK	24.6862	18.2634	-0.434744	0.456905	0.64774	0.770721	no
XLOC_019735	XLOC_019735	ISCW022662	DS923918:216909-240758	ISG	IL	OK	15.4618	51.6574	1.74027	-1.67429	0.0940741	0.200583	no
XLOC_019730	XLOC_019730	ISCW022661	DS923918:185635-204045	ISG	IL	OK	35.7189	19.4378	-0.877825	0.885435	0.375922	0.531884	no
XLOC_019734	XLOC_019734	ISCW022660	DS923918:168076-184869	ISG	IL	OK	15.6141	6.96104	-1.16548	1.22867	0.219194	0.361406	no
XLOC_019729	XLOC_019729	ISCW022659	DS923918:164651-167599	ISG	IL	OK	28.4443	18.3313	-0.633829	0.642357	0.520642	0.666499	no
XLOC_019733	XLOC_019733	ISCW022658	DS923918:127732-164040	ISG	IL	OK	20.4537	2.25572	-3.1807	3.27462	0.00105804	0.0111738	yes	overexpressed in ISG
XLOC_019728	XLOC_019728	ISCW022657	DS923918:111767-118249	ISG	IL	OK	48.3005	43.9802	-0.135184	0.144707	0.884943	0.932593	no
XLOC_019732	XLOC_019732	ISCW022656	DS923918:100874-107610	ISG	IL	OK	6.52286	47.7982	2.87338	-2.68005	0.00736107	0.0436587	yes	overexpressed in IL
XLOC_019727	XLOC_019727	ISCW022655	DS923918:92468-100218	ISG	IL	OK	284.613	312.438	0.13457	-0.120685	0.903941	0.941455	no
XLOC_019731	XLOC_019731	ISCW022654	DS923918:27577-33530	ISG	IL	OK	31.3086	12.6605	-1.30623	1.3825	0.166819	0.295197	no
XLOC_019589	XLOC_019589	ISCW022652	DS922069:119732-132497	ISG	IL	OK	12.6487	1.33544	-3.2436	2.0402	0.0413305	0.11081	no
XLOC_019588	XLOC_019588	ISCW022649	DS922069:15383-77768	ISG	IL	OK	2.97376	0	-1.79769e+308	-1.79769e+308	0.0141584	0.066059	no
XLOC_019208	XLOC_019208	ISCW022648	DS915637:252212-272663	ISG	IL	OK	235.412	159.268	-0.563731	0.520868	0.602459	0.734751	no
XLOC_019207	XLOC_019207	ISCW022645	DS915637:186679-225302	ISG	IL	OK	6.18607	0.523041	-3.56403	2.9344	0.00334189	0.0250183	yes	overexpressed in ISG
XLOC_019201	XLOC_019201	ISCW022644	DS915637:168392-180186	ISG	IL	OK	5.80285	3.27093	-0.827062	0.875693	0.381197	0.537095	no
XLOC_019206	XLOC_019206	ISCW022643	DS915637:94918-108245	ISG	IL	OK	25.8145	9.20575	-1.48758	1.5578	0.119281	0.241063	no
XLOC_019205	XLOC_019205	ISCW022641	DS915637:60184-76614	ISG	IL	OK	31.3268	36.1777	0.207704	-0.213108	0.831243	0.89789	no
XLOC_019199	XLOC_019199	ISCW022640	DS915637:56667-58038	ISG	IL	OK	2.90186	24.3774	3.07049	-3.21259	0.00131542	0.0129832	yes	overexpressed in IL
XLOC_019198	XLOC_019198	ISCW022639	DS915637:28581-55056	ISG	IL	OK	2.1289	1.26488	-0.751113	0.796632	0.425665	0.58099	no
XLOC_018979	XLOC_018979	ISCW022630	DS911923:195720-325151	ISG	IL	OK	1.87836	0	-1.79769e+308	-1.79769e+308	0.158655	0.285968	no
XLOC_018978	XLOC_018978	ISCW022629	DS911923:122418-139852	ISG	IL	OK	3.15418	4.52565	0.520862	-0.560138	0.575386	0.71357	no
XLOC_018974	XLOC_018974	ISCW022628	DS911923:119287-120522	ISG	IL	OK	1.8021	405.305	7.81318	-7.6044	2.86438e-14	2.1901e-11	yes	overexpressed in IL
XLOC_018973	XLOC_018973	ISCW022627	DS911923:88589-117929	ISG	IL	OK	0.550218	6.51304	3.56526	-3.66271	0.000249564	0.00388893	yes	overexpressed in IL
XLOC_018972	XLOC_018972	ISCW022626	DS911923:57329-67554	ISG	IL	OK	4.72665	11.3003	1.25747	-1.34994	0.177037	0.309093	no
XLOC_018971	XLOC_018971	ISCW022625	DS911923:42250-46715	ISG	IL	OK	15.1717	55.8726	1.88076	-1.98559	0.0470792	0.121885	no
XLOC_018970	XLOC_018970	ISCW022624	DS911923:33964-34656	ISG	IL	OK	1.25082	0	-1.79769e+308	-1.79769e+308	0.158655	0.285968	no
XLOC_017667	XLOC_017667	ISCW022620	DS891953:202816-209293	ISG	IL	OK	29.3943	2931.97	6.64019	-5.89872	3.6634e-09	6.17875e-07	yes	overexpressed in IL
XLOC_017664	XLOC_017664	ISCW022619	DS891953:89624-134575	ISG	IL	OK	6.63759	55.7165	3.06937	-2.92204	0.0034775	0.0256981	yes	overexpressed in IL
XLOC_018997	XLOC_018997	ISCW022614	DS912025:259178-264592	ISG	IL	OK	121.425	159.062	0.389513	-0.394737	0.693037	0.802621	no
XLOC_018991	XLOC_018991	ISCW022612	DS912025:196837-251000	ISG	IL	OK	51.3977	10.8371	-2.24573	2.1942	0.0282212	0.0878738	no
XLOC_018995	XLOC_018995	ISCW022611	DS912025:180737-195471	ISG	IL	OK	28.08	62.8843	1.16316	-1.21913	0.222794	0.366078	no
XLOC_018990	XLOC_018990	ISCW022609	DS912025:155768-180724	ISG	IL	OK	23.8115	34.1731	0.521201	-0.533734	0.593526	0.728432	no
XLOC_018993	XLOC_018993	ISCW022607	DS912025:130448-155024	ISG	IL	OK	5.36598	2.15657	-1.3151	1.37205	0.170048	0.29995	no
XLOC_018989	XLOC_018989	ISCW022606	DS912025:65328-127644	ISG	IL	OK	1.89839	0.549117	-1.78959	1.88038	0.0600558	0.147364	no
XLOC_018992	XLOC_018992	ISCW022605	DS912025:44700-54984	ISG	IL	OK	56.0852	26.703	-1.07062	1.13061	0.25822	0.409164	no
XLOC_018988	XLOC_018988	ISCW022604	DS912025:1802-35161	ISG	IL	OK	23.295	6.91772	-1.75165	1.78489	0.0742799	0.173083	no
XLOC_020158	XLOC_020158	ISCW022596	DS929532:62480-73420	ISG	IL	OK	4.29838	0.969159	-2.14899	1.75819	0.0787159	0.175622	no
XLOC_020157	XLOC_020157	ISCW022595	DS929532:12739-16476	ISG	IL	OK	7.83543	68.5879	3.12987	-3.17254	0.00151114	0.0142644	yes	overexpressed in IL
XLOC_020153	XLOC_020153	ISCW022594	DS929532:1257-2470	ISG	IL	OK	12.9318	56.8571	2.13641	-2.09647	0.0360405	0.102492	no
XLOC_017707	XLOC_017707	ISCW022593	DS892498:51998-75609	ISG	IL	OK	1.18254	1.64682	0.477793	-0.502759	0.615134	0.746084	no
XLOC_017706	XLOC_017706	ISCW022591	DS892498:9388-41644	ISG	IL	OK	11.2981	2.20113	-2.35977	2.44988	0.0142904	0.066059	no
XLOC_018021	XLOC_018021	ISCW022590	DS897039:38305-96191	ISG	IL	OK	1.12927	0.66837	-0.756672	0.777636	0.436784	0.591926	no
XLOC_018101	XLOC_018101	ISCW022587	DS899072:224355-237939	ISG	IL	OK	133.259	189.833	0.5105	-0.499887	0.617155	0.747603	no
XLOC_018100	XLOC_018100	ISCW022586	DS899072:215796-216261	ISG	IL	OK	7.52857	0	-1.79769e+308	-1.79769e+308	0.0162914	0.0672943	no
XLOC_018095	XLOC_018095	ISCW022585	DS899072:205733-214321	ISG	IL	OK	21.673	1.4429	-3.90886	3.80405	0.000142351	0.00261736	yes	overexpressed in ISG
XLOC_018099	XLOC_018099	ISCW022584	DS899072:203213-203621	ISG	IL	OK	82.222	62.6139	-0.393041	0.408614	0.682823	0.796256	no
XLOC_018098	XLOC_018098	ISCW022583	DS899072:146528-181841	ISG	IL	OK	2.94228	0	-1.79769e+308	-1.79769e+308	0.0142518	0.066059	no
XLOC_018097	XLOC_018097	ISCW022582	DS899072:99712-100503	ISG	IL	OK	4.20415	0	-1.79769e+308	-1.79769e+308	0.0416323	0.11081	no
XLOC_018096	XLOC_018096	ISCW022581	DS899072:8357-16904	ISG	IL	OK	6.07567	0	-1.79769e+308	-1.79769e+308	0.0194737	0.0705669	no
XLOC_018177	XLOC_018177	ISCW022580	DS899798:416802-420242	ISG	IL	OK	17.3565	6.60383	-1.3941	1.45132	0.146691	0.281057	no
XLOC_018176	XLOC_018176	ISCW022577	DS899798:341152-405827	ISG	IL	OK	11.6163	3.68315	-1.65714	1.64802	0.0993494	0.209378	no
XLOC_019818	XLOC_019818	ISCW022569	DS924847:58309-78232	ISG	IL	OK	2.9322	0.708347	-2.04945	1.2732	0.202947	0.342495	no
XLOC_019817	XLOC_019817	ISCW022568	DS924847:4249-13163	ISG	IL	OK	3.03739	3.66879	0.272474	-0.260683	0.794337	0.874808	no
XLOC_018069	XLOC_018069	ISCW022566	DS898406:152207-153308	ISG	IL	OK	16.7024	1.85546	-3.17021	3.22819	0.00124578	0.0126106	yes	overexpressed in ISG
XLOC_018068	XLOC_018068	ISCW022565	DS898406:145152-145617	ISG	IL	OK	3.39022	2.14986	-0.657137	0.604531	0.545491	0.688482	no
XLOC_018067	XLOC_018067	ISCW022564	DS898406:72838-108546	ISG	IL	OK	39.505	1.38534	-4.83373	4.81918	1.44149e-06	7.91591e-05	yes	overexpressed in ISG
XLOC_018066	XLOC_018066	ISCW022563	DS898406:51999-62239	ISG	IL	OK	7.02663	0	-1.79769e+308	-1.79769e+308	0.0154857	0.0668948	no
XLOC_020098	XLOC_020098	ISCW022561	DS928874:337980-374084	ISG	IL	OK	3.0277	2.55996	-0.242099	0.255743	0.798149	0.876547	no
XLOC_020096	XLOC_020096	ISCW022557	DS928874:180238-181978	ISG	IL	OK	0	45.3176	1.79769e+308	1.79769e+308	0.014718	0.066059	no
XLOC_017937	XLOC_017937	ISCW022554	DS896168:194273-201329	ISG	IL	OK	0	1.98738	1.79769e+308	1.79769e+308	0.0416323	0.11081	no
XLOC_017929	XLOC_017929	ISCW022552	DS896168:156948-159355	ISG	IL	OK	8.08112	15.1039	0.902291	-0.967776	0.333156	0.489171	no
XLOC_017935	XLOC_017935	ISCW022551	DS896168:138448-149814	ISG	IL	OK	9.63717	6.62614	-0.54044	0.572464	0.567007	0.706709	no
XLOC_017928	XLOC_017928	ISCW022550	DS896168:130933-137194	ISG	IL	OK	36.0835	50.8485	0.494866	-0.522643	0.601222	0.733711	no
XLOC_017927	XLOC_017927	ISCW022548	DS896168:115479-129178	ISG	IL	OK	5.34093	1.80633	-1.56403	1.64476	0.100019	0.210597	no
XLOC_017933	XLOC_017933	ISCW022547	DS896168:108043-114745	ISG	IL	OK	12.6861	18.5272	0.546397	-0.567645	0.570276	0.709843	no
XLOC_017926	XLOC_017926	ISCW022546	DS896168:68736-106292	ISG	IL	OK	4.55746	3.98861	-0.192346	0.201682	0.840165	0.905115	no
XLOC_017932	XLOC_017932	ISCW022545	DS896168:55608-67445	ISG	IL	OK	4.39564	0.857672	-2.35758	2.21986	0.026428	0.0845711	no
XLOC_017923	XLOC_017923	ISCW022542	DS896168:20201-31356	ISG	IL	OK	6.74539	10.3959	0.624045	-0.658083	0.510485	0.658651	no
XLOC_018832	XLOC_018832	ISCW022537	DS909780:827429-876412	ISG	IL	OK	1.25285	0.353101	-1.82706	1.8164	0.0693094	0.164204	no
XLOC_018835	XLOC_018835	ISCW022535	DS909780:669699-687597	ISG	IL	OK	36.0664	0.910288	-5.30819	5.25718	1.46285e-07	1.26146e-05	yes	overexpressed in ISG
XLOC_020110	XLOC_020110	ISCW022524	DS928928:66445-111693	ISG	IL	OK	1.70563	11.7879	2.78893	-2.94623	0.0032167	0.0243997	yes	overexpressed in IL
XLOC_020108	XLOC_020108	ISCW022523	DS928928:21269-57966	ISG	IL	OK	74.9968	12.7824	-2.55267	2.52496	0.0115712	0.0604051	no
XLOC_020142	XLOC_020142	ISCW022517	DS929376:43219-46624	ISG	IL	OK	122.791	384.576	1.64706	-1.5173	0.129191	0.255596	no
XLOC_020141	XLOC_020141	ISCW022516	DS929376:5945-41229	ISG	IL	OK	2.64922	1.86178	-0.508886	0.541448	0.588199	0.72468	no
XLOC_018132	XLOC_018132	ISCW022507	DS899359:1613910-1701018	ISG	IL	OK	0.460518	4.98525	3.43634	-3.41	0.000649629	0.0078001	yes	overexpressed in IL
XLOC_018131	XLOC_018131	ISCW022506	DS899359:1586978-1604075	ISG	IL	OK	0.0946667	8.32437	6.45834	-4.06828	4.73623e-05	0.00116316	yes	overexpressed in IL
XLOC_018130	XLOC_018130	ISCW022505	DS899359:1550035-1576027	ISG	IL	OK	0.434767	6.17661	3.8285	-3.79442	0.000147991	0.00267292	yes	overexpressed in IL
XLOC_018129	XLOC_018129	ISCW022504	DS899359:1526876-1534841	ISG	IL	OK	0.28884	14.6531	5.66479	-3.57286	0.000353105	0.00496903	yes	overexpressed in IL
XLOC_018128	XLOC_018128	ISCW022502	DS899359:1476427-1499857	ISG	IL	OK	1.79217	3.5357	0.980293	-1.0225	0.306546	0.463883	no
XLOC_018127	XLOC_018127	ISCW022501	DS899359:1405826-1423019	ISG	IL	OK	0.208987	4.59423	4.45834	-2.79904	0.00512555	0.0336106	yes	overexpressed in IL
XLOC_018125	XLOC_018125	ISCW022497	DS899359:1297501-1315640	ISG	IL	OK	0.0892344	1.96167	4.45834	-2.79904	0.00512555	0.0336106	yes	overexpressed in IL
XLOC_018124	XLOC_018124	ISCW022496	DS899359:1263319-1266856	ISG	IL	OK	1.92735	0	-1.79769e+308	-1.79769e+308	0.158655	0.285968	no
XLOC_018123	XLOC_018123	ISCW022495	DS899359:1232144-1253569	ISG	IL	OK	0.1403	1.89801	3.7579	-2.34448	0.0190534	0.0705669	no
XLOC_018141	XLOC_018141	ISCW022491	DS899359:1081357-1085592	ISG	IL	OK	0.42433	3.39044	2.99822	-0.533287	0.593835	0.728606	no
XLOC_018139	XLOC_018139	ISCW022489	DS899359:1026195-1031634	ISG	IL	OK	7.76265	4.83621	-0.682672	0.723433	0.469414	0.619529	no
XLOC_018138	XLOC_018138	ISCW022488	DS899359:871432-876681	ISG	IL	OK	39.3781	8.32368	-2.2421	2.11161	0.0347197	0.0999248	no
XLOC_018121	XLOC_018121	ISCW022487	DS899359:771027-837450	ISG	IL	OK	48.71	12.0034	-2.02077	1.88322	0.0596702	0.146575	no
XLOC_018120	XLOC_018120	ISCW022486	DS899359:716244-721716	ISG	IL	OK	34.4657	0	-1.79769e+308	-1.79769e+308	0.0143092	0.066059	no
XLOC_018119	XLOC_018119	ISCW022485	DS899359:650340-690056	ISG	IL	OK	124.583	2.42153	-5.68504	3.56901	0.000358328	0.00501179	yes	overexpressed in ISG
XLOC_018661	XLOC_018661	ISCW022481	DS907896:230933-232217	ISG	IL	OK	0.910603	6.6727	2.87338	-2.99243	0.00276763	0.0219579	yes	overexpressed in IL
XLOC_018660	XLOC_018660	ISCW022480	DS907896:228643-229660	ISG	IL	OK	7.35989	3.66052	-1.00763	1.0558	0.291058	0.445739	no
XLOC_018658	XLOC_018658	ISCW022478	DS907896:182660-187996	ISG	IL	OK	49.2305	41.2501	-0.255155	0.260516	0.794466	0.874866	no
XLOC_018665	XLOC_018665	ISCW022477	DS907896:170353-178487	ISG	IL	OK	12.4931	1.24271	-3.32956	3.36327	0.00077025	0.00881937	yes	overexpressed in ISG
XLOC_018664	XLOC_018664	ISCW022475	DS907896:133299-153916	ISG	IL	OK	37.743	9.97733	-1.91948	1.89764	0.0577441	0.143195	no
XLOC_018656	XLOC_018656	ISCW022473	DS907896:97756-104710	ISG	IL	OK	12.9579	8.19144	-0.661638	0.697474	0.485506	0.633622	no
XLOC_018662	XLOC_018662	ISCW022472	DS907896:59366-81157	ISG	IL	OK	2.2144	0.748767	-1.56433	1.61108	0.107162	0.222381	no
XLOC_018655	XLOC_018655	ISCW022471	DS907896:46518-52573	ISG	IL	OK	1.45873	1.6445	0.172938	-0.131313	0.895528	0.935505	no
XLOC_018654	XLOC_018654	ISCW022470	DS907896:1296-43206	ISG	IL	OK	10.7781	5.17385	-1.05879	1.08015	0.280075	0.433726	no
XLOC_017958	XLOC_017958	ISCW022469	DS896468:659325-662519	ISG	IL	OK	8.12248	21.9112	1.43167	-1.52573	0.127076	0.252265	no
XLOC_017964	XLOC_017964	ISCW022468	DS896468:456159-461753	ISG	IL	OK	7.96078	2.40391	-1.72753	1.71428	0.0864779	0.189097	no
XLOC_017956	XLOC_017956	ISCW022464	DS896468:261893-271032	ISG	IL	OK	26.1499	62.6894	1.26142	-1.31576	0.188254	0.324821	no
XLOC_017955	XLOC_017955	ISCW022463	DS896468:228894-233305	ISG	IL	OK	13.1285	6.578	-0.996987	1.03842	0.299076	0.455283	no
XLOC_017954	XLOC_017954	ISCW022462	DS896468:218710-219966	ISG	IL	OK	2.28663	1.41161	-0.695885	0.712506	0.476151	0.626259	no
XLOC_017953	XLOC_017953	ISCW022461	DS896468:166543-171325	ISG	IL	OK	1.28636	0	-1.79769e+308	-1.79769e+308	0.0416323	0.11081	no
XLOC_017952	XLOC_017952	ISCW022460	DS896468:157929-159836	ISG	IL	OK	1.4917	0	-1.79769e+308	-1.79769e+308	0.0293909	0.0878738	no
XLOC_017951	XLOC_017951	ISCW022459	DS896468:156043-156364	ISG	IL	OK	1.89285	0.800218	-1.2421	0.405859	0.684846	0.797441	no
XLOC_017950	XLOC_017950	ISCW022458	DS896468:132831-151209	ISG	IL	OK	2.36964	1.127	-1.07217	1.06594	0.286452	0.440746	no
XLOC_017961	XLOC_017961	ISCW022457	DS896468:86735-87185	ISG	IL	OK	1.80024	5.32744	1.56526	-1.54224	0.123014	0.24584	no
XLOC_017959	XLOC_017959	ISCW022454	DS896468:49811-50267	ISG	IL	OK	4.83081	6.68376	0.468394	-0.479891	0.631305	0.756576	no
XLOC_017948	XLOC_017948	ISCW022453	DS896468:7116-23322	ISG	IL	OK	2.83201	0.532112	-2.41202	1.98004	0.0476992	0.123129	no
XLOC_019838	XLOC_019838	ISCW022452	DS925249:369884-375665	ISG	IL	OK	11.6017	1.30792	-3.14899	1.97794	0.0479357	0.123406	no
XLOC_017974	XLOC_017974	ISCW022448	DS896564:109356-120384	ISG	IL	OK	13.9328	6.25017	-1.15652	1.2236	0.221103	0.36382	no
XLOC_019917	XLOC_019917	ISCW022443	DS926264:650322-657346	ISG	IL	OK	3.91517	0	-1.79769e+308	-1.79769e+308	0.014718	0.066059	no
XLOC_019916	XLOC_019916	ISCW022442	DS926264:596226-597482	ISG	IL	OK	0.831053	63.2401	6.24975	-6.25597	3.95048e-10	9.43919e-08	yes	overexpressed in IL
XLOC_019131	XLOC_019131	ISCW022430	DS914689:153554-157102	ISG	IL	OK	5.27309	1.33754	-1.97906	1.86103	0.0627406	0.152372	no
XLOC_019127	XLOC_019127	ISCW022429	DS914689:149765-151159	ISG	IL	OK	2.01944	6.05375	1.58387	-1.69992	0.0891457	0.192762	no
XLOC_019125	XLOC_019125	ISCW022426	DS914689:46125-56619	ISG	IL	OK	6.62345	4.03216	-0.71603	0.746048	0.455638	0.607288	no
XLOC_019130	XLOC_019130	ISCW022425	DS914689:21529-23768	ISG	IL	OK	1.10375	0	-1.79769e+308	-1.79769e+308	0.0416323	0.11081	no
XLOC_018728	XLOC_018728	ISCW022414	DS908885:198351-203400	ISG	IL	OK	10.7064	0.920582	-3.53978	3.32252	0.000892086	0.00980953	yes	overexpressed in ISG
XLOC_018727	XLOC_018727	ISCW022413	DS908885:173098-184268	ISG	IL	OK	18.9177	0.635571	-4.89554	4.51937	6.20225e-06	0.000252247	yes	overexpressed in ISG
XLOC_018737	XLOC_018737	ISCW022410	DS908885:11566-38104	ISG	IL	OK	3.24857	0.264107	-3.62061	3.53852	0.000402372	0.0054641	yes	overexpressed in ISG
XLOC_018736	XLOC_018736	ISCW022409	DS908885:4574-11480	ISG	IL	OK	4.82334	22.5242	2.22337	-2.24124	0.0250104	0.081979	no
XLOC_020282	XLOC_020282	ISCW022405	DS931786:549823-623065	ISG	IL	OK	3.76394	0.53041	-2.82706	2.92783	0.00341341	0.025306	yes	overexpressed in ISG
XLOC_020291	XLOC_020291	ISCW022402	DS931786:529616-548684	ISG	IL	OK	6.5269	1.98103	-1.72015	1.80566	0.0709709	0.166975	no
XLOC_020279	XLOC_020279	ISCW022401	DS931786:498855-525923	ISG	IL	OK	38.2006	30.2565	-0.336349	0.333147	0.739023	0.834402	no
XLOC_020290	XLOC_020290	ISCW022400	DS931786:475487-498710	ISG	IL	OK	16.9143	2.52376	-2.7446	2.84153	0.00448974	0.0305414	yes	overexpressed in ISG
XLOC_020278	XLOC_020278	ISCW022399	DS931786:442134-461662	ISG	IL	OK	0.361268	3.56367	3.30222	-3.28352	0.00102519	0.0108894	yes	overexpressed in IL
XLOC_020275	XLOC_020275	ISCW022391	DS931786:292330-312679	ISG	IL	OK	1.94224	9.33457	2.26486	-2.41826	0.0155948	0.0672341	no
XLOC_020274	XLOC_020274	ISCW022389	DS931786:273467-277466	ISG	IL	OK	0.997204	181.465	7.50758	-7.35546	1.90292e-13	1.21248e-10	yes	overexpressed in IL
XLOC_020284	XLOC_020284	ISCW022386	DS931786:74360-99212	ISG	IL	OK	5.60324	5.07602	-0.142563	0.151111	0.879888	0.928888	no
XLOC_020283	XLOC_020283	ISCW022385	DS931786:40835-70980	ISG	IL	OK	5.03442	4.50707	-0.159637	0.16915	0.865678	0.920083	no
XLOC_019867	XLOC_019867	ISCW022380	DS925671:108414-117669	ISG	IL	OK	1.44109	11.2707	2.96735	-3.12664	0.00176816	0.015708	yes	overexpressed in IL
XLOC_017862	XLOC_017862	ISCW022376	DS895157:130407-130773	ISG	IL	OK	0.687647	5.81416	3.07983	-1.88689	0.0591748	0.145545	no
XLOC_020249	XLOC_020249	ISCW022372	DS930924:154040-165343	ISG	IL	OK	10.309	10.4566	0.0205208	-0.0219318	0.982502	0.989578	no
XLOC_020246	XLOC_020246	ISCW022371	DS930924:137967-148804	ISG	IL	OK	0.147726	14.7387	6.64054	-4.18096	2.90277e-05	0.00081002	yes	overexpressed in IL
XLOC_020245	XLOC_020245	ISCW022368	DS930924:106615-119043	ISG	IL	OK	4.08561	3.79988	-0.104596	0.11016	0.912282	0.946532	no
XLOC_020244	XLOC_020244	ISCW022367	DS930924:98239-104899	ISG	IL	OK	13.7262	4.345	-1.65951	1.72699	0.0841698	0.185322	no
XLOC_020243	XLOC_020243	ISCW022366	DS930924:23738-31742	ISG	IL	OK	1.29839	0	-1.79769e+308	-1.79769e+308	0.0216541	0.0754501	no
XLOC_019772	XLOC_019772	ISCW022359	DS924441:63901-78649	ISG	IL	OK	0.669246	2.51492	1.9099	-1.98549	0.0470899	0.121885	no
XLOC_019771	XLOC_019771	ISCW022358	DS924441:52629-58386	ISG	IL	OK	1.79208	24.0543	3.74659	-3.90556	9.40083e-05	0.00195677	yes	overexpressed in IL
XLOC_018672	XLOC_018672	ISCW022338	DS907938:30107-31982	ISG	IL	OK	5.6162	0.55216	-3.34644	3.28442	0.00102191	0.0108723	yes	overexpressed in ISG
XLOC_019387	XLOC_019387	ISCW022331	DS919778:137978-147326	ISG	IL	OK	31.2148	0	-1.79769e+308	-1.79769e+308	0.017132	0.0678946	no
XLOC_019386	XLOC_019386	ISCW022330	DS919778:128982-129921	ISG	IL	OK	12.8087	1.76301	-2.86101	2.91234	0.00358728	0.0262221	yes	overexpressed in ISG
XLOC_019385	XLOC_019385	ISCW022329	DS919778:59079-80463	ISG	IL	OK	22.4179	90.3174	2.01035	-1.97172	0.0486417	0.124776	no
XLOC_019381	XLOC_019381	ISCW022328	DS919778:50649-56409	ISG	IL	OK	69.2696	109.614	0.662142	-0.658706	0.510085	0.658357	no
XLOC_019384	XLOC_019384	ISCW022327	DS919778:40881-46252	ISG	IL	OK	4.03246	18.4682	2.19531	-2.34291	0.0191343	0.0705669	no
XLOC_019380	XLOC_019380	ISCW022325	DS919778:11540-38368	ISG	IL	OK	82.2233	16.3472	-2.3305	2.25429	0.0241777	0.0799261	no
XLOC_017857	XLOC_017857	ISCW022320	DS894858:14001-69980	ISG	IL	OK	0.263655	4.01263	3.92783	-2.45031	0.0142735	0.066059	no
XLOC_019157	XLOC_019157	ISCW022317	DS915154:228137-242135	ISG	IL	OK	81.6001	15.332	-2.41202	2.50611	0.0122069	0.0625842	no
XLOC_019154	XLOC_019154	ISCW022316	DS915154:192106-193324	ISG	IL	OK	6.68302	0.546831	-3.61133	3.38803	0.000703962	0.00824692	yes	overexpressed in ISG
XLOC_018784	XLOC_018784	ISCW022309	DS909431:5057-5378	ISG	IL	OK	26.5	9.60261	-1.46449	1.45658	0.145232	0.2791	no
XLOC_018075	XLOC_018075	ISCW022307	DS898493:142578-162106	ISG	IL	OK	66.9608	4.97726	-3.74989	3.80027	0.000144541	0.00263179	yes	overexpressed in ISG
XLOC_018074	XLOC_018074	ISCW022306	DS898493:124646-124937	ISG	IL	OK	75.5469	2.09429	-5.17284	3.25647	0.00112805	0.0117295	yes	overexpressed in ISG
XLOC_018078	XLOC_018078	ISCW022305	DS898493:85426-104178	ISG	IL	OK	1.4917	0.504501	-1.56403	0.958219	0.337952	0.493064	no
XLOC_018076	XLOC_018076	ISCW022303	DS898493:32653-61450	ISG	IL	OK	3.11685	0.351379	-3.14899	1.97794	0.0479357	0.123406	no
XLOC_018478	XLOC_018478	ISCW022300	DS904056:277913-279940	ISG	IL	OK	1.91511	5.56618	1.53926	-1.64779	0.0993954	0.209399	no
XLOC_018477	XLOC_018477	ISCW022299	DS904056:209639-256356	ISG	IL	OK	46.7012	23.1061	-1.01518	0.998939	0.317824	0.474453	no
XLOC_018480	XLOC_018480	ISCW022298	DS904056:102709-117244	ISG	IL	OK	4.96398	1.717	-1.53161	1.59367	0.111011	0.228006	no
XLOC_018372	XLOC_018372	ISCW022289	DS903297:32898-36734	ISG	IL	OK	0	6.90189	1.79769e+308	1.79769e+308	0.0227501	0.0762482	no
XLOC_019481	XLOC_019481	ISCW022284	DS921134:832793-858757	ISG	IL	OK	29.5793	2.89369	-3.35361	3.44174	0.000577985	0.00717414	yes	overexpressed in ISG
XLOC_019467	XLOC_019467	ISCW022282	DS921134:820319-826939	ISG	IL	OK	24.8781	28.773	0.209837	-0.219808	0.82602	0.895513	no
XLOC_019480	XLOC_019480	ISCW022281	DS921134:813534-814800	ISG	IL	OK	4.01309	0.696025	-2.5275	2.58754	0.00966638	0.0533119	no
XLOC_019479	XLOC_019479	ISCW022280	DS921134:738596-753356	ISG	IL	OK	8.19755	1.01431	-3.01469	2.96855	0.00299212	0.0232655	yes	overexpressed in ISG
XLOC_019476	XLOC_019476	ISCW022276	DS921134:519813-597274	ISG	IL	OK	8.9609	2.07403	-2.11121	2.16863	0.0301104	0.0896745	no
XLOC_019475	XLOC_019475	ISCW022274	DS921134:477330-492428	ISG	IL	OK	38.4783	68.8851	0.840149	-0.829475	0.406836	0.563119	no
XLOC_019464	XLOC_019464	ISCW022273	DS921134:457047-474172	ISG	IL	OK	19.5539	6.82656	-1.51822	1.58856	0.11216	0.229843	no
XLOC_019463	XLOC_019463	ISCW022272	DS921134:448992-450545	ISG	IL	OK	12.1412	2.46371	-2.30101	2.39546	0.0165997	0.0678946	no
XLOC_019474	XLOC_019474	ISCW022271	DS921134:426132-434427	ISG	IL	OK	225.324	166.634	-0.435318	0.425664	0.670353	0.78833	no
XLOC_019462	XLOC_019462	ISCW022270	DS921134:412271-425447	ISG	IL	OK	63.7116	179.831	1.49701	-1.37596	0.168835	0.298316	no
XLOC_019473	XLOC_019473	ISCW022269	DS921134:390998-407575	ISG	IL	OK	20.9795	1.54808	-3.76042	3.83277	0.000126709	0.00241801	yes	overexpressed in ISG
XLOC_019472	XLOC_019472	ISCW022268	DS921134:387978-389308	ISG	IL	OK	18.7267	33.6363	0.844924	-0.854515	0.39282	0.549019	no
XLOC_019461	XLOC_019461	ISCW022267	DS921134:358513-387750	ISG	IL	OK	47.4081	31.2069	-0.60327	0.572347	0.567087	0.706717	no
XLOC_019460	XLOC_019460	ISCW022266	DS921134:353898-357350	ISG	IL	OK	36.9062	55.432	0.586855	-0.599097	0.549108	0.691905	no
XLOC_019471	XLOC_019471	ISCW022265	DS921134:351903-352274	ISG	IL	OK	2144.24	3866.71	0.850636	-0.853584	0.393335	0.549521	no
XLOC_019459	XLOC_019459	ISCW022264	DS921134:341379-348509	ISG	IL	OK	29.3196	55.3792	0.917477	-0.930946	0.351882	0.507575	no
XLOC_019458	XLOC_019458	ISCW022263	DS921134:322105-334619	ISG	IL	OK	19.3111	5.90579	-1.70923	1.79585	0.0725185	0.169772	no
XLOC_019470	XLOC_019470	ISCW022262	DS921134:269506-276784	ISG	IL	OK	36.3396	7.37416	-2.30099	2.3871	0.016982	0.0678946	no
XLOC_019457	XLOC_019457	ISCW022261	DS921134:258202-267224	ISG	IL	OK	103.789	81.1465	-0.355052	0.350082	0.726277	0.824884	no
XLOC_019456	XLOC_019456	ISCW022259	DS921134:225668-255051	ISG	IL	OK	25.426	12.2846	-1.04945	1.07977	0.280247	0.433881	no
XLOC_019455	XLOC_019455	ISCW022258	DS921134:145831-177052	ISG	IL	OK	30.0345	7.8975	-1.92715	1.97502	0.0482662	0.124006	no
XLOC_019468	XLOC_019468	ISCW022257	DS921134:67602-68702	ISG	IL	OK	8.46563	0	-1.79769e+308	-1.79769e+308	0.0162914	0.0672943	no
XLOC_019565	XLOC_019565	ISCW022256	DS921995:1059601-1060351	ISG	IL	OK	1.6071	0	-1.79769e+308	-1.79769e+308	0.0194336	0.0705669	no
XLOC_019562	XLOC_019562	ISCW022253	DS921995:933634-943599	ISG	IL	OK	0.0999701	11.3265	6.82399	-4.29319	1.76123e-05	0.000570609	yes	overexpressed in IL
XLOC_019560	XLOC_019560	ISCW022248	DS921995:776825-801062	ISG	IL	OK	18.5685	8.22377	-1.17498	1.22595	0.220218	0.362728	no
XLOC_019557	XLOC_019557	ISCW022243	DS921995:635610-651878	ISG	IL	OK	16.0528	37.8395	1.23707	-1.25197	0.210582	0.350338	no
XLOC_019572	XLOC_019572	ISCW022242	DS921995:629459-631559	ISG	IL	OK	16.9162	9.82713	-0.78356	0.797539	0.425138	0.58069	no
XLOC_019571	XLOC_019571	ISCW022241	DS921995:611193-624764	ISG	IL	OK	16.7517	2.0234	-3.04945	3.00524	0.00265371	0.0213432	yes	overexpressed in ISG
XLOC_019556	XLOC_019556	ISCW022240	DS921995:525807-533761	ISG	IL	OK	15.0583	3.61315	-2.05924	2.14942	0.0316007	0.0929019	no
XLOC_019185	XLOC_019185	ISCW022231	DS915406:609873-617064	ISG	IL	OK	25.9143	72.8009	1.49021	-1.51931	0.128683	0.254724	no
XLOC_019179	XLOC_019179	ISCW022230	DS915406:591948-595352	ISG	IL	OK	2.7003	0	-1.79769e+308	-1.79769e+308	0.0227501	0.0762482	no
XLOC_019178	XLOC_019178	ISCW022229	DS915406:565132-582060	ISG	IL	OK	5.77151	2.21813	-1.3796	1.44295	0.149035	0.284832	no
XLOC_019177	XLOC_019177	ISCW022224	DS915406:146086-152176	ISG	IL	OK	0	12.0797	1.79769e+308	1.79769e+308	0.158655	0.285968	no
XLOC_019180	XLOC_019180	ISCW022223	DS915406:95632-98574	ISG	IL	OK	3.33467	48.4955	3.86224	-3.82715	0.000129634	0.00245939	yes	overexpressed in IL
XLOC_019176	XLOC_019176	ISCW022222	DS915406:62790-63588	ISG	IL	OK	0	4.05682	1.79769e+308	1.79769e+308	0.0162914	0.0672943	no
XLOC_018646	XLOC_018646	ISCW022220	DS907465:168040-169139	ISG	IL	OK	39.8003	15.8911	-1.32456	1.40074	0.161293	0.288278	no
XLOC_018644	XLOC_018644	ISCW022217	DS907465:68923-80656	ISG	IL	OK	40.9133	17.4393	-1.23023	1.2706	0.203872	0.343472	no
XLOC_018642	XLOC_018642	ISCW022216	DS907465:20931-38702	ISG	IL	OK	7.45085	1.95994	-1.9266	2.01518	0.0438855	0.115813	no
XLOC_018160	XLOC_018160	ISCW022213	DS899629:67692-114192	ISG	IL	OK	25.7395	2.61812	-3.29738	3.36596	0.000762776	0.00876581	yes	overexpressed in ISG
XLOC_018489	XLOC_018489	ISCW022212	DS904186:380516-387075	ISG	IL	OK	0.846309	14.3113	4.07983	-3.84436	0.000120867	0.00234555	yes	overexpressed in IL
XLOC_018488	XLOC_018488	ISCW022211	DS904186:259370-259745	ISG	IL	OK	2.30448	0	-1.79769e+308	-1.79769e+308	0.0416323	0.11081	no
XLOC_018487	XLOC_018487	ISCW022210	DS904186:216806-218977	ISG	IL	OK	15.6273	0	-1.79769e+308	-1.79769e+308	0.0140772	0.066059	no
XLOC_019313	XLOC_019313	ISCW022207	DS918149:251564-273092	ISG	IL	OK	22.5494	4.26847	-2.4013	2.492	0.0127025	0.0641608	no
XLOC_019310	XLOC_019310	ISCW022205	DS918149:236581-245280	ISG	IL	OK	2.47317	5.22775	1.07983	-1.02812	0.303895	0.460601	no
XLOC_019312	XLOC_019312	ISCW022203	DS918149:175085-177599	ISG	IL	OK	4.94593	0	-1.79769e+308	-1.79769e+308	0.0786496	0.175622	no
XLOC_019289	XLOC_019289	ISCW022197	DS917683:135800-172799	ISG	IL	OK	1.64003	3.328	1.02094	-0.94753	0.343369	0.498493	no
XLOC_019287	XLOC_019287	ISCW022193	DS917683:1741-70516	ISG	IL	OK	2.9339	0.515461	-2.50889	2.59018	0.00959268	0.053149	no
XLOC_019067	XLOC_019067	ISCW022192	DS913224:271087-274176	ISG	IL	OK	32.8329	12.3381	-1.41202	1.14196	0.25347	0.403981	no
XLOC_019066	XLOC_019066	ISCW022190	DS913224:176002-209586	ISG	IL	OK	17.9745	4.70033	-1.93512	2.01701	0.0436947	0.115363	no
XLOC_019060	XLOC_019060	ISCW022189	DS913224:151339-172045	ISG	IL	OK	5.32348	31.8615	2.58138	-2.63184	0.00849231	0.0485952	yes	overexpressed in IL
XLOC_019059	XLOC_019059	ISCW022186	DS913224:68208-77057	ISG	IL	OK	8.78045	3.26656	-1.42652	1.50172	0.133169	0.260812	no
XLOC_019062	XLOC_019062	ISCW022184	DS913224:22356-66764	ISG	IL	OK	21.0989	38.9028	0.882707	-0.875106	0.381516	0.537412	no
XLOC_019858	XLOC_019858	ISCW022182	DS925508:163251-165541	ISG	IL	OK	69.6365	9.5849	-2.86101	2.94997	0.00317804	0.0241704	yes	overexpressed in ISG
XLOC_019857	XLOC_019857	ISCW022181	DS925508:145077-162616	ISG	IL	OK	83.3801	265.408	1.67044	-1.70204	0.0887485	0.192266	no
XLOC_019860	XLOC_019860	ISCW022180	DS925508:141231-141833	ISG	IL	OK	6.4877	0.995092	-2.70481	1.69591	0.0899028	0.193997	no
XLOC_019859	XLOC_019859	ISCW022179	DS925508:126960-140306	ISG	IL	OK	1.83708	3.51657	0.936757	-0.988131	0.323089	0.478319	no
XLOC_018877	XLOC_018877	ISCW022177	DS910653:769516-785882	ISG	IL	OK	80.9336	30.3275	-1.41611	1.40168	0.161011	0.288087	no
XLOC_018884	XLOC_018884	ISCW022176	DS910653:767654-768965	ISG	IL	OK	11.8441	7.34388	-0.689558	0.724435	0.468799	0.618931	no
XLOC_018883	XLOC_018883	ISCW022174	DS910653:733250-760888	ISG	IL	OK	13.7002	41.3594	1.59401	-1.61179	0.107007	0.222128	no
XLOC_018875	XLOC_018875	ISCW022173	DS910653:704919-733182	ISG	IL	OK	15.2961	104.597	2.77361	-2.63969	0.00829825	0.0477774	yes	overexpressed in IL
XLOC_018874	XLOC_018874	ISCW022171	DS910653:637136-680401	ISG	IL	OK	1.45239	0.334913	-2.11657	1.99275	0.0462884	0.12044	no
XLOC_018873	XLOC_018873	ISCW022169	DS910653:587891-605535	ISG	IL	OK	1.81439	0.354021	-2.35758	2.21986	0.026428	0.0845711	no
XLOC_018880	XLOC_018880	ISCW022167	DS910653:365225-376038	ISG	IL	OK	235.397	91.5407	-1.36261	1.32058	0.186642	0.322671	no
XLOC_018871	XLOC_018871	ISCW022165	DS910653:343485-345010	ISG	IL	OK	27.9396	61.6442	1.14166	-1.12697	0.259755	0.410868	no
XLOC_018870	XLOC_018870	ISCW022164	DS910653:321839-343146	ISG	IL	OK	109.902	23.3552	-2.2344	2.23181	0.0256275	0.0833567	no
XLOC_018879	XLOC_018879	ISCW022163	DS910653:151774-173915	ISG	IL	OK	1.15041	0	-1.79769e+308	-1.79769e+308	0.0416323	0.11081	no
XLOC_018869	XLOC_018869	ISCW022161	DS910653:68715-107799	ISG	IL	OK	2.04716	22.1555	3.43597	-3.40927	0.000651362	0.0078001	yes	overexpressed in IL
XLOC_018352	XLOC_018352	ISCW022159	DS902926:97967-104035	ISG	IL	OK	4.27438	1.48814	-1.52221	1.5685	0.116764	0.23731	no
XLOC_018351	XLOC_018351	ISCW022158	DS902926:28278-64859	ISG	IL	OK	15.1391	5.04447	-1.58551	1.58267	0.113498	0.231826	no
XLOC_020268	XLOC_020268	ISCW022157	DS931589:184763-196961	ISG	IL	OK	90.4089	447.349	2.30687	-2.19218	0.0283664	0.0878738	no
XLOC_020263	XLOC_020263	ISCW022155	DS931589:162701-163547	ISG	IL	OK	1.36523	2.02006	0.565256	-0.565951	0.571427	0.710813	no
XLOC_020262	XLOC_020262	ISCW022154	DS931589:134357-158741	ISG	IL	OK	1.51626	2.22217	0.55145	-0.578407	0.562989	0.702909	no
XLOC_020267	XLOC_020267	ISCW022153	DS931589:4008-133777	ISG	IL	OK	63.8638	58.1411	-0.135438	0.127832	0.898282	0.93769	no
XLOC_020261	XLOC_020261	ISCW022151	DS931589:4008-133777	ISG	IL	OK	1.18936	3.04448	1.35601	-1.35912	0.174108	0.305141	no
XLOC_020266	XLOC_020266	ISCW022150	DS931589:2412-3192	ISG	IL	OK	13.8961	48.9271	1.81595	-1.88486	0.0594489	0.146094	no
XLOC_020265	XLOC_020265	ISCW022149	DS931589:197-551	ISG	IL	OK	12.6376	64.0588	2.34168	-2.49039	0.0127602	0.0643565	no
XLOC_019237	XLOC_019237	ISCW022147	DS916551:204076-215855	ISG	IL	OK	1.82567	0	-1.79769e+308	-1.79769e+308	0.017132	0.0678946	no
XLOC_019236	XLOC_019236	ISCW022146	DS916551:123124-135695	ISG	IL	OK	7.41137	26.9825	1.86421	-1.86941	0.0615659	0.150234	no
XLOC_019240	XLOC_019240	ISCW022145	DS916551:101538-122523	ISG	IL	OK	13.9363	2.4171	-2.5275	2.61802	0.00884424	0.050017	no
XLOC_019235	XLOC_019235	ISCW022144	DS916551:91306-95033	ISG	IL	OK	77.3263	46.5402	-0.732482	0.679297	0.49695	0.645618	no
XLOC_019239	XLOC_019239	ISCW022143	DS916551:48680-65155	ISG	IL	OK	7.41532	8.70799	0.231832	-0.239084	0.81104	0.885129	no
XLOC_019047	XLOC_019047	ISCW022135	DS913072:308049-310056	ISG	IL	OK	39.2727	101.408	1.36857	-1.30858	0.190678	0.327967	no
XLOC_019046	XLOC_019046	ISCW022133	DS913072:273876-278589	ISG	IL	OK	6.21833	4.50659	-0.464492	0.423402	0.672002	0.789335	no
XLOC_019054	XLOC_019054	ISCW022132	DS913072:262653-273415	ISG	IL	OK	85.6823	40.0985	-1.09545	1.066	0.286422	0.440746	no
XLOC_019045	XLOC_019045	ISCW022131	DS913072:253469-260193	ISG	IL	OK	193.425	255.422	0.401109	-0.38396	0.701008	0.807864	no
XLOC_019044	XLOC_019044	ISCW022130	DS913072:252084-252984	ISG	IL	OK	10.5414	17.0276	0.691812	-0.733845	0.463043	0.613678	no
XLOC_019051	XLOC_019051	ISCW022126	DS913072:119073-142215	ISG	IL	OK	9.94842	10.687	0.103316	-0.103461	0.917597	0.949898	no
XLOC_019042	XLOC_019042	ISCW022124	DS913072:106465-111202	ISG	IL	OK	8.37508	5.83162	-0.522207	0.557738	0.577023	0.715182	no
XLOC_019050	XLOC_019050	ISCW022123	DS913072:91095-106172	ISG	IL	OK	37.9799	11.1299	-1.77079	1.81565	0.0694239	0.164441	no
XLOC_019041	XLOC_019041	ISCW022122	DS913072:86108-88410	ISG	IL	OK	29.8698	16.8671	-0.824474	0.818193	0.413247	0.569937	no
XLOC_019049	XLOC_019049	ISCW022121	DS913072:66488-76610	ISG	IL	OK	12.9575	20.4887	0.661039	-0.697546	0.485461	0.633622	no
XLOC_018596	XLOC_018596	ISCW022117	DS906440:171142-175701	ISG	IL	OK	15.4448	14.8235	-0.0592351	0.0607421	0.951565	0.971211	no
XLOC_018591	XLOC_018591	ISCW022116	DS906440:157660-164375	ISG	IL	OK	21.0254	12.1272	-0.793895	0.832597	0.405072	0.561219	no
XLOC_018595	XLOC_018595	ISCW022115	DS906440:148629-153245	ISG	IL	OK	58.9106	5.16164	-3.51263	3.57934	0.000344465	0.00488339	yes	overexpressed in ISG
XLOC_018590	XLOC_018590	ISCW022114	DS906440:110520-146914	ISG	IL	OK	105.367	49.667	-1.08506	0.958663	0.337729	0.493064	no
XLOC_018594	XLOC_018594	ISCW022113	DS906440:91930-97277	ISG	IL	OK	134.964	60.8164	-1.15005	1.13631	0.255828	0.406605	no
XLOC_018589	XLOC_018589	ISCW022112	DS906440:84985-88025	ISG	IL	OK	73.5338	23.3355	-1.65588	1.57326	0.115658	0.2354	no
XLOC_018593	XLOC_018593	ISCW022111	DS906440:45655-50191	ISG	IL	OK	267.136	118.638	-1.17102	1.08896	0.276174	0.429017	no
XLOC_018588	XLOC_018588	ISCW022110	DS906440:40292-41108	ISG	IL	OK	3.40244	0	-1.79769e+308	-1.79769e+308	0.0146491	0.066059	no
XLOC_018587	XLOC_018587	ISCW022109	DS906440:15929-28834	ISG	IL	OK	9.30895	0.575916	-4.01469	3.74867	0.000177773	0.00302504	yes	overexpressed in ISG
XLOC_018592	XLOC_018592	ISCW022108	DS906440:7277-15355	ISG	IL	OK	363.675	522.366	0.522413	-0.483668	0.628622	0.754306	no
XLOC_020236	XLOC_020236	ISCW022102	DS930883:134843-141980	ISG	IL	OK	0.494942	3.76632	2.92783	-2.36785	0.0178916	0.0693894	no
XLOC_020088	XLOC_020088	ISCW022095	DS928724:129114-129978	ISG	IL	OK	11.7839	12.349	0.0675854	-0.0719414	0.942649	0.965673	no
XLOC_017979	XLOC_017979	ISCW022092	DS896569:16327-20683	ISG	IL	OK	3.34196	1.18976	-1.49003	1.52192	0.128029	0.253559	no
XLOC_017978	XLOC_017978	ISCW022091	DS896569:3850-4903	ISG	IL	OK	51.6411	23.2871	-1.14899	1.19772	0.231026	0.377312	no
XLOC_019533	XLOC_019533	ISCW022087	DS921635:60628-75517	ISG	IL	OK	27.8672	0.872672	-4.99699	4.07107	4.67969e-05	0.00115671	yes	overexpressed in ISG
XLOC_019534	XLOC_019534	ISCW022086	DS921635:5062-6447	ISG	IL	OK	0	73.0605	1.79769e+308	1.79769e+308	0.0151528	0.0668948	no
XLOC_017767	XLOC_017767	ISCW022085	DS892946:348937-360244	ISG	IL	OK	6.17035	1.85498	-1.73395	1.80422	0.0711967	0.167053	no
XLOC_017765	XLOC_017765	ISCW022081	DS892946:298023-309732	ISG	IL	OK	7.09227	92.5191	3.70543	-3.85785	0.000114388	0.00226192	yes	overexpressed in IL
XLOC_017764	XLOC_017764	ISCW022080	DS892946:288734-289163	ISG	IL	OK	2.46421	2.50023	0.0209353	-0.0185292	0.985217	0.989877	no
XLOC_017769	XLOC_017769	ISCW022077	DS892946:216091-237708	ISG	IL	OK	1.82696	0.602818	-1.59965	1.66556	0.0958005	0.203678	no
XLOC_017761	XLOC_017761	ISCW022075	DS892946:144277-163275	ISG	IL	OK	1.23761	1.39522	0.172938	-0.131313	0.895528	0.935505	no
XLOC_017759	XLOC_017759	ISCW022071	DS892946:87621-114997	ISG	IL	OK	4.79294	16.7273	1.80322	-1.85268	0.0639281	0.154747	no
XLOC_017758	XLOC_017758	ISCW022070	DS892946:83589-86272	ISG	IL	OK	12.6337	66.2282	2.39017	-2.50299	0.0123149	0.0628009	no
XLOC_017757	XLOC_017757	ISCW022069	DS892946:45350-60841	ISG	IL	OK	22.8469	36.126	0.661039	-0.697546	0.485461	0.633622	no
XLOC_019100	XLOC_019100	ISCW022068	DS914424:134027-134471	ISG	IL	OK	1.84603	1.56085	-0.242099	0.193771	0.846355	0.907957	no
XLOC_019101	XLOC_019101	ISCW022067	DS914424:7305-47174	ISG	IL	OK	2.80827	1.16479	-1.26961	1.33898	0.180576	0.314173	no
XLOC_018156	XLOC_018156	ISCW022065	DS899572:101598-123993	ISG	IL	OK	7.82818	16.0083	1.03208	-1.07631	0.281787	0.435533	no
XLOC_018155	XLOC_018155	ISCW022064	DS899572:96579-97451	ISG	IL	OK	578.023	917.709	0.666911	-0.617307	0.537032	0.681389	no
XLOC_018152	XLOC_018152	ISCW022062	DS899572:66090-70817	ISG	IL	OK	454.562	123.641	-1.87832	1.81166	0.0700384	0.165316	no
XLOC_018154	XLOC_018154	ISCW022061	DS899572:50375-64250	ISG	IL	OK	84.9786	22.9704	-1.88732	1.82877	0.0674334	0.160422	no
XLOC_018151	XLOC_018151	ISCW022060	DS899572:23314-45668	ISG	IL	OK	2.5118	35.583	3.8244	-3.90847	9.28823e-05	0.00194039	yes	overexpressed in IL
XLOC_019277	XLOC_019277	ISCW022052	DS917313:217743-254634	ISG	IL	OK	1.83396	1.11646	-0.71603	0.746048	0.455638	0.607288	no
XLOC_019948	XLOC_019948	ISCW022042	DS926387:1164398-1165744	ISG	IL	OK	5.4343	99.4441	4.19372	-4.33394	1.46465e-05	0.000502395	yes	overexpressed in IL
XLOC_019947	XLOC_019947	ISCW022041	DS926387:1143561-1161915	ISG	IL	OK	11.9403	2.71481	-2.13692	2.23092	0.0256864	0.0833567	no
XLOC_019958	XLOC_019958	ISCW022040	DS926387:970965-989344	ISG	IL	OK	4.55349	2.60618	-0.805035	0.85881	0.390445	0.546555	no
XLOC_019954	XLOC_019954	ISCW022033	DS926387:804234-805497	ISG	IL	OK	46.4776	0	-1.79769e+308	-1.79769e+308	0.0141828	0.066059	no
XLOC_019953	XLOC_019953	ISCW022031	DS926387:782954-799880	ISG	IL	OK	90.8152	17.1255	-2.40679	2.39426	0.016654	0.0678946	no
XLOC_019944	XLOC_019944	ISCW022030	DS926387:781352-782857	ISG	IL	OK	56.8248	324.897	2.51539	-2.34759	0.0188951	0.0705669	no
XLOC_019943	XLOC_019943	ISCW022029	DS926387:758915-774365	ISG	IL	OK	32.7714	44.2875	0.434463	-0.438297	0.661171	0.780784	no
XLOC_019952	XLOC_019952	ISCW022028	DS926387:756988-758548	ISG	IL	OK	51.5337	26.4158	-0.964114	0.953064	0.340557	0.495455	no
XLOC_019951	XLOC_019951	ISCW022026	DS926387:717784-730712	ISG	IL	OK	406.98	98.0504	-2.05336	1.90688	0.0565356	0.140591	no
XLOC_019940	XLOC_019940	ISCW022024	DS926387:672600-675448	ISG	IL	OK	1.8517	93.2859	5.65474	-5.72866	1.01224e-08	1.43326e-06	yes	overexpressed in IL
XLOC_019939	XLOC_019939	ISCW022023	DS926387:666675-671437	ISG	IL	OK	1.95585	1.37809	-0.505134	0.494065	0.621261	0.748056	no
XLOC_019937	XLOC_019937	ISCW022021	DS926387:614615-643554	ISG	IL	OK	1.14168	0.673468	-0.761473	0.807654	0.41929	0.575495	no
XLOC_019934	XLOC_019934	ISCW022017	DS926387:156590-165572	ISG	IL	OK	0	16.6483	1.79769e+308	1.79769e+308	0.015425	0.0668948	no
XLOC_018004	XLOC_018004	ISCW022011	DS896920:360919-362225	ISG	IL	OK	5.08238	2.31389	-1.13518	1.16846	0.242621	0.391919	no
XLOC_018000	XLOC_018000	ISCW022010	DS896920:290285-311456	ISG	IL	OK	1.08256	58.0575	5.74496	-5.73831	9.56244e-09	1.37089e-06	yes	overexpressed in IL
XLOC_018002	XLOC_018002	ISCW022008	DS896920:210604-211820	ISG	IL	OK	0.432018	8.21874	4.24975	-4.34612	1.38565e-05	0.000483042	yes	overexpressed in IL
XLOC_017999	XLOC_017999	ISCW022007	DS896920:151132-168816	ISG	IL	OK	18.2416	37.2735	1.03092	-1.06935	0.284911	0.439029	no
XLOC_017998	XLOC_017998	ISCW022006	DS896920:115771-125381	ISG	IL	OK	13.9314	8.1733	-0.769346	0.818132	0.413282	0.569937	no
XLOC_017997	XLOC_017997	ISCW022004	DS896920:95525-101589	ISG	IL	OK	5.6883	2.29026	-1.31249	1.29847	0.194126	0.332602	no
XLOC_017996	XLOC_017996	ISCW022003	DS896920:42247-89851	ISG	IL	OK	35.2358	7.58861	-2.21513	2.26575	0.0234667	0.0778759	no
XLOC_017995	XLOC_017995	ISCW022002	DS896920:17769-34658	ISG	IL	OK	48.5148	40.0194	-0.277723	0.270081	0.787098	0.869591	no
XLOC_018001	XLOC_018001	ISCW022001	DS896920:15464-15719	ISG	IL	OK	25.9642	3.13616	-3.04945	1.91415	0.0556006	0.138936	no
XLOC_019293	XLOC_019293	ISCW022000	DS917723:290607-301919	ISG	IL	OK	4.42405	0.575476	-2.94254	1.84738	0.0646914	0.155511	no
XLOC_019292	XLOC_019292	ISCW021999	DS917723:266840-275936	ISG	IL	OK	26.9694	0	-1.79769e+308	-1.79769e+308	0.0188492	0.0705669	no
XLOC_019295	XLOC_019295	ISCW021998	DS917723:98212-128594	ISG	IL	OK	35.5309	9.06924	-1.97002	2.03926	0.0414239	0.11081	no
XLOC_018071	XLOC_018071	ISCW021994	DS898430:1630-20045	ISG	IL	OK	17.8954	2.86689	-2.64203	2.7134	0.0066596	0.0405194	yes	overexpressed in ISG
XLOC_020072	XLOC_020072	ISCW021992	DS928434:632683-632875	ISG	IL	OK	128.628	391.411	1.60548	-1.72298	0.084892	0.186376	no
XLOC_020059	XLOC_020059	ISCW021991	DS928434:574651-629446	ISG	IL	OK	2.37492	2.60416	0.13294	-0.138056	0.890196	0.93453	no
XLOC_020052	XLOC_020052	ISCW021980	DS928434:384802-385738	ISG	IL	OK	78.8037	86.2551	0.130347	-0.131321	0.895521	0.935505	no
XLOC_020051	XLOC_020051	ISCW021979	DS928434:367226-375568	ISG	IL	OK	27.5035	4.74584	-2.53488	2.50922	0.0120997	0.0621458	no
XLOC_020050	XLOC_020050	ISCW021978	DS928434:359278-364319	ISG	IL	OK	21.7209	1.18486	-4.1963	2.64629	0.00813805	0.0470677	yes	overexpressed in ISG
XLOC_020049	XLOC_020049	ISCW021977	DS928434:317597-339113	ISG	IL	OK	5.11962	1.04149	-2.29738	2.39235	0.0167408	0.0678946	no
XLOC_020067	XLOC_020067	ISCW021976	DS928434:281992-294119	ISG	IL	OK	50.5096	111.037	1.13641	-1.09825	0.272094	0.423931	no
XLOC_020048	XLOC_020048	ISCW021975	DS928434:257976-259175	ISG	IL	OK	11.0956	16.3479	0.559121	-0.583201	0.559758	0.700896	no
XLOC_020047	XLOC_020047	ISCW021974	DS928434:253308-257897	ISG	IL	OK	9.78839	1.28741	-2.9266	2.97595	0.00292087	0.0228353	yes	overexpressed in ISG
XLOC_020046	XLOC_020046	ISCW021973	DS928434:218493-248056	ISG	IL	OK	2.89963	0	-1.79769e+308	-1.79769e+308	0.0194737	0.0705669	no
XLOC_020066	XLOC_020066	ISCW021971	DS928434:199939-210544	ISG	IL	OK	21.9518	13.1878	-0.735139	0.781864	0.434295	0.589893	no
XLOC_020065	XLOC_020065	ISCW021970	DS928434:180846-195857	ISG	IL	OK	6.46305	1.88435	-1.77815	1.85462	0.0636512	0.154239	no
XLOC_020064	XLOC_020064	ISCW021969	DS928434:116529-122682	ISG	IL	OK	66.5494	93.7298	0.494082	-0.476433	0.633766	0.75905	no
XLOC_020063	XLOC_020063	ISCW021968	DS928434:97871-113307	ISG	IL	OK	29.9577	10.3473	-1.53367	1.56337	0.117967	0.239334	no
XLOC_020044	XLOC_020044	ISCW021967	DS928434:92598-93822	ISG	IL	OK	3.9647	4.34881	0.13341	-0.143284	0.886066	0.933201	no
XLOC_020062	XLOC_020062	ISCW021966	DS928434:68550-90086	ISG	IL	OK	48.4425	16.0457	-1.59408	1.6242	0.104332	0.217519	no
XLOC_020043	XLOC_020043	ISCW021965	DS928434:46753-58784	ISG	IL	OK	3.7512	2.02449	-0.889797	0.943435	0.345458	0.500829	no
XLOC_020061	XLOC_020061	ISCW021964	DS928434:37183-39999	ISG	IL	OK	15.4356	14.7192	-0.0685629	0.0693205	0.944735	0.966876	no
XLOC_020042	XLOC_020042	ISCW021962	DS928434:20126-36742	ISG	IL	OK	0.982517	2.21528	1.17294	-1.24306	0.213846	0.354371	no
XLOC_018214	XLOC_018214	ISCW021957	DS900861:183-10135	ISG	IL	OK	3.0918	11.0376	1.8359	-1.90743	0.0564645	0.140445	no
XLOC_020123	XLOC_020123	ISCW021950	DS929120:155719-155995	ISG	IL	OK	1.4477	9.7924	2.7579	-1.70981	0.0873001	0.189702	no
XLOC_020122	XLOC_020122	ISCW021949	DS929120:79427-88005	ISG	IL	OK	7.79651	0.941723	-3.04945	3.11173	0.00185997	0.0163589	yes	overexpressed in ISG
XLOC_020121	XLOC_020121	ISCW021948	DS929120:10345-32621	ISG	IL	OK	242.836	210.374	-0.207026	0.191051	0.848485	0.909465	no
XLOC_020183	XLOC_020183	ISCW021942	DS930038:177449-187890	ISG	IL	OK	73.2582	147.365	1.00833	-0.994334	0.32006	0.475454	no
XLOC_020179	XLOC_020179	ISCW021939	DS930038:155236-176106	ISG	IL	OK	1.10621	0.595199	-0.894176	0.920287	0.357423	0.513437	no
XLOC_020181	XLOC_020181	ISCW021938	DS930038:125108-145192	ISG	IL	OK	11.8826	8.42169	-0.496672	0.518946	0.603798	0.736224	no
XLOC_020178	XLOC_020178	ISCW021937	DS930038:72862-106937	ISG	IL	OK	8.6939	2.94033	-1.56403	1.64804	0.0993441	0.209378	no
XLOC_017803	XLOC_017803	ISCW021931	DS893390:225996-230385	ISG	IL	OK	10.889	13.9224	0.354545	-0.380601	0.703499	0.809271	no
XLOC_017795	XLOC_017795	ISCW021930	DS893390:203931-222006	ISG	IL	OK	93.3402	62.4287	-0.580288	0.552023	0.580933	0.718352	no
XLOC_017802	XLOC_017802	ISCW021929	DS893390:196928-197610	ISG	IL	OK	83.6004	26.1798	-1.67506	1.74857	0.0803656	0.178626	no
XLOC_017794	XLOC_017794	ISCW021928	DS893390:184229-187040	ISG	IL	OK	8.84809	2.3019	-1.94254	1.98833	0.0467756	0.121291	no
XLOC_017793	XLOC_017793	ISCW021926	DS893390:160650-171814	ISG	IL	OK	10.7037	1.97971	-2.43474	2.49362	0.0126447	0.0639939	no
XLOC_017792	XLOC_017792	ISCW021925	DS893390:83083-83536	ISG	IL	OK	17.3373	3.75869	-2.20557	2.18752	0.0287045	0.0878738	no
XLOC_017800	XLOC_017800	ISCW021924	DS893390:75311-82540	ISG	IL	OK	3394.5	5154.89	0.60274	-0.483256	0.628914	0.754578	no
XLOC_017790	XLOC_017790	ISCW021922	DS893390:37384-50460	ISG	IL	OK	6.54893	1.10744	-2.56403	2.62398	0.00869096	0.0493693	yes	overexpressed in ISG
XLOC_017789	XLOC_017789	ISCW021920	DS893390:21407-22905	ISG	IL	OK	13.9246	6.13648	-1.18216	1.2337	0.217316	0.359239	no
XLOC_017798	XLOC_017798	ISCW021919	DS893390:20048-20969	ISG	IL	OK	3.51208	0.258219	-3.76566	2.37304	0.0176425	0.0689517	no
XLOC_017788	XLOC_017788	ISCW021918	DS893390:0-19048	ISG	IL	OK	2.12738	2.34617	0.14123	-0.149702	0.881	0.929719	no
XLOC_017866	XLOC_017866	ISCW021913	DS895194:105-35550	ISG	IL	OK	7.12256	3.10824	-1.1963	1.25066	0.211059	0.350868	no
XLOC_019894	XLOC_019894	ISCW021910	DS926118:462626-473916	ISG	IL	OK	414.594	131.013	-1.66199	1.50384	0.132622	0.260052	no
XLOC_019893	XLOC_019893	ISCW021909	DS926118:375251-375542	ISG	IL	OK	593.229	54.4516	-3.44554	3.52358	0.000425758	0.00567415	yes	overexpressed in ISG
XLOC_019892	XLOC_019892	ISCW021908	DS926118:327720-341436	ISG	IL	OK	15.3707	6.76881	-1.18321	1.25195	0.210587	0.350338	no
XLOC_019903	XLOC_019903	ISCW021906	DS926118:289956-310630	ISG	IL	OK	5.75414	2.04851	-1.49003	1.55204	0.120652	0.242267	no
XLOC_019901	XLOC_019901	ISCW021903	DS926118:243083-255902	ISG	IL	OK	7.81043	2.20128	-1.82706	1.71342	0.0866348	0.189128	no
XLOC_019898	XLOC_019898	ISCW021900	DS926118:125321-192255	ISG	IL	OK	8.82892	3.22586	-1.45255	1.48159	0.13845	0.268495	no
XLOC_019889	XLOC_019889	ISCW021899	DS926118:109442-121749	ISG	IL	OK	59.072	33.2975	-0.827062	0.817115	0.413863	0.570435	no
XLOC_019896	XLOC_019896	ISCW021897	DS926118:34392-66064	ISG	IL	OK	0.382977	4.28666	3.48452	-3.64156	0.000270993	0.00410571	yes	overexpressed in IL
XLOC_018719	XLOC_018719	ISCW021891	DS908565:205424-250689	ISG	IL	OK	1.17177	1.26095	0.105824	-0.107218	0.914616	0.947924	no
XLOC_018716	XLOC_018716	ISCW021886	DS908565:28182-63021	ISG	IL	OK	5.57421	0	-1.79769e+308	-1.79769e+308	0.0162914	0.0672943	no
XLOC_018715	XLOC_018715	ISCW021885	DS908565:13877-14939	ISG	IL	OK	1.13557	0	-1.79769e+308	-1.79769e+308	0.0194336	0.0705669	no
XLOC_016584	XLOC_016584	ISCW021871	DS873409:162667-164519	ISG	IL	OK	0	2.29549	1.79769e+308	1.79769e+308	0.158655	0.285968	no
XLOC_016057	XLOC_016057	ISCW021867	DS864024:74729-76690	ISG	IL	OK	13.2291	2.03371	-2.70153	1.69316	0.0904256	0.19411	no
XLOC_016056	XLOC_016056	ISCW021866	DS864024:44578-49687	ISG	IL	OK	11.7296	0.770297	-3.9286	3.96054	7.47811e-05	0.00164936	yes	overexpressed in ISG
XLOC_016335	XLOC_016335	ISCW021864	DS868942:144528-145063	ISG	IL	OK	2.33116	3.37891	0.535508	-0.513423	0.607655	0.739171	no
XLOC_016333	XLOC_016333	ISCW021863	DS868942:122523-144282	ISG	IL	OK	29.2122	15.9625	-0.871887	0.867843	0.38548	0.541599	no
XLOC_016332	XLOC_016332	ISCW021862	DS868942:120471-120729	ISG	IL	OK	0	9.06067	1.79769e+308	1.79769e+308	0.0416323	0.11081	no
XLOC_016334	XLOC_016334	ISCW021861	DS868942:112873-115117	ISG	IL	OK	10.7146	10.8015	0.0116575	-0.0120259	0.990405	0.993437	no
XLOC_016331	XLOC_016331	ISCW021860	DS868942:102851-109725	ISG	IL	OK	53.0221	84.6119	0.674266	-0.6409	0.521587	0.667148	no
XLOC_016330	XLOC_016330	ISCW021859	DS868942:41465-64177	ISG	IL	OK	3.47141	1.76107	-0.979065	1.03711	0.299685	0.455605	no
XLOC_015902	XLOC_015902	ISCW021858	DS861789:286923-321671	ISG	IL	OK	290.762	62.4532	-2.21899	2.03861	0.0414889	0.11081	no
XLOC_015906	XLOC_015906	ISCW021857	DS861789:204522-228904	ISG	IL	OK	11.9491	2.12697	-2.49003	2.04757	0.0406019	0.11081	no
XLOC_015905	XLOC_015905	ISCW021856	DS861789:191701-204296	ISG	IL	OK	220.422	11.6704	-4.23934	4.19254	2.75846e-05	0.000786985	yes	overexpressed in ISG
XLOC_015901	XLOC_015901	ISCW021855	DS861789:185757-187447	ISG	IL	OK	9.52777	12.1889	0.355354	-0.369558	0.711712	0.812686	no
XLOC_015900	XLOC_015900	ISCW021852	DS861789:123727-182726	ISG	IL	OK	3.01179	1.91321	-0.654624	0.692039	0.488913	0.637632	no
XLOC_015903	XLOC_015903	ISCW021851	DS861789:107817-118788	ISG	IL	OK	1.09658	0.794723	-0.464492	0.423402	0.672002	0.789335	no
XLOC_015899	XLOC_015899	ISCW021850	DS861789:42247-84913	ISG	IL	OK	43.9175	13.0188	-1.7542	1.64984	0.0989754	0.208936	no
XLOC_015221	XLOC_015221	ISCW021848	DS852006:119564-121076	ISG	IL	OK	0	6.37876	1.79769e+308	1.79769e+308	0.0142954	0.066059	no
XLOC_015823	XLOC_015823	ISCW021838	DS860684:504547-633686	ISG	IL	OK	4.31549	2.05973	-1.06707	1.08851	0.276372	0.429203	no
XLOC_015814	XLOC_015814	ISCW021837	DS860684:497309-501509	ISG	IL	OK	2.59024	2.50295	-0.049454	0.0530096	0.957724	0.974635	no
XLOC_015822	XLOC_015822	ISCW021836	DS860684:477594-497106	ISG	IL	OK	31.2052	6.2472	-2.32051	2.38034	0.0172965	0.0683574	no
XLOC_015813	XLOC_015813	ISCW021835	DS860684:475174-476008	ISG	IL	OK	12.1748	19.9997	0.716081	-0.757989	0.448457	0.600454	no
XLOC_015812	XLOC_015812	ISCW021834	DS860684:462620-470639	ISG	IL	OK	25.8083	8.89799	-1.53628	1.59699	0.110268	0.22671	no
XLOC_015821	XLOC_015821	ISCW021833	DS860684:408534-458844	ISG	IL	OK	3.47921	0.897475	-1.95482	2.04559	0.040797	0.11081	no
XLOC_015809	XLOC_015809	ISCW021829	DS860684:257588-273168	ISG	IL	OK	0.337149	2.85064	3.07983	-1.88689	0.0591748	0.145545	no
XLOC_015808	XLOC_015808	ISCW021828	DS860684:253818-256003	ISG	IL	OK	342.357	176.836	-0.953091	0.934076	0.350265	0.505624	no
XLOC_015806	XLOC_015806	ISCW021826	DS860684:172179-187343	ISG	IL	OK	0.346817	2.34591	2.7579	-1.70981	0.0873001	0.189702	no
XLOC_015819	XLOC_015819	ISCW021825	DS860684:14271-26033	ISG	IL	OK	4.30297	1.11945	-1.94254	1.588	0.112286	0.229843	no
XLOC_015525	XLOC_015525	ISCW021824	DS856741:77346-99274	ISG	IL	OK	1.9666	0.692829	-1.50513	1.57268	0.115793	0.235634	no
XLOC_015523	XLOC_015523	ISCW021822	DS856741:39-51810	ISG	IL	OK	19.3776	3.13225	-2.62912	2.6115	0.00901465	0.0506065	no
XLOC_015608	XLOC_015608	ISCW021821	DS857574:1050-1411	ISG	IL	OK	35.2938	13.773	-1.35758	1.34931	0.177237	0.309161	no
XLOC_016349	XLOC_016349	ISCW021819	DS869336:153268-187038	ISG	IL	OK	0.42783	6.14952	3.84536	-3.1532	0.0016149	0.0147747	yes	overexpressed in IL
XLOC_016348	XLOC_016348	ISCW021817	DS869336:54950-101036	ISG	IL	OK	0.0608849	6.3834	6.7121	-4.22509	2.38847e-05	0.000702393	yes	overexpressed in IL
[truncated: 10,046 more rows]

## Sheet: only expressed in IL
test_id	gene_id	gene	locus	sample_1	sample_2	status	value_1	value_2	gene mapping control	Uniprot mapping control	Entry	Protein names	Organism	Gene names	Gene ontology (GO)	Domains	InterPro	Keywords	Length	Pathway	Protein families	PubMed ID	Subcellular location	Cross-reference (REFSEQ)	Cross-reference (DBSNP)	Cross-reference (ENSEMBL)	Cross-reference (GENEID)	Cross-reference (KEGG)	Cross-reference (UCSC)	Cross-reference (REACTOME)	Cross-reference (GO)	Cross-reference (INTERPRO)	EC number	Features	General annotation (CATALYTIC_ACTIVITY)	General annotation (FUNCTION)	General annotation (INDUCTION)	General annotation (DISEASE)	General annotation (PATHWAY)	General annotation (PHARMACEUTICAL)	General annotation (POLYMORPHISM)	General annotation (SUBCELLULAR_LOCATION)	General annotation (TISSUE_SPECIFICITY)	Mapped PubMed ID	Sequence
[truncated: 607 more rows]

[truncated: 3 more sheets: only expressed in ISG, overexpressed in IL, Overexpressed in ISG]
