# Supplementary material for: A Vaccinomics Approach for the Identification of Tick Protective Antigens for the Control of Ixodes ricinus and Dermacentor reticulatus Infestations in Companion Animals
Source: Front Physiol. 2019 Jul 26;10:977. doi: 10.3389/fphys.2019.00977 (PMC6681794; doi:10.3389/fphys.2019.00977)
Supplement: Supplementary file 4 [file Data_Sheet_4.xlsx]

## Sheet: GO
Supplementary Dataset 4. GO annotation for genes selected as encoding for candidate tick protective antigens
Ixodes gene ID	Genbank accession No. for I. scapularis	Dermacentor gene ID	Encoded protein	Biological Process	Cellular Component	Molecular Function
472	ISCW000027, XM_002433472	ND	Hypothetical protein	Unknown	Membrane	Unknown
529	ISCW002303, XM_002399529	S26	Hypothetical protein	Unknown	Membrane	Unknown
O82	ISCW024295, XM_002434082	S20	Secreted protein	Unknown	Membrane	Unknown
869	ISCW006458, XM_002434869	ND	Hypothetical protein	Unknown	Membrane	Unknown
965	ISCW023699, XM_002415965	ND	Conserved hypothetical protein	Unknown	Membrane	Unknown
922	ISCW021228, XM_002403922	ND	Vitellogenin	Oogenesis	Extracellular	Lipid transporter
391	ISCW021710, XM_002411391	S10	Heme lipoprotein	Heme transport	Extracellular	Heme transporter
749	ISCW016308, XM_002407749	S27	Hypothetical protein	Unknown	Membrane	Unknown
216	ISCW010436, XM_002406216	S14	Secreted salivary gland peptide	Unknown	Membrane	Unknown
892	ISCW002948, XM_002409892	S5	Gap1	Signal transduction	Membrane	GTP binding
450	ISCW018653, XM_002434450	S21	Vacuolar H+ ATPase	Development	Membrane	Protein binding
950	ISCW013911, XM_002415950	S19	Hypothetical protein	Unknown	Membrane	Unknown
158	ISCW019448, XM_002401158	S8	Glypican	Development	Membrane	Heparan sulfate proteoglycan binding
459	ISCW011801, XM_002411459	S11	Hypothetical protein	Unknown	Membrane	Unknown
251	ISCW023637, XM_002416251	ND	Secreted metalloprotease	Development	Extracellular	Ion binding
623	ISCW015091, XM_002414623	ND	Hypothetical protein	Unknown	Membrane	Unknown
738	ISCW012232, XM_002413738	S13	Sodium/glucose cotransporter	Transmembrane transport	Membrane	Glucose transporter
874	ISCW006195, XM_002399874	S25	Fasciclin domain-containing protein	Cell adhesion	Membrane	Protein binding
908	ISCW014557, XM_002414908	S17	Secreted protein	Homophilic cell adhesion via plasma membrane adhesion molecules	Membrane	Cell-cell adhesion mediator activity
150	ISCW006313, XM_002436150	S24	Secreted protein	Unknown	Membrane	Unknown
556	ISCW006654, XM_002400556	ND	Gamma-interferon inducible lysosomal thiol reductase	Immunity	Extracellular	Oxidoreductase
O16	ISCW019023, XM_002436016	S23	Secreted protein	Unknown	Membrane	Unknown
971	ISCW006734, XM_002435971	ND	Hypothetical protein	Unknown	Membrane	Unknown
964	ISCW001819, XM_002402964	S1	Conserved hypothetical protein	Unknown	Membrane	Unknown
427	ISCW015065, XM_002414427	S15	Solute carrier	Transmembrane transport	Membrane	Transporter
490	ISCW003957, XM_002399490	S7	Aquaporin	Oviposition	Membrane	Water channel activity
O58	ISCW023239, XM_002415058	S18	Sulfate/anion exchanger	Transmembrane transport	Membrane	Sulfate transporter
912	ISCW002249, XM_002410912	S6	Sialin	Transmembrane transport	Membrane	Sialic acid transporter
O78	ISCW005630, XM_002435078	S22	Sialin	Transmembrane transport	Membrane	Sialic acid transporter
432	ISCW019986, XM_002404432	ND	Monocarboxylate transporter	Transmembrane transport	Membrane	Monocarboxylic transporter
O98	ISCW013157, XM_002413098	S12	Sodium-dependent multivitamin transporter	Transmembrane transport	Membrane	Transporter
624	ISCW015092, XM_002414624	S16	Sodium/solute symporter	Transmembrane transport	Membrane	Transporter
145	ISCW019568, XM_002405145	S9	Signal peptidase 12kDa subunit	Signal peptide processing	Membrane	Peptidase activity
256	ISCW016779, XM_002403256	S2	Signal peptidase complex subunit 3	Signal peptide processing	Endoplasmic reticulum	Peptidase activity
Abbreviations: ND, not identified in D. reticulatus.
